# Supplementary material
Source: PubMed Central journal article supplement (PMC7605718)
Supplement: NIHMS1637472-supplement-SI.pdf [file NIHMS1637472-supplement-SI.pdf]

# Supporting Information

## Enantioselective Diarylcarbene Insertion into Si–H Bonds Induced by Electronic Properties of the Carbenes

Liang-Liang Yang,<sup>†</sup> Declan Evans,<sup>‡</sup> Bin Xu,<sup>†</sup> Wen-Tao Li,<sup>†</sup> Mao-Lin Li,<sup>†</sup> Shou-Fei Zhu,<sup>\*,†</sup> K. N. Houk,<sup>\*,‡</sup> Qi-Lin Zhou<sup>\*,†</sup>

<sup>†</sup> State Key Laboratory and Institute of Elemento-Organic Chemistry, College of Chemistry, Nankai University, Tianjin 300071, China

<sup>‡</sup> Department of Chemistry and Biochemistry, University of California, Los Angeles, California 90095-1569, USA

\* Corresponding authors. E-mail: [sfzhu@nankai.edu.cn](mailto:sfzhu@nankai.edu.cn) (S.-F.Z.); [qlzhou@nankai.edu.cn](mailto:qlzhou@nankai.edu.cn) (Q.-L.Z.); [houk@chem.ucla.edu](mailto:houk@chem.ucla.edu) (K.N.H.)

### This PDF file includes:

Materials and Methods  
Supplementary Text  
Spectral Data  
Calculation Data  
References

## Table of Contents

|                                                                                              |             |
|----------------------------------------------------------------------------------------------|-------------|
| <b>1. General information.....</b>                                                           | <b>S3</b>   |
| <b>2. Condition optimization of enantioselective Si–H bond insertion.....</b>                | <b>S4</b>   |
| <b>3. The correlation between enantioselectivity and electronic Hammett parameters. ....</b> | <b>S6</b>   |
| <b>4. Preparation and analytical data of substrates .....</b>                                | <b>S7</b>   |
| <b>5. Preparation and analytical data of catalysts.....</b>                                  | <b>S11</b>  |
| <b>6. Typical procedure for Si–H bond insertion reaction .....</b>                           | <b>S20</b>  |
| <b>7. Analytical data of Si-H bond insertion products .....</b>                              | <b>S22</b>  |
| <b>8. Competition experiments for kinetic isotope effect .....</b>                           | <b>S44</b>  |
| <b>9. Crystal data and structures refinement .....</b>                                       | <b>S45</b>  |
| <b>10. NMR spectra for new compounds.....</b>                                                | <b>S49</b>  |
| <b>11 HPLC charts .....</b>                                                                  | <b>S122</b> |
| <b>12. Computational details .....</b>                                                       | <b>S172</b> |
| <b>13. References .....</b>                                                                  | <b>S246</b> |

## 1. General information

NMR spectra were recorded with a Bruker AV 400 spectrometer at 400 MHz ( $^1\text{H}$  NMR), 101 MHz ( $^{13}\text{C}$  NMR), 79 MHz ( $^{29}\text{Si}$  NMR), 376 MHz ( $^{19}\text{F}$  NMR), 128 MHz ( $^{11}\text{B}$  NMR) and 162 MHz ( $^{31}\text{P}$  NMR). Chemical shifts ( $\delta$  values) were reported in ppm down field from internal  $\text{Me}_4\text{Si}$  ( $^1\text{H}$  and  $^{13}\text{C}$  NMR). High Resolution Mass Spectra (HRMS) were recorded on an IonSpec FT-ICR mass spectrometer with Electron Spray Ionization (ESI) resource and Waters GCT Premier mass spectrometer. Melting points were measured on a RY-I apparatus and uncorrected. Enantioselectivities were recorded on Agilent HPLC, using a chiral stationary phase column (Daicel Co. CHIRALPAK, CHIRALCEL, Phenomenex). The chiral HPLC methods were calibrated with the corresponding racemic mixtures.

All reactions and manipulations were performed using standard Schlenk techniques. All solvents were purified and dried using standard procedures. All chiral carboxylate dirhodium complexes were purchased from Strem and TCI.

## 2. Condition optimization of enantioselective Si-H bond insertion

**Table S1. Initial screening of chiral carboxylic dirhodium catalysts<sup>a</sup>**

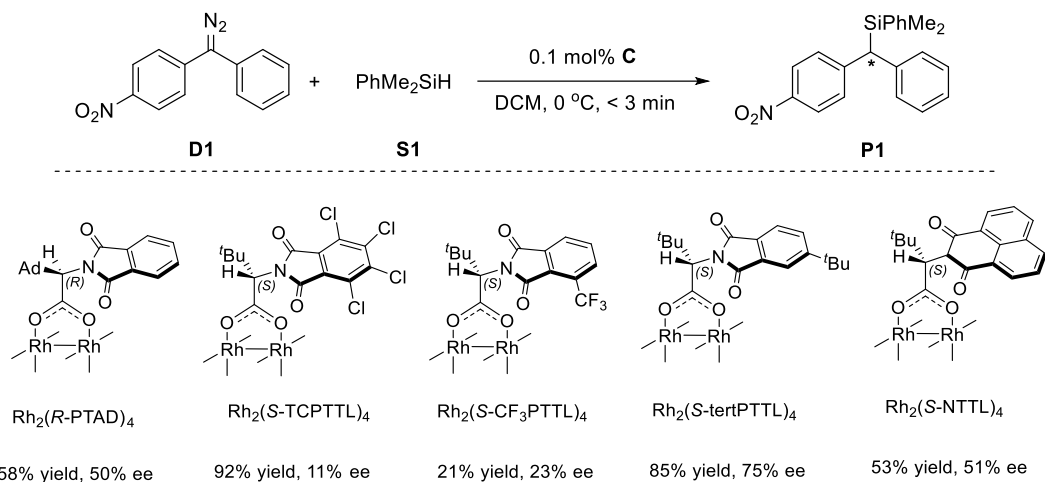

<sup>a</sup>Reaction conditions: **C/D1/S1**= 0.0002:0.2:0.24 (mmol), 1 mL solution of **D1** was dropped into 2 mL solution of **S1** and **C** at 0 °C, < 3 min, isolated yield.

**Table S2. Screening of chiral spiro phosphate dirhodium catalysts and optimization of conditions<sup>a</sup>**

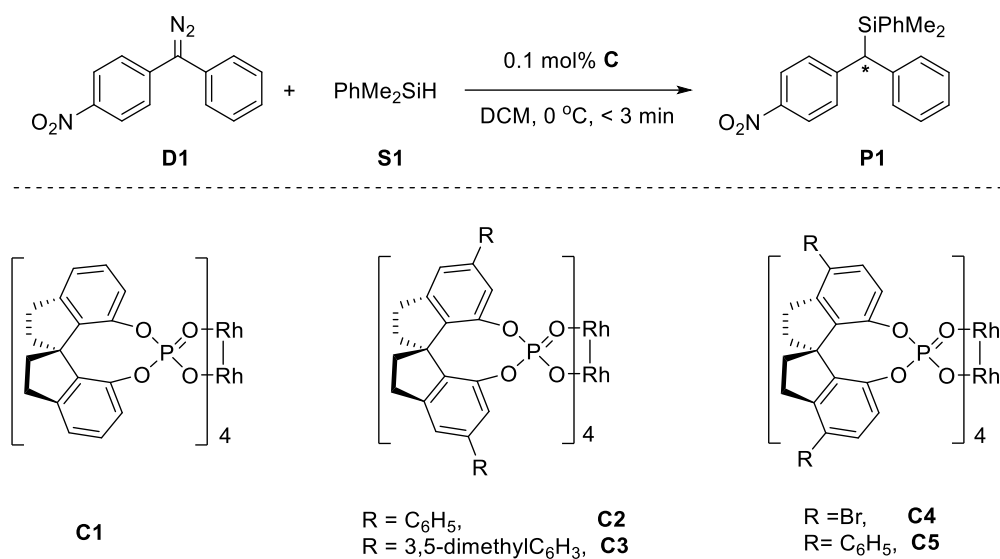

| Entry          | C         | Solvent | Yield/% | Ee/% |
|----------------|-----------|---------|---------|------|
| 1              | <b>C1</b> | DCM     | 56      | 95   |
| 2              | <b>C2</b> | DCM     | 92      | >99  |
| 3              | <b>C3</b> | DCM     | 94      | 97   |
| 4              | <b>C4</b> | DCM     | 56      | 66   |
| 5              | <b>C5</b> | DCM     | 33      | 82   |
| 6              | <b>C2</b> | toluene | 95      | 99   |
| 7              | <b>C2</b> | THF     | 65      | 99   |
| 8 <sup>b</sup> | <b>C2</b> | DCM     | 84      | >99  |
| 9 <sup>c</sup> | <b>C2</b> | DCM     | 42      | 98   |

<sup>a</sup>Reaction conditions: **C/D1/S1** = 0.0002:0.2:0.24 (mmol), 1 mL solution of **D1** was dropped into 2 mL solution of **S1** and **C** at 0 °C, < 3 min, isolated yield. <sup>b</sup>**C/D1/S1** = 0.00002:0.2:0.24, the diazo compound disappeared completely for 10 min. <sup>c</sup>**C/D1/S1** = 0.000002:0.2:0.24, the diazo compound was not decomposed completely.

### 3. The correlation between enantioselectivity and electronic Hammett parameters.

| R                | NO <sub>2</sub> | CN   | CF <sub>3</sub> | SCF <sub>3</sub> | OCF <sub>3</sub> | Cl    | Br    | I    | F         | Me    | OMe   | NMe <sub>2</sub> |
|------------------|-----------------|------|-----------------|------------------|------------------|-------|-------|------|-----------|-------|-------|------------------|
| $\Delta\sigma_p$ | 0.78            | 0.66 | 0.54            | 0.5              | 0.35             | 0.28  | 0.23  | 0.18 | 0.06      | -0.17 | -0.27 | -0.6             |
| ee/%             | 99.2            | 98   | 95(S)           | 97               | 76               | 66    | 76    | 82   | 25        | 18    | 64(R) | 90               |
| er (S/R)         | 99.6:0.4        | 99:1 | 97.5:2.5        | 98.5:1.5         | 88:12            | 83:17 | 88:12 | 91:9 | 62.5:37.5 | 41:59 | 18:82 | 5:95             |

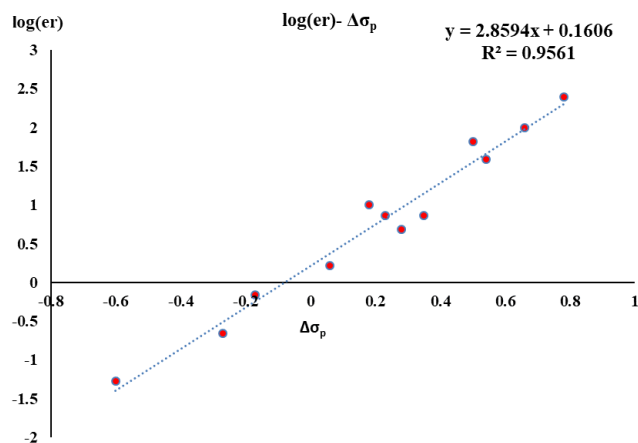

Figure S1. Plot of  $\log(er)$  vs Hammett constant  $\Delta\sigma_p$

| R <sup>1</sup>   | NO <sub>2</sub>  | NO <sub>2</sub> | NO <sub>2</sub> | NO <sub>2</sub> | NO <sub>2</sub> | NO <sub>2</sub> | NO <sub>2</sub> | CN              | CF <sub>3</sub> | OCF <sub>3</sub> | Br   | Cl       | F         | Me    |
|------------------|------------------|-----------------|-----------------|-----------------|-----------------|-----------------|-----------------|-----------------|-----------------|-----------------|-----------------|-----------------|-----------------|------------------|------|----------|-----------|-------|
| R <sup>2</sup>   | NMe <sub>2</sub> | OMe             | Me              | F               | Br              | Cl              | CF <sub>3</sub> | CF <sub>3</sub> | OMe             | Me              | F               | Br              | Cl              | OMe              | OMe  | OMe      | OMe       | OMe   |
| $\Delta\sigma_p$ | 1.38             | 1.05            | 0.95            | 0.72            | 0.55            | 0.5             | 0.24            | 0.12            | 0.81            | 0.71            | 0.48            | 0.31            | 0.26            | 0.62             | 0.5  | 0.55     | 0.33      | 0.1   |
| ee/%             | 96               | 99              | 99              | 98              | 95              | 96              | 86              | 36              | 98              | 94              | 92              | 67              | 76              | 93               | 94   | 93       | 77        | 56    |
| er               | 98:2             | 99.5:0.5        | 99.5:0.5        | 99:1            | 97.5:2.5        | 98:2            | 93:7            | 68:32           | 99:1            | 97:3            | 96:4            | 83.5:16.5       | 88:12           | 96.5:3.5         | 97:3 | 96.5:3.5 | 88.5:11.5 | 78:22 |

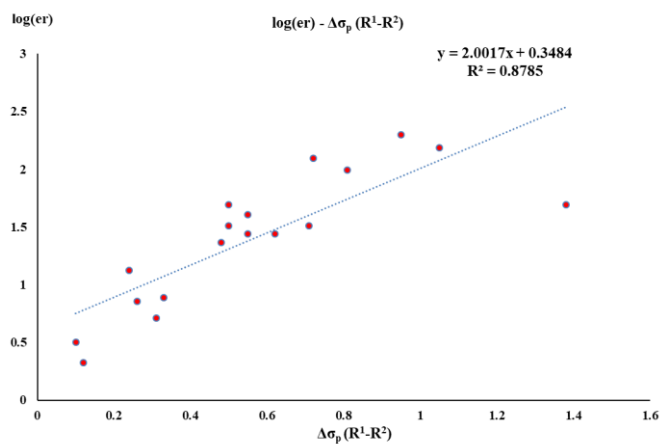

Figure S2. Plot of  $\log(er)$  vs Hammett constant  $\Delta\sigma_p(R^1-R^2)$

## 4. Preparation and analytical data of substrates

### 4.1 Preparation of diarylmethanones

(4-Nitrophenyl)(phenyl)methanone (**K1**), 4-benzoylbenzotrile (**K2**), phenyl(4-(trifluoromethyl)phenyl)methanone (**K3**), (4-chlorophenyl)(phenyl)methanone (**K6**), (4-bromophenyl)(phenyl)methanone (**K7**), (4-iodophenyl)(phenyl)methanone (**K8**), (4-fluorophenyl)(phenyl)methanone(**K9**), phenyl(*p*-tolyl)methanone (**K10**), (4-methoxyphenyl)(phenyl)methanone (**K11**), (4-(dimethylamino)phenyl)(phenyl)methanone (**K12**), (4-methoxyphenyl)(4-nitrophenyl)methanone (**K14**), (4-methoxyphenyl)(4-(trifluoromethyl)phenyl)methanone (**K26**), (4-bromophenyl)(4-methoxyphenyl)methanone (**K27**), (4-chlorophenyl)(4-methoxyphenyl)methanone (**K28**), (4-fluorophenyl)(4-methoxyphenyl)methanone (**K29**), (4-methoxyphenyl)(*p*-tolyl)methanone (**K30**), naphthalen-2-yl(phenyl)methanone (**K31**), (2-methoxyphenyl)(phenyl)methanone (**K33**), (2-chlorophenyl)(phenyl)methanone (**K39**), (2-bromophenyl)(phenyl)methanone (**K40**), (2-fluorophenyl)(phenyl)methanone (**K41**) and (2-fluorophenyl)(4-methoxyphenyl)methanone (**K42**) were purchased from Aldrich, Alfa, or TCI chemical company.

The diarylmethanones **K4**<sup>1</sup>, **K5**<sup>2</sup>, **K13**<sup>3</sup>, **K15-K18**<sup>4</sup>, **K19**<sup>5</sup>, **K20**<sup>6</sup>, **K21-K25**<sup>5,6</sup>, **K32**<sup>7</sup>, **K34-K35**<sup>7</sup>, **K36**<sup>8</sup> were prepared according to literature methods.

The new diarylmethanones were prepared by using the following procedure (taking **K37** for example).

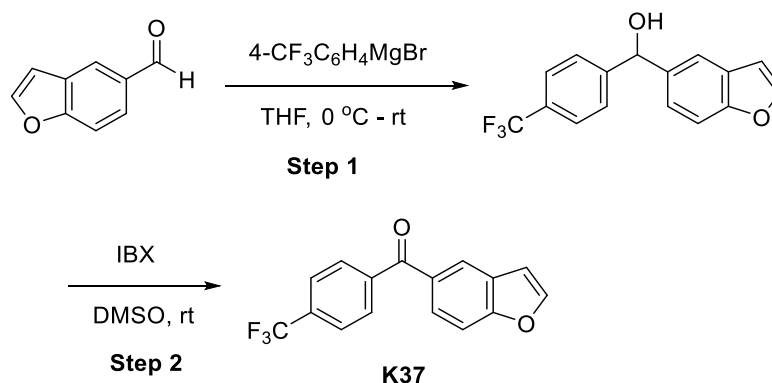

**Step 1:** A dry 250 mL Schlenk-tube equipped with a magnetic stir bar, was charged with benzofuran-5-carbaldehyde (1.5 g, 10.0 mmol) and THF (25 mL) under argon. Under vigorous stirring, a solution of bromo[4-(trifluoromethyl)phenyl]magnesium (15.0 mmol) in THF (40 mL) was slowly added under  $0\text{ }^\circ\text{C}$ . The reaction mixture was stirred under argon for 1.0 h and quenched with saturated aqueous  $\text{NH}_4\text{Cl}$  (20 mL). The aqueous layer was extracted with diethyl ether ( $3 \times 20\text{ mL}$ ). The combined organic extract was washed with brine, then dried over  $\text{MgSO}_4$ , filtered, and concentrated to give crude product. The crude product was purified by silica gel column

chromatography (eluting with petroleum ether/EtOAc, 8:1, v/v) to afford benzofuran-5-yl(4-(trifluoromethyl)phenyl)methanol (2.5 g, 85% yield) as an oil.

**Step 2:** A 100 mL Schlenk-tube equipped with a magnetic stir bar, was charged with benzofuran-5-yl(4-(trifluoromethyl)phenyl)methanol (2.3 g, 7.8 mmol) and THF (30 mL). Under vigorous stirring, 2-Iodoxybenzoic acid (3.3 g, 11.7 mmol) was added at one portion at ambient temperature. The reaction mixture was stirred for 2 h and diluted by water. The mixture was filtered and washed with EtOAc. The aqueous layer was extracted with EtOAc (3 × 40 mL). The combined organic extract was washed with brine, then dried over MgSO<sub>4</sub>, filtered, and concentrated to give a solid. The crude product was purified by silica gel column chromatography (eluting with petroleum ether/EtOAc, 15:1, v/v) to afford benzofuran-5-yl(4-(trifluoromethyl)phenyl)methanone (**K37**) (2.0 g, 86% yield) as a solid.

### benzofuran-5-yl(4-(trifluoromethyl)phenyl)methanone (**K37**)

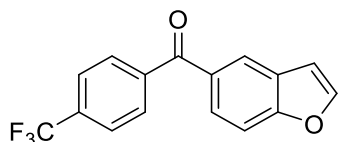

Yield: 86%. White solid. m.p. = 100–102 °C. <sup>1</sup>H NMR (400 MHz, CDCl<sub>3</sub>) δ 8.08 (d, *J* = 1.8 Hz, 1H), 7.93 – 7.87 (d, *J* = 8.1 Hz, 2H), 7.84 (dd, *J* = 8.6, 1.8 Hz, 1H), 7.77 (d, *J* = 8.1 Hz, 2H), 7.73 (d, *J* = 2.2 Hz, 1H), 7.60 (d, *J* = 8.6 Hz, 1H), 6.86 (dd, *J* = 2.2, 0.9 Hz, 1H). <sup>13</sup>C NMR (101 MHz, CDCl<sub>3</sub>) δ 195.3, 157.5, 146.7, 141.4, 133.4 (q, *J* = 32.0 Hz), 132.0, 130.0, 127.5, 126.7, 125.3 (q, *J* = 3.8 Hz), 124.6, 123.7 (q, *J* = 270.0 Hz), 111.6, 107.2. <sup>19</sup>F NMR (376 MHz, CDCl<sub>3</sub>) δ –59.3 (s, 3F). HRMS (ESI) calcd for [C<sub>16</sub>H<sub>9</sub>F<sub>3</sub>O<sub>2</sub>, M + H]<sup>+</sup>: 291.0633, Found: 291.0634.

### (1*H*-indol-5-yl)(4-(trifluoromethyl)phenyl)methanone (**K38**)

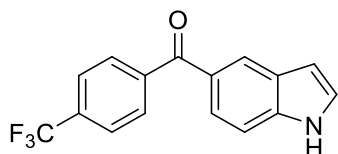

Yield: 80%. White solid. m.p. = 141–143 °C. <sup>1</sup>H NMR (400 MHz, CDCl<sub>3</sub>) δ 8.72 (s, 1H), 8.11 (s, 1H), 7.89 (d, *J* = 8.1 Hz, 2H), 7.79 (dd, *J* = 8.6, 1.5 Hz, 1H), 7.75 (d, *J* = 8.1 Hz, 2H), 7.47 (d, *J* = 8.6 Hz, 1H), 7.31 (t, *J* = 2.8 Hz, 1H), 6.65 (t, *J* = 2.8 Hz, 1H). <sup>13</sup>C NMR (101 MHz, CDCl<sub>3</sub>) δ 196.2, 142.2, 138.5, 133.0 (q, *J* = 33.0 Hz), 129.9, 128.9, 127.2, 126.1, 125.5, 125.1 (q, *J* = 4.1 Hz), 124.0, 123.8 (q, *J* = 271.0 Hz), 111.3, 104.3. <sup>19</sup>F NMR (376 MHz, CDCl<sub>3</sub>) δ –59.3 (s, 3F). HRMS (ESI) calcd for [C<sub>16</sub>H<sub>10</sub>F<sub>3</sub>NO, M + H]<sup>+</sup>: 290.0793, Found: 290.0788.

## 4.2 Preparation of diaryl hydrazones and diazomethanes

Diaryl hydrazones and diazomethanes were prepared according to the literature methods.<sup>9</sup> The following are the typical procedure for the preparation of diaryl hydrazones and diazomethanes.



## Typical procedure for preparation of diaryl hydrazones and diazomethanes

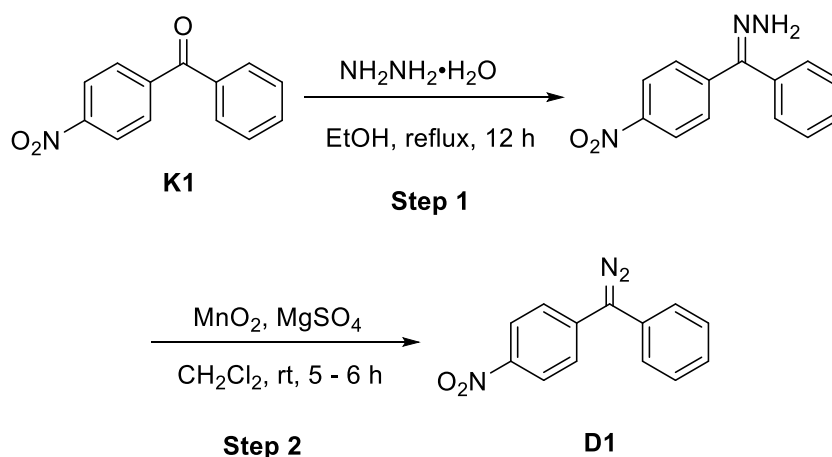

**Step 1:** Hydrazine monohydrate (80% purity, 18 mL, 300.0 mmol) was added to (4-nitrophenyl)(phenyl)methanone (6.8 g, 30.0 mmol) in ethanol (100 mL). HOAc (0.5 mL) was added and the mixture was stirred at reflux for 12 h. After cooling to room temperature, (4-nitrophenyl)(phenyl)methanone hydrazone precipitated as yellow crystal. Filtration of the crude mixture gave pure (4-nitrophenyl)(phenyl)methanone hydrazone as a yellow solid in 70% yield (5.0 g, 21.0 mmol).

When the hydrazone could not precipitate. The EtOH was removed *in vacuo*, the residue was taken up in Et<sub>2</sub>O and water. The layers were separated and the aqueous layer was extracted with Et<sub>2</sub>O (3 x 20 mL). The combined organic layer was dried with MgSO<sub>4</sub>, filtered, then concentrated *in vacuo*. Column chromatography using 15–25% EtOAc/hexanes as the eluent afforded the desired product.

(Note: An inseparable mixture of two isomers of ketone hydrazone was obtained, which was used in the next step without further purification.)

**Step 2:** (4-Nitrophenyl)(phenyl)methanone hydrazone (2.9 g, 12.0 mmol) and anhydrous MgSO<sub>4</sub> (3.6 g) were placed into an oven-dried Schlenk tube under argon atmosphere and 50 mL DCM was introduced. After cooling to 0 °C, to this rapidly stirring mixture was added activated MnO<sub>2</sub> (3.7 g, 42.0 mmol) in one portion. The reaction mixture was warmed to room temperature and stirred for 5-6 h, and filtered off the solid. The solvent was removed under reduced pressure and the crude product was used for next reaction.

(Note: The purity of compounds were determined by <sup>1</sup>H NMR, which was generally 90%~100%. The impurity was identified as (Ar<sup>1</sup>Ar<sup>2</sup>)C=N-N=C(Ar<sup>1</sup>Ar<sup>2</sup>).)

### 4.3 Preparation of silanes.

Dimethyl(phenyl)silane (**S1**), ethoxydimethylsilane (**S2**), chlorodimethylsilane (**S3**), triethylsilane (**S4**), methyldiphenylsilane (**S5**) were purchased from Aldrich, Alfa, or TCI chemical company. Dimethyl(phenylethynyl)silane (**S7**)<sup>10</sup>, (3-

chloropropyl)dimethylsilane (**S8**)<sup>11</sup>, 5-(dimethylsilyl)-1-methyl-1*H*-indole (**S9**)<sup>10</sup> were prepared according to the methodology described by the literatures.

### 5-(dimethylsilyl)-1-methyl-1*H*-indole (**S9**)

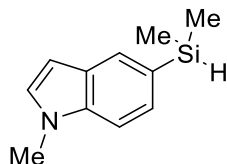

Yield: 80%. Pale yellow oil. <sup>1</sup>H NMR (400 MHz, CDCl<sub>3</sub>) δ 7.84 (s, 1H), 7.45 – 7.23 (m, 2H), 7.01 (d, *J* = 3.1 Hz, 1H), 6.47 (d, *J* = 3.1 Hz, 1H), 4.53 (hept, *J* = 3.6 Hz, 1H), 3.74 (s, 3H), 0.37 (d, *J* = 3.7 Hz, 6H). <sup>13</sup>C NMR (101 MHz, CDCl<sub>3</sub>) δ 137.3, 128.8, 128.5, 127.2, 126.7, 126.1, 109.0, 100.9, 32.7, –3.2. <sup>29</sup>Si NMR (79 MHz, CDCl<sub>3</sub>) δ –18.3. **HRMS (EI)** calcd for [C<sub>11</sub>H<sub>15</sub>NSi, M]<sup>+</sup>: 189.0974; Found 189.0966.

## 5. Preparation and analytical data of catalysts

### 5.1 Procedure for synthesis of C1<sup>12</sup>

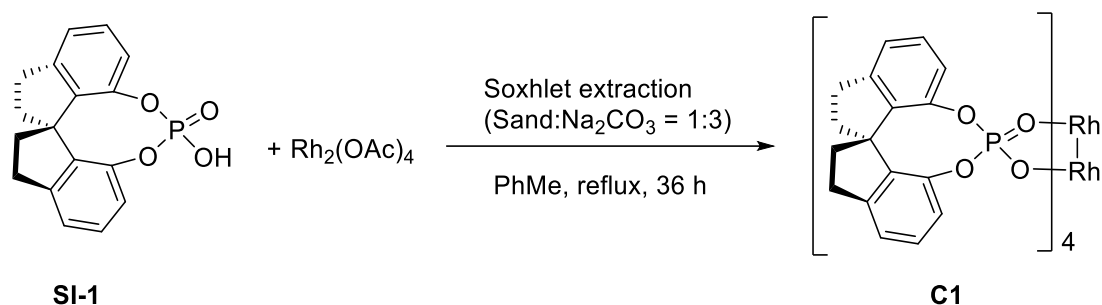

According to our previously reported procedure, **SI-1** (3.4 g, 10.8 mmol), Rh<sub>2</sub>(OAc)<sub>4</sub> (0.6 g, 1.4 mmol) and 130 mL dry toluene were introduced into a 250 mL two-necked flask. The mixture was refluxed for 36 h at reflux using a Soxhlet apparatus filled with sand and Na<sub>2</sub>CO<sub>3</sub> for the removal of acetic acid. The mixture was then concentrated under vacuum and purified by column chromatography on silica gel using DCM as mobile phase to give the crude product. The crude product was recrystallized in a mixed solvent of DCM and MeOH to give **C1** as a green needle crystal (1.5 g, 93% yield).

#### tetrakis[(*S*)-1,1'-Spirobiindanyl-7,7'-diyl-phosphate] dirhodium (II) (**C1**)

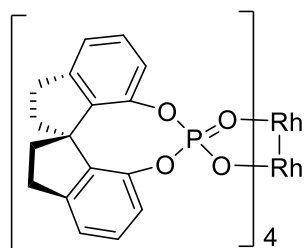

Green black needle crystal. m.p.: decomposed over 300 °C.  $[\alpha]_D^{26} +326$  (c 0.5, CHCl<sub>3</sub>). <sup>1</sup>H NMR (400 MHz, CDCl<sub>3</sub>) δ 7.13 – 6.95 (m, 24H, ArH), 3.59 (s, 2H, OH), 3.12 – 2.95 (m, 8H, 4CH<sub>2</sub>), 2.86 – 2.68 (m, 16H, 4CH<sub>2</sub> + 2CH<sub>3</sub>O + H<sub>2</sub>O), 2.26 – 2.12 (m, 8H, 4CH<sub>2</sub>), 2.06 – 1.88 (m, 8H, 4CH<sub>2</sub>). <sup>13</sup>C NMR (101 MHz, CDCl<sub>3</sub>) δ 146.4, 145.9, 139.4, 128.7, 122.2, 77.3, 59.0, 52.5 (MeOH), 38.3, 30.5. <sup>31</sup>P NMR (162 MHz, CDCl<sub>3</sub>) δ 5.3 (s) (methanol in coordination sphere).

### 5.2 Procedure for synthesis of C2 and C3

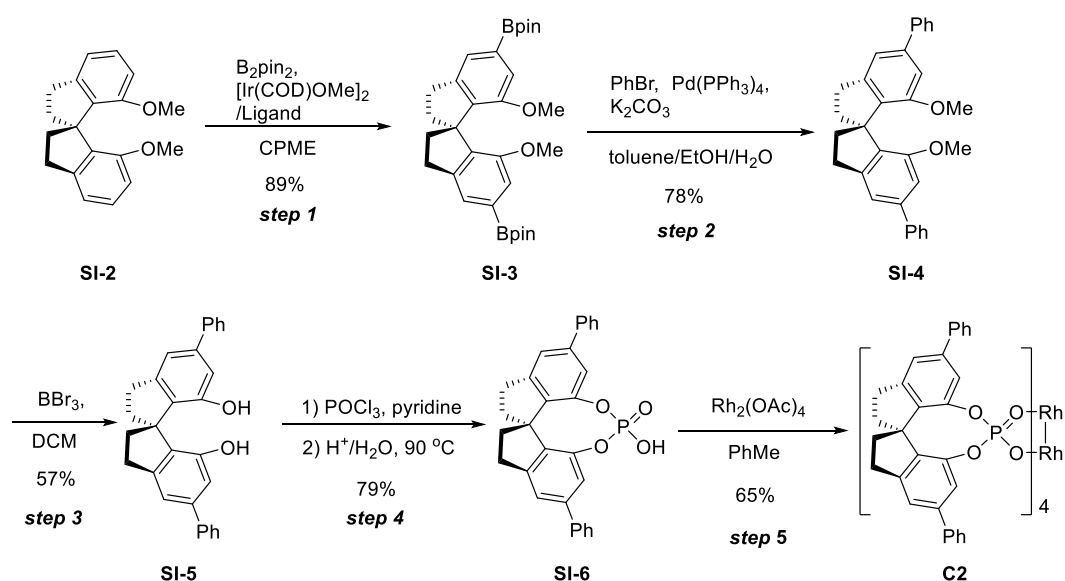

(*S*)-7,7'-dimethoxy-2,2',3,3'-tetrahydro-1,1'-spirobi[indene] (**SI-2**) was prepared from the optically pure (*S*)-SPINOL according to our previously reported procedures.<sup>13</sup>

### Step 1. Synthesis of **SI-3**<sup>14</sup>

According to the reported procedure, in an oven-dried Schlenk tube (120 mL in volume) equipped with a stir bar were placed with **SI-2**, B<sub>2</sub>pin<sub>2</sub> (4.5 g, 17.6 mmol), [Ir(OMe)(cod)]<sub>2</sub> (212 mg, 0.32 mmol) and dipyridinyl tetraaminodiborane (248 mg, 0.64 mmol). After evacuation and refill with dry nitrogen for three times, dry methoxycyclopentane (30 mL) was added with syringe. The resulting mixture was stirred at 110 °C for 36 h. After cooling to room temperature, the reaction mixture was concentrated and the residue was purified by column chromatography on silica gel (eluting with petroleum ether/DCM = 1:1, v/v) to give **SI-3** as a white solid (3.8 g, 89% yield).

### (*S*)-2,2'-(7,7'-dimethoxy-2,2',3,3'-tetrahydro-1,1'-spirobi[indene]-5,5'-diyl)bis(4,4,5,5-tetramethyl-1,3,2-dioxaborolane) (**SI-3**)

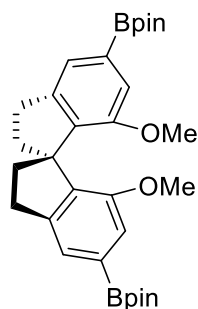

White solid. m.p.: 190–192 °C.  $[\alpha]_D^{25} -34.0$  (c 1.0, CHCl<sub>3</sub>). <sup>1</sup>H NMR (400 MHz, CDCl<sub>3</sub>): δ 7.34 (s, 2H, ArH), 7.04 (s, 2H, ArH), 3.56 (s, 6H, 2OCH<sub>3</sub>), 3.10 – 2.90 (m, 4H, 2CH<sub>2</sub>), 2.33 – 2.25 (m, 2H, CH<sub>2</sub>), 2.16 – 2.10 (m, 2H, CH<sub>2</sub>), 1.34 (s, 24H, 8CH<sub>3</sub>). <sup>13</sup>C NMR (101 MHz, CDCl<sub>3</sub>) δ 156.1, 145.0, 140.5, 123.6, 114.3, 83.6, 59.5, 55.3, 38.5, 31.3, 24.9, 24.9. <sup>11</sup>B NMR (128 MHz, CDCl<sub>3</sub>) δ 33.9. HRMS (ESI) calcd for [C<sub>31</sub>H<sub>42</sub>B<sub>2</sub>O<sub>6</sub>,

$M + Na]^+$ : 555.3065, Found: 555.3070.

### Step 2. Synthesis of SI-4

To a solution of **SI-3** (1.3 g, 2.5 mmol), phenylboronic acid (2.4 g, 15 mmol) and  $Pd(PPh_3)_4$  (433 mg, 0.375 mmol) in toluene (30 mL) and EtOH (14 mL), aqueous  $K_2CO_3$  (1 M, 20 mL) was added. The mixture was degassed by freezing and then heated at reflux for 24 h. The reaction mixture was cooled to ambient temperature and diluted by ethyl acetate. The aqueous layer was extracted with EtOAc ( $3 \times 20$  mL). The combined organic extract was washed with brine, then dried over  $MgSO_4$ , filtered, concentrated. The residue was purified by column chromatography (eluting with petroleum ether/DCM = 4:1, v/v) to give **SI-4** as a white solid (0.8 g, 78% yield).

### (S)-7,7'-dimethoxy-5,5'-diphenyl-2,2',3,3'-tetrahydro-1,1'-spirobi[indene] (SI-4)

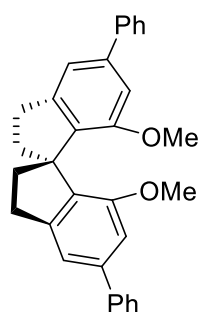

Yield: 78%. White solid. m.p.: 58–60 °C.  $[\alpha]_D^{25} -1.4$  (c 1.0,  $CHCl_3$ ).  $^1H$  NMR (400 MHz,  $CDCl_3$ ):  $\delta$  7.61 (d,  $J = 7.3$  Hz, 4H, ArH), 7.44 – 7.38 (m, 4H, ArH), 7.33 – 7.28 (m, 2H, ArH), 7.10 (s, 2H, ArH), 6.85 (s, 2H, ArH), 3.61 (s, 6H, 2OCH<sub>3</sub>), 3.24 – 2.99 (m, 4H, 2CH<sub>2</sub>), 2.50 – 2.38 (m, 2H, CH<sub>2</sub>), 2.30 – 2.16 (m, 2H, CH<sub>2</sub>).  $^{13}C$  NMR (101 MHz,  $CDCl_3$ )  $\delta$  156.7, 146.0, 142.0, 141.3, 136.1, 128.7, 127.2, 127.0, 115.9, 108.1, 58.9, 55.4, 39.2, 31.8. HRMS (ESI) calcd for  $[C_{31}H_{28}O_2, M + Na]^+$ : 455.1987, Found: 455.1985.

### Step 3. Synthesis of SI-5

To a dried Schlenk tube equipped with septum and stir bar, **SI-4** (850 mg, 2.0 mmol) was added. After three vacuum nitrogen cycles, dry DCM (20 mL) was added by syringe. The solution was cooled to  $-78$  °C, treated with  $BBr_3$  (1 M, 15 mmol) in DCM and allowed to warm to room temperature. After stirring overnight, the reaction mixture was diluted with DCM and washed sequentially with saturated  $NaHCO_3$  and brine. The organic layer was dried over anhydrous  $MgSO_4$  and then concentrated. The residue was purified by column chromatography (eluting with petroleum ether/DCM = 1:1, v/v) to give **SI-5** as a white solid (460 mg, 57% yield).

### (S)-5,5'-diphenyl-2,2',3,3'-tetrahydro-1,1'-spirobi[indene]-7,7'-diol (SI-5)

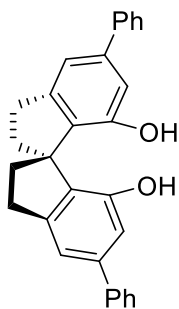

White solid. m.p.: 101–102 °C.  $[\alpha]_{\text{D}}^{25} +40.6$  (c 1.0,  $\text{CHCl}_3$ ).  $^1\text{H}$  NMR (400 MHz,  $\text{CDCl}_3$ ):  $\delta$  7.53 (d,  $J = 7.8$  Hz, 4H, ArH), 7.42 – 7.34 (m, 4H, ArH), 7.34 – 7.26 (m, 2H, ArH), 7.10 (s, 2H, ArH), 6.90 (s, 2H, ArH), 4.85 (s, 2H, 2OH), 3.15 – 2.92 (m, 4H, 2 $\text{CH}_2$ ), 2.39 – 2.14 (m, 4H, 2 $\text{CH}_2$ ).  $^{13}\text{C}$  NMR (101 MHz,  $\text{CDCl}_3$ )  $\delta$  153.0, 146.6, 143.5, 140.9, 129.9, 128.8, 127.5, 127.2, 116.7, 113.4, 57.2, 37.8, 31.4. HRMS (ESI) calcd for  $[\text{C}_{29}\text{H}_{24}\text{O}_2, \text{M} + \text{Na}]^+$ : 427.1674, Found: 427.1673.

#### Step 4. Synthesis of SI-6

To a 50 mL oven-dried Schlenk flask containing **SI-5** (460 mg, 1.2 mmol) was added 4 mL anhydrous pyridine and freshly distilled  $\text{POCl}_3$  (370 mg, 2.4 mmol) under a nitrogen atmosphere. The mixture was stirred under 90 °C for 12 h. After cooling to room temperature, 4 mL of  $\text{H}_2\text{O}$  was added. The mixture was stirred under 90 °C for another 12 h, then cooled by an ice-bath, followed by a slow addition of  $\text{HCl}$  (aq. 3 N, 35 mL). After stirring for 1 h, the mixture was extracted by DCM ( $3 \times 20$  mL). The combined organic layer was concentrated and the residue was purified by column chromatography (eluting first with petroleum ether/EtOAc = 1:1, v/v, then MeOH/DCM = 1:5, v/v) to give 440 mg white solid. The white solid was dissolved with 100 mL DCM, washed with concentrated  $\text{HCl}$  (10 mL). The organic layer was dried by anhydrous  $\text{MgSO}_4$  and then concentrated. The residue was dried under vacuum to give **SI-6** as a white solid (430 mg, 79% yield).

#### (S)-5,5'-Diphenyl-1,1'-spirobiindanyl-7,7'-diyl-hydrogenphosphate (SI-6)

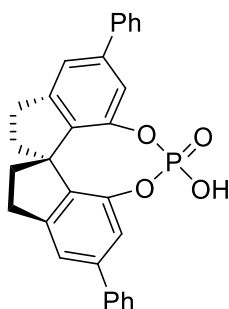

White solid. m.p.: 275–277 °C.  $[\alpha]_{\text{D}}^{25} -396$  (c 1.0,  $\text{CHCl}_3$ ).  $^1\text{H}$  NMR (400 MHz,  $\text{CDCl}_3$ )  $\delta$  12.35 (s, 1H, OH), 7.48 (d,  $J = 7.2$  Hz, 4H, ArH), 7.38 – 7.17 (m, 10H, ArH), 3.20 – 3.05 (m, 2H,  $\text{CH}_2$ ), 2.88 – 2.77 (m, 2H,  $\text{CH}_2$ ), 2.35 – 2.25 (m, 2H,  $\text{CH}_2$ ), 2.15 – 1.92 (m, 2H,  $\text{CH}_2$ ).  $^{13}\text{C}$  NMR (101 MHz,  $\text{CDCl}_3$ )  $\delta$  147.0 (d,  $J = 2.2$  Hz), 145.5 (d,  $J = 7.6$  Hz), 142.3 (d,  $J = 2.0$  Hz), 139.9, 137.9 (d,  $J = 3.6$  Hz), 128.6, 127.3, 127.1, 121.6, 120.1 (d,  $J = 3.3$  Hz), 58.8, 38.4, 30.6.  $^{31}\text{P}$  NMR (162 MHz,  $\text{CDCl}_3$ )  $\delta$  -9.2 (s). HRMS

(ESI) calcd for  $[C_{29}H_{23}O_4P, M + Na]^+$ : 489.1232, Found: 489.1230.

### Step 5. Synthesis of C2

#### tetrakis(*S*)-5,5'-diphenyl-1,1'-spirobiindanyl-7,7'-diyl-phosphate] dirhodium (II) (C2)

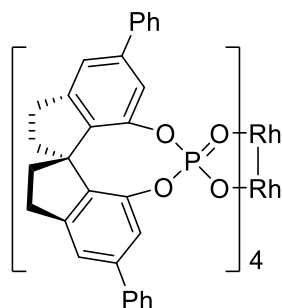

By using the same procedure as for C1. The catalyst C2 was prepared in 65% yield. Green sheet crystal. m.p.: decomposed over 320 °C.  $[\alpha]_D^{25} +289$  (c 1.0, CHCl<sub>3</sub>). <sup>1</sup>H NMR (400 MHz, CDCl<sub>3</sub>) δ 7.64 (s, 8H, ArH), 7.42 – 7.37 (m, 16H, ArH), 7.33 (s, 8H, ArH), 7.22 – 7.13 (m, 24H, ArH), 3.17 – 3.06 (m, 8H, 4CH<sub>2</sub>), 2.94 (s, 3H, H<sub>2</sub>O), 2.92 – 2.80 (m, 8H, 4CH<sub>2</sub>), 2.33 – 2.24 (m, 8H, 4CH<sub>2</sub>), 2.07 – 1.95 (m, 13H, 4CH<sub>2</sub> + (CH<sub>3</sub>)<sub>2</sub>(CO)). <sup>13</sup>C NMR (101 MHz, CDCl<sub>3</sub>) δ 146.6 (p, *J* = 3.3 Hz), 146.3, 141.7, 140.2, 138.4, 128.5, 127.1, 127.0, 120.8, 120.8, 58.6, 38.6, 30.9 ((CH<sub>3</sub>)<sub>2</sub>(CO)), 30.7. <sup>31</sup>P NMR (162 MHz, CDCl<sub>3</sub>) δ 6.6 (s). HRMS (MALDI) calcd for  $[C_{116}H_{88}O_{16}P_4Rh_2, M + Na]^+$ : 2090.3064, Found: 2090.3034.

#### (*S*)-5,5'-bis(3,5-dimethylphenyl)-7,7'-dimethoxy-2,2',3,3'-tetrahydro-1,1'-spirobi[indene] (SI-7)

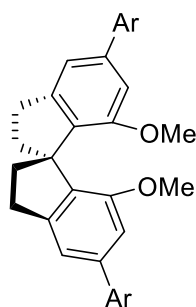

Ar = 3,5-Me<sub>2</sub>C<sub>6</sub>H<sub>3</sub>

By using the same procedure as for SI-4, the SI-7 was prepared in 91% yield. White solid. m.p.: 72–74 °C.  $[\alpha]_D^{25} -10.6$  (c 1.0, CHCl<sub>3</sub>). <sup>1</sup>H NMR (400 MHz, CDCl<sub>3</sub>) δ 7.21 (s, 4H, ArH), 7.07 (s, 2H, ArH), 6.95 (s, 2H, ArH), 6.82 (s, 2H, ArH), 3.59 (s, 6H, 2OCH<sub>3</sub>), 3.18 – 2.96 (m, 4H, 2CH<sub>2</sub>), 2.46 – 2.39 (m, 2H, CH<sub>2</sub>), 2.35 (s, 12H, 4CH<sub>3</sub>), 2.25 – 2.17 (m, 2H, CH<sub>2</sub>). <sup>13</sup>C NMR (101 MHz, CDCl<sub>3</sub>) δ 156.7, 145.9, 142.1, 141.6, 138.1, 136.0, 128.7, 125.3, 115.9, 108.2, 59.0, 55.4, 39.3, 31.9, 21.6. HRMS (ESI) calcd for  $[C_{35}H_{36}O_2, M + Na]^+$ : 511.2613, Found: 511.2610.

#### (*S*)-5,5'-bis(3,5-dimethylphenyl)-2,2',3,3'-tetrahydro-1,1'-spirobi[indene]-7,7'-diol

**(SI-8)**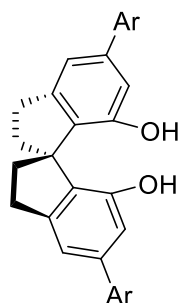

Ar = 3,5-Me<sub>2</sub>C<sub>6</sub>H<sub>3</sub>

By using the same procedure as for **SI-5**, the **SI-8** was prepared in 60% yield. White solid. m.p.: 72–73 °C.  $[\alpha]_D^{25} +35.6$  (c 0.5, CHCl<sub>3</sub>). <sup>1</sup>H NMR (400 MHz, CDCl<sub>3</sub>) δ 7.20 (s, 4H, ArH), 7.12 (s, 2H, ArH), 6.98 (s, 2H, ArH), 6.92 (s, 2H, ArH), 4.74 (s, 2H, 2OH), 3.19 – 2.99 (m, 4H, 2CH<sub>2</sub>), 2.37 (s, 12H, 4CH<sub>3</sub>), 2.36 – 2.18 (m, 4H, 2CH<sub>2</sub>). <sup>13</sup>C NMR (101 MHz, CDCl<sub>3</sub>) δ 152.9, 146.3, 143.7, 140.8, 138.1, 129.3, 129.0, 125.1, 116.6, 113.4, 57.0, 37.7, 31.3, 21.4. HRMS (ESI) calcd for [C<sub>33</sub>H<sub>32</sub>O<sub>2</sub>, M + Na]<sup>+</sup>: 483.2300, Found: 483.2298.

**(S)-5,5'-bis(3,5-dimethylphenyl)-1,1'-spirobiindanyl-7,7'-diyl-hydrogenphosphate**  
**(SI-9)**

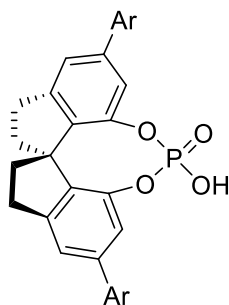

Ar = 3,5-Me<sub>2</sub>C<sub>6</sub>H<sub>3</sub>

By using the same procedure as for **SI-6**, the **SI-9** was prepared in 90% yield. White solid. m.p.: decomposed over 320 °C.  $[\alpha]_D^{25} -382$  (c 0.5, CHCl<sub>3</sub>). <sup>1</sup>H NMR (400 MHz, CDCl<sub>3</sub>) δ 7.40 – 7.23 (m, 4H, ArH), 7.15 (s, 4H, ArH), 6.94 (s, 2H, ArH), 3.21 – 3.08 (m, 2H, CH<sub>2</sub>), 2.93 – 2.81 (m, 2H, CH<sub>2</sub>), 2.41 – 2.21 (m, 14H, CH<sub>2</sub> + 4CH<sub>3</sub>), 2.11 – 2.01 (m, 2H, CH<sub>2</sub>). <sup>13</sup>C NMR (101 MHz, CDCl<sub>3</sub>) δ 146.9, 145.5, 142.8, 140.0, 138.2, 137.8, 129.2, 125.1, 121.7, 120.2, 58.8, 38.6, 30.7, 21.4. <sup>31</sup>P NMR (162 MHz, CDCl<sub>3</sub>) δ –7.3 (s). **HRMS (ESI)** calcd for [C<sub>33</sub>H<sub>31</sub>O<sub>4</sub>P, M + Na]<sup>+</sup>: 545.1858, Found: 545.1856.

**tetrakis[(S)-5,5'-bis(3,5-dimethylphenyl)-1,1'-spirobiindanyl-7,7'-diyl-phosphate]dirhodium (II) (C3)**



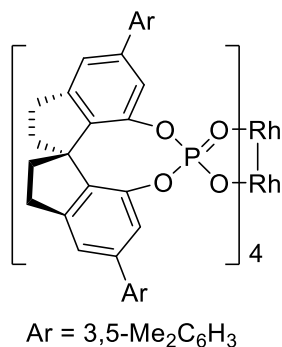

By using the same procedure as for **C1**, the **C3** was prepared in 30% yield. Green crystal. m.p.: decomposed over 320 °C.  $[\alpha]_{\text{D}}^{25} +172$  (c 1.0, CHCl<sub>3</sub>). <sup>1</sup>H NMR (400 MHz, CDCl<sub>3</sub>)  $\delta$  7.42 (s, 8H, ArH), 7.25 (s, 8H, ArH), 7.12 – 7.01 (m, 16H, ArH), 6.84 (s, 8H, ArH), 3.12 – 2.98 (m, 8H, 4CH<sub>2</sub>), 2.83 (s, 2H, H<sub>2</sub>O), 2.81 -2.70 (m, 8H, 4CH<sub>2</sub>), 2.30 – 2.21 (m, 8H, 4CH<sub>2</sub>), 2.15 (s, 48H, 16CH<sub>3</sub>), 2.00 – 1.87 (m, 8H, 4CH<sub>2</sub>). <sup>13</sup>C NMR (101 MHz, CDCl<sub>3</sub>)  $\delta$  146.7, 146.0, 141.6, 140.2, 138.2, 137.9, 128.6, 124.9, 121.1, 120.6, 58.6, 38.6, 30.8, 21.3. <sup>31</sup>P NMR (162 MHz, CDCl<sub>3</sub>)  $\delta$  5.33 (s). HRMS (MALDI) calcd for [C<sub>132</sub>H<sub>120</sub>O<sub>16</sub>P<sub>4</sub>Rh<sub>2</sub>, M + Na]<sup>+</sup>: 2314.5568, Found: 2314.5550.

### 5.3 Procedure for synthesis of **C4** and **C5**

(*S*)-4,4'-dibromo-2,2',3,3'-tetrahydro-1,1'-spirobi[indene]-7,7'-diol (**SI-10**) and (*S*)-4,4'-diphenyl-2,2',3,3'-tetrahydro-1,1'-spirobi[indene]-7,7'-diol (**SI-11**) were prepared from the optically pure (*S*)-SPINOL according to our previously reported procedures.<sup>13</sup>

#### (*S*)-4,4'- dibromo-1,1'-spirobiindanyl-7,7'-diyl-hydrogenphosphate (**SI-12**)

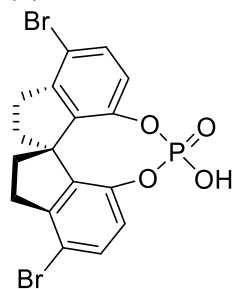

By using the same procedure as for **SI-6**, the **SI-12** was prepared in 80% yield. White solid. m.p.: 186–188 °C.  $[\alpha]_{\text{D}}^{25} -211$  (c 0.5, CHCl<sub>3</sub>). <sup>1</sup>H NMR (400 MHz, CD<sub>3</sub>OD)  $\delta$  7.40 (d, *J* = 8.2 Hz, 2H, ArH), 6.95 (d, *J* = 8.2 Hz, 2H, ArH), 5.02 (s, 1H, OH), 3.31 (s, 1H, CH<sub>3</sub>O), 3.11 – 2.98 (m, 2H, CH<sub>2</sub>), 2.90 – 2.78 (m, 2H, CH<sub>2</sub>), 2.38 – 2.28 (m, 2H, CH<sub>2</sub>), 1.98 – 1.89 (m, 2H, CH<sub>2</sub>). <sup>13</sup>C NMR (101 MHz, CD<sub>3</sub>OD)  $\delta$  147.1 (d, *J* = 7.9 Hz), 145.2 (d, *J* = 2.0 Hz), 141.6 (d, *J* = 3.2 Hz), 130.9 (d, *J* = 2.1 Hz), 124.1 (d, *J* = 3.1 Hz), 115.0 (d, *J* = 3.1 Hz), 61.3, 37.2, 31.6. <sup>31</sup>P NMR (162 MHz, CD<sub>3</sub>OD)  $\delta$  -9.8 (s). HRMS (ESI) calcd for [C<sub>17</sub>H<sub>13</sub>Br<sub>2</sub>O<sub>4</sub>P, M – H]<sup>-</sup>: 470.8819, Found: 470.8830.

#### tetrakis(*S*)-4,4'-dibromo-1,1'-spirobiindanyl-7,7'-diyl-phosphate] dirhodium (II) (**C4**)

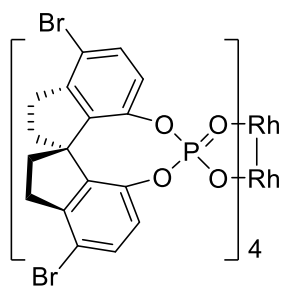

By using the same procedure as for **C1**, the **C4** was prepared in 85% yield. Greyish-green solid. m.p.: decomposed over 320 °C.  $[\alpha]_D^{25} +148$  (c 1.0,  $\text{CHCl}_3$ ).  $^1\text{H}$  NMR (400 MHz,  $\text{CDCl}_3$ )  $\delta$  7.27 (d,  $J = 8.6$  Hz, 8H, ArH), 6.89 (d,  $J = 8.6$  Hz, 8H, ArH), 3.35 (s, 3H,  $\text{CH}_3\text{OH}$ ), 3.04 – 2.95 (m, 8H, 4 $\text{CH}_2$ ), 2.94 – 2.84 (m, 8H, 4 $\text{CH}_2$ ), 2.28 – 2.21 (m, 8H, 4 $\text{CH}_2$ ), 2.02 – 1.92 (m, 8H, 4 $\text{CH}_2$ ).  $^{13}\text{C}$  NMR (101 MHz,  $\text{CDCl}_3$ )  $\delta$  145.8, 145.2 (d,  $J = 3.8$  Hz), 140.6, 132.1, 124.1, 117.1, 61.4, 37.6, 32.1.  $^{31}\text{P}$  NMR (162 MHz,  $\text{CDCl}_3$ ):  $\delta$  4.5 (s). HRMS (MALDI) calcd for  $[\text{C}_{68}\text{H}_{48}\text{Br}_8\text{O}_{16}\text{P}_4\text{Rh}_2, \text{M} + \text{Na}]^+$ : 2112.3286, Found: 2112.3303.

**(S)-4,4'-diphenyl-1,1'-spirobiindanyl-7,7'-diyl-hydrogenphosphate (SI-13)**

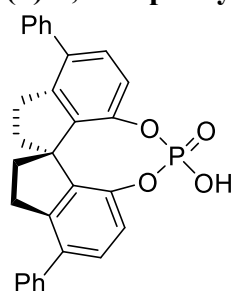

By using the same procedure as for **SI-6**, the **SI-13** was prepared in 84% yield. White solid. m.p.: 209–211 °C.  $[\alpha]_D^{25} -224$  (c 0.5,  $\text{CHCl}_3$ ).  $^1\text{H}$  NMR (400 MHz,  $\text{DMSO-d}_6$ )  $\delta$  7.54 (d,  $J = 7.6$  Hz, 4H, ArH), 7.50 – 7.43 (m, 4H, ArH), 7.39 – 7.34 (m, 2H, ArH), 7.29 (d,  $J = 8.3$  Hz, 2H, ArH), 7.06 (d,  $J = 8.3$  Hz, 2H, ArH), 3.47 – 3.27 (m, 2H,  $\text{CH}_2$ ), 2.72 – 2.62 (m, 2H,  $\text{CH}_2$ ), 2.50 (s, 2H,  $\text{DMSO}$ ), 2.45 – 2.38 (m, 2H,  $\text{CH}_2$ ), 1.92 – 1.82 (m, 2H,  $\text{CH}_2$ ).  $^{13}\text{C}$  NMR (101 MHz,  $\text{DMSO-d}_6$ )  $\delta$  146.1, 143.8, 140.5 (d,  $J = 3.5$  Hz), 140.2, 135.6, 129.0, 128.9, 128.9, 127.6, 122.9, 59.6, 38.6, 30.7.  $^{31}\text{P}$  NMR (162 MHz,  $\text{DMSO-d}_6$ )  $\delta$  -11.2 (s). HRMS (ESI) calcd for  $[\text{C}_{29}\text{H}_{23}\text{O}_4\text{P}, \text{M} + \text{Na}]^+$ : 489.1232, Found: 489.1230.

**tetrakis[(S)-4,4'-diphenyl-1,1'-spirobiindanyl-7,7'-diyl-phosphate] dirhodium (II) (C5)**

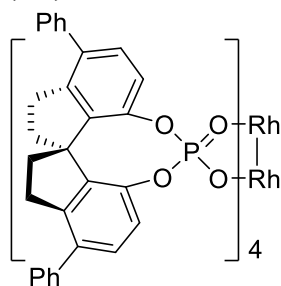

By using the same procedure as for **C1**, the **C5** was prepared in 95% yield. Greyish-

green solid. m.p.: decomposed over 320 °C.  $[\alpha]_{\text{D}}^{25} +143$  (c 1.0,  $\text{CHCl}_3$ ).  $^1\text{H}$  NMR (400 MHz,  $\text{CDCl}_3$ )  $\delta$  7.48 – 7.36 (m, 31H, ArH), 7.35 – 7.27 (m, 16H, ArH), 7.19 (d,  $J = 8.4$  Hz, 9H, ArH), 3.86 (s, 1H, OH), 3.43 (s, 3H,  $\text{CH}_3\text{O}$ ), 3.30 – 3.12 (m, 8H, 4 $\text{CH}_2$ ), 2.81 – 2.71 (m, 8H, 4 $\text{CH}_2$ ), 2.38 – 2.28 (m, 8H, 4 $\text{CH}_2$ ), 2.11 – 1.98 (m, 8H, 4 $\text{CH}_2$ ).  $^{13}\text{C}$  NMR (101 MHz,  $\text{CDCl}_3$ )  $\delta$  145.7, 143.4, 140.4, 139.7, 136.3, 129.5, 128.7, 128.3, 127.0, 122.8, 59.7, 38.3, 30.8.  $^{31}\text{P}$  NMR (162 MHz,  $\text{CDCl}_3$ )  $\delta$  5.9 (s). HRMS (MALDI) calcd for  $[\text{C}_{116}\text{H}_{88}\text{O}_{16}\text{P}_4\text{Rh}_2, \text{M} + \text{Na}]^+$ : 2090.3064, Found: 2090.3030.

## 6. Typical procedure for Si–H bond insertion reaction

### 6.1 General procedure A

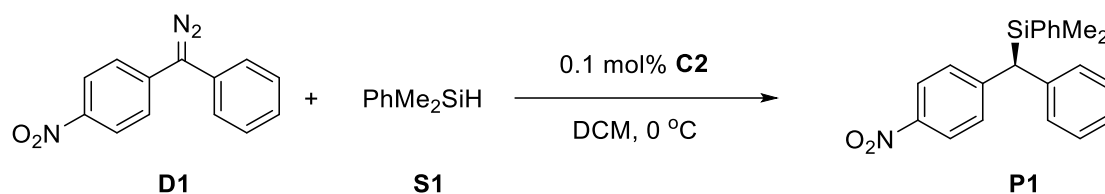

Dimethyl(phenyl)silane **S1** (32.7 mg, 0.24 mmol) and **C2** (0.42 mg, 0.0002 mmol, in 2 mL DCM) was injected into an oven-dried Schlenk tube under argon atmosphere. The mixture was cooled to 0 °C under ice-bath, a solution of **D1** (47.9 mg, 0.2 mmol, in 1 mL DCM) was introduced by syringe in 3 min. The color of diazo compound immediately disappeared after the addition. The TLC showed that the reaction completed as soon as the addition finished. Then the reaction mixture was concentrated and purified by a flash chromatography on silica gel (eluting with petroleum ether/EtOAc = 50:1, v/v) to give **P1** as a colorless oil (64.0 mg, 92% yield).

### 6.2 General procedure B

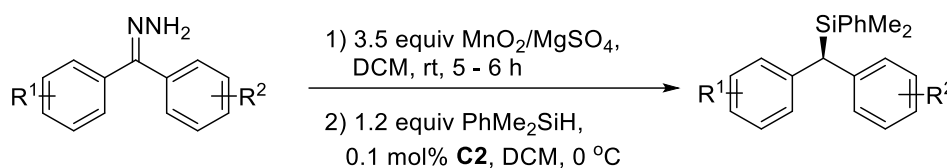

Hydrazone (0.2 mmol, 1 equiv) and anhydrous  $\text{MgSO}_4$  (70 mg, 350 mg/mmol) were placed into an oven-dried Schlenk tube under argon atmosphere and 2 mL DCM was introduced. After cooling to 0 °C, to this rapidly stirring mixture was added activated  $\text{MnO}_2$  (0.7 mmol, 3.5 equiv) in one portion. The reaction mixture was warmed to room temperature and kept stirring for 5-6 h, TLC indicated that the hydrazone was consumed completely. Then the solid was filtered off and washed with anhydrous DCM. The solution was concentrated to 1 mL, and was reacted with silane as in the procedure A.

*Notes: For the Si–H insertion products **P3–P5**, **P9**, **P22–P25** and **P29**, the enantiomeric excesses (*ee*) cannot be directly measured, but determined after converting to the corresponding alcohols.<sup>15</sup>*

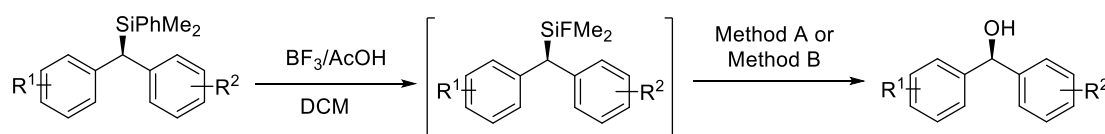

Method A (taking **P3** for example):

The **P3** (68 mg, 0.18 mmol) was added into a 25 mL oven-dried Schlenk tube under argon atmosphere, and 2 mL of DCM was injected. The mixture was cooled to 0 °C under ice-bath, a solution of BF<sub>3</sub>/AcOH (28 μL, 143 μL/mmol) was introduced. The mixture was stirred at reflux for 4 h, and cooled to room temperature and quenched with saturated aqueous NaHCO<sub>3</sub> (2 mL). The mixture was extracted with Et<sub>2</sub>O for three times and the combined organic extract was washed with brine, dried over MgSO<sub>4</sub>, filtered, and concentrated to give a solid.

The solid was dissolved in Et<sub>2</sub>O (2 mL) and was successively added 3-chloroperoxybenzoic acid (155 mg, 0.9 mmol) and triethylamine (20 mg, 0.20 mmol) under ice-bath. The mixture was stirred at room temperature for 20 h and then diluted by Et<sub>2</sub>O (2 mL). The mixture was successively washed by saturated aqueous NaHSO<sub>3</sub> and saturated NaHCO<sub>3</sub>. The water layer was extracted with Et<sub>2</sub>O for three times. The combined extract was washed with brine, dried over MgSO<sub>4</sub>, filtered, and concentrated to give a solid. The crude product was purified by silica gel column chromatography (petroleum ether/EtOAc, 10:1, v/v) to afford alcohol **3ol** (34 mg, 75% yield) as a pale solid.

Method B (taking **P29** for example):

The **P29** (35 mg, 0.1 mmol) was fluorinated and then treated as in Method A. The **P29** was dissolved in THF/MeOH (2 mL, 1:1, v/v), and was successively added KHCO<sub>3</sub> (100 mg, 1.0 mmol, 10 equiv) and KF (58 mg, 1.0 mmol, 10 equiv) under ice-bath. After stirring for several minutes, the mixture was added aqueous H<sub>2</sub>O<sub>2</sub> (30%, 10 equiv). The resulting mixture was stirred at room temperature for 24 h, and extracted with Et<sub>2</sub>O for three times. The combined extract was washed with brine, dried over MgSO<sub>4</sub>, filtered, and concentrated to give a solid. The solid was purified by silica gel column chromatography (eluting with petroleum ether/EtOAc, 10:1, v/v) to afford alcohol **29ol** (10 mg, 45% yield).

## 7. Analytical data of Si-H bond insertion products

### (-)-dimethyl((4-nitrophenyl)(phenyl)methyl)(phenyl)silane (P1)

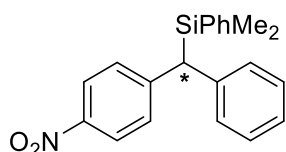

Yield: 92%. Colorless oil.  $[\alpha]_{\text{D}}^{25} -46.6$  (c 1.0,  $\text{CHCl}_3$ ), >99% ee.  $^1\text{H}$  NMR (400 MHz,  $\text{CDCl}_3$ )  $\delta$  8.03 (d,  $J = 8.8$  Hz, 2H), 7.40 – 7.35 (m, 1H), 7.33 – 7.22 (m, 6H), 7.21 – 7.13 (m, 5H), 3.87 (s, 1H), 0.32 (s, 3H), 0.3 (s, 3H).  $^{13}\text{C}$  NMR (101 MHz,  $\text{CDCl}_3$ )  $\delta$  150.7, 145.5, 140.4, 136.2, 134.2, 129.6, 129.1, 128.8, 128.6, 127.8, 126.0, 123.4, 46.6, –3.1, –3.8;  $^{29}\text{Si}$  NMR (79 MHz,  $\text{CDCl}_3$ )  $\delta$  –1.7. HRMS (EI) calcd for  $\text{C}_{21}\text{H}_{21}\text{NO}_2\text{Si}$   $[\text{M}]^+$ : 347.1342; Found 347.1336.

HPLC condition: Chiralpak IC-3 column, n-hexane/2-propanol = 95:5, 1.0 mL/min, 230 nm UV detector,  $t_1 = 7.90$  min (minor) and  $t_2 = 8.51$  min (major).

### (-)-4-((dimethyl(phenyl)silyl)(phenyl)methyl)benzonitrile (P2)

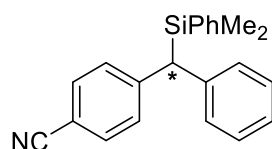

Yield: 96%. Colorless oil.  $[\alpha]_{\text{D}}^{25} -28.4$  (c 1.0,  $\text{CHCl}_3$ ), 98% ee.  $^1\text{H}$  NMR (400 MHz,  $\text{CDCl}_3$ )  $\delta$  7.44 (d,  $J = 8.2$  Hz, 2H), 7.40 – 7.33 (m, 1H), 7.33 – 7.21 (m, 6H), 7.20 – 7.07 (m, 5H), 3.80 (s, 1H), 0.30 (s, 3H), 0.29 (s, 3H).  $^{13}\text{C}$  NMR (101 MHz,  $\text{CDCl}_3$ )  $\delta$  147.3, 139.6, 135.3, 133.3, 130.9, 128.5, 128.1, 128.0, 127.5, 126.7, 124.9, 118.1, 107.7, 45.6, –4.1, –4.7.  $^{29}\text{Si}$  NMR (79 MHz,  $\text{CDCl}_3$ )  $\delta$  –1.8. HRMS (EI) calcd for  $\text{C}_{22}\text{H}_{21}\text{NSi}$   $[\text{M}]^+$ : 327.1443; Found 327.1435.

HPLC condition: Chiralpak IG-3 column, n-hexane/2-propanol = 95:5, 1.0 mL/min, 230 nm UV detector,  $t_1 = 5.27$  min (major) and  $t_2 = 5.84$  min (minor).

### (S)-dimethyl(phenyl)(phenyl(4-(trifluoromethyl)phenyl)methyl)silane (P3)

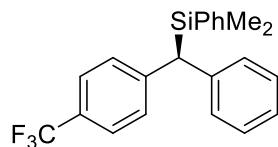

Yield: 91%. Colorless oil.  $[\alpha]_{\text{D}}^{25} -18.4$  (c 1.0,  $\text{CHCl}_3$ ), 95% ee.  $^1\text{H}$  NMR (400 MHz,  $\text{CDCl}_3$ )  $\delta$  7.40 (d,  $J = 8.0$  Hz, 2H), 7.37 – 7.32 (m, 1H), 7.31 – 7.25 (m, 4H), 7.24 – 7.17 (m, 4H), 7.13 – 7.05 (m, 3H), 3.80 (s, 1H), 0.30 (s, 3H), 0.29 (s, 3H).  $^{13}\text{C}$  NMR (101 MHz,  $\text{CDCl}_3$ )  $\delta$  146.7, 141.3, 136.8, 134.4, 129.4, 129.1, 128.8, 128.5, 127.7, 127.4 (q,  $J = 32.0$  Hz), 125.7, 125.1 (q,  $J = 3.6$  Hz), 124.4 (q,  $J = 270.0$  Hz), 46.0, –3.2, –3.4.  $^{19}\text{F}$  NMR (376 MHz,  $\text{CDCl}_3$ )  $\delta$  –62.2 (s, 3F).  $^{29}\text{Si}$  NMR (79 MHz,  $\text{CDCl}_3$ )  $\delta$  –2.4. HRMS (EI) calcd for  $\text{C}_{21}\text{H}_{18}\text{F}_3\text{Si}$   $[\text{M}-\text{CH}_3]^+$ : 355.1130; Found 355.1123.

**P3** was oxidized to alcohol **3ol** via Method A. The enantiomeric excess was determined to be 95% by chiral HPLC analysis. See alcohol **3ol** below.

**(S)-phenyl(4-(trifluoromethyl)phenyl)methanol (3ol)**<sup>16</sup>

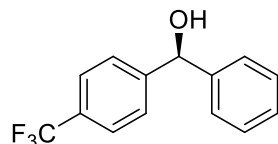

Yield: 75%. <sup>1</sup>H NMR (400 MHz, CDCl<sub>3</sub>) δ 7.58 (d, *J* = 8.1 Hz, 2H), 7.49 (d, *J* = 8.1 Hz, 2H), 7.37 – 7.32 (m, 4H), 7.31 – 7.24 (m, 1H), 5.85 (s, 1H), 2.39 (s, 1H). <sup>13</sup>C NMR (101 MHz, CDCl<sub>3</sub>) δ 147.5, 143.1, 129.7 (q, *J* = 31.6 Hz), 128.8, 128.1, 126.7, 126.6, 125.4 (q, *J* = 4.1 Hz), 124.1 (q, *J* = 270.0 Hz), 75.7. <sup>19</sup>F NMR (376 MHz, CDCl<sub>3</sub>) δ –58.3 (s, 3F).

HPLC condition: Chiralpak IC-3 column, n-hexane/2-propanol = 98:2, 1.0 mL/min, 220 nm UV detector, *t*<sub>1</sub> = 8.34 min (minor) and *t*<sub>2</sub> = 9.04 min (major), 95% ee. [α]<sub>D</sub><sup>25</sup> +31.6 (c 1.0, CHCl<sub>3</sub>) (*lit.* 16 [α]<sub>D</sub><sup>22</sup> +34.3 (c 1.0, CHCl<sub>3</sub>), 92% ee (*S*)).

**(–)-dimethyl(phenyl)(phenyl(4-((trifluoromethyl)thio)phenyl)methyl)silane (P4)**

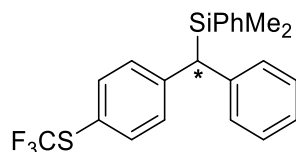

Yield: 68%. Colorless oil. [α]<sub>D</sub><sup>30</sup> –31.0 (c 1.0, CHCl<sub>3</sub>), 97% ee. <sup>1</sup>H NMR (400 MHz, CDCl<sub>3</sub>) δ 7.49 – 7.43 (m, 2H), 7.39 – 7.32 (m, 1H), 7.31 – 7.20 (m, 6H), 7.19 – 7.09 (m, 5H), 3.77 (s, 1H), 0.30 (s, 3H), 0.29 (s, 3H). <sup>13</sup>C NMR (101 MHz, CDCl<sub>3</sub>) δ 145.8, 141.2, 136.7, 136.2, 134.3, 129.8 (q, *J* = 271.0 Hz), 129.6, 129.4, 129.1, 128.4, 127.6, 125.7, 120.4, 45.9, –3.2, –3.6. <sup>19</sup>F NMR (376 MHz, CDCl<sub>3</sub>) δ –43.1 (s, 3F). <sup>29</sup>Si NMR (79 MHz, CDCl<sub>3</sub>) δ –2.6. HRMS (EI) calcd for C<sub>21</sub>H<sub>18</sub>F<sub>3</sub>SSi [M-CH<sub>3</sub>]<sup>+</sup>: 387.0851; Found 387.0845.

**P4** was oxidized to alcohol **4ol** via Method A. The enantiomeric excess was determined to be 97% by chiral HPLC analysis. See alcohol **4ol** below.

**(+)-phenyl(4-((trifluoromethyl)thio)phenyl)methanol (4ol)**<sup>17</sup>

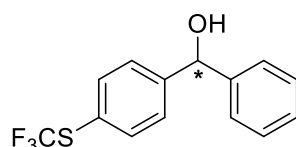

Yield: 41%. <sup>1</sup>H NMR (400 MHz, CDCl<sub>3</sub>) δ 7.60 (d, *J* = 8.1 Hz, 2H), 7.42 (d, *J* = 8.1 Hz, 2H), 7.36 – 7.33 (m, 4H), 7.31 – 7.25 (m, 1H), 5.81 (s, 1H), 2.44 (s, 1H). <sup>13</sup>C NMR (101 MHz, CDCl<sub>3</sub>) δ 146.7, 143.1, 136.4, 129.8 (q, *J* = 262.0 Hz), 128.8, 128.1, 127.5, 126.7, 123.3, 75.7. <sup>19</sup>F NMR (376 MHz, CDCl<sub>3</sub>) δ –53.5 (s, 3F).

HPLC condition: Chiralpak IC-3 column, n-hexane/2-propanol = 99.2:0.8, 0.5 mL/min, 230 nm UV detector,  $t_1 = 10.66$  min (minor) and  $t_2 = 11.00$  min (major), 97% ee.  $[\alpha]_D^{25} +43.2$  (c 0.5,  $\text{CHCl}_3$ ).

**(-)-dimethyl(phenyl)(phenyl(4-(trifluoromethoxy)phenyl)methyl)silane (P5)**

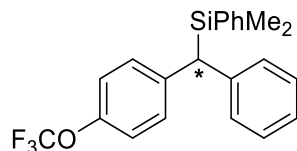

Yield: 66%. Colorless oil.  $[\alpha]_D^{30} -3.2$  (c 1.0,  $\text{CHCl}_3$ ), 76% ee.  $^1\text{H}$  NMR (400 MHz,  $\text{CDCl}_3$ )  $\delta$  7.36 – 7.34 (m, 1H), 7.31 – 7.19 (m, 6H), 7.18 – 7.07 (m, 5H), 7.03 (d,  $J = 8.4$  Hz, 2H), 3.74 (s, 1H), 0.30 (s, 3H), 0.29 (s, 3H).  $^{13}\text{C}$  NMR (101 MHz,  $\text{CDCl}_3$ )  $\delta$  146.9, 141.7, 141.1, 137.0, 134.3, 129.8, 129.3, 128.9, 128.4, 127.6, 125.5, 120.6, 120.6 (q,  $J = 255.0$  Hz), 45.2, -3.2, -3.4.  $^{19}\text{F}$  NMR (376 MHz,  $\text{CDCl}_3$ )  $\delta$  -57.9 (s, 3F).  $^{29}\text{Si}$  NMR (79 MHz,  $\text{CDCl}_3$ )  $\delta$  -2.6. HRMS (EI) calcd for  $\text{C}_{21}\text{H}_{18}\text{F}_3\text{OSi}$   $[\text{M}-\text{CH}_3]^+$ : 371.1079; Found 371.1074.

**P5** was oxidized to alcohol **5ol** via Method A. The enantiomeric excess was determined to be 76% by chiral HPLC analysis. See alcohol **5ol** below.

**(+)-phenyl(4-(trifluoromethoxy)phenyl)methanol (5ol)**<sup>17</sup>

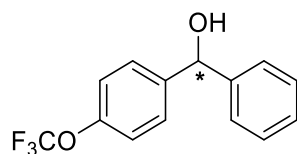

Yield: 40%.  $^1\text{H}$  NMR (400 MHz,  $\text{CDCl}_3$ )  $\delta$  7.37 (d,  $J = 8.2$  Hz, 2H), 7.35 – 7.30 (m, 4H), 7.29 – 7.25 (m, 1H), 7.19 – 7.12 (m, 2H), 5.79 (d,  $J = 3.4$  Hz, 1H), 2.48 (d,  $J = 3.4$  Hz, 1H).  $^{13}\text{C}$  NMR (101 MHz,  $\text{CDCl}_3$ )  $\delta$  148.5, 143.4, 142.4, 128.7, 127.9 (2C signal), 126.6, 121.8, 120.1 (q,  $J = 255.0$  Hz), 75.6.  $^{19}\text{F}$  NMR (376 MHz,  $\text{CDCl}_3$ )  $\delta$  -38.3 (s, 3F).

HPLC condition: Chiralpak IC-3 column, n-hexane/2-propanol = 99.2:0.8, 0.5 mL/min, 230 nm UV detector,  $t_1 = 10.42$  min (minor) and  $t_2 = 10.74$  min (major), 76% ee.  $[\alpha]_D^{25} +12.4$  (c 0.5,  $\text{CHCl}_3$ ).

**(+)-((4-chlorophenyl)(phenyl)methyl)dimethyl(phenyl)silane (P6)**

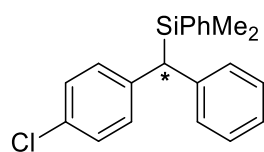

Yield: 95%. Colorless oil.  $[\alpha]_D^{30} +3.0$  (c 1.0,  $\text{CHCl}_3$ ), 66% ee.  $^1\text{H}$  NMR (400 MHz,  $\text{CDCl}_3$ )  $\delta$  7.40 – 7.32 (m, 1H), 7.31 – 7.25 (m, 4H), 7.21 (t,  $J = 8.1$  Hz, 2H), 7.18 – 7.07 (m, 5H), 7.02 (d,  $J = 7.7$  Hz, 2H), 3.70 (s, 1H), 0.29 (s, 3H), 0.28 (s, 3H).  $^{13}\text{C}$  NMR



(101 MHz, CDCl<sub>3</sub>)  $\delta$  141.8, 140.9, 137.1, 134.4, 130.9, 130.1, 129.3, 128.9, 128.3, 128.2, 127.6, 125.4, 45.1, -3.2, -3.4. <sup>29</sup>Si NMR (79 MHz, CDCl<sub>3</sub>)  $\delta$  -2.7. HRMS (EI) calcd for C<sub>21</sub>H<sub>21</sub>ClSi [M]<sup>+</sup>: 336.1101; Found 336.1100.

HPLC condition: phenomenex, Cellulose-3, methanol/2-propanol = 95:5, 1.0 mL/min, 230 nm UV detector, *t*<sub>1</sub> = 4.87 min (major) and *t*<sub>2</sub> = 5.91 min (minor).

**(+)-((4-bromophenyl)(phenyl)methyl)dimethyl(phenyl)silane (P7)**

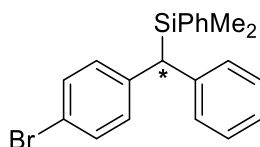

Yield: 79%. Colorless oil. [ $\alpha$ ]<sub>D</sub><sup>28</sup> +3.4 (c 1.0, CHCl<sub>3</sub>), 77% ee. <sup>1</sup>H NMR (400 MHz, CDCl<sub>3</sub>)  $\delta$  7.36 – 7.32 (m, 1H), 7.31 – 7.26 (m, 6H), 7.21 (t, *J* = 7.3 Hz, 2H), 7.16 – 7.07 (m, 3H), 6.97 (d, *J* = 8.1 Hz, 2H), 3.69 (s, 1H), 0.29 (s, 3H), 0.28 (s, 3H). <sup>13</sup>C NMR (101 MHz, CDCl<sub>3</sub>)  $\delta$  141.6, 141.4, 137.0, 134.3, 131.2, 130.5, 129.3, 128.9, 128.3, 127.6, 125.4, 118.9, 45.2, -3.2, -3.4. <sup>29</sup>Si NMR (79 MHz, CDCl<sub>3</sub>)  $\delta$  -2.8. HRMS (EI) calcd for C<sub>21</sub>H<sub>21</sub>BrSi [M]<sup>+</sup>: 380.0596; Found 380.0586.

HPLC condition: phenomenex, Cellulose-3, methanol/2-propanol = 95:5, 1.0 mL/min, 230 nm UV detector, *t*<sub>1</sub> = 5.08 min (major) and *t*<sub>2</sub> = 6.35 min (minor).

**(+)-((4-iodophenyl)(phenyl)methyl)dimethyl(phenyl)silane (P8)**

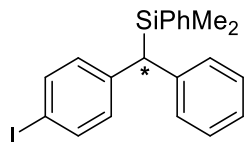

Yield: 62%. Colorless oil. [ $\alpha$ ]<sub>D</sub><sup>28</sup> +21.2 (c 1.0, CHCl<sub>3</sub>), 82% ee. <sup>1</sup>H NMR (400 MHz, CDCl<sub>3</sub>)  $\delta$  7.48 (d, *J* = 8.4 Hz, 2H), 7.39 – 7.32 (m, 1H), 7.32 – 7.24 (m, 4H), 7.24 – 7.17 (m, 2H), 7.16 – 7.05 (m, 3H), 6.84 (d, *J* = 8.4 Hz, 2H), 3.67 (s, 1H), 0.29 (s, 3H), 0.27 (s, 3H). <sup>13</sup>C NMR (101 MHz, CDCl<sub>3</sub>)  $\delta$  142.1, 141.7, 137.2, 137.1, 134.4, 130.9, 129.3, 129.0, 128.4, 127.7, 125.5, 90.2, 45.3, -3.1, -3.3. <sup>29</sup>Si NMR (79 MHz, CDCl<sub>3</sub>)  $\delta$  -2.8. HRMS (EI) calcd for C<sub>20</sub>H<sub>18</sub>ISi [M-CH<sub>3</sub>]<sup>+</sup>: 413.0222; Found 413.0215.

HPLC condition: phenomenex, Cellulose-3, methanol/2-propanol = 95:5, 1.0 mL/min, 230 nm UV detector, *t*<sub>1</sub> = 5.48 min (major) and *t*<sub>2</sub> = 6.41 min (minor).

**(+)-((4-fluorophenyl)(phenyl)methyl)dimethyl(phenyl)silane (P9)**

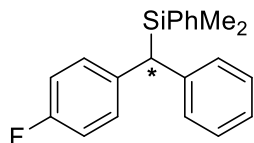

Yield: 88%. Colorless oil. [ $\alpha$ ]<sub>D</sub><sup>27</sup> +1.2 (c 1.0, CHCl<sub>3</sub>), 25% ee. <sup>1</sup>H NMR (400 MHz, CDCl<sub>3</sub>)  $\delta$  7.37 – 7.31 (m, 1H), 7.30 – 7.25 (m, 4H), 7.21 (t, *J* = 7.4 Hz, 2H), 7.16 – 7.01

(m, 5H), 6.88 (t,  $J = 8.7$  Hz, 2H), 3.71 (s, 1H), 0.29 (s, 3H), 0.28 (s, 3H).  $^{13}\text{C}$  NMR (101 MHz,  $\text{CDCl}_3$ )  $\delta$  160.9 (d,  $J = 242.0$  Hz), 142.2, 138.0 (d,  $J = 4.1$  Hz), 137.3, 134.4, 130.2 (d,  $J = 8.6$  Hz), 129.3, 128.9, 128.3, 127.6, 125.4, 115.0 (d,  $J = 21.0$  Hz), 44.9, -3.2, -3.3.  $^{19}\text{F}$  NMR (376 MHz,  $\text{CDCl}_3$ )  $\delta$  -115.6 (s, 1F).  $^{29}\text{Si}$  NMR (79 MHz,  $\text{CDCl}_3$ )  $\delta$  -2.8. HRMS (EI) calcd for  $\text{C}_{20}\text{H}_{18}\text{FSi}$   $[\text{M}-\text{CH}_3]^+$ :305.1162; Found 305.1159.

**P9** was oxidized to alcohol **9ol** via Method A. The enantiomeric excess was determined to be 25% by chiral HPLC analysis. See alcohol **9ol** below.

**(-)-(4-fluorophenyl)(phenyl)methanol (9ol)**<sup>18</sup>

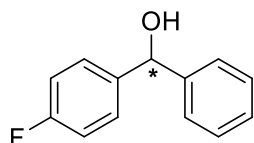

Yield: 57%.  $^1\text{H}$  NMR (400 MHz,  $\text{CDCl}_3$ )  $\delta$  7.40 – 7.23 (m, 7H), 7.01 (t,  $J = 8.6$  Hz, 2H), 5.82 (s, 1H), 2.24 (s, 1H).  $^{13}\text{C}$  NMR (101 MHz,  $\text{CDCl}_3$ )  $\delta$  162.2 (d,  $J = 245.9$  Hz), 143.7, 139.6 (d,  $J = 3.2$  Hz), 128.6, 128.2 (d,  $J = 8.1$  Hz), 127.8, 126.5, 115.3 (d,  $J = 21.3$  Hz), 75.6.  $^{19}\text{F}$  NMR (376 MHz,  $\text{CDCl}_3$ )  $\delta$  -115.1 (s, 1F).

HPLC condition: Chiralpak IB-3 column, n-hexane/2-propanol = 95:5, 1.0 mL/min, 230 nm UV detector,  $t_1 = 10.31$  min (minor) and  $t_2 = 10.78$  min (major), 25% ee.  $[\alpha]_{\text{D}}^{25} -1.8$  (c 1.0,  $\text{CHCl}_3$ ).

**(-)-dimethyl(phenyl)(phenyl(*p*-tolyl)methyl)silane (P10)**

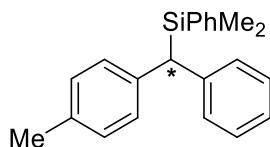

Yield: 51%. Colorless oil.  $[\alpha]_{\text{D}}^{27} -0.02$  (c 1.0,  $\text{CHCl}_3$ ), 18% ee.  $^1\text{H}$  NMR (400 MHz,  $\text{CDCl}_3$ )  $\delta$  7.36 – 7.31 (m, 1H), 7.30 – 7.23 (m, 4H), 7.22 – 7.14 (m, 2H), 7.12 – 7.06 (m, 3H), 7.05 – 6.98 (m, 4H), 3.70 (s, 1H), 2.27 (s, 3H), 0.28 (s, 3H), 0.27 (s, 3H).  $^{13}\text{C}$  NMR (101 MHz,  $\text{CDCl}_3$ )  $\delta$  142.5, 139.1, 137.7, 134.6, 134.4, 129.0, 128.9, 128.9, 128.8, 128.1, 127.5, 125.0, 45.1, 20.9, -3.1, -3.2.  $^{29}\text{Si}$  NMR (79 MHz,  $\text{CDCl}_3$ )  $\delta$  -3.1. HRMS (EI) Calcd for  $\text{C}_{22}\text{H}_{24}\text{Si}$   $[\text{M}]^+$ :316.1647; Found 316.1638.

HPLC condition: phenomenex, Cellulose-3, methanol/2-propanol = 95:5, 1.0 mL/min, 230 nm UV detector,  $t_1 = 5.53$  min (minor) and  $t_2 = 7.53$  min (major).

**(R)-((4-methoxyphenyl)(phenyl)methyl)dimethyl(phenyl)silane (P11)**

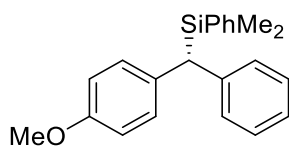

Yield: 47%. Colorless oil.  $[\alpha]_D^{27} -15.8$  (c 1.0,  $\text{CHCl}_3$ ), 64% ee.  $^1\text{H}$  NMR (400 MHz,  $\text{CDCl}_3$ )  $\delta$  7.38 – 7.31 (m, 1H), 7.31 – 7.24 (m, 4H), 7.22 – 7.16 (m, 2H), 7.13 – 7.02 (m, 5H), 6.76 (d,  $J = 8.8$  Hz, 2H), 3.75 (s, 3H), 3.68 (s, 1H), 0.29 (s, 3H), 0.28 (s, 3H).  $^{13}\text{C}$  NMR (101 MHz,  $\text{CDCl}_3$ )  $\delta$  157.3, 142.7, 137.6, 134.4, 134.3, 129.9, 129.0, 128.7, 128.1, 127.5, 125.0, 113.6, 55.2, 44.5, –3.1, –3.2.  $^{29}\text{Si}$  NMR (79 MHz,  $\text{CDCl}_3$ )  $\delta$  –3.1. HRMS (EI) calcd for  $\text{C}_{22}\text{H}_{24}\text{OSi}$   $[\text{M}]^+$ : 332.1596; Found 332.1592.

HPLC condition: Chiralcel AS-3 column, n-hexane/2-propanol = 99.2:0.8, 0.5 mL/min, 230 nm UV detector,  $t_1 = 7.21$  min (minor) and  $t_2 = 7.45$  min (major).

**P11** was oxidized to alcohol **11ol** via Method B. The absolute configuration of **P11** was assigned by **11ol**. See alcohol **11ol** below.

**(R)-(4-methoxyphenyl)(phenyl)methanol (11ol)**<sup>18</sup>

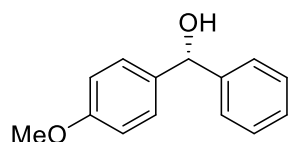

$^1\text{H}$  NMR (400 MHz,  $\text{CDCl}_3$ )  $\delta$  7.45 – 7.17 (m, 7H), 6.84 (d,  $J = 8.6$  Hz, 2H), 5.76 (s, 1H), 3.76 (s, 3H), 2.30 (s, 1H).  $^{13}\text{C}$  NMR (101 MHz,  $\text{CDCl}_3$ )  $\delta$  159.0, 144.0, 136.1, 128.4, 127.9, 127.4, 126.4, 113.8, 75.7, 55.2.

HPLC condition: Chiralpak AD-H column, n-hexane/2-propanol = 90:10, 0.8 mL/min, 230 nm UV detector,  $t_1 = 14.56$  min (major) and  $t_2 = 15.76$  min (minor), 64% ee.  $[\alpha]_D^{25} +4.0$  (c 0.5,  $\text{CHCl}_3$ ) (*lit.* 18  $[\alpha]_D^{23} -14.8$  (c 0.81,  $\text{CHCl}_3$ ), 92% ee (*S*)).

**(–)-4-((dimethyl(phenyl)silyl)(phenyl)methyl)-*N,N*-dimethylaniline (P12)**

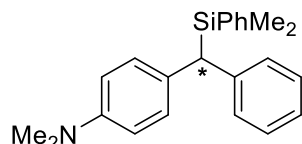

Yield: 45%. Yellow oil.  $[\alpha]_D^{28} -19.6$  (c 0.5,  $\text{CHCl}_3$ ), 91% ee.  $^1\text{H}$  NMR (400 MHz,  $\text{CDCl}_3$ )  $\delta$  7.36 – 7.23 (m, 5H), 7.19 – 7.15 (m, 2H), 7.11 – 6.99 (m, 5H), 6.62 (d,  $J = 8.6$  Hz, 2H), 3.64 (s, 1H), 2.87 (s, 6H), 0.29 (s, 3H), 0.28 (s, 3H).  $^{13}\text{C}$  NMR (101 MHz,  $\text{CDCl}_3$ )  $\delta$  148.5, 143.2, 138.1, 134.4, 130.4, 129.8, 128.9, 128.7, 128.0, 127.4, 124.8, 112.8, 44.2, 40.8, –2.9, –3.2.  $^{29}\text{Si}$  NMR (79 MHz,  $\text{CDCl}_3$ )  $\delta$  –3.0. HRMS (ESI) calcd for  $\text{C}_{23}\text{H}_{27}\text{NSi}$   $[\text{M}+\text{H}]^+$ : 346.1991; Found 346.1988.

HPLC condition: Chiralpak AD-3 column, n-hexane/2-propanol = 99.5:0.5, 0.7 mL/min, 230 nm UV detector,  $t_1 = 6.41$  min (minor) and  $t_2 = 6.64$  min (major).

**(–)-4-((dimethyl(phenyl)silyl)(4-nitrophenyl)methyl)-*N,N*-dimethylaniline (P13)**

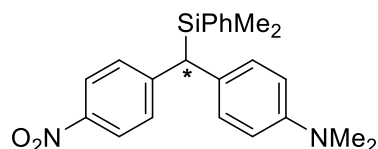

The solution of diazo compound was dropped for 30 min. Yield: 66%. Yellow oil.  $[\alpha]_D^{28} -84.8$  (c 0.5,  $\text{CHCl}_3$ ), 96% ee.  $^1\text{H NMR}$  (400 MHz,  $\text{CDCl}_3$ )  $\delta$  7.92 (d,  $J = 8.7$  Hz, 2H), 7.29 – 7.27 (m, 1H), 7.25 – 7.21 (m, 4H), 7.04 (d,  $J = 8.7$  Hz, 2H), 6.96 (d,  $J = 8.6$  Hz, 2H), 6.58 (d,  $J = 8.6$  Hz, 2H), 3.70 (s, 1H), 2.83 (s, 6H), 0.23 (s, 3H), 0.23 (s, 3H).  $^{13}\text{C NMR}$  (101 MHz,  $\text{CDCl}_3$ )  $\delta$  151.9, 148.8, 145.2, 136.7, 134.3, 130.1, 129.4, 128.6, 128.1, 127.7, 123.2, 112.8, 45.2, 40.6, -2.9, -3.8.  $^{29}\text{Si NMR}$  (79 MHz,  $\text{CDCl}_3$ )  $\delta$  -1.9. HRMS (ESI) calcd for  $\text{C}_{23}\text{H}_{27}\text{N}_2\text{O}_2\text{Si}$   $[\text{M}+\text{H}]^+$ : 391.1842; Found 391.1840.

HPLC condition: Chiralpak AD-3 column, n-hexane/2-propanol = 95:5, 1.0 mL/min, 230 nm UV detector,  $t_1 = 4.73$  min (minor) and  $t_2 = 5.39$  min (major).

**(-)-((4-methoxyphenyl)(4-nitrophenyl)methyl)dimethyl(phenyl)silane (P14)**

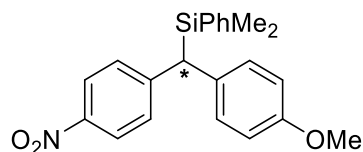

Yield: 78%. Colorless oil.  $[\alpha]_D^{28} -67.6$  (c 1.0,  $\text{CHCl}_3$ ), 99% ee.  $^1\text{H NMR}$  (400 MHz,  $\text{CDCl}_3$ )  $\delta$  8.01 (d,  $J = 8.7$  Hz, 2H), 7.41 – 7.37 (m, 1H), 7.34 – 7.22 (m, 4H), 7.14 (d,  $J = 8.7$  Hz, 2H), 7.08 (d,  $J = 8.6$  Hz, 2H), 6.81 (d,  $J = 8.6$  Hz, 2H), 3.82 (s, 1H), 3.76 (s, 3H), 0.31 (s, 3H), 0.31 (s, 3H).  $^{13}\text{C NMR}$  (101 MHz,  $\text{CDCl}_3$ )  $\delta$  157.8, 151.2, 145.4, 136.3, 134.2, 132.4, 130.2, 129.5, 128.7, 127.7, 123.3, 114.0, 55.2, 45.4, -3.1, -3.8.  $^{29}\text{Si NMR}$  (79 MHz,  $\text{CDCl}_3$ )  $\delta$  -1.9. HRMS (ESI) calcd for  $\text{C}_{22}\text{H}_{23}\text{NO}_3\text{Si}$   $[\text{M}+\text{Na}]^+$ : 400.1345; Found 400.1342.

HPLC condition: Chiralpak IC-3 column, n-hexane/2-propanol = 90:10, 1.0 mL/min, 230 nm UV detector,  $t_1 = 9.20$  min (minor) and  $t_2 = 11.83$  min (major).

**(-)-dimethyl((4-nitrophenyl)(*p*-tolyl)methyl)(phenyl)silane (P15)**

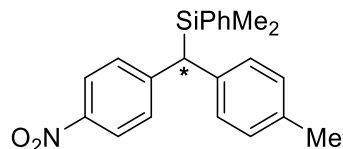

Yield: 87%. Colorless oil.  $[\alpha]_D^{28} -60.6$  (c 1.0,  $\text{CHCl}_3$ ), 99% ee.  $^1\text{H NMR}$  (400 MHz,  $\text{CDCl}_3$ )  $\delta$  8.01 (d,  $J = 8.7$  Hz, 2H), 7.39 – 7.36 (m, 1H), 7.33 – 7.23 (m, 4H), 7.15 (d,  $J = 8.7$  Hz, 2H), 7.11 – 7.01 (m, 4H), 3.83 (s, 1H), 2.30 (s, 3H), 0.31 (s, 3H), 0.30 (s, 3H).  $^{13}\text{C NMR}$  (101 MHz,  $\text{CDCl}_3$ )  $\delta$  151.0, 145.4, 137.3, 136.3, 135.5, 134.2, 129.5, 129.3, 129.1, 128.7, 127.7, 123.3, 46.0, 20.9, -3.1, -3.8.  $^{29}\text{Si NMR}$  (79 MHz,  $\text{CDCl}_3$ )  $\delta$  -1.9. HRMS (ESI) calcd for  $\text{C}_{22}\text{H}_{23}\text{NO}_2\text{Si}$   $[\text{M}+\text{Na}]^+$ : 384.1396; Found 384.1395.

HPLC condition: Chiralpak IC-3 column, n-hexane/2-propanol = 99:1, 1.0 mL/min, 230 nm UV detector,  $t_1 = 8.47$  min (minor) and  $t_2 = 8.89$  min (major).

**(-)-((4-fluorophenyl)(4-nitrophenyl)methyl)dimethyl(phenyl)silane (P16)**

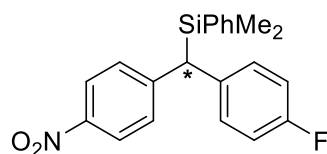

Yield: 86%. Colorless oil.  $[\alpha]_D^{28} -45.6$  (c 1.0,  $\text{CHCl}_3$ ), 98% ee.  $^1\text{H NMR}$  (400 MHz,  $\text{CDCl}_3$ )  $\delta$  8.04 (d,  $J = 8.8$  Hz, 2H), 7.43 – 7.36 (m, 1H), 7.35 – 7.29 (m, 2H), 7.28 – 7.24 (m, 2H), 7.16 (dd,  $J = 9.0, 2.3$  Hz, 2H), 7.13 – 7.06 (m, 2H), 6.96 (t,  $J = 8.6$  Hz, 2H), 3.85 (s, 1H), 0.32 (s, 3H), 0.31 (s, 3H).  $^{13}\text{C NMR}$  (101 MHz,  $\text{CDCl}_3$ )  $\delta$  162.2 (d,  $J = 244.0$  Hz), 150.5, 145.5, 136.2 (d,  $J = 3.6$  Hz), 135.9, 134.2, 130.5 (d,  $J = 8.1$  Hz), 129.7, 128.7, 127.8, 123.5, 115.4 (d,  $J = 21.0$  Hz), 45.6, -3.2, -3.8.  $^{19}\text{F NMR}$  (376 MHz,  $\text{CDCl}_3$ )  $\delta$  -117.0 (s, 1F).  $^{29}\text{Si NMR}$  (79 MHz,  $\text{CDCl}_3$ )  $\delta$  -1.7. HRMS (EI) Calcd for  $\text{C}_{21}\text{H}_{20}\text{FNO}_2\text{Si}$   $[\text{M}]^+$ :365.1247; Found 365.1246.

HPLC condition: Chiralpak IC-3 column, n-hexane/2-propanol = 95:5, 1.0 mL/min, 230 nm UV detector,  $t_1 = 10.37$  min (minor) and  $t_2 = 12.38$  min (major).

**(-)-((4-bromophenyl)(4-nitrophenyl)methyl)dimethyl(phenyl)silane (P17)**

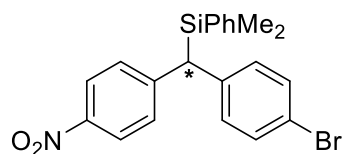

Yield: 80%. Colorless oil.  $[\alpha]_D^{28} -45.6$  (c 1.0,  $\text{CHCl}_3$ ), 95% ee.  $^1\text{H NMR}$  (400 MHz,  $\text{CDCl}_3$ )  $\delta$  8.04 (d,  $J = 8.7$  Hz, 2H), 7.37 (d,  $J = 8.4$  Hz, 3H), 7.31 (t,  $J = 7.4$  Hz, 2H), 7.25 (d,  $J = 6.5$  Hz, 2H), 7.16 (d,  $J = 8.7$  Hz, 2H), 7.01 (d,  $J = 8.4$  Hz, 2H), 3.83 (s, 1H), 0.31 (s, 3H), 0.30 (s, 3H).  $^{13}\text{C NMR}$  (101 MHz,  $\text{CDCl}_3$ )  $\delta$  149.9, 145.6, 139.5, 135.7, 134.2, 131.6, 130.7, 129.8, 128.8, 127.9, 123.5, 119.8, 45.9, -3.3, -3.8.  $^{29}\text{Si NMR}$  (79 MHz,  $\text{CDCl}_3$ )  $\delta$  -1.7. HRMS (EI) Calcd for  $\text{C}_{21}\text{H}_{20}\text{BrNO}_2\text{Si}$   $[\text{M}]^+$ :425.0447; Found 425.0439.

HPLC condition: Chiralpak IC-3 column, n-hexane/2-propanol = 95:5, 1.0 mL/min, 230 nm UV detector,  $t_1 = 8.80$  min (minor) and  $t_2 = 9.53$  min (major).

**(-)-((4-chlorophenyl)(4-nitrophenyl)methyl)dimethyl(phenyl)silane (P18)**

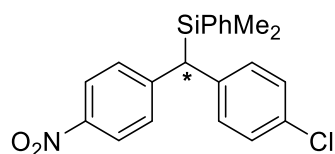

Yield: 88%. Colorless oil.  $[\alpha]_D^{28} -43.8$  (c 1.0,  $\text{CHCl}_3$ ), 96% ee.  $^1\text{H NMR}$  (400 MHz, Chloroform-*d*)  $\delta$  8.04 (d,  $J = 8.7$  Hz, 2H), 7.41 – 7.37 (m, 1H), 7.30 (t,  $J = 7.3$  Hz, 2H), 7.28 – 7.21 (m, 4H), 7.16 (d,  $J = 8.7$  Hz, 2H), 7.07 (d,  $J = 8.4$  Hz, 2H), 3.85 (s, 1H),

0.31 (s, 3H), 0.31 (s, 3H).  $^{13}\text{C}$  NMR (101 MHz,  $\text{CDCl}_3$ )  $\delta$  150.1, 145.6, 139.0, 135.7, 134.2, 131.8, 130.3, 129.7, 128.8, 128.7, 127.8, 123.5, 45.8, -3.3, -3.8.  $^{29}\text{Si}$  NMR (79 MHz,  $\text{CDCl}_3$ )  $\delta$  -1.7. HRMS (EI) Calcd for  $\text{C}_{21}\text{H}_{20}\text{ClNO}_2\text{Si}$   $[\text{M}]^+$ : 381.0952; Found 381.0946.

HPLC condition: Chiralpak IC-3 column, n-hexane/2-propanol = 99:1, 1.0 mL/min, 230 nm UV detector,  $t_1$  = 10.55 min (minor) and  $t_2$  = 11.30 min (major).

**(-)-dimethyl((4-nitrophenyl)(4-(trifluoromethyl)phenyl)methyl)(phenyl)silane (P19)**

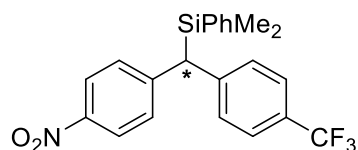

Yield: 58%. Colorless oil.  $[\alpha]_{\text{D}}^{28}$  -17.8 (c 1.0,  $\text{CHCl}_3$ ), 86% ee.  $^1\text{H}$  NMR (400 MHz,  $\text{CDCl}_3$ )  $\delta$  8.07 (d,  $J$  = 8.8 Hz, 2H), 7.55 – 7.47 (m, 2H), 7.44 – 7.38 (m, 1H), 7.35 – 7.29 (m, 2H), 7.27 – 7.17 (m, 6H), 3.94 (s, 1H), 0.33 (s, 3H), 0.32 (s, 3H).  $^{13}\text{C}$  NMR (101 MHz,  $\text{CDCl}_3$ )  $\delta$  149.4, 145.8, 144.7, 135.4, 134.2, 129.9, 129.1, 129.0, 128.2 (q,  $J$  = 32.0 Hz), 127.9, 125.5 (q,  $J$  = 3.7 Hz), 124.0 (q,  $J$  = 238.0 Hz), 123.6, 46.6, -3.4, -3.7.  $^{19}\text{F}$  NMR (376 MHz,  $\text{CDCl}_3$ )  $\delta$  -62.4 (s, 3F).  $^{29}\text{Si}$  NMR (79 MHz,  $\text{CDCl}_3$ )  $\delta$  -1.4. HRMS (EI) Calcd for  $\text{C}_{22}\text{H}_{20}\text{F}_3\text{NO}_2\text{Si}$   $[\text{M}]^+$ : 415.1215; Found 415.1205.

HPLC condition: Chiralpak AS-3 column, n-hexane/2-propanol = 95:5, 1.0 mL/min, 230 nm UV detector,  $t_1$  = 6.04 min (major) and  $t_2$  = 10.23 min (minor).

**(-)-4-((dimethyl(phenyl)silyl)(4-(trifluoromethyl)phenyl)methyl)benzonitrile (P20)**

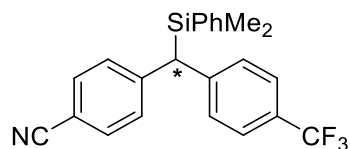

Yield: 42%. Colorless oil.  $[\alpha]_{\text{D}}^{28}$  -2.6 (c 1.0,  $\text{CHCl}_3$ ), 36% ee.  $^1\text{H}$  NMR (400 MHz,  $\text{CDCl}_3$ )  $\delta$  7.50 (d,  $J$  = 8.1 Hz, 4H), 7.44 – 7.36 (m, 1H), 7.31 (t,  $J$  = 7.3 Hz, 2H), 7.25 – 7.18 (m, 4H), 7.16 (d,  $J$  = 8.1 Hz, 2H), 3.86 (s, 1H), 0.31 (s, 3H), 0.31 (s, 3H).  $^{13}\text{C}$  NMR (101 MHz,  $\text{CDCl}_3$ )  $\delta$  147.1, 144.9, 135.6, 134.2, 132.1, 129.8, 129.2, 129.1, 128.1 (q,  $J$  = 32.0 Hz), 127.9, 125.4 (q,  $J$  = 3.4 Hz), 124.3 (q,  $J$  = 271.0 Hz), 118.9, 109.3, 46.7, -3.4, -3.7.  $^{19}\text{F}$  NMR (376 MHz,  $\text{CDCl}_3$ )  $\delta$  -62.9 (s, 3F).  $^{29}\text{Si}$  NMR (79 MHz,  $\text{CDCl}_3$ )  $\delta$  -1.6. HRMS (EI) calcd for  $\text{C}_{23}\text{H}_{20}\text{F}_3\text{NSi}$   $[\text{M}]^+$ : 395.1317; Found 395.1307.

HPLC condition: Chiralpak AS-3 column, n-hexane/2-propanol = 95:5, 1.0 mL/min, 230 nm UV detector,  $t_1$  = 7.29 min (major) and  $t_2$  = 7.88 min (minor).

**(-)-((4-methoxyphenyl)(4-(trifluoromethyl)phenyl)methyl)dimethyl(phenyl)silane (P21)**

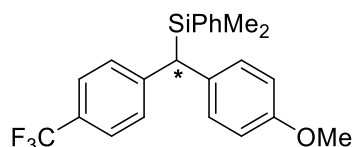

Yield: 78%. Colorless oil.  $[\alpha]_D^{30}$   $-36.8$  (c 1.0,  $\text{CHCl}_3$ ), 98% ee.  $^1\text{H}$  NMR (400 MHz,  $\text{CDCl}_3$ )  $\delta$  7.42 (d,  $J = 8.0$  Hz, 2H), 7.38 – 7.35 (m, 1H), 7.33 – 7.25 (m, 4H), 7.15 (d,  $J = 8.0$  Hz, 2H), 7.06 (d,  $J = 8.6$  Hz, 2H), 6.78 (d,  $J = 8.6$  Hz, 2H), 3.76 (s, 3H), 3.75 (s, 1H), 0.29 (s, 3H), 0.29 (s, 3H).  $^{13}\text{C}$  NMR (101 MHz,  $\text{CDCl}_3$ )  $\delta$  157.7, 147.2, 137.0, 134.4, 133.3, 130.1, 129.4, 128.6, 127.7, 127.2 (q,  $J = 32.0$  Hz), 125.0 (q,  $J = 4.2$  Hz), 124.5 (q,  $J = 270.0$  Hz), 113.9, 55.2, 44.8,  $-3.1$ ,  $-3.5$ .  $^{19}\text{F}$  NMR (376 MHz,  $\text{CDCl}_3$ )  $\delta$   $-62.1$  (s, 3F).  $^{29}\text{Si}$  NMR (79 MHz,  $\text{CDCl}_3$ )  $\delta$   $-2.6$ . HRMS (EI) calcd for  $\text{C}_{23}\text{H}_{23}\text{F}_3\text{OSi}$   $[\text{M}]^+$ : 400.1470; Found 400.1460.

HPLC condition: Chiralpak AD-3 column, n-hexane/2-propanol = 99:1, 1.0 mL/min, 230 nm UV detector,  $t_1 = 4.06$  min (minor) and  $t_2 = 4.30$  min (major).

**(S)-dimethyl(phenyl)(p-tolyl(4-(trifluoromethyl)phenyl)methyl)silane (P22)**

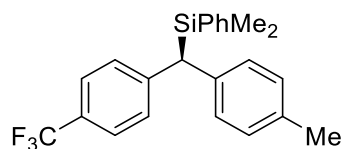

Yield: 85%. Colorless oil.  $[\alpha]_D^{30}$   $-31.0$  (c 1.0,  $\text{CHCl}_3$ ), 94% ee.  $^1\text{H}$  NMR (400 MHz,  $\text{CDCl}_3$ )  $\delta$  7.41 (d,  $J = 8.1$  Hz, 2H), 7.37 – 7.33 (m, 1H), 7.32 – 7.26 (m, 4H), 7.16 (d,  $J = 8.1$  Hz, 2H), 7.04 (s, 4H), 3.76 (s, 1H), 2.28 (s, 3H), 0.30 (s, 3H), 0.29 (s, 3H).  $^{13}\text{C}$  NMR (101 MHz,  $\text{CDCl}_3$ )  $\delta$  146.9 (q,  $J = 1.2$  Hz), 138.1, 136.9, 135.1, 134.3, 129.3, 129.1, 129.0, 128.7, 127.7, 127.2 (q,  $J = 32.0$  Hz), 125.0 (q,  $J = 3.9$  Hz), 124.9 (q,  $J = 271.0$  Hz), 45.4, 20.9,  $-3.1$ ,  $-3.5$ .  $^{19}\text{F}$  NMR (376 MHz,  $\text{CDCl}_3$ )  $\delta$   $-62.1$  (s, 3F).  $^{29}\text{Si}$  NMR (79 MHz,  $\text{CDCl}_3$ )  $\delta$   $-2.6$ . HRMS (EI) calcd for  $\text{C}_{22}\text{H}_{20}\text{F}_3\text{Si}$   $[\text{M}-\text{CH}_3]^+$ : 369.1286; Found 369.1275.

**P22** was oxidized to alcohol **22ol** via Method A. The enantiomeric excess was determined to be 94% by chiral HPLC analysis. See alcohol **22ol** below.

**(S)-p-tolyl(4-(trifluoromethyl)phenyl)methanol (22ol)<sup>19</sup>**

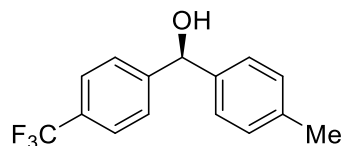

Yield: 46%.  $^1\text{H}$  NMR (400 MHz,  $\text{CDCl}_3$ )  $\delta$  7.60 (d,  $J = 8.2$  Hz, 2H), 7.52 (d,  $J = 8.2$  Hz, 2H), 7.25 (d,  $J = 8.0$  Hz, 2H), 7.18 (d,  $J = 8.0$  Hz, 2H), 5.85 (d,  $J = 3.2$  Hz, 1H), 2.40 (d,  $J = 3.2$  Hz, 1H), 2.36 (s, 3H).  $^{13}\text{C}$  NMR (101 MHz,  $\text{CDCl}_3$ )  $\delta$  147.7, 140.3, 137.9, 129.5 (q,  $J = 33.0$  Hz), 129.5, 126.6, 126.6, 125.4 (q,  $J = 4.0$  Hz), 124.2 (q,  $J = 271.0$  Hz), 75.6, 21.1.  $^{19}\text{F}$  NMR (376 MHz,  $\text{CDCl}_3$ )  $\delta$   $-58.0$  (s, 3F).

HPLC condition: Chiralpak IC-3 column, n-hexane/2-propanol = 95:5, 1.0 mL/min, 230 nm UV detector,  $t_1 = 5.20$  min (minor) and  $t_2 = 5.57$  min (major), 94% ee.  $[\alpha]_D^{25} +33.2$  (c 0.5, CHCl<sub>3</sub>). (*lit.* 19  $[\alpha]_D + 40.6$  (c 0.4, C<sub>6</sub>H<sub>6</sub>), 95% ee (S)).

**(-)-((4-fluorophenyl)(4-(trifluoromethyl)phenyl)methyl)dimethyl(phenyl)silane (P23)**

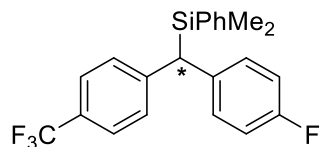

Yield: 63%. Colorless oil.  $[\alpha]_D^{28} -25.0$  (c 1.0, CHCl<sub>3</sub>), 92% ee. <sup>1</sup>H NMR (400 MHz, CDCl<sub>3</sub>)  $\delta$  7.45 (d,  $J = 8.1$  Hz, 2H), 7.37 (t,  $J = 7.1$  Hz, 1H), 7.34 – 7.22 (m, 4H), 7.16 (d,  $J = 8.1$  Hz, 2H), 7.07 (dd,  $J = 8.5, 5.4$  Hz, 2H), 6.92 (t,  $J = 8.7$  Hz, 2H), 3.78 (s, 1H), 0.30 (s, 3H), 0.30 (s, 3H). <sup>13</sup>C NMR (101 MHz, CDCl<sub>3</sub>)  $\delta$  161.1 (d,  $J = 243.0$  Hz), 146.5, 136.9 (d,  $J = 3.3$  Hz), 136.5, 134.3, 130.3 (d,  $J = 7.6$  Hz), 129.5, 128.7, 128.2 (q,  $J = 40.0$  Hz), 127.8, 125.1 (q,  $J = 3.5$  Hz), 124.3 (q,  $J = 270.0$  Hz), 115.2 (d,  $J = 21.0$  Hz), 45.0, -3.3, -3.5. <sup>19</sup>F NMR (376 MHz, CDCl<sub>3</sub>)  $\delta$  -62.1 (s, 3F), -117.8 (s, 1F). <sup>29</sup>Si NMR (79 MHz, CDCl<sub>3</sub>)  $\delta$  -2.2. HRMS (EI) calcd for C<sub>21</sub>H<sub>17</sub>F<sub>4</sub>Si [M-CH<sub>3</sub>]<sup>+</sup>: 373.1036; Found 373.1034.

**P23** was oxidized to alcohol **23ol** via Method A. The enantiomeric excess was determined to be 92% by chiral HPLC analysis. See alcohol **23ol** below.

**(+)-(4-fluorophenyl)(4-(trifluoromethyl)phenyl)methanol (23ol)<sup>20</sup>**

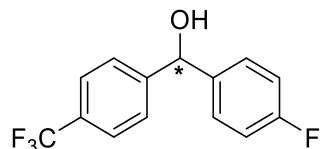

Yield: 44%. <sup>1</sup>H NMR (400 MHz, CDCl<sub>3</sub>)  $\delta$  7.60 (d,  $J = 8.1$  Hz, 2H), 7.48 (d,  $J = 8.1$  Hz, 2H), 7.35 – 7.28 (m, 2H), 7.08 – 6.97 (m, 2H), 5.84 (s, 1H), 2.48 (s, 1H). <sup>13</sup>C NMR (101 MHz, CDCl<sub>3</sub>)  $\delta$  162.4 (d,  $J = 246.7$  Hz), 147.3, 138.9 (d,  $J = 2.9$  Hz), 129.8 (q,  $J = 32.0$  Hz), 128.4 (d,  $J = 7.7$  Hz), 126.6, 125.5 (q,  $J = 4.2$  Hz), 124.1 (q,  $J = 271.0$  Hz), 115.6 (d,  $J = 21.5$  Hz), 75.1. <sup>19</sup>F NMR (376 MHz, CDCl<sub>3</sub>)  $\delta$  -58.1 (s, 3F), -109.7 (s, 1F).

HPLC condition: Chiralpak IC-3 column, n-hexane/2-propanol = 99.2:0.8, 0.5 mL/min, 230 nm UV detector,  $t_1 = 9.60$  min (minor) and  $t_2 = 9.96$  min (major), 92% ee.  $[\alpha]_D^{25} +26.0$  (c 0.5, CHCl<sub>3</sub>).

**(-)-((4-bromophenyl)(4-(trifluoromethyl)phenyl)methyl)dimethyl(phenyl)silane (P24)**



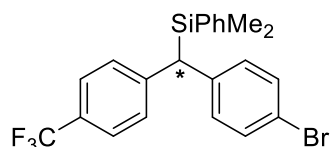

Yield: 71%. Colorless oil.  $[\alpha]_D^{28}$   $-16.2$  (c 1.0,  $\text{CHCl}_3$ ), 67% ee.  $^1\text{H}$  NMR (400 MHz,  $\text{CDCl}_3$ )  $\delta$  7.45 (d,  $J = 8.2$  Hz, 2H), 7.41 – 7.23 (m, 7H), 7.16 (d,  $J = 8.2$  Hz, 2H), 6.98 (d,  $J = 8.4$  Hz, 2H), 3.75 (s, 1H), 0.30 (s, 3H), 0.29 (s, 3H).  $^{13}\text{C}$  NMR (101 MHz,  $\text{CDCl}_3$ )  $\delta$  146.0, 140.3, 136.2, 134.3, 131.4, 130.6, 129.6, 128.8, 127.8, 127.6 (q,  $J = 32.0$  Hz), 125.2 (q,  $J = 4.2$  Hz), 124.3 (q,  $J = 270.0$  Hz), 119.4, 45.4,  $-3.4$ ,  $-3.5$ .  $^{19}\text{F}$  NMR (376 MHz,  $\text{CDCl}_3$ )  $\delta$   $-62.4$  (s, 3F).  $^{29}\text{Si}$  NMR (79 MHz,  $\text{CDCl}_3$ )  $\delta$   $-2.3$ . HRMS (EI) calcd for  $\text{C}_{21}\text{H}_{17}\text{BrF}_3\text{Si}$   $[\text{M}-\text{CH}_3]^+$ : 433.0235; Found 433.0232.

**P24** was oxidized to alcohol **24ol** via Method A. The enantiomeric excess was determined to be 67% by chiral HPLC analysis. See alcohol **24ol** below.

**(+)-(4-bromophenyl)(4-(trifluoromethyl)phenyl)methanol (24ol)<sup>21</sup>**

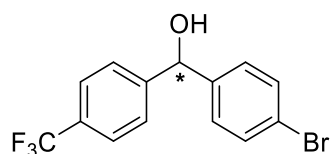

Yield: 32%.  $^1\text{H}$  NMR (400 MHz,  $\text{CDCl}_3$ )  $\delta$  7.59 (d,  $J = 8.2$  Hz, 2H), 7.51 – 7.42 (m, 4H), 7.22 (d,  $J = 8.2$  Hz, 2H), 5.81 (d,  $J = 3.0$  Hz, 1H), 2.41 (d,  $J = 3.0$  Hz, 1H).  $^{13}\text{C}$  NMR (101 MHz,  $\text{CDCl}_3$ )  $\delta$  147.0, 142.0, 131.9, 130.0 (q,  $J = 33.0$  Hz), 128.3, 126.7, 125.6 (q,  $J = 3.6$  Hz), 124.0 (q,  $J = 270.0$  Hz), 122.0, 75.1.  $^{19}\text{F}$  NMR (376 MHz,  $\text{CDCl}_3$ )  $\delta$   $-58.2$  (s, 3F).

HPLC condition: Chiralpak IC-3 column, n-hexane/2-propanol = 95:5, 1.0 mL/min, 230 nm UV detector,  $t_1 = 10.60$  min (minor) and  $t_2 = 11.15$  min (major), 67% ee.  $[\alpha]_D^{25}$   $+7.6$  (c 0.5,  $\text{CHCl}_3$ ).

**(R)-((4-chlorophenyl)(4-(trifluoromethyl)phenyl)methyl)dimethyl(phenyl)silane (P25)**

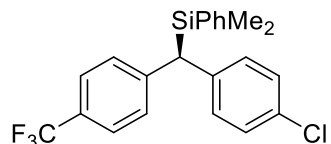

Yield: 73%. Colorless oil.  $[\alpha]_D^{28}$   $-18.2$  (c 1.0,  $\text{CHCl}_3$ ), 76% ee.  $^1\text{H}$  NMR (400 MHz,  $\text{CDCl}_3$ )  $\delta$  7.45 (d,  $J = 8.1$  Hz, 2H), 7.40 – 7.35 (m, 1H), 7.33 – 7.24 (m, 4H), 7.22 – 7.13 (m, 4H), 7.03 (d,  $J = 8.8$  Hz, 2H), 3.77 (s, 1H), 0.30 (s, 3H), 0.29 (s, 3H).  $^{13}\text{C}$  NMR (101 MHz,  $\text{CDCl}_3$ )  $\delta$  146.1, 139.8, 136.3, 134.3, 131.4, 130.2, 129.6, 128.8, 128.5, 127.8, 126.5 (q,  $J = 32.0$  Hz), 125.2 (q,  $J = 3.7$  Hz), 124.3 (q,  $J = 270.0$  Hz), 45.3,  $-3.4$ ,  $-3.5$ .  $^{19}\text{F}$  NMR (376 MHz,  $\text{CDCl}_3$ )  $\delta$   $-62.3$  (s, 3F).  $^{29}\text{Si}$  NMR (79 MHz,  $\text{CDCl}_3$ )  $\delta$   $-2.2$ . HRMS (EI) calcd for  $\text{C}_{21}\text{H}_{17}\text{ClF}_3\text{Si}$   $[\text{M}-\text{CH}_3]^+$ : 389.0740; Found 389.0740.

**P25** was oxidized to alcohol **25ol** via Method A. The enantiomeric excess was determined to be 76% by chiral HPLC analysis. See alcohol **25ol** below.

**(R)-(4-chlorophenyl)(4-(trifluoromethyl)phenyl)methanol (25ol)<sup>6</sup>**

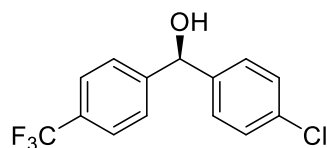

Yield: 40%. <sup>1</sup>H NMR (400 MHz, CDCl<sub>3</sub>) δ 7.59 (d, *J* = 8.2 Hz, 2H), 7.46 (d, *J* = 8.2 Hz, 2H), 7.34 – 7.22 (m, 4H), 5.83 (s, 1H), 2.39 (s, 1H). <sup>13</sup>C NMR (101 MHz, CDCl<sub>3</sub>) δ 147.1, 141.5, 133.9, 130.0 (q, *J* = 32.4 Hz), 128.9, 128.0, 126.7, 125.6 (q, *J* = 3.5 Hz), 124.0 (q, *J* = 271.0 Hz), 75.1. <sup>19</sup>F NMR (376 MHz, CDCl<sub>3</sub>) δ –58.1 (s, 3F).

HPLC condition: Chiralcel IB-3 column, n-hexane/2-propanol = 95:5, 1.0 mL/min, 230 nm UV detector, *t*<sub>1</sub> = 9.67 min (minor) and *t*<sub>2</sub> = 10.31 min (major), 76% ee. [α]<sub>D</sub><sup>25</sup> +10.8 (c 0.5, CHCl<sub>3</sub>). (*lit.* *6* [α]<sub>D</sub> –27.1 (c 2.3, C<sub>6</sub>H<sub>6</sub>), 96% ee (*S*)).

**(–)-((4-methoxyphenyl)(4-(trifluoromethoxy)phenyl)methyl)dimethyl(phenyl)silane (P26)**

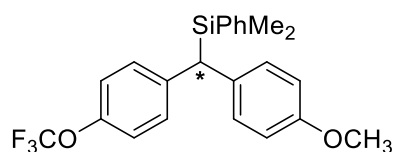

Yield: 58%. Colorless oil. [α]<sub>D</sub><sup>28</sup> –46.8 (c 1.0, CHCl<sub>3</sub>), 93% ee. <sup>1</sup>H NMR (400 MHz, CDCl<sub>3</sub>) δ 7.34 (m, 1H), 7.32 – 7.24 (m, 4H), 7.10 – 6.99 (m, 6H), 6.78 (d, *J* = 8.7 Hz, 2H), 3.75 (s, 3H), 3.68 (s, 1H), 0.29 (s, 3H), 0.29 (s, 3H). <sup>13</sup>C NMR (101 MHz, CDCl<sub>3</sub>) δ 157.5, 146.8, 141.6, 137.1, 134.3, 133.7, 130.0, 129.6, 129.2, 127.6, 120.6, 120.5 (q, *J* = 255.0 Hz), 113.8, 55.2, 44.0, –3.2, –3.5. <sup>19</sup>F NMR (376 MHz, CDCl<sub>3</sub>) δ –58.2 (s, 3F). <sup>29</sup>Si NMR (79 MHz, CDCl<sub>3</sub>) δ –3.0. **HRMS (EI)** calcd for C<sub>23</sub>H<sub>23</sub>F<sub>3</sub>O<sub>2</sub>Si [M]<sup>+</sup>: 416.1419; Found 416.1411.

HPLC condition: Chiralpak AD-3 column, n-hexane/2-propanol = 99.5:0.5, 0.5 mL/min, 230 nm UV detector, *t*<sub>1</sub> = 8.47 min (minor) and *t*<sub>2</sub> = 8.83 min (major).

**(–)-((4-bromophenyl)(4-methoxyphenyl)methyl)dimethyl(phenyl)silane (P27)**

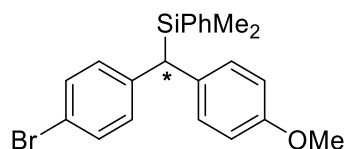

Yield: 58%. Colorless oil. [α]<sub>D</sub><sup>28</sup> –13.4 (c 1.0, CHCl<sub>3</sub>), 94% ee. <sup>1</sup>H NMR (400 MHz, CDCl<sub>3</sub>) δ 7.35 (m, 1H), 7.32 – 7.24 (m, 6H), 7.02 (d, *J* = 8.4 Hz, 2H), 6.93 (d, *J* = 8.2 Hz, 2H), 6.76 (d, *J* = 8.8 Hz, 2H), 3.75 (s, 3H), 3.63 (s, 1H), 0.28 (s, 3H), 0.28 (s, 3H). <sup>13</sup>C NMR (101 MHz, CDCl<sub>3</sub>) δ 157.4, 141.9, 137.2, 134.4, 133.7, 131.1, 130.3, 129.9,

129.2, 127.6, 118.7, 113.7, 55.2, 44.0, -3.1, -3.4.  $^{29}\text{Si}$  NMR (79 MHz,  $\text{CDCl}_3$ )  $\delta$  -3.0. HRMS (EI) calcd for  $\text{C}_{22}\text{H}_{23}\text{BrOSi}$   $[\text{M}]^+$ : 410.0702; Found 410.0694.

HPLC condition: Chiralpak AD-3 column, n-hexane/2-propanol = 99:1, 1.0 mL/min, 230 nm UV detector,  $t_1$  = 4.56 min (minor) and  $t_2$  = 4.82 min (major).

**(-)-((4-chlorophenyl)(4-methoxyphenyl)methyl)dimethyl(phenyl)silane (P28)**

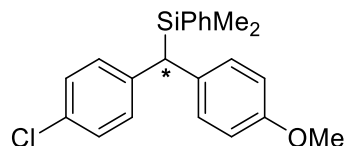

Yield: 59%. Colorless oil.  $[\alpha]_{\text{D}}^{28}$  -17.0 (c 1.0,  $\text{CHCl}_3$ ), 93% ee.  $^1\text{H}$  NMR (400 MHz,  $\text{CDCl}_3$ )  $\delta$  7.37 – 7.34 (m, 1H), 7.31 – 7.28 (m, 4H), 7.14 (d,  $J$  = 8.4 Hz, 2H), 7.00 (dd,  $J$  = 15.7, 6.8 Hz, 4H), 6.76 (d,  $J$  = 7.0 Hz, 2H), 3.75 (s, 3H), 3.65 (s, 1H), 0.28 (s, 3H), 0.28 (s, 3H).  $^{13}\text{C}$  NMR (101 MHz,  $\text{CDCl}_3$ )  $\delta$  157.4, 141.3, 137.2, 134.3, 133.8, 130.7, 129.9, 129.9, 129.2, 128.2, 127.6, 113.7, 55.2, 43.9, -3.2, -3.4.  $^{29}\text{Si}$  NMR (79 MHz,  $\text{CDCl}_3$ )  $\delta$  -3.0. HRMS (EI) calcd for  $\text{C}_{22}\text{H}_{23}\text{ClOSi}$   $[\text{M}]^+$ : 366.1207; Found 366.1196.

HPLC condition: Chiralpak AS-3 column, n-hexane/2-propanol = 99.2:0.8, 0.8 mL/min, 230 nm UV detector,  $t_1$  = 5.02 min (minor) and  $t_2$  = 5.31 min (major).

**(R)-((4-fluorophenyl)(4-methoxyphenyl)methyl)dimethyl(phenyl)silane (P29)**

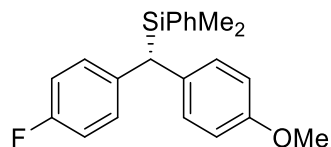

Yield: 43%. Colorless oil.  $[\alpha]_{\text{D}}^{30}$  -34.0 (c 1.0,  $\text{CHCl}_3$ ), 77% ee.  $^1\text{H}$  NMR (400 MHz,  $\text{CDCl}_3$ )  $\delta$  7.38 – 7.32 (m, 1H), 7.29 – 7.26 (m, 4H), 7.05 – 6.98 (m, 4H), 6.87 (t,  $J$  = 8.7 Hz, 2H), 6.80 – 6.72 (m, 2H), 3.75 (s, 3H), 3.65 (s, 1H), 0.28 (s, 3H), 0.28 (s, 3H).  $^{13}\text{C}$  NMR (101 MHz,  $\text{CDCl}_3$ )  $\delta$  160.8 (d,  $J$  = 242.0 Hz), 157.4, 138.4 (d,  $J$  = 4.1 Hz), 137.4, 134.4, 134.2, 129.9 (d,  $J$  = 7.6 Hz), 129.8, 129.1, 127.6, 114.8 (d,  $J$  = 21.0 Hz), 113.7, 55.2, 43.6, -3.2, -3.4.  $^{19}\text{F}$  NMR (376 MHz,  $\text{CDCl}_3$ )  $\delta$  -119.0 (s, 1F).  $^{29}\text{Si}$  NMR (79 MHz,  $\text{CDCl}_3$ )  $\delta$  -3.0. HRMS (EI) calcd for  $\text{C}_{22}\text{H}_{23}\text{FOSi}$   $[\text{M}]^+$ : 350.1502; Found 350.1494.

**P29** was oxidized to alcohol **29ol** via Method B. The enantiomeric excess was determined to be 77% by chiral HPLC analysis. See alcohol **29ol** below.

**(R)-((4-fluorophenyl)(4-methoxyphenyl)methanol (29ol)<sup>22</sup>**

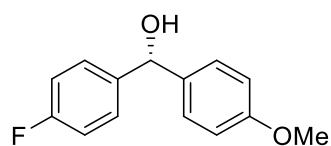

Yield: 45%.  $^1\text{H}$  NMR (400 MHz,  $\text{CDCl}_3$ )  $\delta$  7.40 – 7.29 (m, 2H), 7.25 (d,  $J$  = 7.5 Hz,

2H), 7.05 – 6.95 (m, 2H), 6.87 (d,  $J = 7.5$  Hz, 2H), 5.76 (s, 1H), 3.79 (s, 3H), 2.38 (s, 1H).  $^{13}\text{C}$  NMR (101 MHz,  $\text{CDCl}_3$ )  $\delta$  162.1 (d,  $J = 245.4$  Hz), 159.1, 139.8 (d,  $J = 2.9$  Hz), 136.0, 128.1 (d,  $J = 7.8$  Hz), 127.9, 115.2 (d,  $J = 21.7$  Hz), 114.0, 75.2, 55.3.  $^{19}\text{F}$  NMR (376 MHz,  $\text{CDCl}_3$ )  $\delta$  -115.4 (s, 1F).

HPLC condition: Chiralpak AS-3 column, n-hexane/2-propanol = 95:5, 1.0 mL/min, 230 nm UV detector,  $t_1 = 15.98$  min (major) and  $t_2 = 17.07$  min (minor), 77% ee.  $[\alpha]_{\text{D}}^{25} +10.4$  (c 0.5,  $\text{CHCl}_3$ ). (*lit.*  $[\alpha]_{\text{D}}^{20} +13.8$  (c 0.195, THF), 93% ee (*R*)).

**(-)-((4-methoxyphenyl)(*p*-tolyl)methyl)dimethyl(phenyl)silane (P30)**

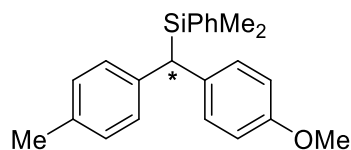

Yield: 40%. Colorless oil.  $[\alpha]_{\text{D}}^{30} -3.8$  (c 1.0,  $\text{CHCl}_3$ ), 56% ee.  $^1\text{H}$  NMR (400 MHz,  $\text{CDCl}_3$ )  $\delta$  7.37 – 7.21 (m, 5H), 7.05 – 6.96 (m, 6H), 6.76 – 6.71 (m, 2H), 3.74 (s, 3H), 3.64 (s, 1H), 2.27 (s, 3H), 0.28 (s, 3H), 0.27 (s, 3H).  $^{13}\text{C}$  NMR (101 MHz,  $\text{CDCl}_3$ )  $\delta$  157.2, 139.6, 137.9, 134.7, 134.4, 129.8 (2C signal), 129.0, 128.9, 128.7, 127.5, 113.6, 55.2, 43.9, 20.9, -3.1, -3.2.  $^{29}\text{Si}$  NMR (79 MHz,  $\text{CDCl}_3$ )  $\delta$  -3.4. **HRMS (ESI)** calcd for  $[\text{C}_{23}\text{H}_{26}\text{OSi} + \text{NH}_4]^+$ : 364.2097; Found 364.2100.

HPLC condition: Chiralpak AD-3 column, n-hexane/2-propanol = 99:1, 1.0 mL/min, 230 nm UV detector,  $t_1 = 4.11$  min (minor) and  $t_2 = 4.34$  min (major).

**(+)-dimethyl(naphthalen-2-yl(phenyl)methyl)(phenyl)silane (P31)**

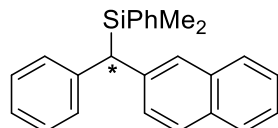

Yield: 85%. Colorless oil.  $[\alpha]_{\text{D}}^{30} +11.8$  (c 1.0,  $\text{CHCl}_3$ ), 53% ee.  $^1\text{H}$  NMR (400 MHz,  $\text{CDCl}_3$ )  $\delta$  7.79 – 7.71 (m, 1H), 7.66 (d,  $J = 8.2$  Hz, 2H), 7.56 (s, 1H), 7.42 – 7.16 (m, 12H), 7.12 (td,  $J = 6.8, 2.2$  Hz, 1H), 3.91 (s, 1H), 0.32 (s, 3H), 0.32 (s, 3H).  $^{13}\text{C}$  NMR (101 MHz,  $\text{CDCl}_3$ )  $\delta$  142.3, 140.0, 137.6, 134.5, 133.6, 131.6, 129.2, 129.1, 128.3, 127.7 (2C signal), 127.6 (2C signal), 127.5, 126.9, 125.8, 125.3, 125.0, 45.9, -3.0 (2C signal).  $^{29}\text{Si}$  NMR (79 MHz,  $\text{CDCl}_3$ )  $\delta$  -2.7. **HRMS (EI)** calcd for  $\text{C}_{25}\text{H}_{24}\text{Si}$   $[\text{M}]^+$ : 352.1647; Found 352.1647.

HPLC condition: phenomenex, Cellulose-3, methanol/2-propanol = 95:5, 1.0 mL/min, 230 nm UV detector,  $t_1 = 8.14$  min (major) and  $t_2 = 9.19$  min (minor).

**(-)-dimethyl(naphthalen-2-yl(4-nitrophenyl)methyl)(phenyl)silane (P32)**

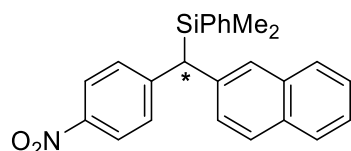

Yield: 89%. Colorless oil.  $[\alpha]_D^{30} -75.0$  (c 1.0,  $\text{CHCl}_3$ ), 96% ee.  $^1\text{H NMR}$  (400 MHz,  $\text{CDCl}_3$ )  $\delta$  8.03 (d,  $J = 8.8$  Hz, 2H), 7.80 – 7.70 (m, 3H), 7.60 (s, 1H), 7.47 – 7.34 (m, 3H), 7.34 – 7.18 (m, 7H), 4.03 (s, 1H), 0.35 (s, 3H), 0.33 (s, 3H).  $^{13}\text{C NMR}$  (101 MHz,  $\text{CDCl}_3$ )  $\delta$  150.6, 145.5, 138.0, 136.2, 134.3, 133.5, 131.7, 129.6, 128.9, 128.2, 128.0, 127.8, 127.5 (2C signal), 127.3, 126.1, 125.5, 123.4, 46.5, –3.0, –3.7.  $^{29}\text{Si NMR}$  (79 MHz,  $\text{CDCl}_3$ )  $\delta$  –1.7. HRMS (EI) calcd for  $\text{C}_{25}\text{H}_{23}\text{NO}_2\text{Si}$   $[\text{M}]^+$ : 397.1498; Found 397.1493.

HPLC condition: Chiralpak IC-3 column, n-hexane/2-propanol = 95:5, 1.0 mL/min, 230 nm UV detector,  $t_1 = 8.77$  min (minor) and  $t_2 = 9.85$  min (major).

**(–)-((2-methoxyphenyl)(phenyl)methyl)dimethyl(phenyl)silane (P33)**

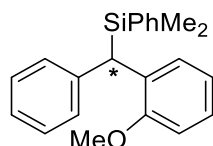

Yield: 60%. Colorless oil.  $[\alpha]_D^{27} -5.0$  (c 1.0,  $\text{CHCl}_3$ ), 32% ee.  $^1\text{H NMR}$  (400 MHz,  $\text{CDCl}_3$ )  $\delta$  7.40 – 7.27 (m, 5H), 7.26 – 7.08 (m, 7H), 6.92 – 6.79 (m, 2H), 4.34 (s, 1H), 3.70 (s, 3H), 0.33 (s, 3H), 0.30 (s, 3H).  $^{13}\text{C NMR}$  (101 MHz,  $\text{CDCl}_3$ )  $\delta$  156.8, 142.6, 138.6, 134.3, 131.1, 130.3, 129.0, 128.8, 128.0, 127.4, 126.4, 124.8, 120.2, 110.5, 55.1, 36.8, –2.8, –3.2.  $^{29}\text{Si NMR}$  (79 MHz,  $\text{CDCl}_3$ )  $\delta$  –1.8. HRMS (EI) calcd for  $\text{C}_{22}\text{H}_{24}\text{OSi}$   $[\text{M}]^+$ : 332.1596; Found 332.1587.

HPLC condition: Chiralcel OJ-3 column, n-hexane/2-propanol = 95:5, 1.0 mL/min, 230 nm UV detector,  $t_1 = 5.40$  min (major) and  $t_2 = 7.02$  min (minor).

**(–)-((2-methoxyphenyl)(4-nitrophenyl)methyl)dimethyl(phenyl)silane (P34)**

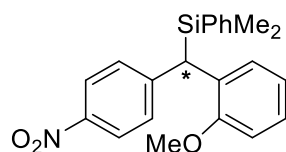

Yield: 45%. Colorless oil.  $[\alpha]_D^{30} -58.0$  (c 1.0,  $\text{CHCl}_3$ ), >99% ee.  $^1\text{H NMR}$  (400 MHz,  $\text{CDCl}_3$ )  $\delta$  7.99 (d,  $J = 8.8$  Hz, 2H), 7.40 – 7.33 (m, 1H), 7.34 – 7.30 (m, 4H), 7.25 – 7.16 (m, 2H), 7.16 – 7.09 (m, 2H), 6.89 (td,  $J = 7.5, 1.2$  Hz, 1H), 6.84 (dd,  $J = 8.2, 1.1$  Hz, 1H), 4.35 (s, 1H), 3.70 (s, 3H), 0.32 (s, 3H), 0.28 (s, 3H).  $^{13}\text{C NMR}$  (101 MHz,  $\text{CDCl}_3$ )  $\delta$  156.9, 151.4, 145.3, 137.4, 134.1, 130.5, 129.3, 129.2, 128.9, 127.7, 127.4, 123.2, 120.4, 110.8, 55.1, 38.5, –2.8, –3.6.  $^{29}\text{Si NMR}$  (79 MHz,  $\text{CDCl}_3$ )  $\delta$  –1.9. HRMS (EI) calcd for  $\text{C}_{22}\text{H}_{23}\text{NO}_3\text{Si}$   $[\text{M}]^+$ : 377.1447; Found 377.1440.

HPLC condition: Chiralpak AS-3 column, n-hexane/2-propanol = 95:5, 1.0 mL/min, 230 nm UV detector,  $t_1 = 5.58$  min (minor) and  $t_2 = 7.35$  min (major).

**(-)-((3-methoxyphenyl)(4-nitrophenyl)methyl)dimethyl(phenyl)silane (P35)**

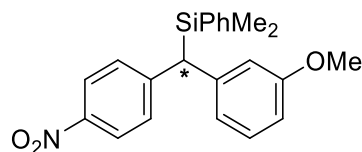

Yield: 73%. Colorless oil.  $[\alpha]_D^{30} -37.2$  (c 1.0,  $\text{CHCl}_3$ ), 99% ee.  $^1\text{H NMR}$  (400 MHz,  $\text{CDCl}_3$ )  $\delta$  8.03 (d,  $J = 8.8$  Hz, 2H), 7.38-7.36 (m, 1H), 7.35 – 7.25 (m, 4H), 7.18-7.16 (m, 3H), 6.79 – 6.71 (m, 2H), 6.68 (t,  $J = 2.1$  Hz, 1H), 3.84 (s, 1H), 3.71 (s, 3H), 0.33 (s, 3H), 0.32 (s, 3H).  $^{13}\text{C NMR}$  (101 MHz,  $\text{CDCl}_3$ )  $\delta$  159.6, 150.5, 145.5, 141.9, 136.2, 134.3, 129.6, 129.5, 128.9, 127.8, 123.4, 121.6, 115.1, 111.2, 55.0, 46.6, -3.1, -3.8.  $^{29}\text{Si NMR}$  (79 MHz,  $\text{CDCl}_3$ )  $\delta$  -1.8. HRMS (EI) calcd for  $\text{C}_{22}\text{H}_{23}\text{NO}_3\text{Si}$   $[\text{M}]^+$ : 377.1447; Found 377.1440.

HPLC condition: Chiralpak AS-3 column, n-hexane/2-propanol = 95:5, 1.0 mL/min, 230 nm UV detector,  $t_1 = 7.31$  min (major) and  $t_2 = 7.68$  min (minor).

**(-)-((benzo[d][1,3]dioxol-5-yl)(4-nitrophenyl)methyl)dimethyl(phenyl)silane (P36)**

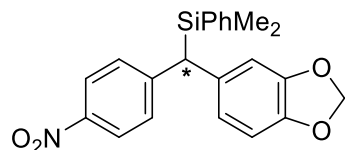

Yield: 49%. Colorless oil.  $[\alpha]_D^{30} -62.0$  (c 1.0,  $\text{CHCl}_3$ ), 97% ee.  $^1\text{H NMR}$  (400 MHz,  $\text{CDCl}_3$ )  $\delta$  8.03 (d,  $J = 8.8$  Hz, 2H), 7.43 – 7.35 (m, 1H), 7.34 – 7.22 (m, 4H), 7.18 – 7.08 (m, 2H), 6.72 (d,  $J = 7.8$  Hz, 1H), 6.68 – 6.58 (m, 2H), 5.92 (s, 2H), 3.79 (s, 1H), 0.33 (s, 3H), 0.32 (s, 3H).  $^{13}\text{C NMR}$  (101 MHz,  $\text{CDCl}_3$ )  $\delta$  150.9, 147.8, 145.8, 145.5, 136.2, 134.2, 134.2, 129.6, 128.7, 127.8, 123.4, 122.3, 109.8, 108.3, 101.0, 46.0, -3.0, -3.8.  $^{29}\text{Si NMR}$  (79 MHz,  $\text{CDCl}_3$ )  $\delta$  -2.1. HRMS (EI) calcd for  $\text{C}_{22}\text{H}_{21}\text{NO}_4\text{Si}$   $[\text{M}]^+$ : 391.1240; Found 391.1234.

HPLC condition: Chiralpak AD-3 column, n-hexane/2-propanol = 99:1, 1.0 mL/min, 230 nm UV detector,  $t_1 = 12.92$  min (minor) and  $t_2 = 15.61$  min (major).

**(-)-((benzofuran-5-yl)(4-(trifluoromethyl)phenyl)methyl)dimethyl(phenyl)silane (P37)**

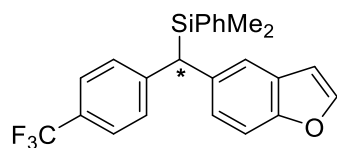

Yield: 82%. Colorless oil.  $[\alpha]_D^{30} -42.4$  (c 1.0,  $\text{CHCl}_3$ ), 98% ee.  $^1\text{H NMR}$  (400 MHz,  $\text{CDCl}_3$ )  $\delta$  7.56 (d,  $J = 2.2$  Hz, 1H), 7.43 (d,  $J = 8.3$  Hz, 2H), 7.38 – 7.34 (m, 3H), 7.30 – 7.28 (m, 4H), 7.20 (d,  $J = 8.2$  Hz, 2H), 7.07 (dd,  $J = 8.6, 1.9$  Hz, 1H), 6.66 (d,  $J = 1.3$

Hz, 1H), 3.90 (s, 1H), 0.32 (s, 3H), 0.31 (s, 3H).  $^{13}\text{C}$  NMR (101 MHz,  $\text{CDCl}_3$ )  $\delta$  153.4, 147.2, 145.2, 136.9, 135.8, 134.4, 129.4, 128.7, 127.7, 127.6, 127.3 (q,  $J = 32.0$  Hz), 125.8, 125.0 (q,  $J = 4.2$  Hz), 124.4 (q,  $J = 270.0$  Hz), 121.2, 111.1, 106.5, 45.6,  $-3.0$ ,  $-3.5$ .  $^{19}\text{F}$  NMR (376 MHz,  $\text{CDCl}_3$ )  $\delta$   $-62.8$  (s, 3F).  $^{29}\text{Si}$  NMR (79 MHz,  $\text{CDCl}_3$ )  $\delta$   $-2.5$ . HRMS (EI) calcd for  $\text{C}_{23}\text{H}_{18}\text{F}_3\text{OSi}$   $[\text{M}-\text{CH}_3]^+$ : 395.1079; Found 395.1067.

HPLC condition: Chiralpak AD-3 column, n-hexane/2-propanol = 99:1, 1.0 mL/min, 230 nm UV detector,  $t_1 = 3.91$  min (minor) and  $t_2 = 4.31$  min (major).

**(-)-5-((dimethyl(phenyl)silyl)(4-(trifluoromethyl)phenyl)methyl)-1H-indole (P38)**

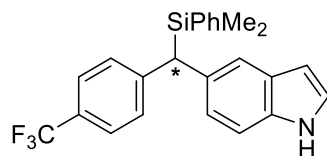

Yield: 44%. Colorless oil.  $[\alpha]_{\text{D}}^{30} -59.0$  (c 1.0,  $\text{CHCl}_3$ ), 99% ee.  $^1\text{H}$  NMR (400 MHz,  $\text{CDCl}_3$ )  $\delta$  8.02 (s, 1H), 7.43 (s, 1H), 7.39 (d,  $J = 8.2$  Hz, 2H), 7.37 – 7.25 (m, 5H), 7.25 – 7.15 (m, 3H), 7.15 – 7.11 (m, 1H), 6.97 (dd,  $J = 8.2, 1.6$  Hz, 1H), 6.45 (s, 1H), 3.90 (s, 1H), 0.32 (s, 3H), 0.30 (s, 3H).  $^{13}\text{C}$  NMR (101 MHz,  $\text{CDCl}_3$ )  $\delta$  147.8, 137.4, 134.4, 134.2, 132.6, 129.2, 128.7, 128.1, 127.6, 126.9 (q,  $J = 32.0$  Hz), 124.9 (q,  $J = 4.3$  Hz), 124.5 (q,  $J = 270.0$  Hz), 124.4, 124.2, 120.9, 110.9, 102.4, 45.6,  $-2.8$ ,  $-3.4$ .  $^{19}\text{F}$  NMR (376 MHz,  $\text{CDCl}_3$ )  $\delta$   $-62.8$  (s, 3F).  $^{29}\text{Si}$  NMR (79 MHz,  $\text{CDCl}_3$ )  $\delta$   $-2.7$ . HRMS (EI) calcd for  $\text{C}_{24}\text{H}_{22}\text{F}_3\text{NSi}$   $[\text{M}]^+$ : 409.1474; Found 409.1467.

HPLC condition: Chiralpak AD-3 column, n-hexane/2-propanol = 95:5, 1.0 mL/min, 230 nm UV detector,  $t_1 = 7.63$  min (minor) and  $t_2 = 8.63$  min (major).

**(+)-((2-chlorophenyl)(phenyl)methyl)dimethyl(phenyl)silane (P39)**

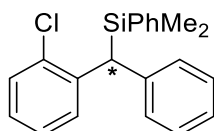

The diazo compound disappeared completely for 15 min. Yield: 92%. Colorless oil.  $[\alpha]_{\text{D}}^{25} +7.0$  (c 1.0,  $\text{CHCl}_3$ ), 99% ee.  $^1\text{H}$  NMR (400 MHz,  $\text{CDCl}_3$ )  $\delta$  7.38 – 7.23 (m, 7H), 7.21 – 7.14 (m, 2H), 7.14 – 7.08 (m, 4H), 7.04 (td,  $J = 7.7, 1.8$  Hz, 1H), 4.44 (s, 1H), 0.34 (s, 3H), 0.31 (s, 3H).  $^{13}\text{C}$  NMR (101 MHz,  $\text{CDCl}_3$ )  $\delta$  141.3, 140.1, 137.3, 134.6, 134.5, 130.9, 129.8, 129.3, 129.1, 128.2, 127.7, 126.7, 126.4, 125.3, 40.6,  $-2.7$ ,  $-3.3$ .  $^{29}\text{Si}$  NMR (79 MHz,  $\text{CDCl}_3$ )  $\delta$   $-2.3$ . HRMS (EI) calcd for  $\text{C}_{21}\text{H}_{21}\text{ClSi}$   $[\text{M}-\text{CH}_3]^+$ : 321.0866; Found 321.0854.

HPLC condition: Chiralcel OJ-3 column, n-hexane/2-propanol = 95:5, 1.0 mL/min, 230 nm UV detector,  $t_1 = 4.91$  min (minor) and  $t_2 = 7.32$  min (major).

**(+)-((2-bromophenyl)(phenyl)methyl)dimethyl(phenyl)silane (P40)**

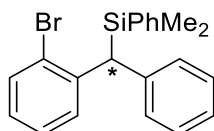

The diazo compound disappeared completely for 10 min. Yield: 82%. Colorless oil.  $[\alpha]_D^{25} +4.0$  (c 1.0,  $\text{CHCl}_3$ ), 98% ee.  $^1\text{H NMR}$  (400 MHz,  $\text{CDCl}_3$ )  $\delta$  7.52 (dd,  $J = 8.0$ , 1.4 Hz, 1H), 7.38 – 7.25 (m, 6H), 7.21 – 7.14 (m, 3H), 7.13 – 7.05 (m, 3H), 6.97 (ddd,  $J = 7.9$ , 7.3, 1.7 Hz, 1H), 4.44 (s, 1H), 0.34 (s, 3H), 0.31 (s, 3H).  $^{13}\text{C NMR}$  (101 MHz,  $\text{CDCl}_3$ )  $\delta$  141.8, 141.2, 137.2, 134.5, 133.2, 130.9, 129.3, 129.0, 128.2, 127.7, 127.1, 127.0, 126.3, 125.3, 43.6, –2.6, –3.4.  $^{29}\text{Si NMR}$  (79 MHz,  $\text{CDCl}_3$ )  $\delta$  –2.2. HRMS (EI) calcd for  $\text{C}_{20}\text{H}_{18}\text{BrSi}$   $[\text{M}-\text{CH}_3]^+$ : 365.0361; Found 365.0353.

HPLC condition: Chiralcel OJ-3 column, n-hexane/2-propanol = 95:5, 1.0 mL/min, 230 nm UV detector,  $t_1 = 5.04$  min (minor) and  $t_2 = 7.79$  min (major).

**(+)-((2-fluorophenyl)(phenyl)methyl)dimethyl(phenyl)silane (P41)**

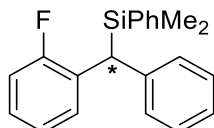

The diazo compound disappeared completely for 5.0 h. Yield: 69%. Colorless oil.  $[\alpha]_D^{25} +1.8$  (c 0.5,  $\text{CHCl}_3$ ), 83% ee.  $^1\text{H NMR}$  (400 MHz,  $\text{CDCl}_3$ )  $\delta$  7.37 – 7.16 (m, 8H), 7.14 – 7.06 (m, 4H), 7.03 – 6.94 (m, 2H), 4.13 (s, 1H), 0.33 (s, 3H), 0.30 (s, 3H).  $^{13}\text{C NMR}$  (101 MHz,  $\text{CDCl}_3$ )  $\delta$  160.4 (d,  $J = 242.0$  Hz), 141.6, 137.4, 134.4, 130.8 (d,  $J = 3.7$  Hz), 129.6 (d,  $J = 15.5$  Hz), 129.2, 129.0, 128.2, 127.6, 126.9 (d,  $J = 8.0$  Hz), 125.3, 123.8 (d,  $J = 3.7$  Hz), 115.4 (d,  $J = 23.5$  Hz), 36.5, –3.0, –3.4.  $^{19}\text{F NMR}$  (376 MHz,  $\text{CDCl}_3$ )  $\delta$  –115.9 (s, 1F).  $^{29}\text{Si NMR}$  (79 MHz,  $\text{CDCl}_3$ )  $\delta$  –2.2. HRMS (EI) calcd for  $\text{C}_{21}\text{H}_{21}\text{FSi}$   $[\text{M}]^+$ : 320.1397; Found 320.1387.

HPLC condition: Chiralcel OJ-3 column, n-hexane/2-propanol = 95:5, 1.0 mL/min, 230 nm UV detector,  $t_1 = 4.94$  min (minor) and  $t_2 = 5.82$  min (major).

**(–)-((2-fluorophenyl)(4-methoxyphenyl)methyl)dimethyl(phenyl)silane (P42)**

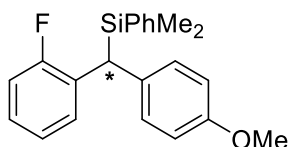

Yield: 36%. Colorless oil.  $[\alpha]_D^{25} -12.0$  (c 1.0,  $\text{CHCl}_3$ ), 91% ee.  $^1\text{H NMR}$  (400 MHz,  $\text{CDCl}_3$ )  $\delta$  7.37 – 7.25 (m, 5H), 7.18 (td,  $J = 8.0$ , 2.0 Hz, 1H), 7.11 – 7.01 (m, 3H), 7.00 – 6.93 (m, 2H), 6.77 – 6.70 (m, 2H), 4.07 (s, 1H), 3.74 (s, 3H), 0.32 (s, 3H), 0.29 (s, 3H).  $^{13}\text{C NMR}$  (101 MHz,  $\text{CDCl}_3$ )  $\delta$  160.2 (d,  $J = 242.0$  Hz), 157.3, 137.4, 134.3, 133.5, 130.6 (d,  $J = 3.8$  Hz), 130.0, 129.9 (d,  $J = 15.7$  Hz), 129.1, 127.5, 126.6 (q,  $J = 8.0$  Hz), 123.7 (d,  $J = 3.6$  Hz), 115.3 (d,  $J = 23.5$  Hz), 113.6, 55.1, 35.2, –3.1, –3.5.  $^{19}\text{F NMR}$



(376 MHz, CDCl<sub>3</sub>)  $\delta$  -116.9 (s, 1F). <sup>29</sup>Si NMR (79 MHz, CDCl<sub>3</sub>)  $\delta$  -2.5. HRMS (EI) calcd for C<sub>22</sub>H<sub>23</sub>FOSi [M]<sup>+</sup>: 350.1502; Found 350.1498.

HPLC condition: Chiralcel OJ-3 column, n-hexane/2-propanol = 95:5, 1.0 mL/min, 230 nm UV detector,  $t_1$  = 6.01 min (minor) and  $t_2$  = 7.40 min (major).

**(-)-ethoxydimethyl((4-nitrophenyl)(phenyl)methyl)silane (P43)**

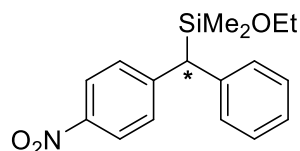

Yield: 76%. Colorless oil.  $[\alpha]_D^{25}$  -0.2 (c 1.0, CHCl<sub>3</sub>), >99% ee. <sup>1</sup>H NMR (400 MHz, CDCl<sub>3</sub>)  $\delta$  8.14 (d,  $J$  = 8.8 Hz, 2H), 7.47 (d,  $J$  = 8.8 Hz, 2H), 7.36 – 7.32 (m, 4H), 7.25 – 7.23 (m, 1H), 3.73 (s, 1H), 3.62 (q,  $J$  = 7.0 Hz, 2H), 1.17 (t,  $J$  = 6.9 Hz, 3H), 0.15 (s, 3H), 0.14 (s, 3H). <sup>13</sup>C NMR (101 MHz, CDCl<sub>3</sub>)  $\delta$  150.7, 145.6, 140.2, 129.3, 129.1, 128.7, 126.0, 123.5, 59.0, 46.8, 18.4, -2.4, -2.5. <sup>29</sup>Si NMR (79 MHz, CDCl<sub>3</sub>)  $\delta$  +12.1. HRMS (EI) calcd for C<sub>17</sub>H<sub>21</sub>NO<sub>3</sub>Si [M]<sup>+</sup>: 315.1291; Found 315.1283.

HPLC condition: Chiralpak IC-3 column, n-hexane/2-propanol = 95:5, 1.0 mL/min, 230 nm UV detector,  $t_1$  = 7.16 min (minor) and  $t_2$  = 7.93 min (major).

**(-)-dimethyl((4-nitrophenyl)(phenyl)methyl)silanol (P44)**

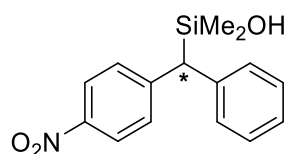

Yield: 56%. Colorless oil.  $[\alpha]_D^{25}$  -0.1 (c 0.5, CHCl<sub>3</sub>), 98% ee. <sup>1</sup>H NMR (400 MHz, CDCl<sub>3</sub>)  $\delta$  7.96 (d,  $J$  = 8.8 Hz, 2H), 7.30 (d,  $J$  = 8.8 Hz, 2H), 7.18 – 7.15 (m, 4H), 7.14 – 7.02 (m, 1H), 3.55 (s, 1H), 1.97 (s, 1H), 0.01 (s, 3H), 0.00 (s, 3H). <sup>13</sup>C NMR (101 MHz, CDCl<sub>3</sub>)  $\delta$  150.4, 145.6, 140.0, 129.1, 129.0, 128.8, 126.1, 123.6, 47.6, -0.8, -0.9. <sup>29</sup>Si NMR (79 MHz, CDCl<sub>3</sub>)  $\delta$  +13.0. HRMS (ESI) calcd for C<sub>15</sub>H<sub>17</sub>NO<sub>3</sub>Si [M+Na]<sup>+</sup>: 310.0875; Found 310.0873.

HPLC condition: Chiralcel OD-3 column, n-hexane/2-propanol = 95:5, 1.0 mL/min, 230 nm UV detector,  $t_1$  = 8.37 min (minor) and  $t_2$  = 9.75 min (major).

**(-)-triethyl((4-nitrophenyl)(phenyl)methyl)silane (P45)**

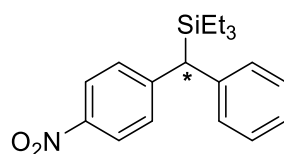

Yield: 64%. Colorless oil.  $[\alpha]_D^{25}$  -74.0 (c 0.3, CHCl<sub>3</sub>), 96% ee. <sup>1</sup>H NMR (400 MHz, CDCl<sub>3</sub>)  $\delta$  8.14 (d,  $J$  = 8.8 Hz, 2H), 7.42 (d,  $J$  = 8.8 Hz, 2H), 7.38 – 7.27 (m, 4H), 7.26 – 7.19 (m, 1H), 3.84 (s, 1H), 0.89 (t,  $J$  = 7.9 Hz, 9H), 0.69 – 0.61 (m, 6H). <sup>13</sup>C NMR

(101 MHz, CDCl<sub>3</sub>)  $\delta$  151.6, 145.5, 141.0, 129.1, 128.7, 128.7, 125.9, 123.6, 43.8, 7.4, 3.4. <sup>29</sup>Si NMR (79 MHz, CDCl<sub>3</sub>)  $\delta$  +8.4. HRMS (EI) calcd for C<sub>19</sub>H<sub>25</sub>NO<sub>2</sub>Si [M]<sup>+</sup>: 327.1655; Found 327.1647.

HPLC condition: Chiralpak IC-3 column, n-hexane/2-propanol = 95:5, 1.0 mL/min, 230 nm UV detector,  $t_1$  = 7.26 min (minor) and  $t_2$  = 8.15 min (major).

**(-)-methyl((4-nitrophenyl)(phenyl)methyl)diphenylsilane (P46)**

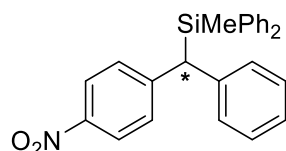

Yield: 62%. Colorless oil.  $[\alpha]_D^{25}$  -41.4 (c 1.0, CHCl<sub>3</sub>), 94% ee. <sup>1</sup>H NMR (400 MHz, CDCl<sub>3</sub>)  $\delta$  8.04 – 7.92 (m, 2H), 7.43 – 7.34 (m, 4H), 7.33 – 7.26 (m, 6H), 7.24 – 7.15 (m, 3H), 7.14 – 7.08 (m, 4H), 4.27 (s, 1H), 0.55 (s, 3H). <sup>13</sup>C NMR (101 MHz, CDCl<sub>3</sub>)  $\delta$  150.5, 145.7, 140.2, 135.3, 135.2, 134.8, 134.4, 129.9, 129.8, 129.7, 129.4, 128.7, 128.0 (2C signal), 126.2, 123.4, 45.2, -3.9. <sup>29</sup>Si NMR (79 MHz, CDCl<sub>3</sub>)  $\delta$  -8.2. HRMS (EI) calcd for C<sub>26</sub>H<sub>23</sub>NO<sub>2</sub>Si [M]<sup>+</sup>: 409.1498; Found 409.1491.

HPLC condition: Chiralpak IC-3 column, n-hexane/2-propanol = 99:1, 1.0 mL/min, 230 nm UV detector,  $t_1$  = 9.32 min (minor) and  $t_2$  = 9.69 min (major).

**(S)-dimethyl((4-nitrophenyl)(phenyl)methyl)(phenylethynyl)silane (P47)**

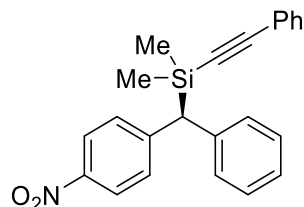

Yield: 93%. white solid. m.p.: 50–52 °C.  $[\alpha]_D^{28}$  -20.4 (c 1.0, CHCl<sub>3</sub>), >99% ee. <sup>1</sup>H NMR (400 MHz, CDCl<sub>3</sub>)  $\delta$  8.13 (d,  $J$  = 8.8 Hz, 2H), 7.55 (d,  $J$  = 8.8 Hz, 2H), 7.48 – 7.38 (m, 4H), 7.38 – 7.27 (m, 5H), 7.27 – 7.17 (m, 1H), 3.79 (s, 1H), 0.25 (s, 3H), 0.23 (s, 3H). <sup>13</sup>C NMR (101 MHz, CDCl<sub>3</sub>)  $\delta$  150.4, 145.7, 140.1, 131.8, 129.3, 129.0, 129.0, 128.7, 128.3, 126.2, 123.5, 122.4, 108.2, 91.1, 45.5, -1.9, -2.2. <sup>29</sup>Si NMR (79 MHz, CDCl<sub>3</sub>)  $\delta$  -14.9. HRMS (EI) calcd for C<sub>23</sub>H<sub>21</sub>NO<sub>2</sub>Si [M]<sup>+</sup>: 371.1342; Found 371.1336. The absolute configuration of **P47** is *S* determined by X-ray single crystal analysis, see below.

HPLC condition: Chiralpak IC-3 column, n-hexane/2-propanol = 95:5, 1.0 mL/min, 230 nm UV detector,  $t_1$  = 7.75 min (minor) and  $t_2$  = 8.20 min (major).

**(-)-(3-chloropropyl)dimethyl((4-nitrophenyl)(phenyl)methyl)silane (P48)**

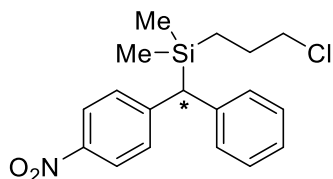

Yield: 89%. Colorless oil.  $[\alpha]_{\text{D}}^{28}$   $-47.6$  (c 1.0,  $\text{CHCl}_3$ ), 99% ee.  $^1\text{H}$  NMR (400 MHz,  $\text{CDCl}_3$ )  $\delta$  8.20 (d,  $J = 8.8$  Hz, 2H), 7.50 – 7.36 (m, 4H), 7.36 – 7.26 (m, 3H), 3.80 (s, 1H), 3.48 (t,  $J = 6.8$  Hz, 2H), 1.81 – 1.66 (m, 2H), 0.78 – 0.65 (m, 2H), 0.16 (s, 3H), 0.15 (s, 3H).  $^{13}\text{C}$  NMR (101 MHz,  $\text{CDCl}_3$ )  $\delta$  151.0, 145.6, 140.6, 129.0, 128.9, 128.7, 126.1, 123.7, 47.7, 45.7, 27.3, 12.2,  $-3.5$ ,  $-3.7$ .  $^{29}\text{Si}$  NMR (79 MHz,  $\text{CDCl}_3$ )  $\delta$   $-10.0$ . HRMS (EI) calcd for  $\text{C}_{18}\text{H}_{22}\text{ClNO}_2\text{Si}$   $[\text{M}]^+$ : 347.1108; Found 347.1100.

HPLC condition: Chiralpak IC-3 column, n-hexane/2-propanol = 95:5, 1.0 mL/min, 230 nm UV detector,  $t_1 = 10.37$  min (minor) and  $t_2 = 12.38$  min (major).

**(-)-5-(dimethyl((4-nitrophenyl)(phenyl)methyl)silyl)-1-methyl-1H-indole (P49)**

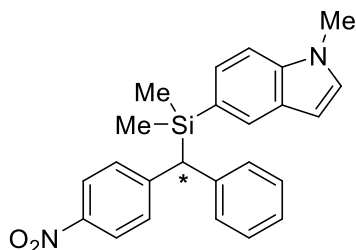

Yield: 53%. Colorless oil.  $[\alpha]_{\text{D}}^{28}$   $-83.2$  (c 1.0,  $\text{CHCl}_3$ ), >99% ee.  $^1\text{H}$  NMR (400 MHz,  $\text{CDCl}_3$ )  $\delta$  8.05 (d,  $J = 8.8$  Hz, 2H), 7.63 (s, 1H), 7.35 – 7.26 (m, 3H), 7.25 – 7.21 (m, 5H), 7.12 – 7.05 (m, 2H), 6.51 (dd,  $J = 3.1, 0.9$  Hz, 1H), 3.96 (s, 1H), 3.84 (s, 3H), 0.40 (s, 3H), 0.38 (s, 3H).  $^{13}\text{C}$  NMR (101 MHz,  $\text{CDCl}_3$ )  $\delta$  151.3, 145.4, 141.0, 137.5, 129.3, 129.1, 128.9, 128.6, 128.4, 127.9, 127.1, 125.9, 124.8, 123.3, 108.9, 101.2, 47.3, 32.8,  $-2.5$ ,  $-3.3$ .  $^{29}\text{Si}$  NMR (79 MHz,  $\text{CDCl}_3$ )  $\delta$   $-1.5$ . HRMS (EI) calcd for  $\text{C}_{24}\text{H}_{24}\text{N}_2\text{O}_2\text{Si}$   $[\text{M}]^+$ : 400.1607; Found 400.1601.

HPLC condition: Chiralpak IC-3 column, n-hexane/2-propanol = 98:2, 1.0 mL/min, 230 nm UV detector,  $t_1 = 17.28$  min (minor) and  $t_2 = 18.11$  min (major).

## 8. Competition experiments for kinetic isotope effect

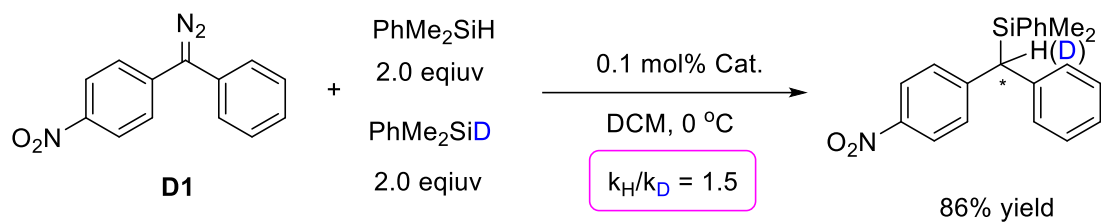

$^1\text{H NMR}$

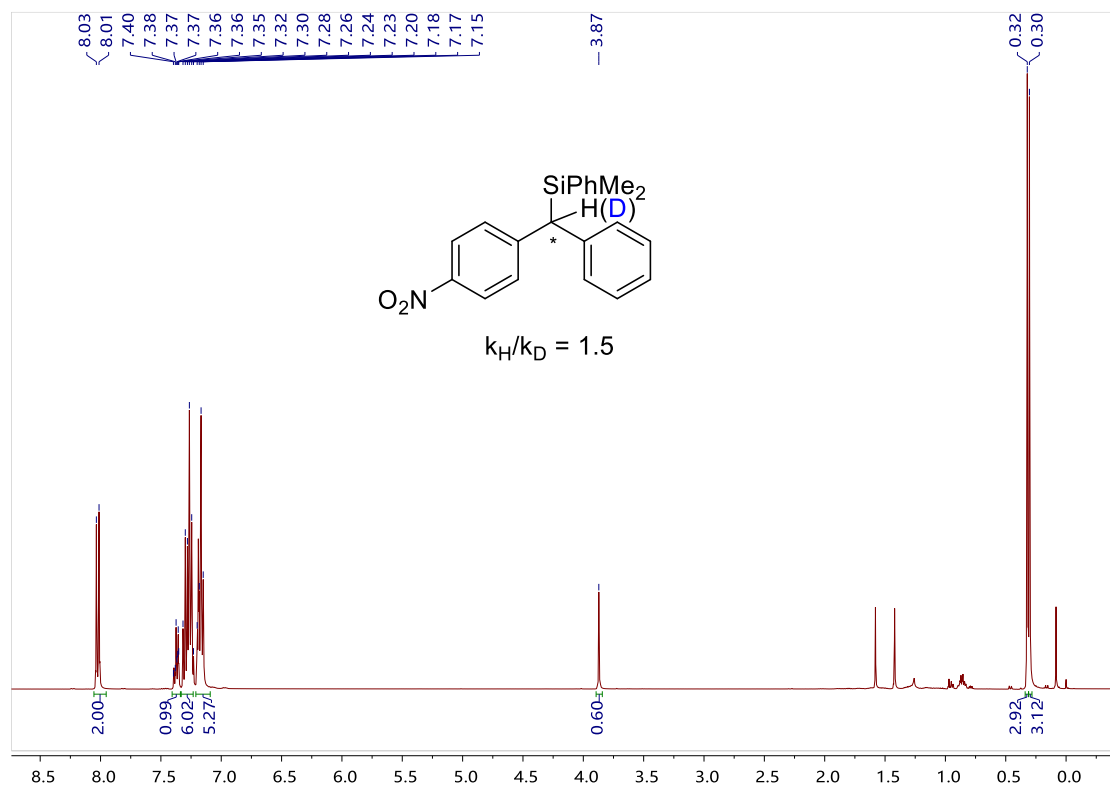

## 9. Crystal data and structures refinement

### Crystal data and structures refinement of $C_3(MeOH)_2$

**$C_3(MeOH)_2$** : (The crystal structure of compound  $C_3(MeOH)_2$  has been deposited at the Cambridge Crystallographic Data Centre (CCDC 1888695). The data is available free of charge at [www.ccdc.cam.ac.uk/conts/retrieving.html](http://www.ccdc.cam.ac.uk/conts/retrieving.html).)

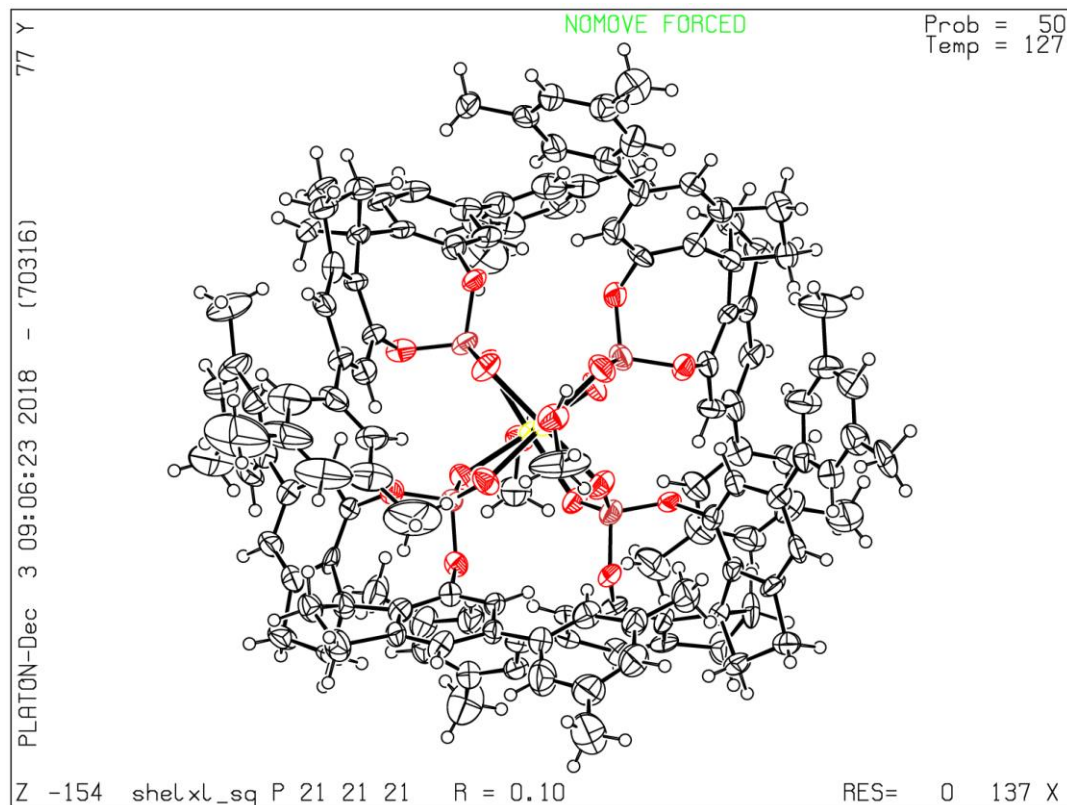

**Table S3. Crystal data and structure refinement for C<sub>3</sub>(MeOH)<sub>2</sub>**

|                                             |                                                                                  |
|---------------------------------------------|----------------------------------------------------------------------------------|
| Identification code                         | shelxl_sq                                                                        |
| Empirical formula                           | C <sub>134</sub> H <sub>128</sub> O <sub>18</sub> P <sub>4</sub> Rh <sub>2</sub> |
| Formula weight                              | 2356.06                                                                          |
| Temperature/K                               | 127.15                                                                           |
| Crystal system                              | orthorhombic                                                                     |
| Space group                                 | P2 <sub>1</sub> 2 <sub>1</sub> 2 <sub>1</sub>                                    |
| a/Å                                         | 14.423(3)                                                                        |
| b/Å                                         | 28.903(6)                                                                        |
| c/Å                                         | 31.726(6)                                                                        |
| α/°                                         | 90                                                                               |
| β/°                                         | 90                                                                               |
| γ/°                                         | 90                                                                               |
| Volume/Å <sup>3</sup>                       | 13226(5)                                                                         |
| Z                                           | 4                                                                                |
| ρ <sub>calc</sub> /cm <sup>3</sup>          | 1.183                                                                            |
| μ/mm <sup>-1</sup>                          | 0.358                                                                            |
| F(000)                                      | 4904.0                                                                           |
| Crystal size/mm <sup>3</sup>                | 0.32 × 0.18 × 0.16                                                               |
| Radiation                                   | MoKα (λ = 0.71073)                                                               |
| 2θ range for data collection/°              | 3.096 to 50.698                                                                  |
| Index ranges                                | -14 ≤ h ≤ 17, -34 ≤ k ≤ 34, -38 ≤ l ≤ 38                                         |
| Reflections collected                       | 74686                                                                            |
| Independent reflections                     | 23598 [R <sub>int</sub> = 0.1188, R <sub>sigma</sub> = 0.1387]                   |
| Data/restraints/parameters                  | 23598/12/1447                                                                    |
| Goodness-of-fit on F <sup>2</sup>           | 1.125                                                                            |
| Final R indexes [I ≥ 2σ (I)]                | R <sub>1</sub> = 0.1017, wR <sub>2</sub> = 0.2024                                |
| Final R indexes [all data]                  | R <sub>1</sub> = 0.1192, wR <sub>2</sub> = 0.2163                                |
| Largest diff. peak/hole / e Å <sup>-3</sup> | 0.95/-0.69                                                                       |
| Flack parameter                             | 0.00(3)                                                                          |

### Crystal data and structures refinement of P47

**Compound P47:** (The crystal structure of compound **P47** has been deposited at the Cambridge Crystallographic Data Centre (CCDC 1888689). The data is available free of charge at [www.ccdc.cam.ac.uk/conts/retrieving.html](http://www.ccdc.cam.ac.uk/conts/retrieving.html).)

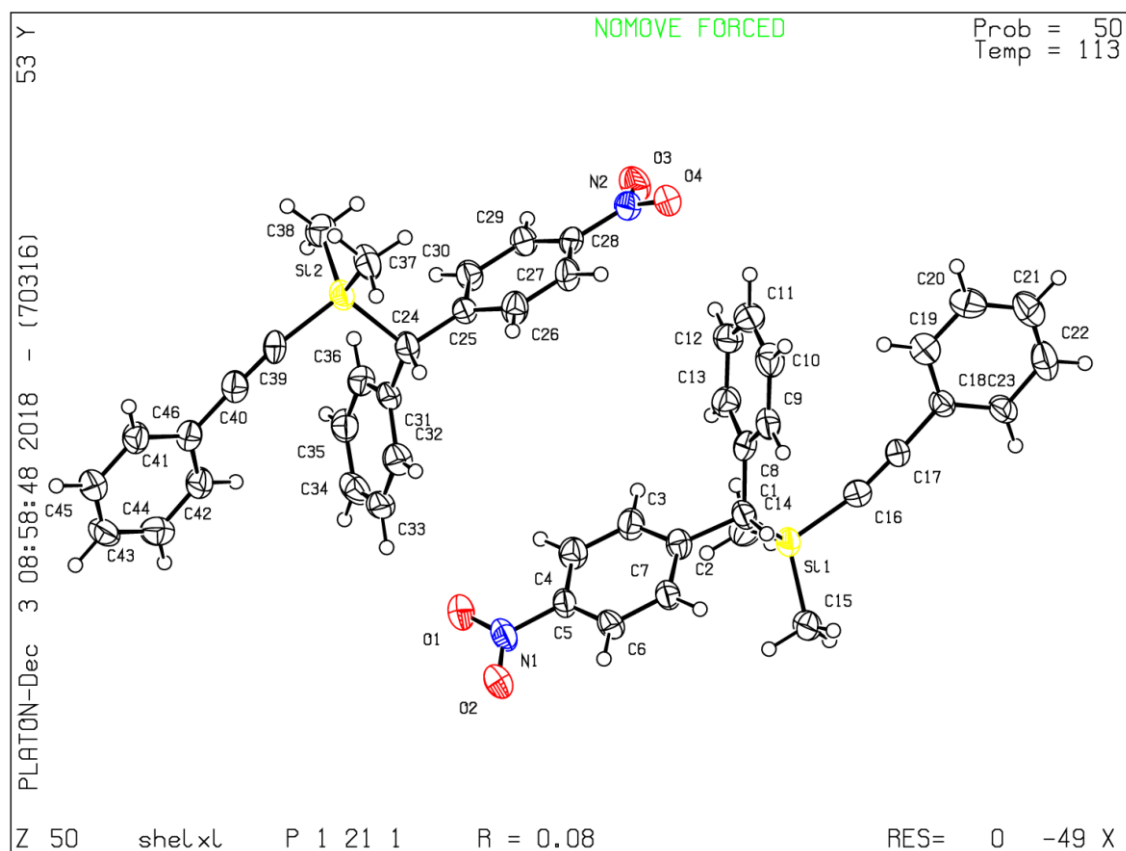

**Table S4. Crystal data and structure refinement for P47**

|                                             |                                                               |
|---------------------------------------------|---------------------------------------------------------------|
| Identification code                         | shelxl                                                        |
| Empirical formula                           | C <sub>23</sub> H <sub>21</sub> NO <sub>2</sub> Si            |
| Formula weight                              | 371.50                                                        |
| Temperature/K                               | 113.15                                                        |
| Crystal system                              | monoclinic                                                    |
| Space group                                 | P2 <sub>1</sub>                                               |
| a/Å                                         | 9.952(2)                                                      |
| b/Å                                         | 19.926(4)                                                     |
| c/Å                                         | 10.453(2)                                                     |
| α/°                                         | 90                                                            |
| β/°                                         | 90.60(3)                                                      |
| γ/°                                         | 90                                                            |
| Volume/Å <sup>3</sup>                       | 2072.7(7)                                                     |
| Z                                           | 4                                                             |
| ρ <sub>calc</sub> /cm <sup>3</sup>          | 1.190                                                         |
| μ/mm <sup>-1</sup>                          | 0.130                                                         |
| F(000)                                      | 784.0                                                         |
| Crystal size/mm <sup>3</sup>                | 0.2 × 0.18 × 0.12                                             |
| Radiation                                   | MoKα (λ = 0.71073)                                            |
| 2θ range for data collection/°              | 4.092 to 50.038                                               |
| Index ranges                                | -11 ≤ h ≤ 11, -23 ≤ k ≤ 23, -12 ≤ l ≤ 12                      |
| Reflections collected                       | 16192                                                         |
| Independent reflections                     | 7292 [R <sub>int</sub> = 0.0564, R <sub>sigma</sub> = 0.0802] |
| Data/restraints/parameters                  | 7292/1/492                                                    |
| Goodness-of-fit on F <sup>2</sup>           | 1.078                                                         |
| Final R indexes [I ≥ 2σ (I)]                | R <sub>1</sub> = 0.0763, wR <sub>2</sub> = 0.1955             |
| Final R indexes [all data]                  | R <sub>1</sub> = 0.0912, wR <sub>2</sub> = 0.2095             |
| Largest diff. peak/hole / e Å <sup>-3</sup> | 0.70/-0.33                                                    |
| Flack parameter                             | 0.01(11)                                                      |



## 10. NMR spectra for new compounds

### benzofuran-5-yl(4-(trifluoromethyl)phenyl)methanone (K37)

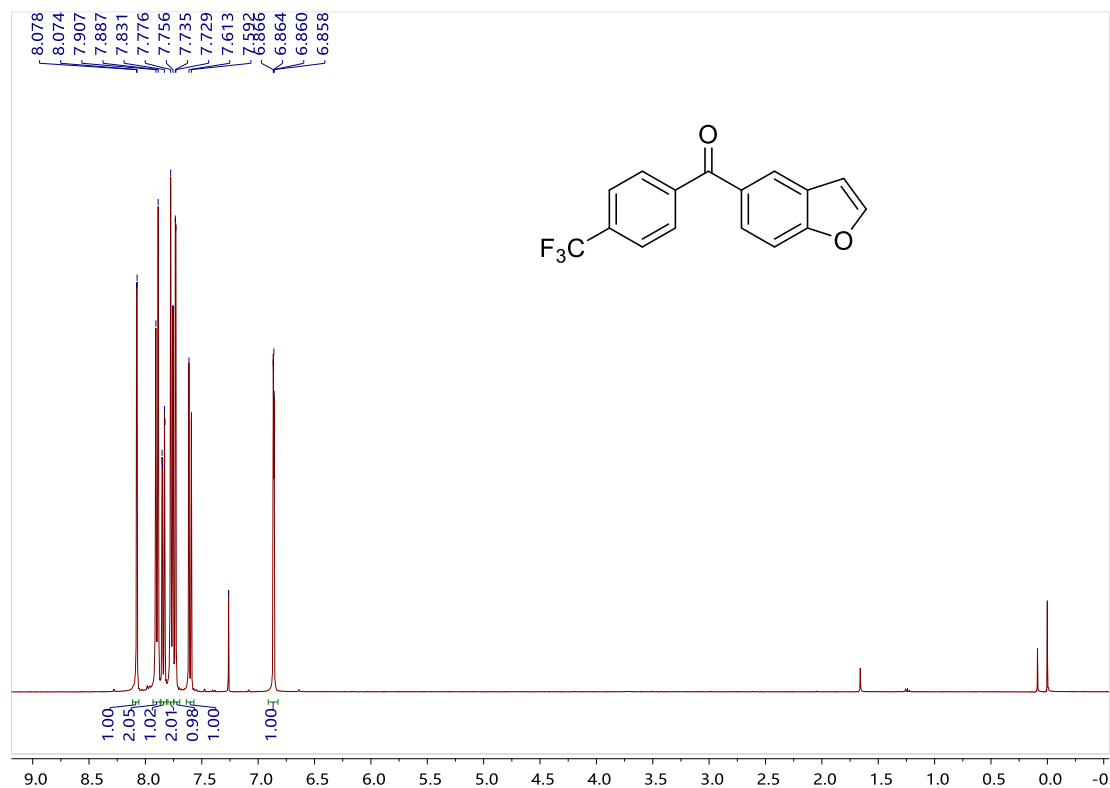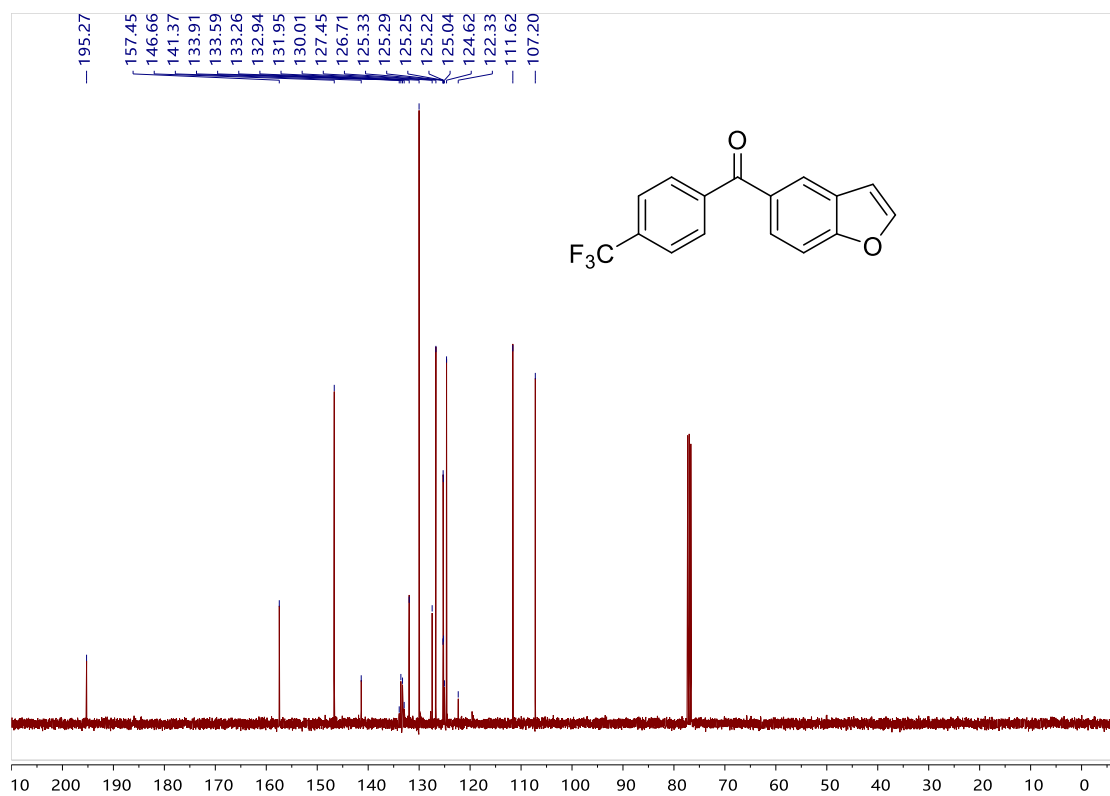

**(1H-indol-5-yl)(4-(trifluoromethyl)phenyl)methanone (K38)**

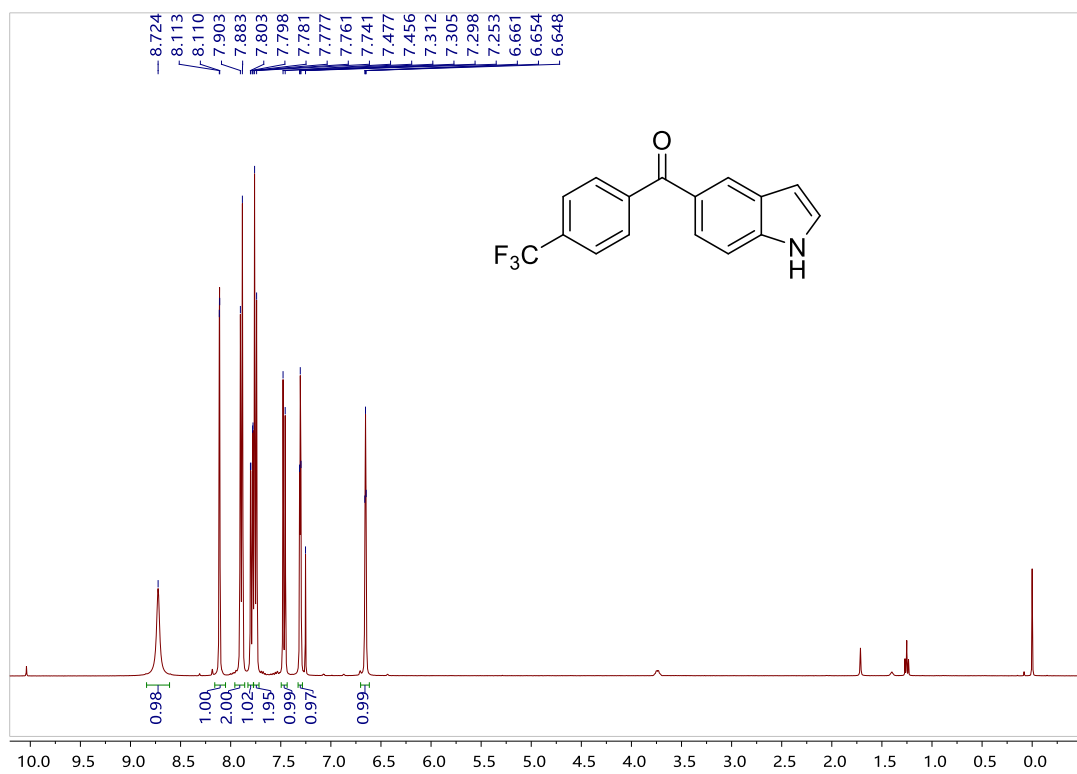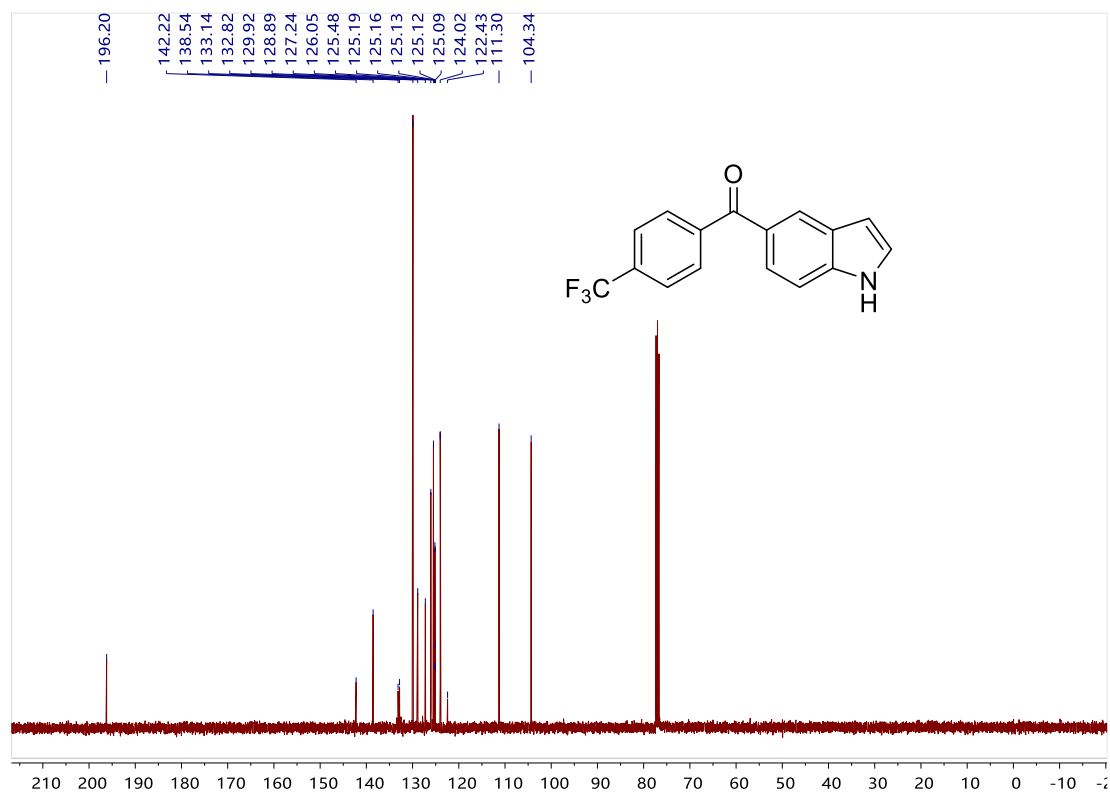

### 5-(dimethylsilyl)-1-methyl-1H-indole (S9)

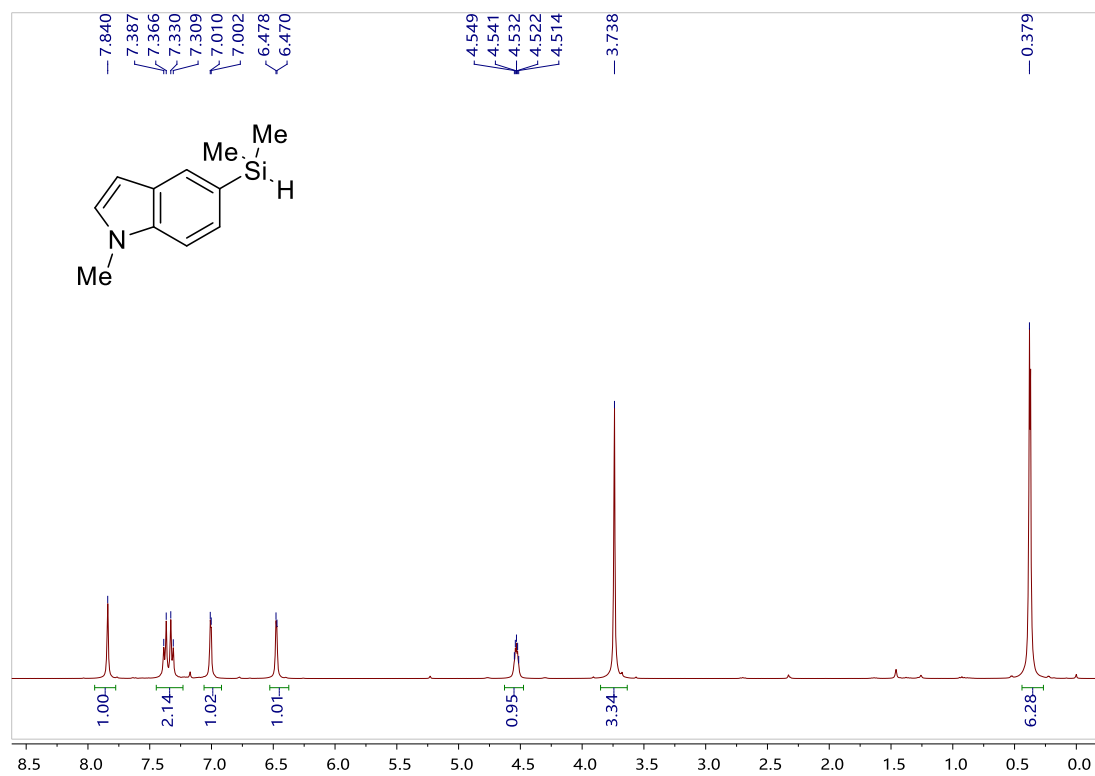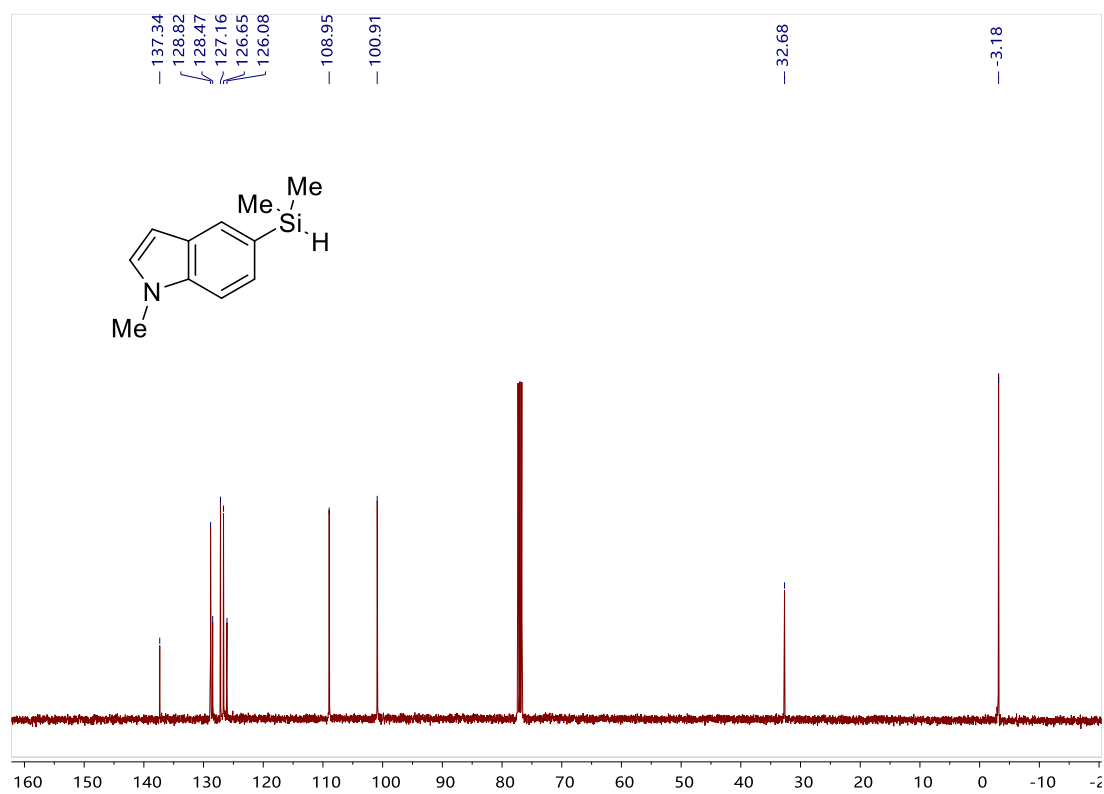

**(S)-2,2'-(7,7'-dimethoxy-2,2',3,3'-tetrahydro-1,1'-spirobi[indene]-5,5'-diyl)bis(4,4,5,5-tetramethyl-1,3,2-dioxaborolane) (SI-3)**

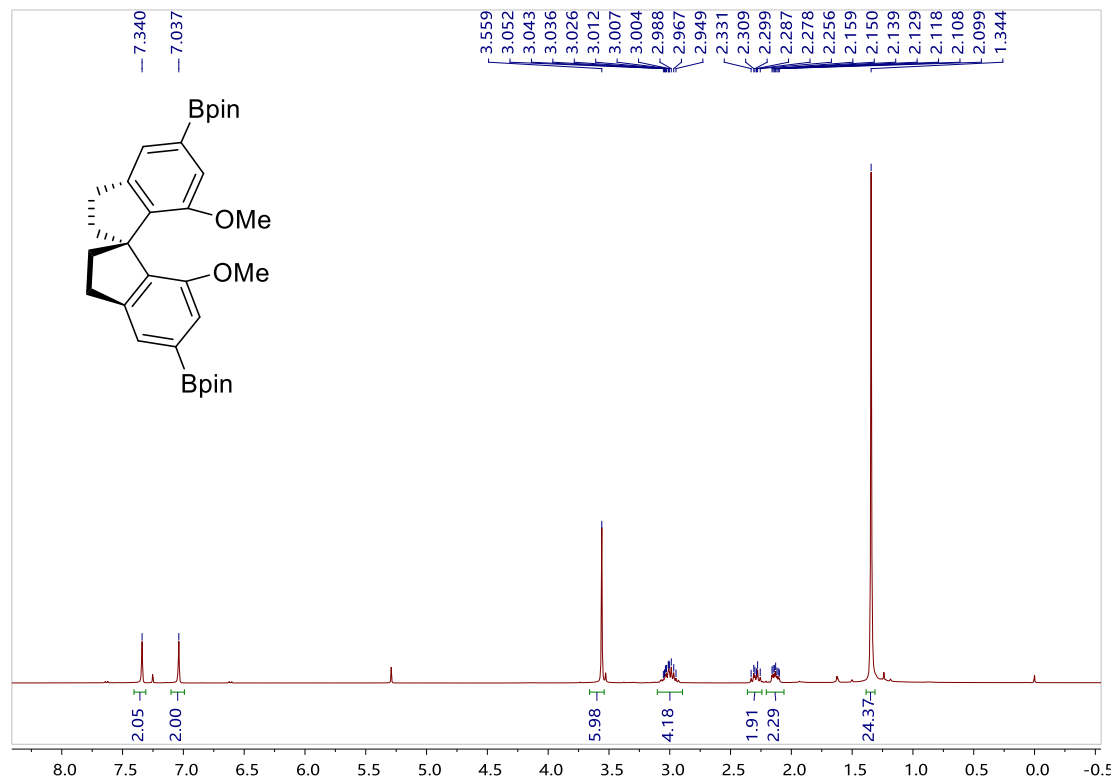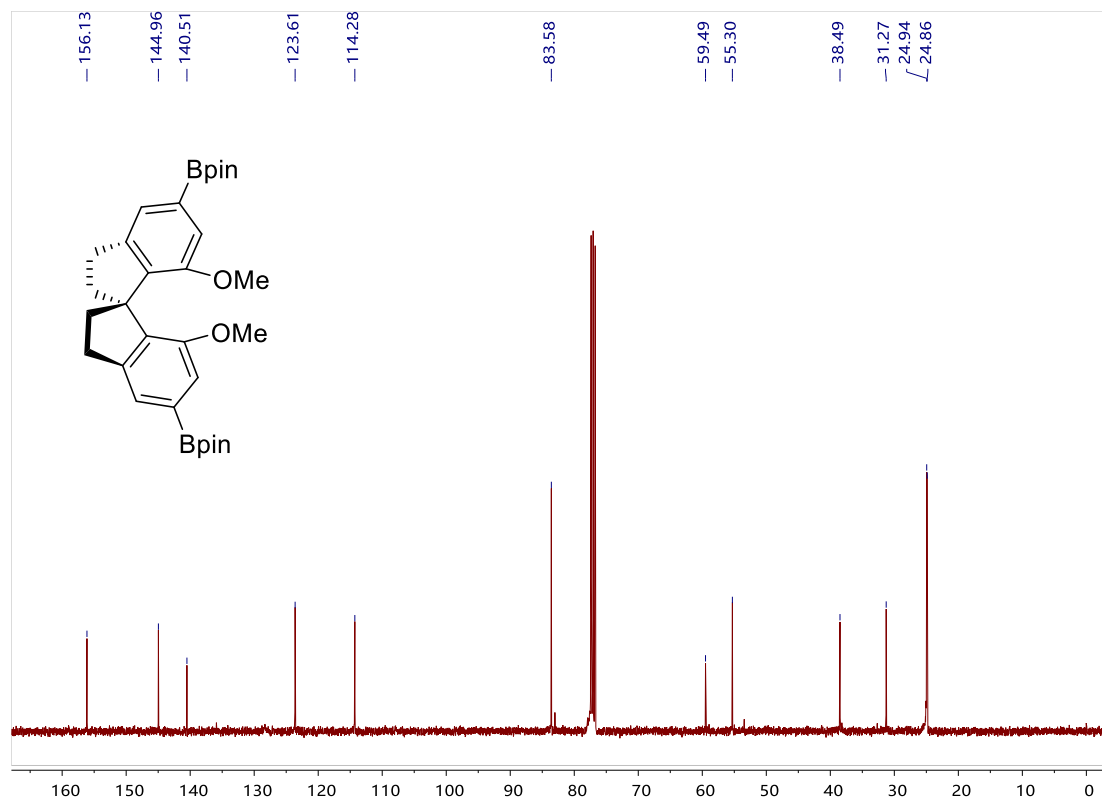

**(S)-7,7'-dimethoxy-5,5'-diphenyl-2,2',3,3'-tetrahydro-1,1'-spirobi[indene] (SI-4)**

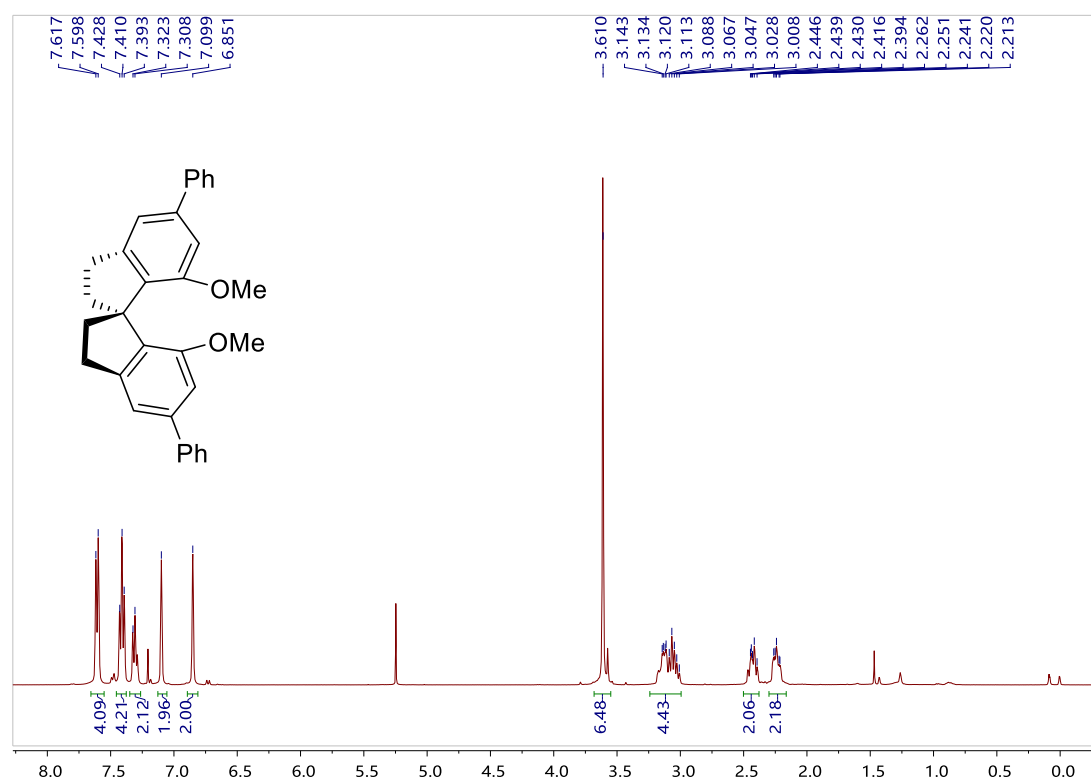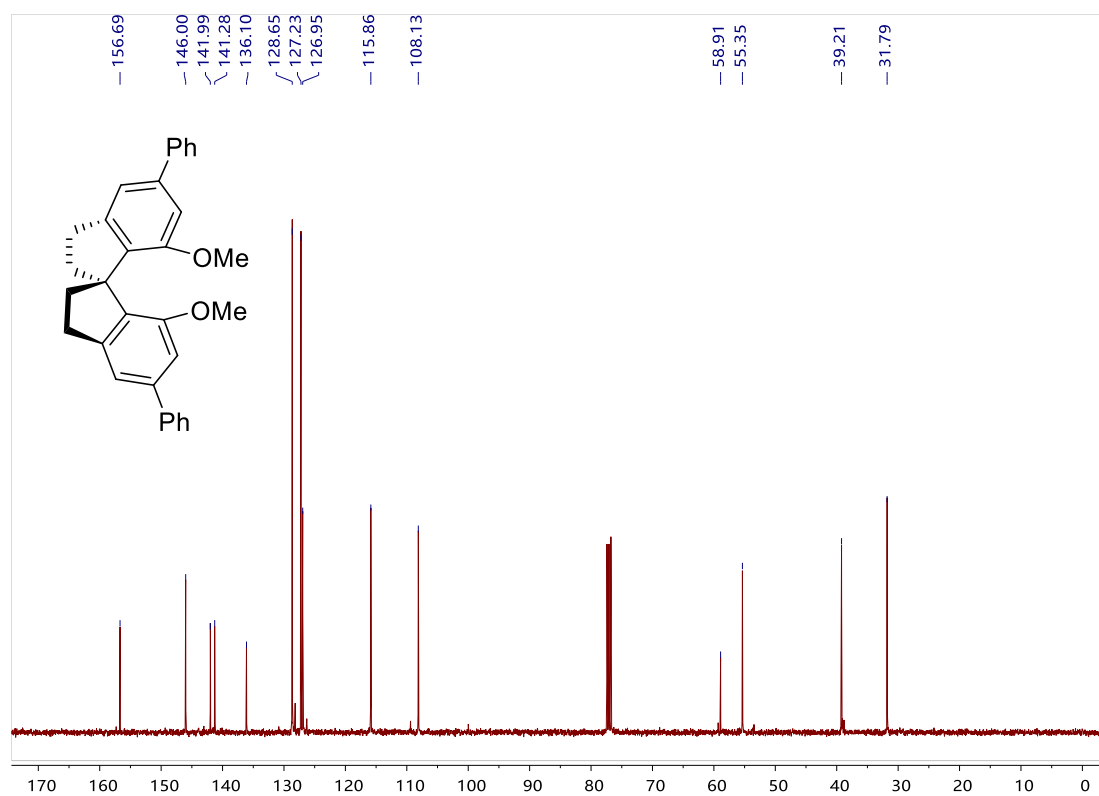

**(S)-5,5'-diphenyl-2,2',3,3'-tetrahydro-1,1'-spirobi[indene]-7,7'-diol (SI-5)**

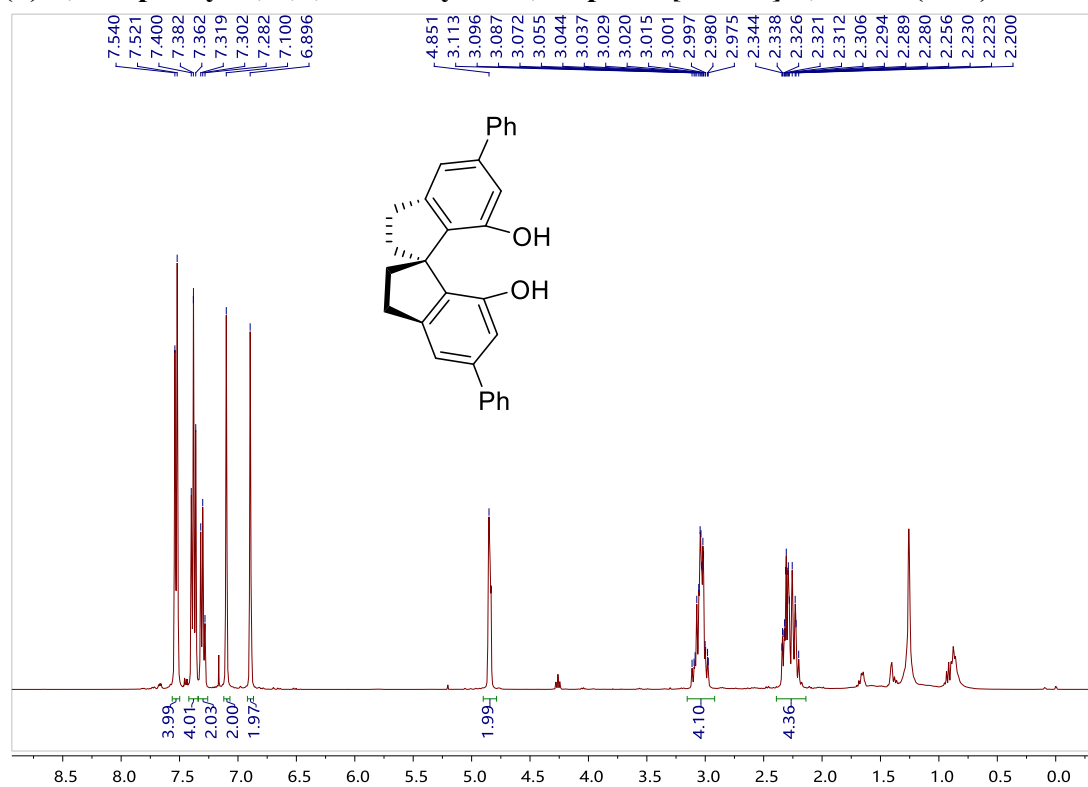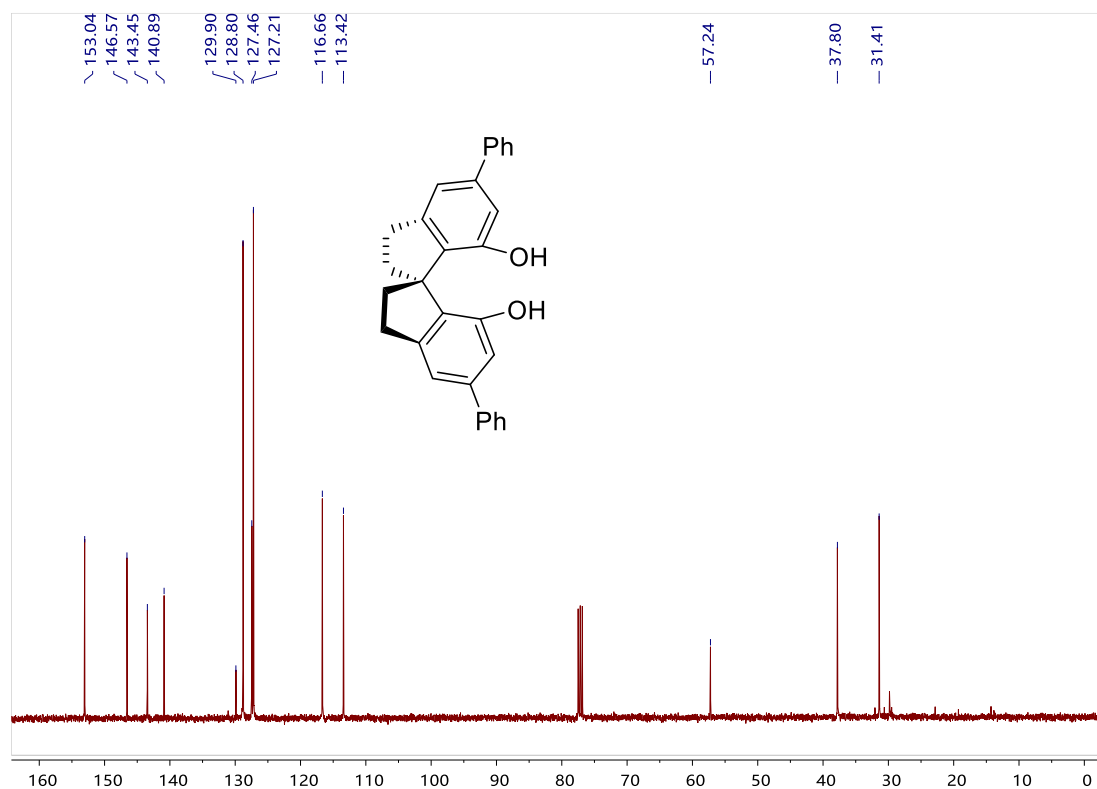

**(S)-5,5'-Diphenyl-1,1'-spirobiindanyl-7,7'-diyl-hydrogenphosphate (SI-6)**

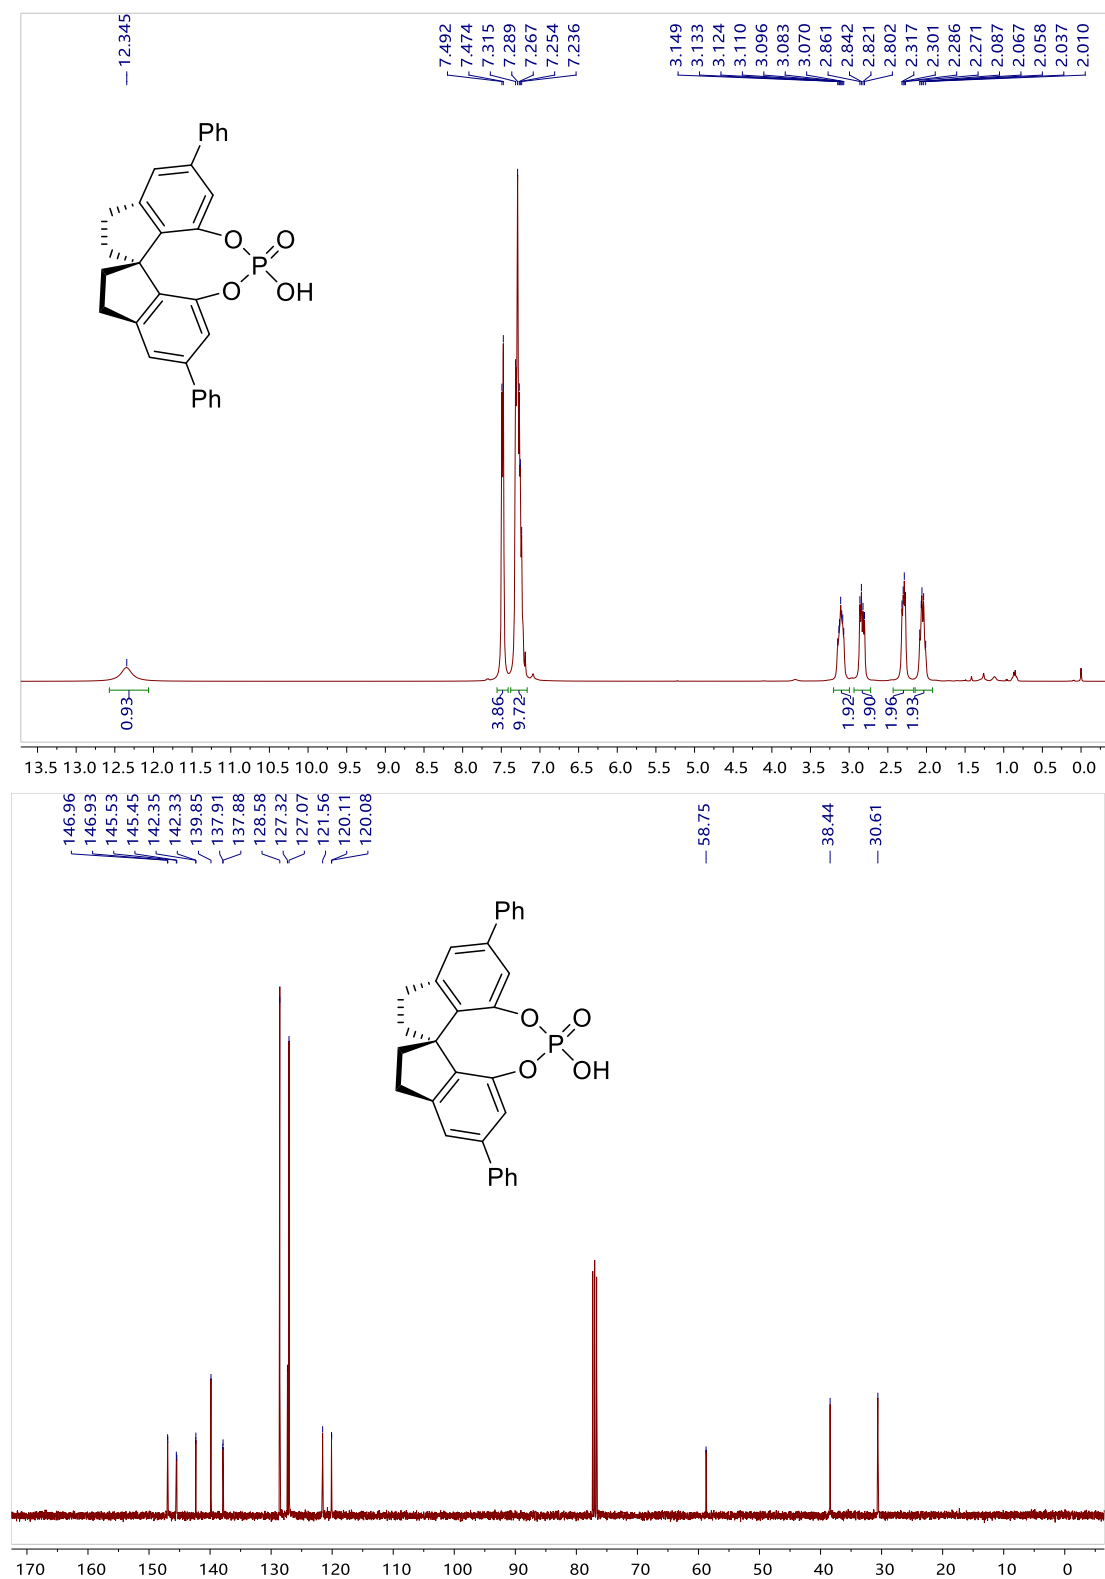

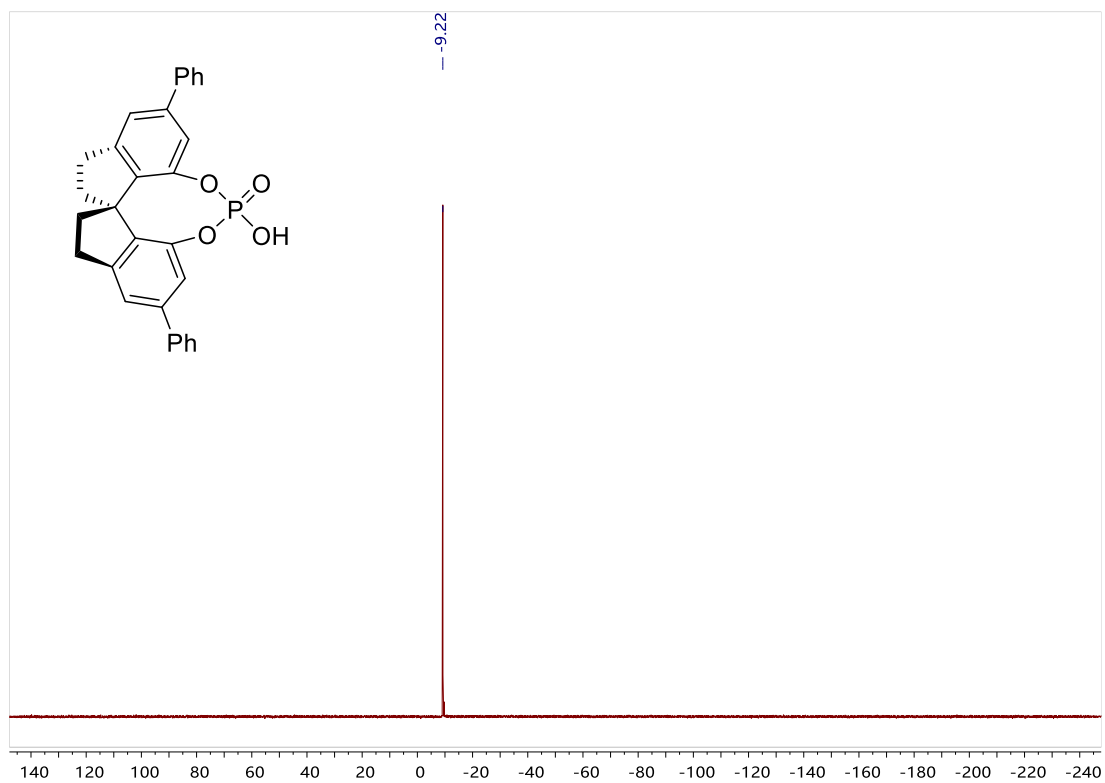



**Tetrakis[(*S*)-5,5'-diphenyl-1,1'-spirobiindanyl-7,7'-diyl-phosphate] dirhodium (II)  
(C2)**

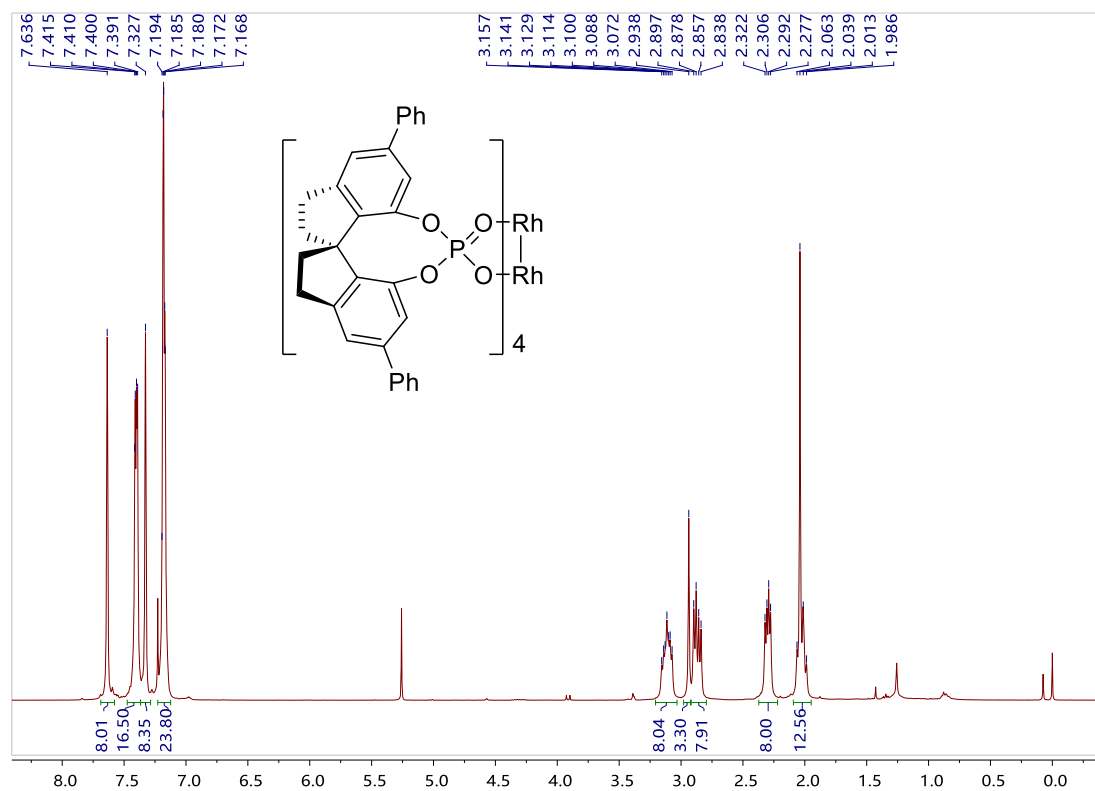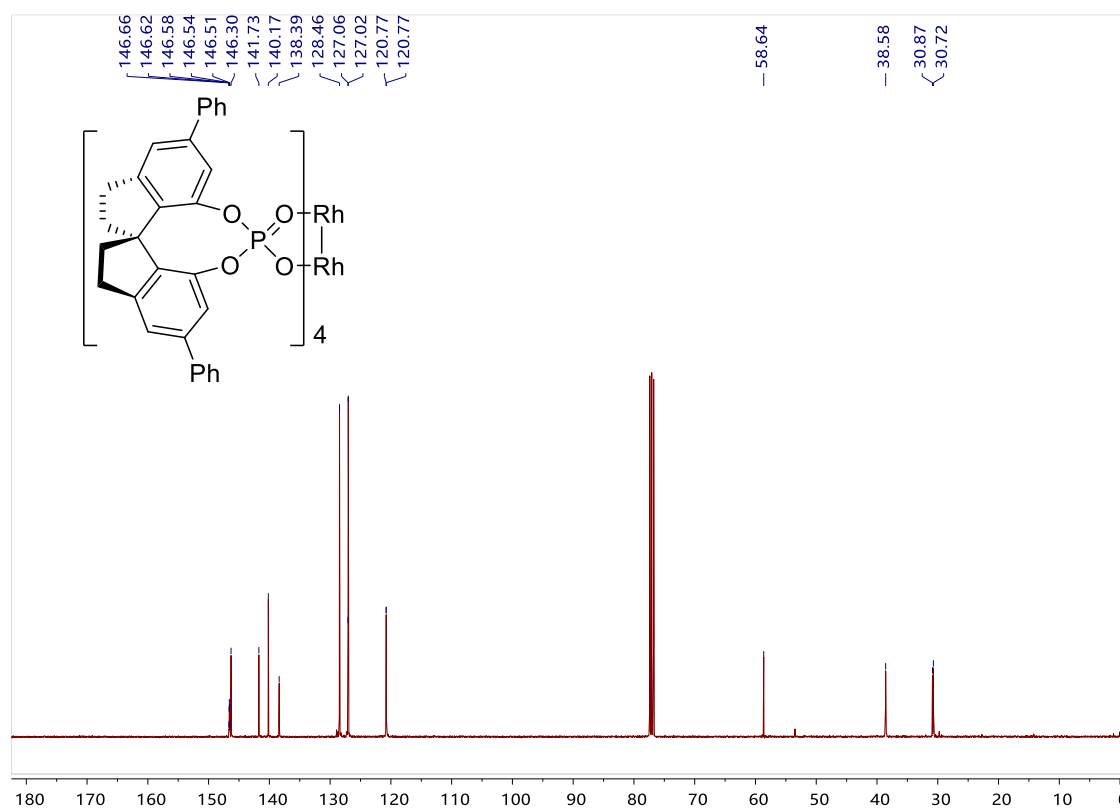

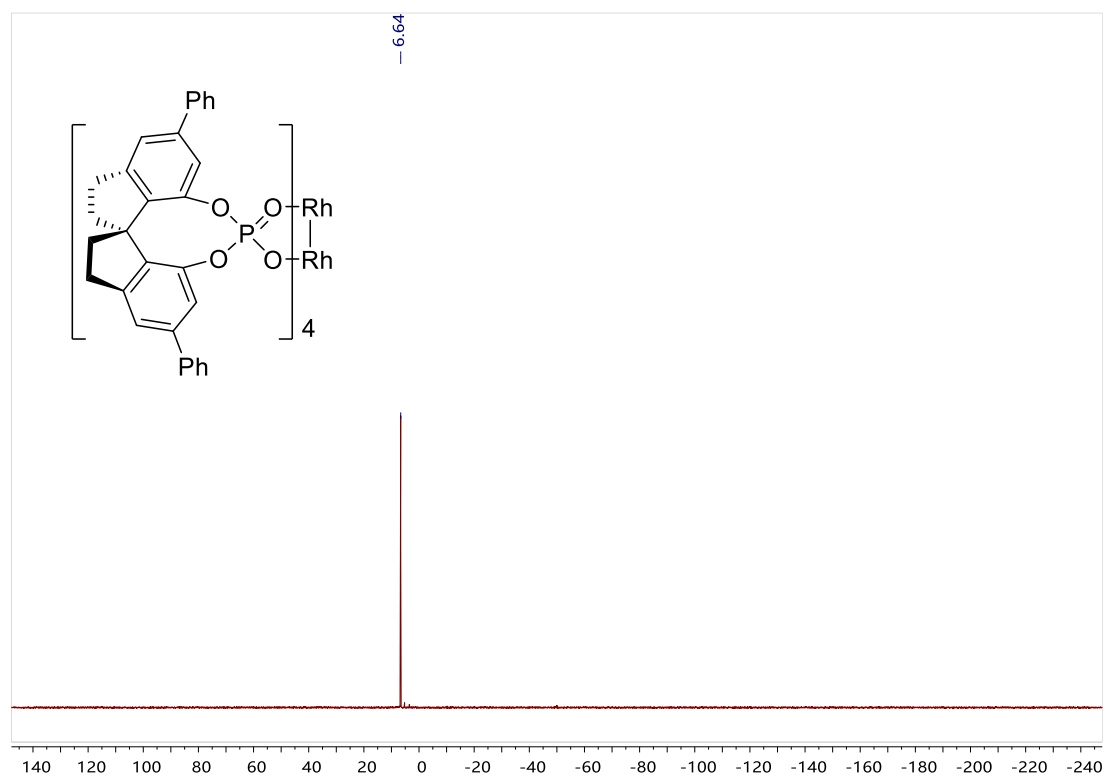

**(S)-5,5'-bis(3,5-dimethylphenyl)-7,7'-dimethoxy-2,2',3,3'-tetrahydro-1,1'-spirobi[indene] (SI-7)**

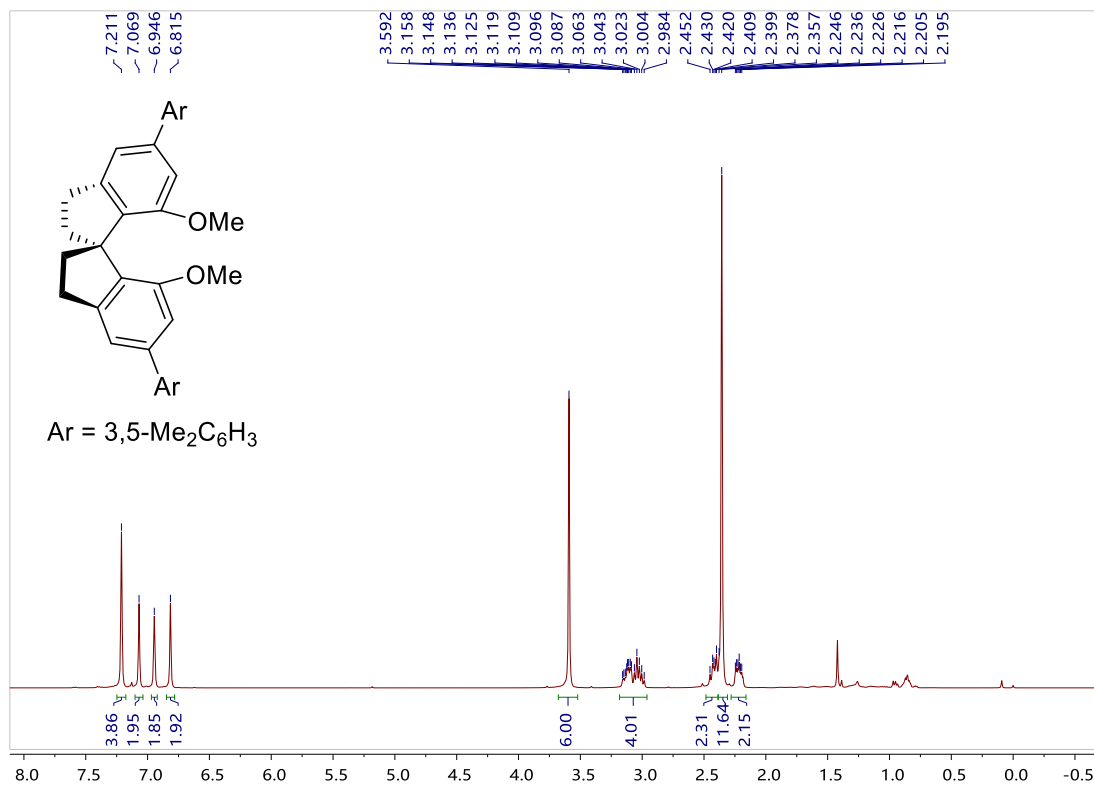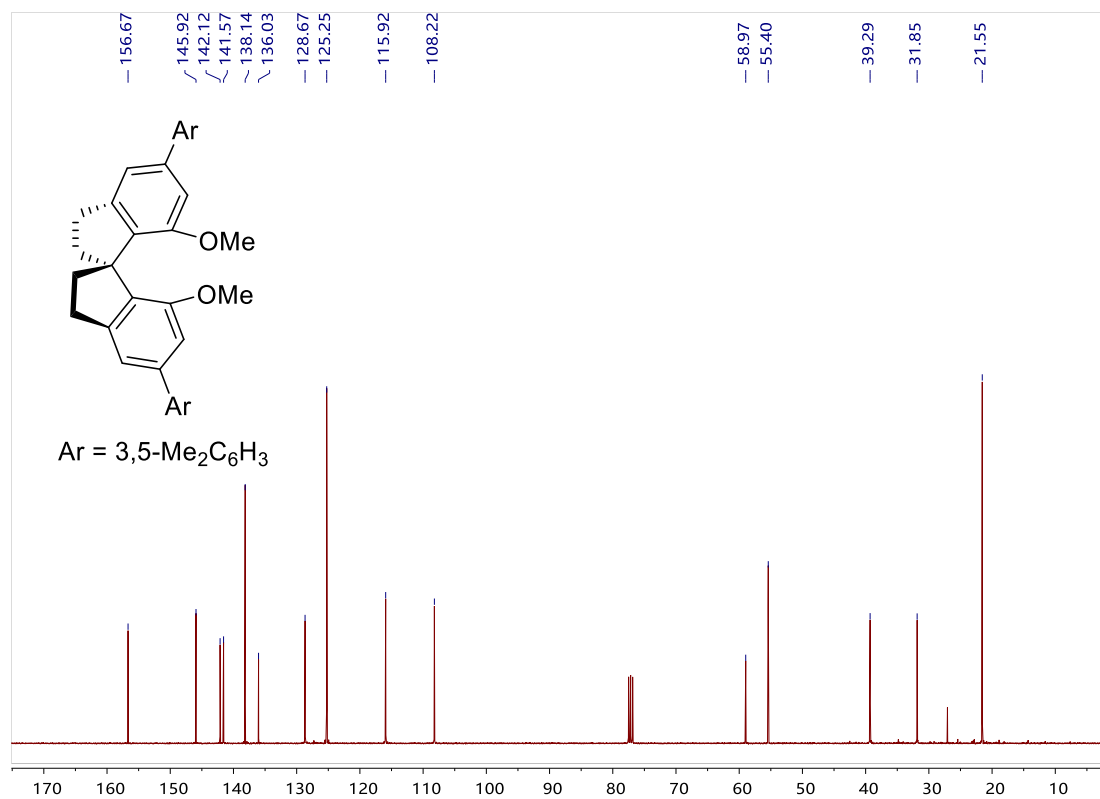

**(S)-5,5'-bis(3,5-dimethylphenyl)-2,2',3,3'-tetrahydro-1,1'-spirobi[indene]-7,7'-diol (SI-8)**

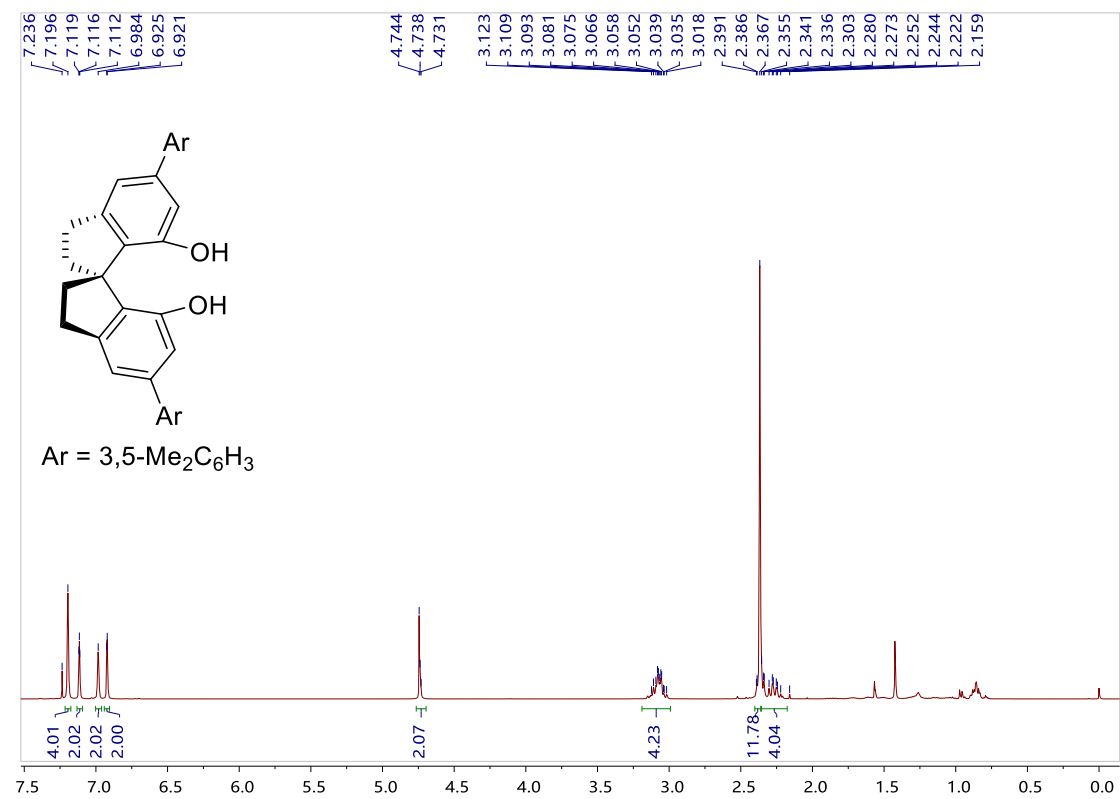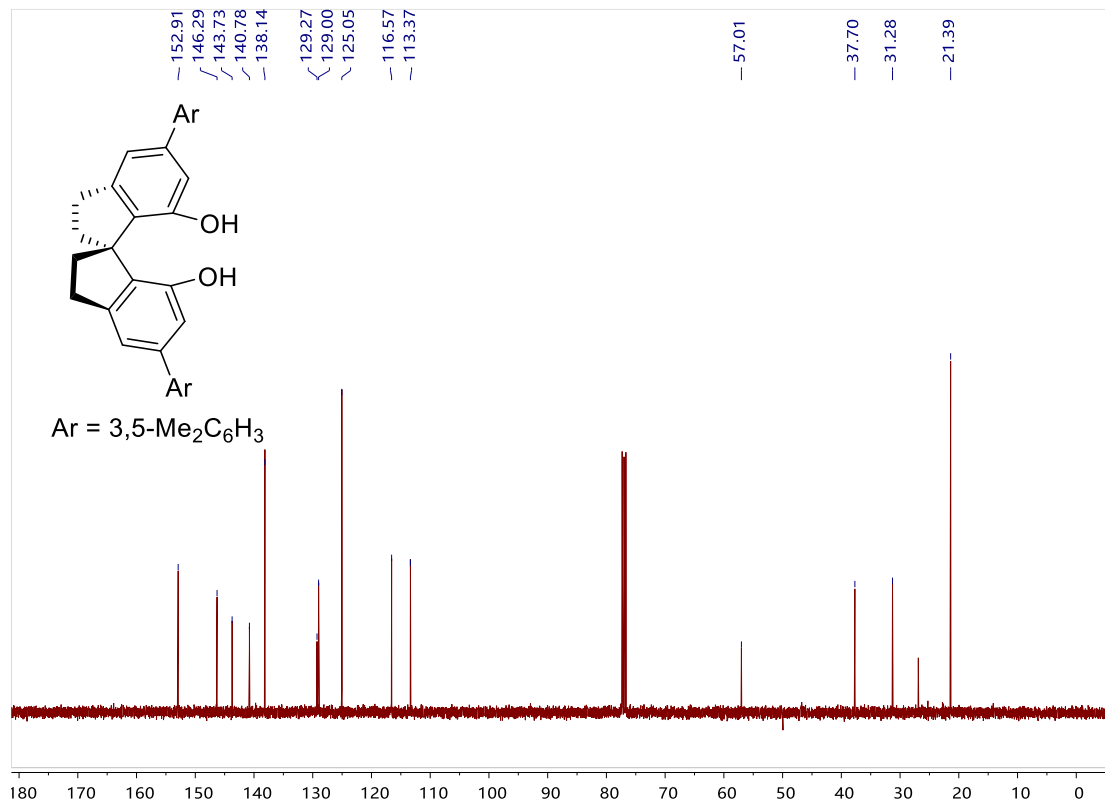

**(S)-5,5'-bis(3,5-dimethylphenyl)-1,1'-spirobiindanyl-7,7'-diyl-hydrogenphosphate (SI-9)**

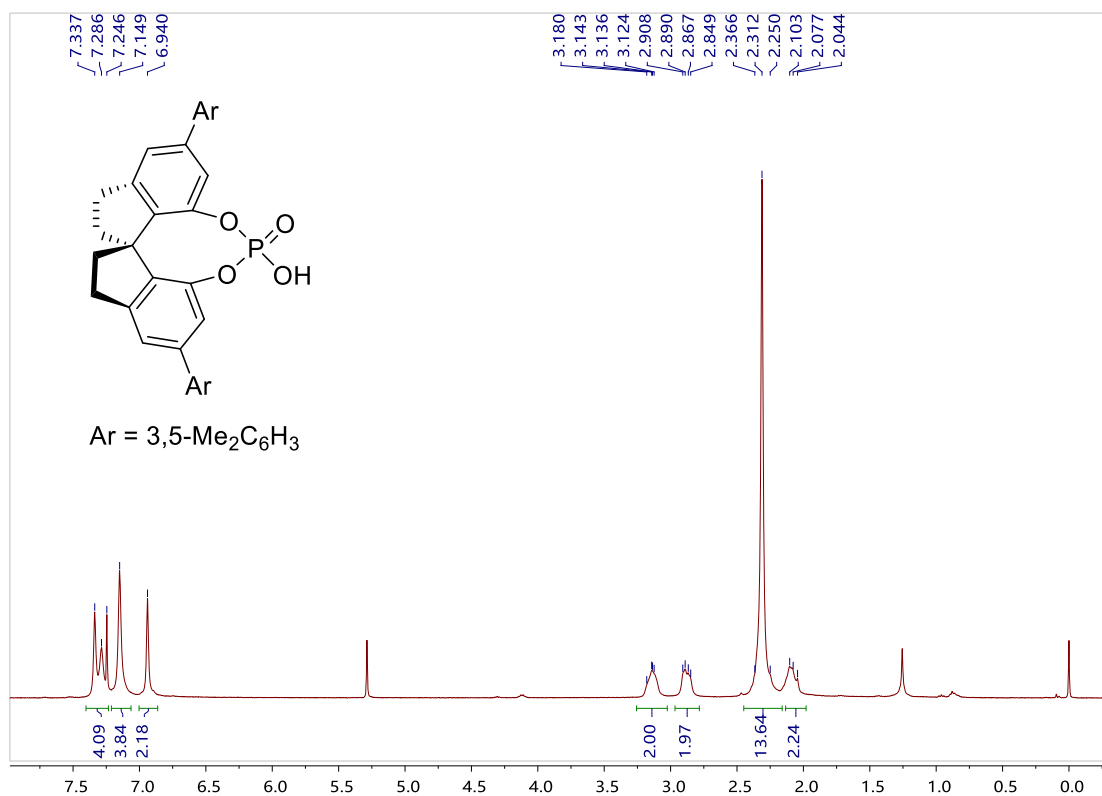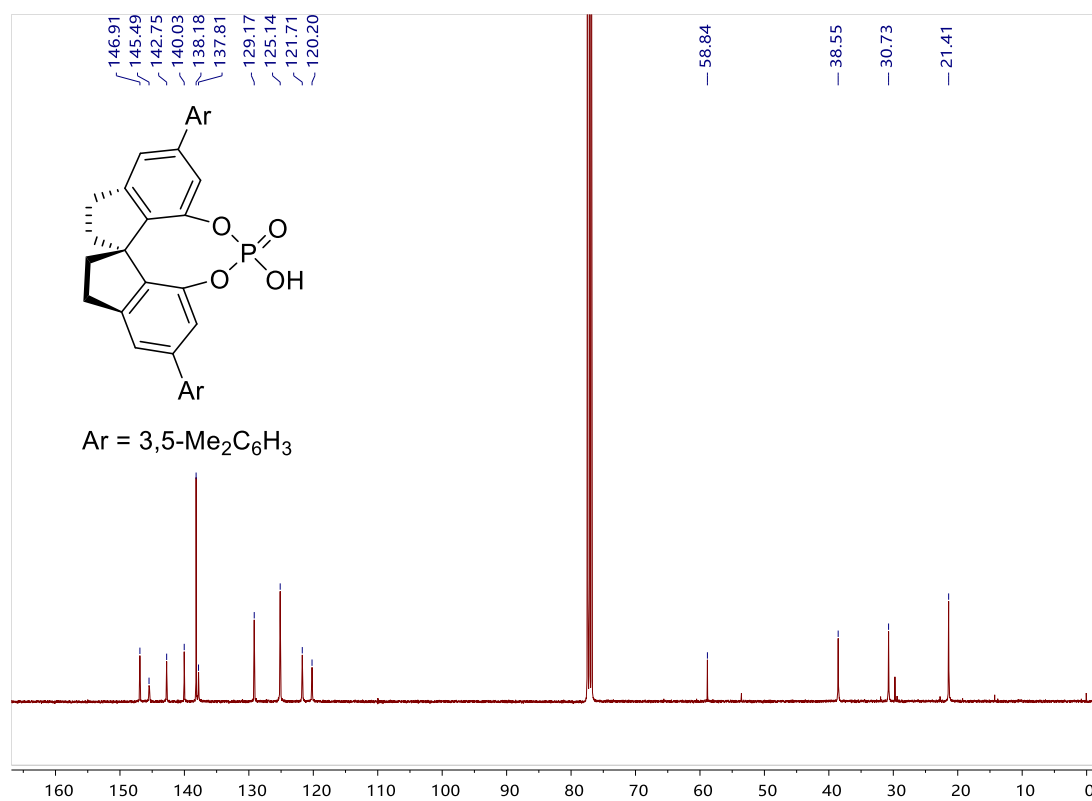

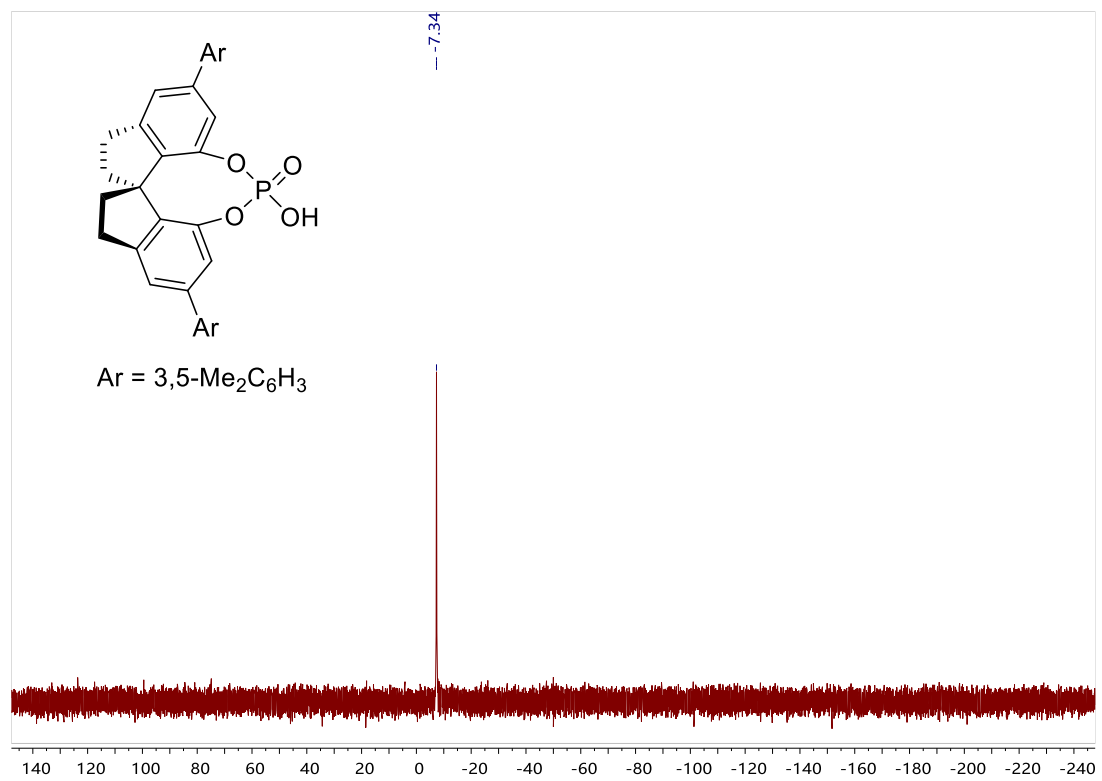

**Tetrakis[(*S*)-5,5'-bis(3,5-dimethylphenyl)-1,1'-spirobiindanyl-7,7'-diyl-phosphate]dirhodium (II) (C3)**

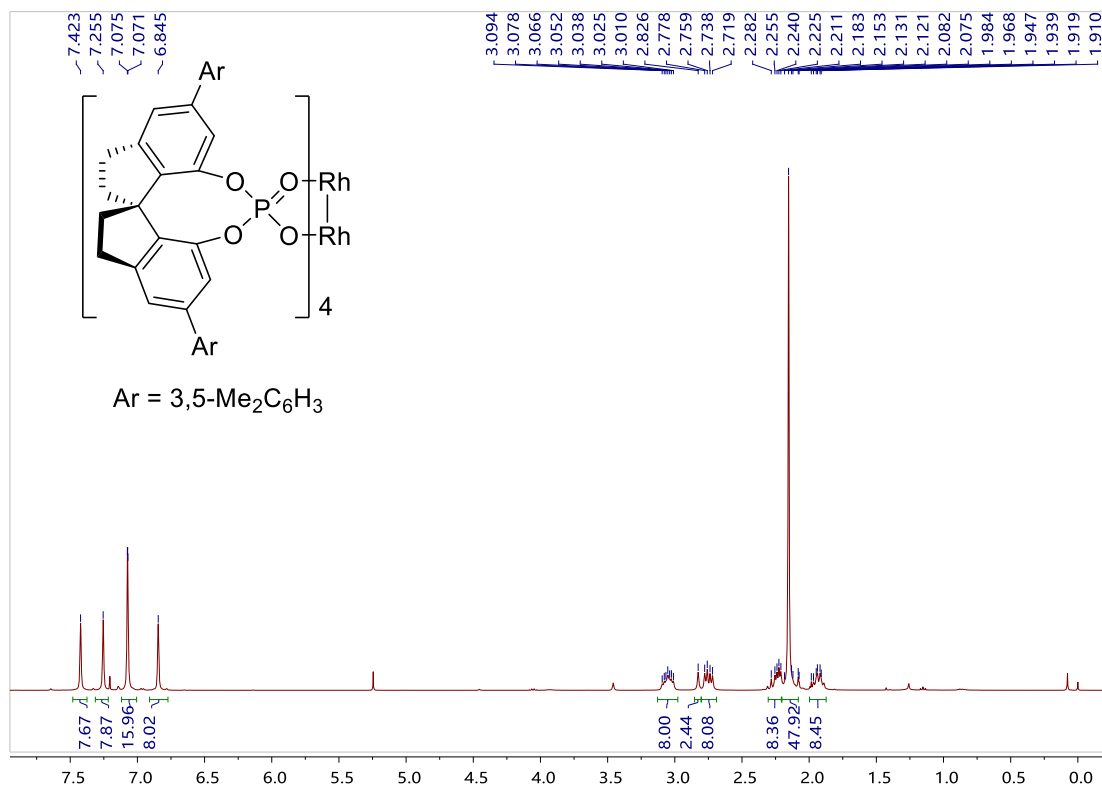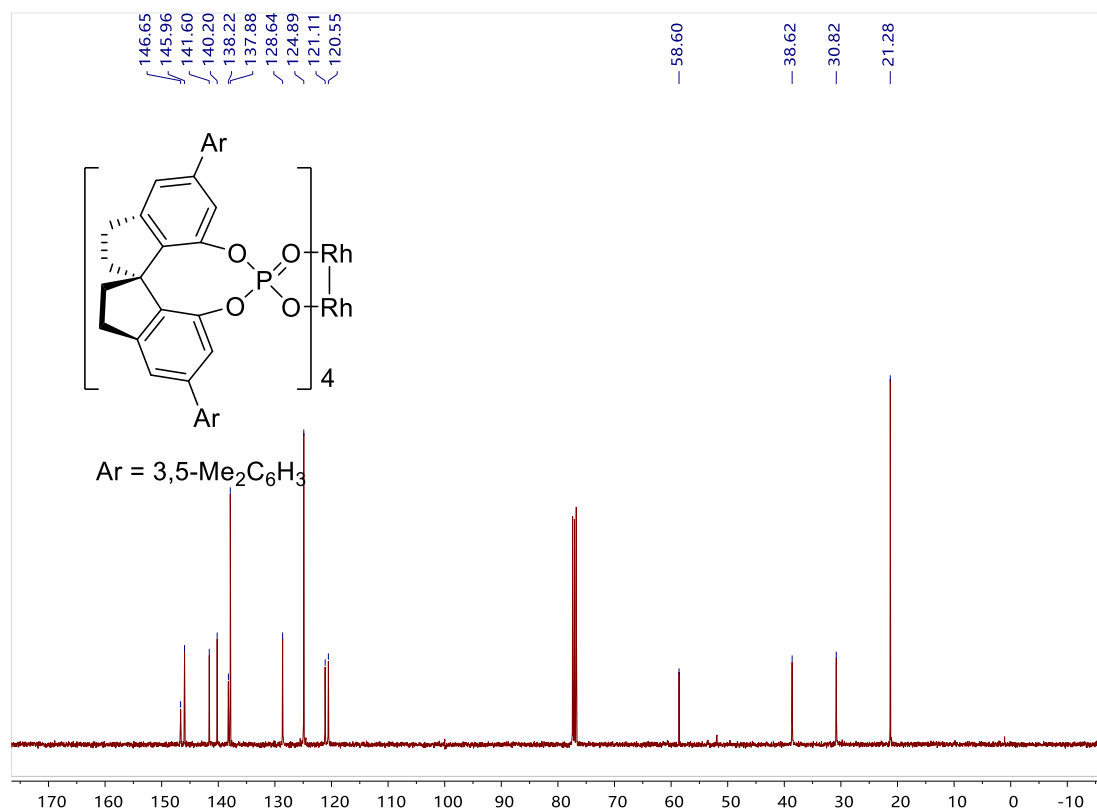

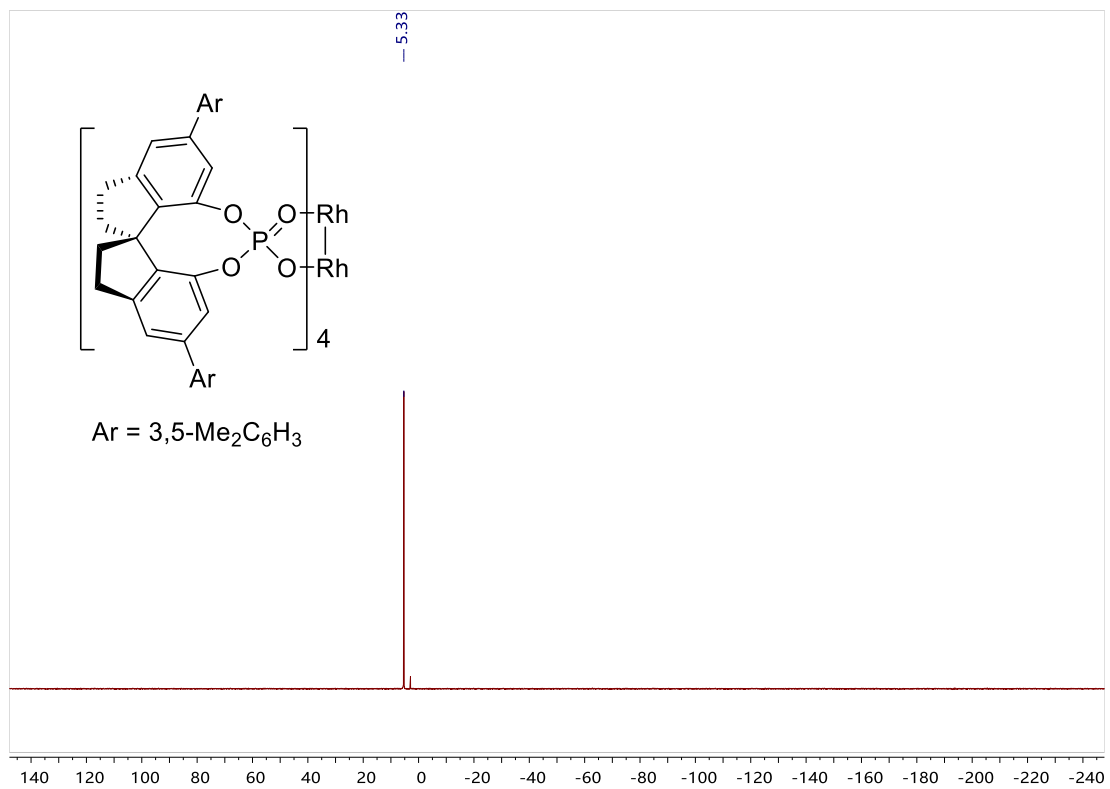



**(S)-4,4'- dibromo-1,1'-spirobiindanyl-7,7'-diyl-hydrogenphosphate (SI-12)**

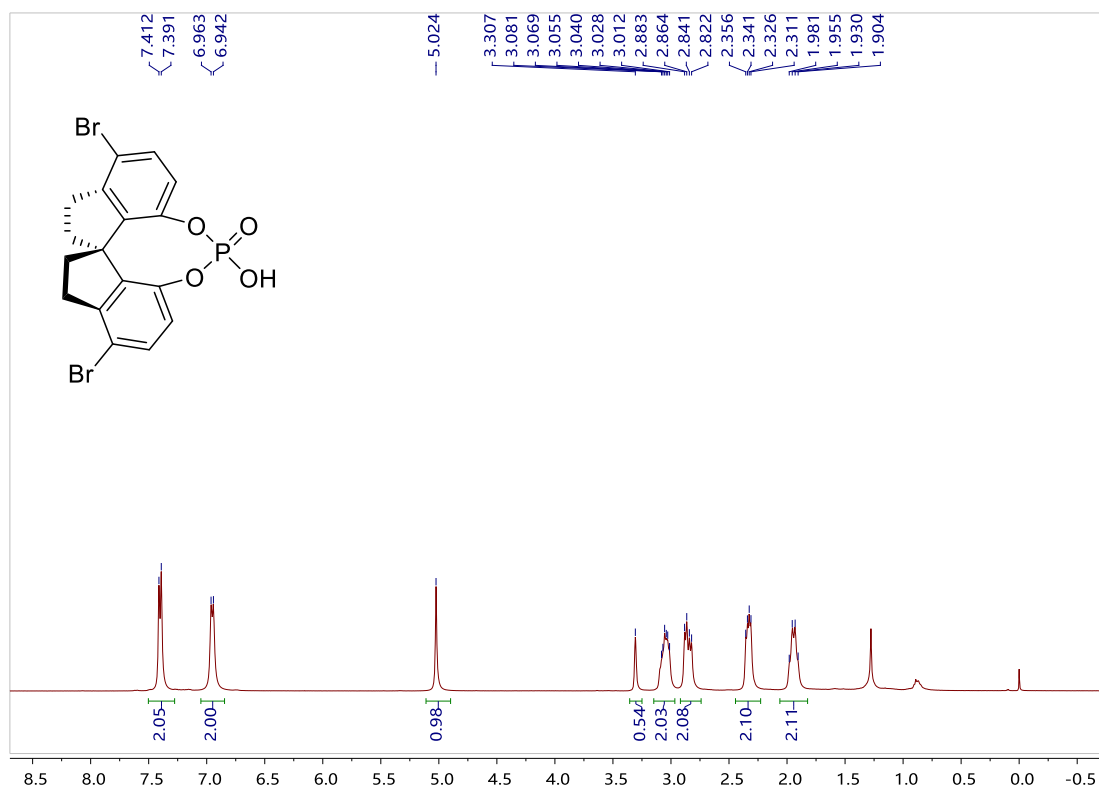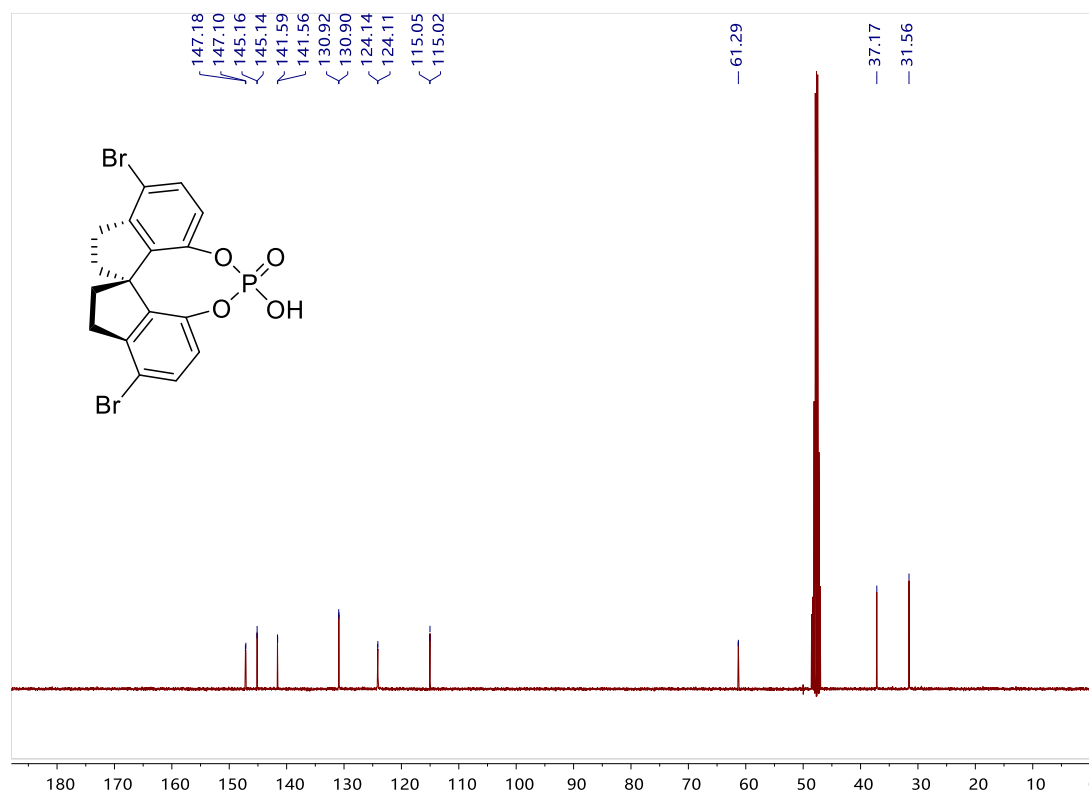

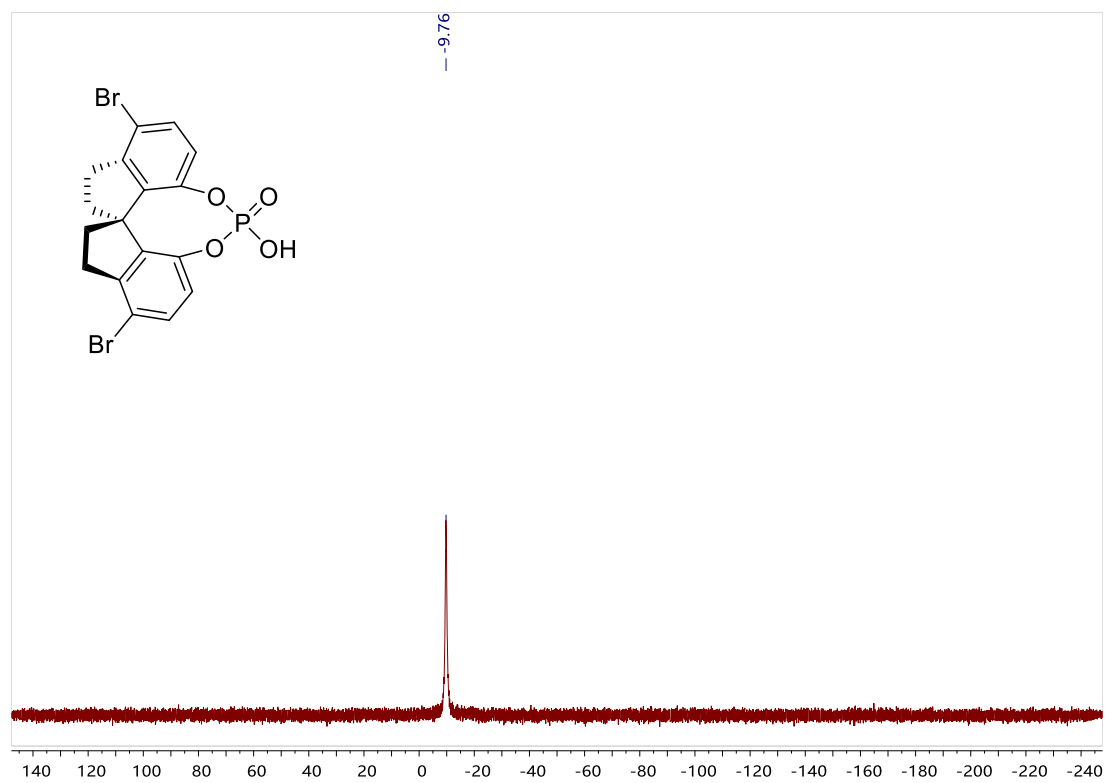

**Tetrakis[(S)-4,4'-dibromo-1,1'-spirobiindanyl-7,7'-diyl-phosphate] dirhodium (II)  
(C4)**

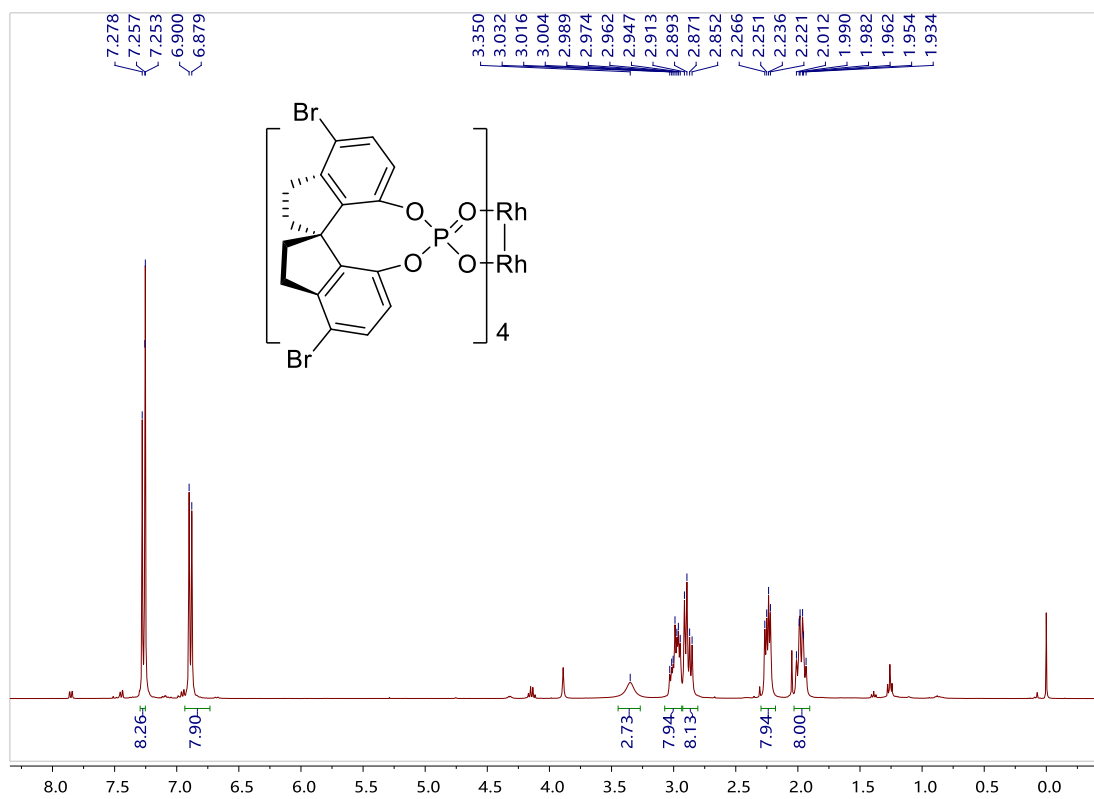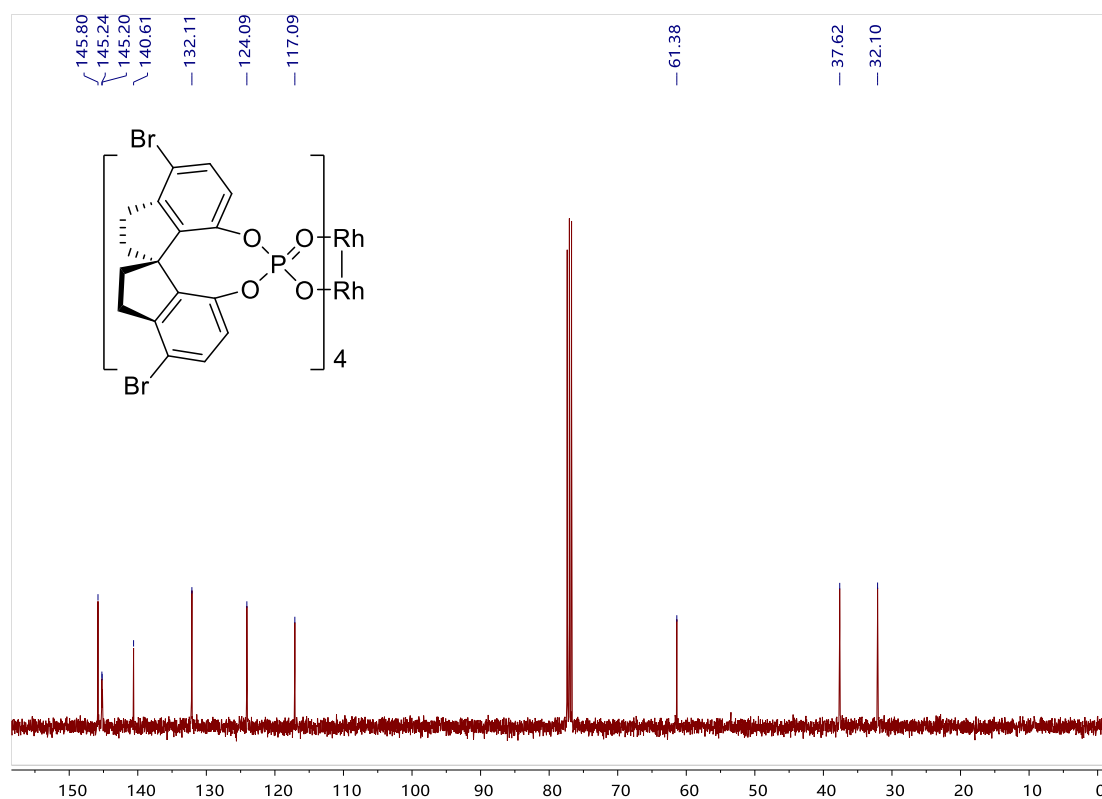

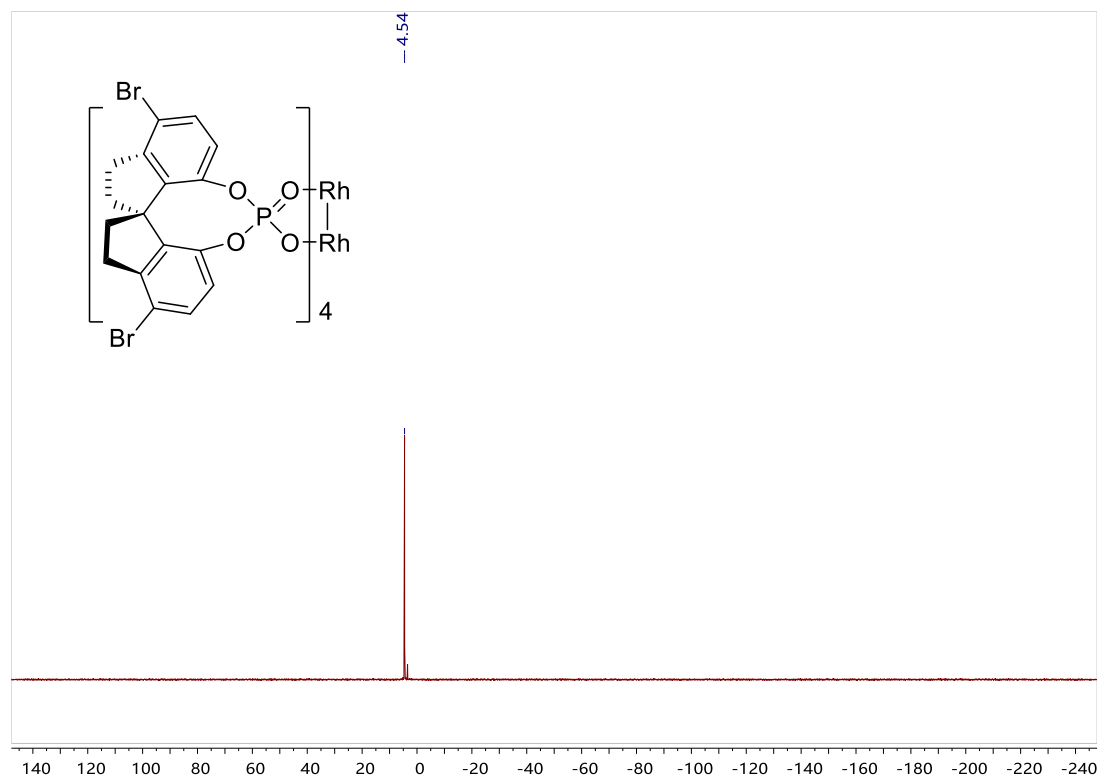

**(S)-4,4'- diphenyl-1,1'-spirobiindanyl-7,7'-diyl-hydrogenphosphate (SI-13)**

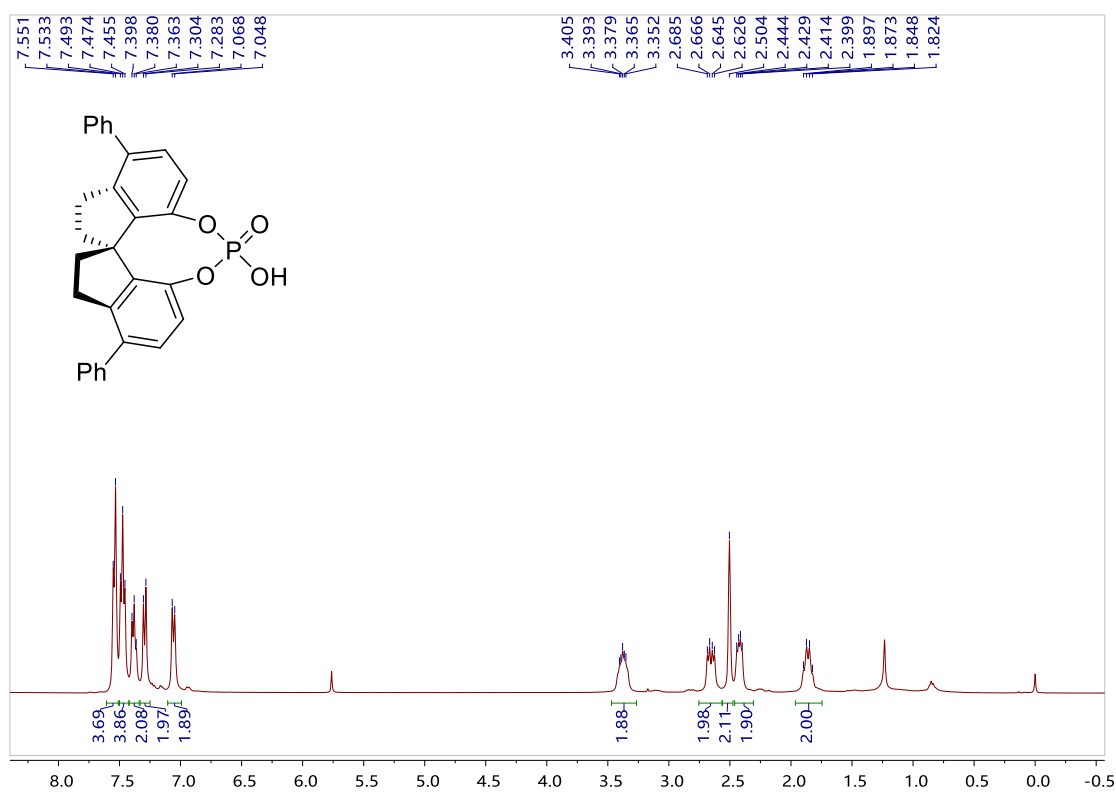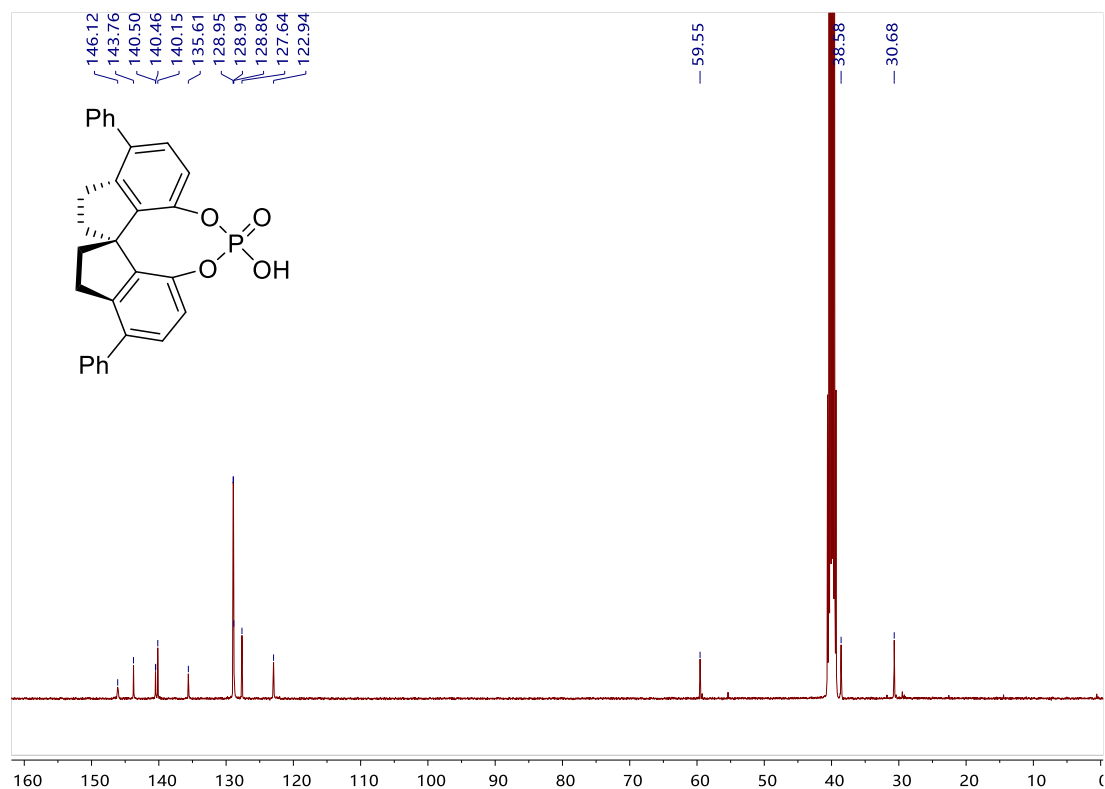

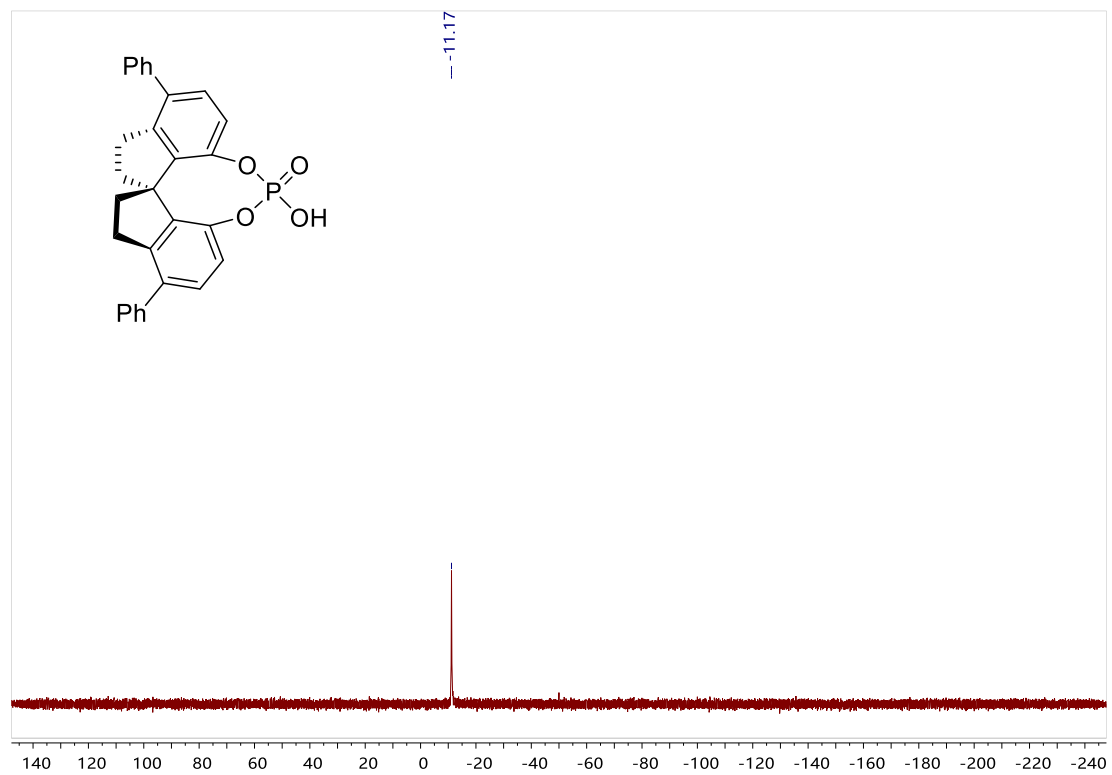

**Tetrakis[(S)-4,4'-diphenyl-1,1'-spirobiindanyl-7,7'-diyl-phosphate] dirhodium (II)**  
**(C5)**

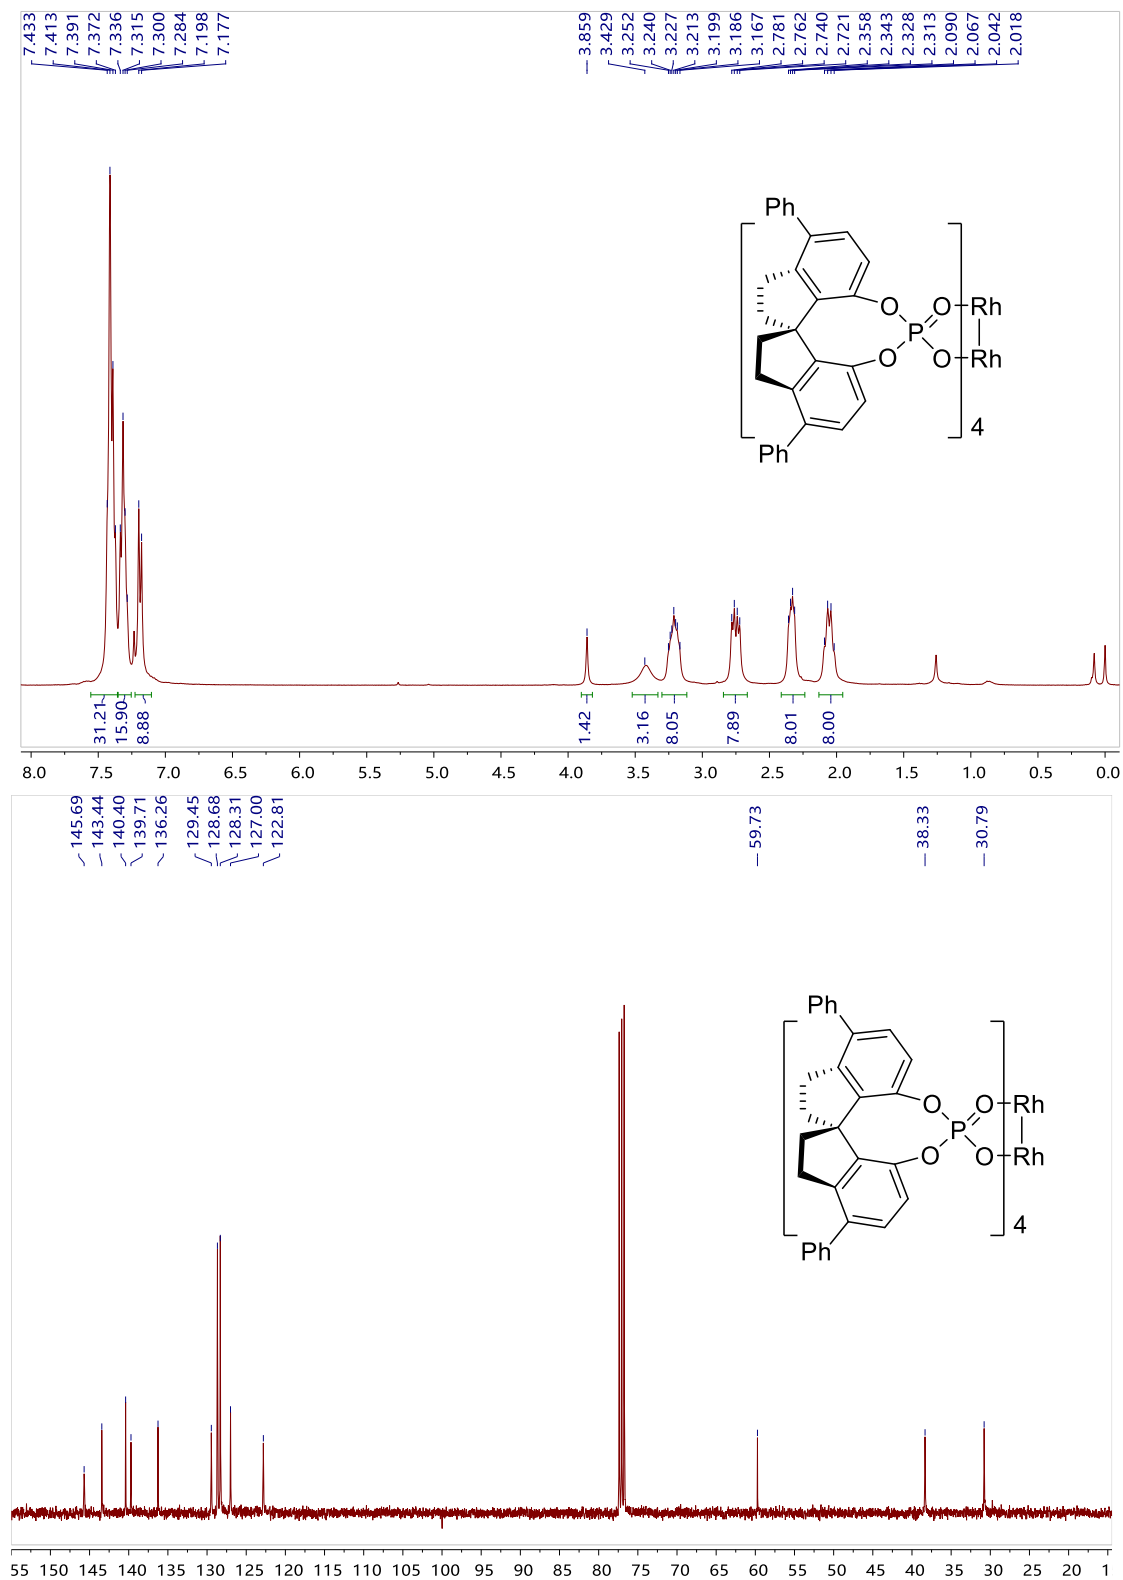

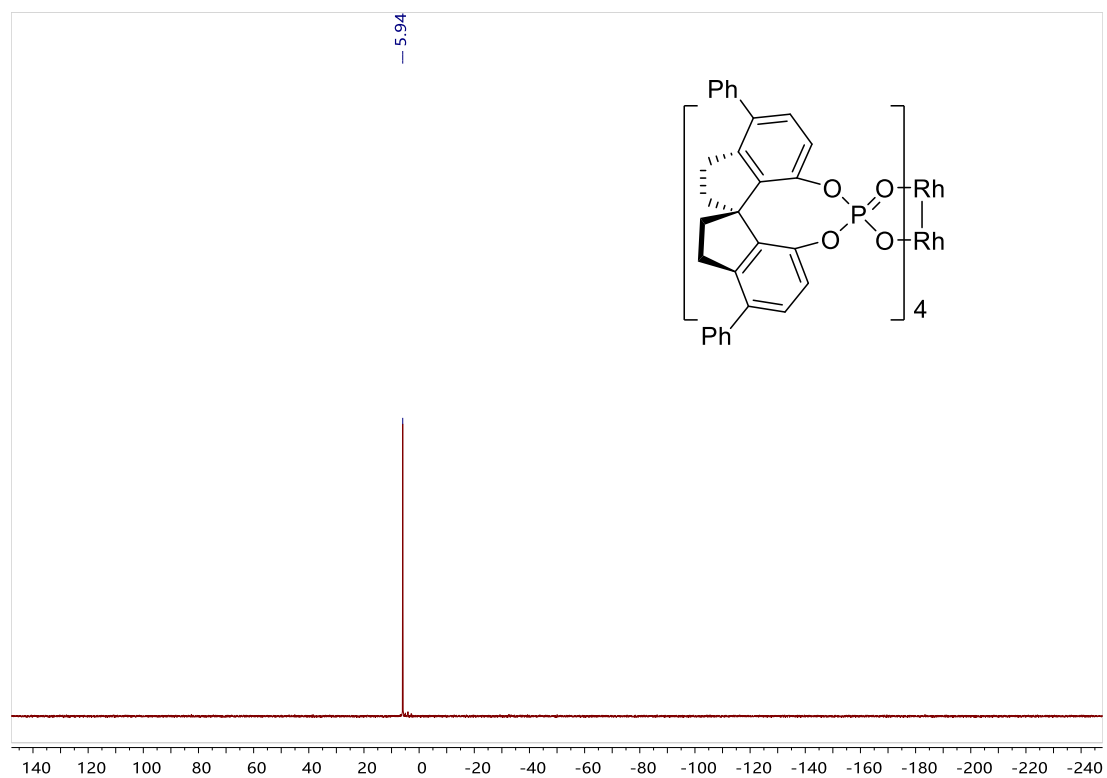



**(-)-dimethyl((4-nitrophenyl)(phenyl)methyl)(phenyl)silane (P1)**

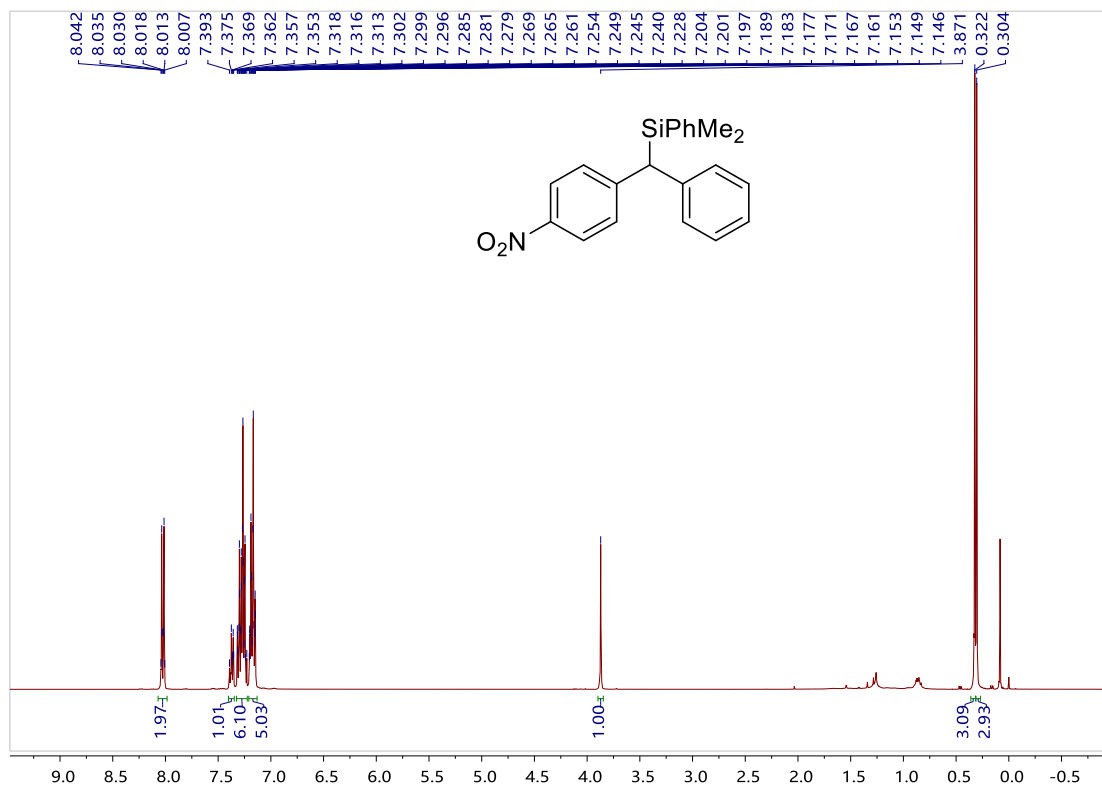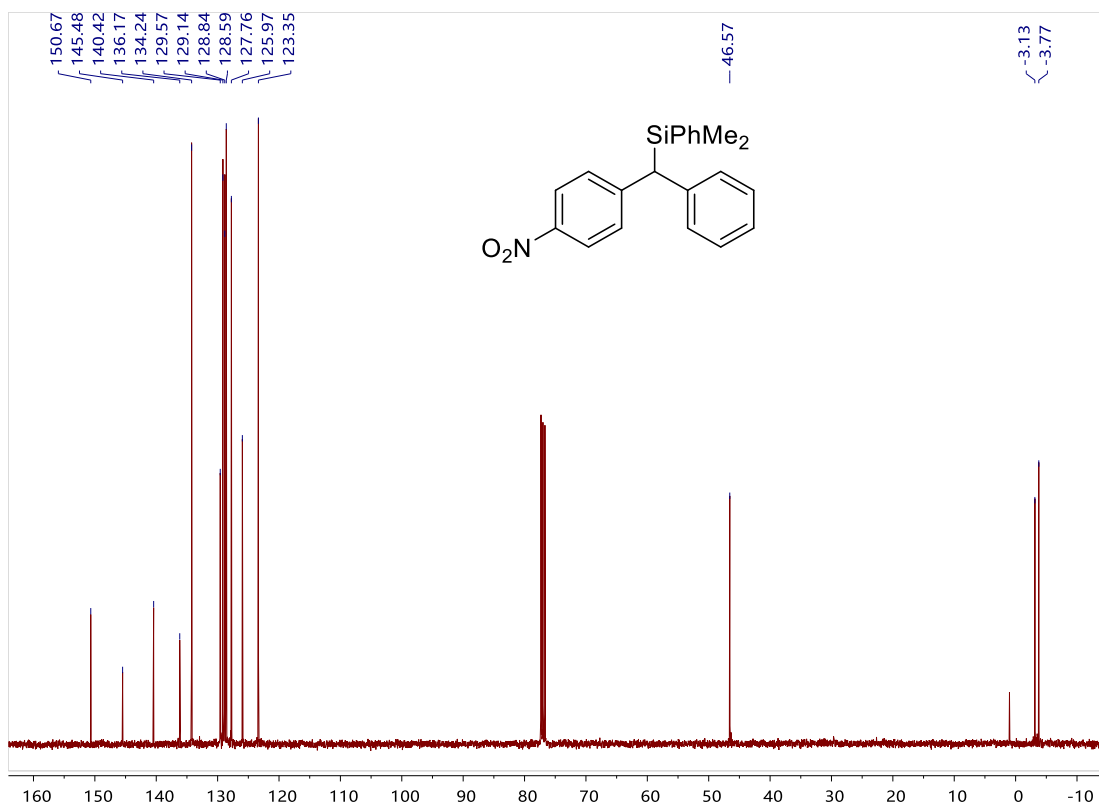

**(-)-4-((dimethyl(phenyl)silyl)(phenyl)methyl)benzonitrile (P2)**

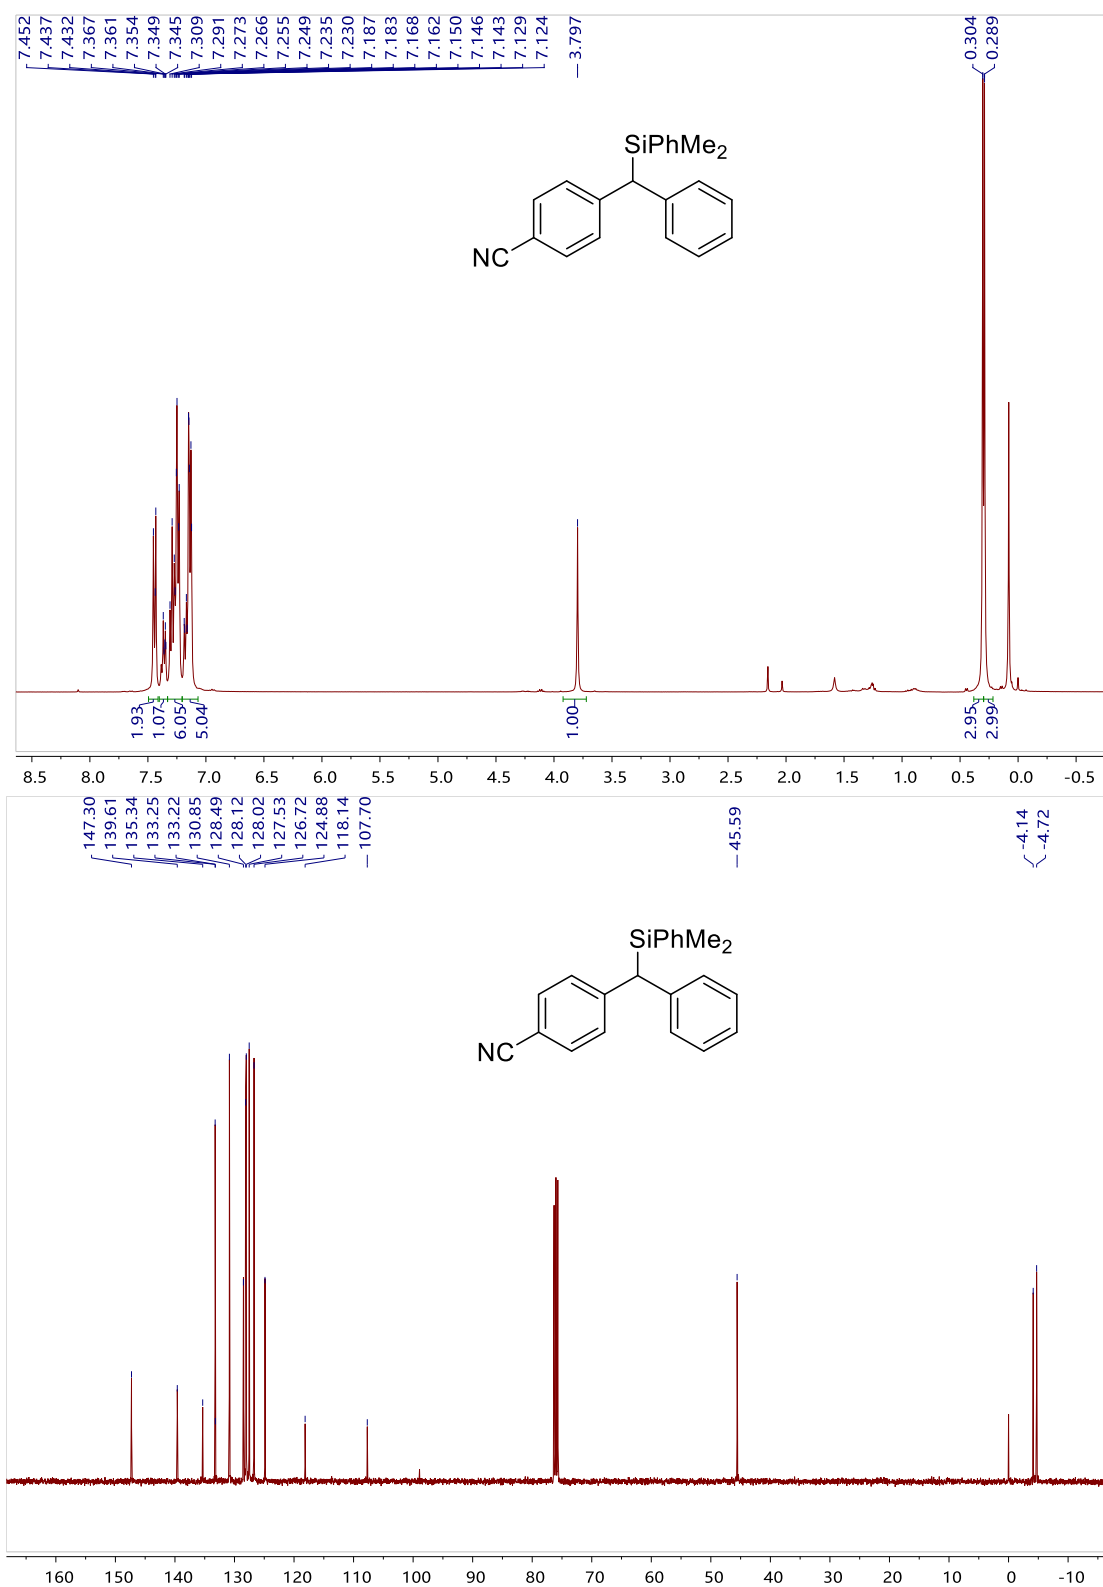

**(S)-dimethyl(phenyl)(phenyl(4-(trifluoromethyl)phenyl)methyl)silane (P3)**

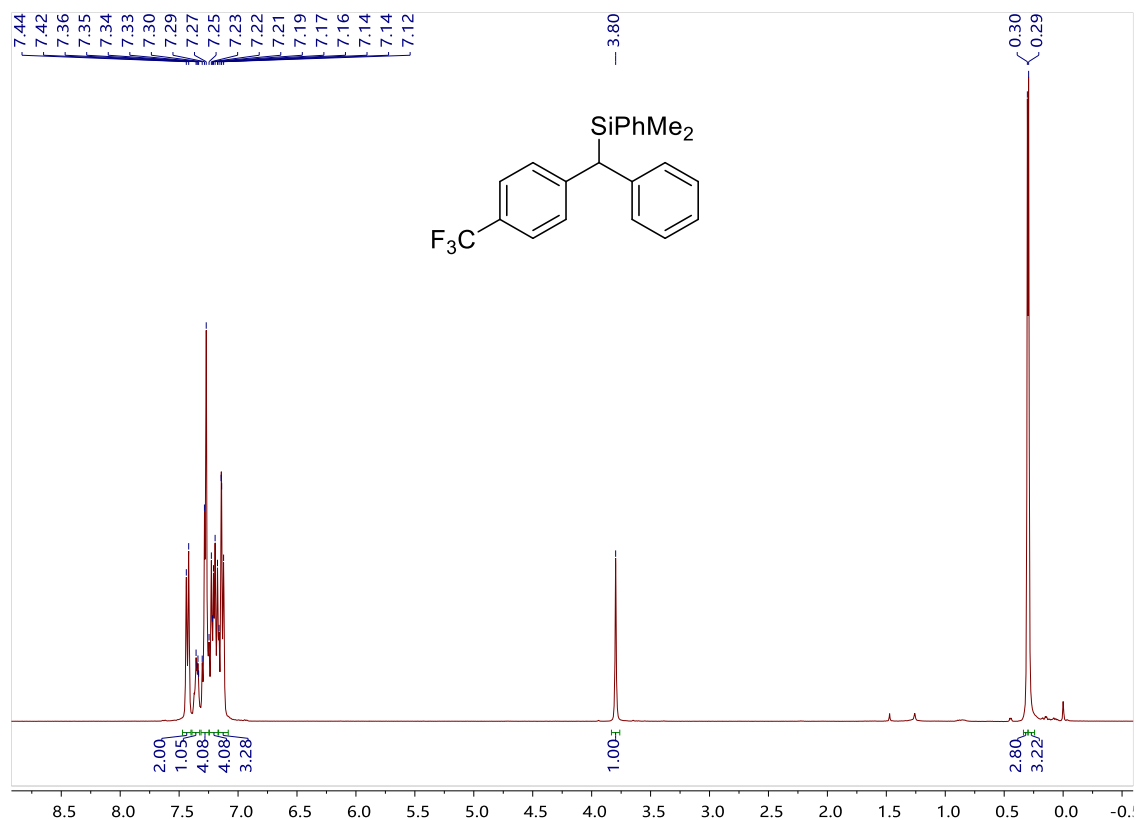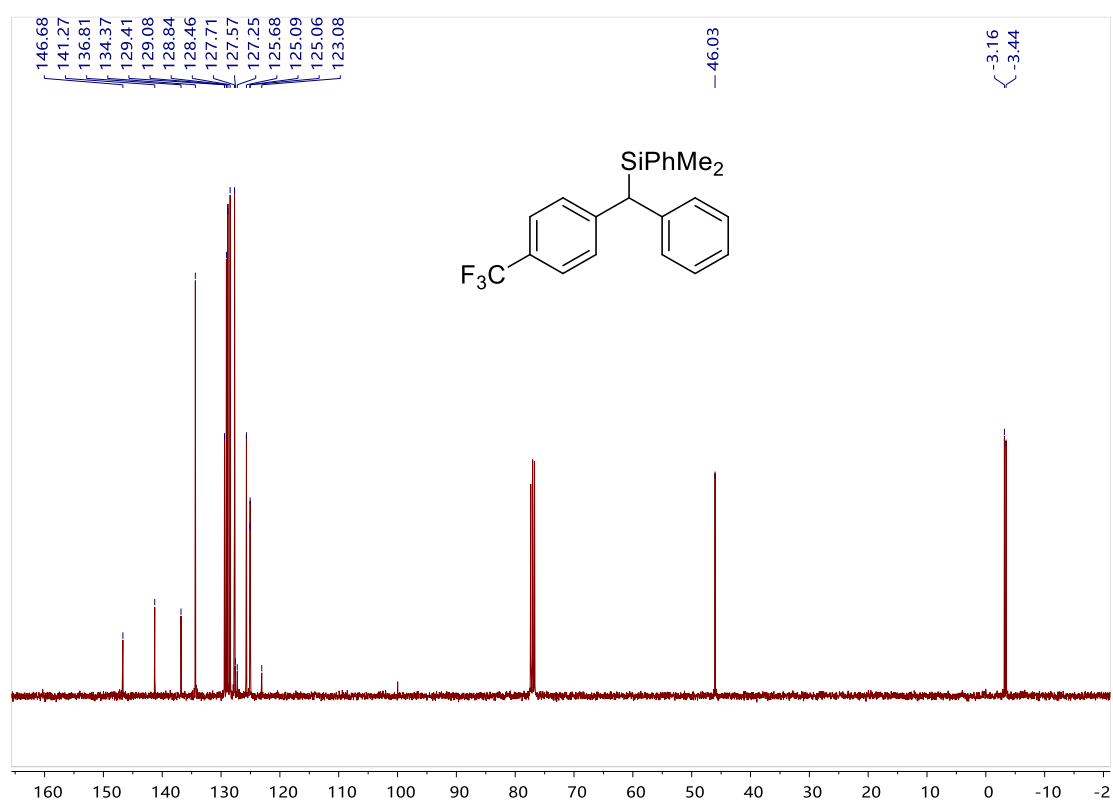

**(-)-dimethyl(phenyl)(phenyl(4-((trifluoromethyl)thio)phenyl)methyl)silane (P4)**

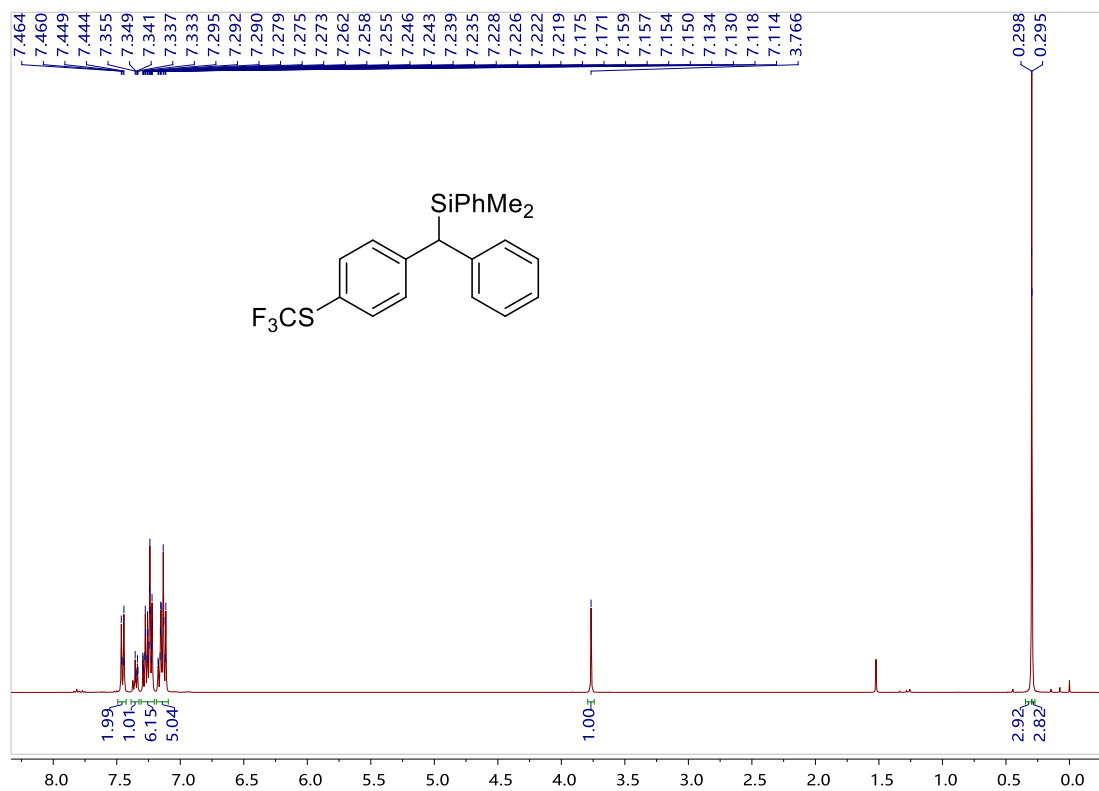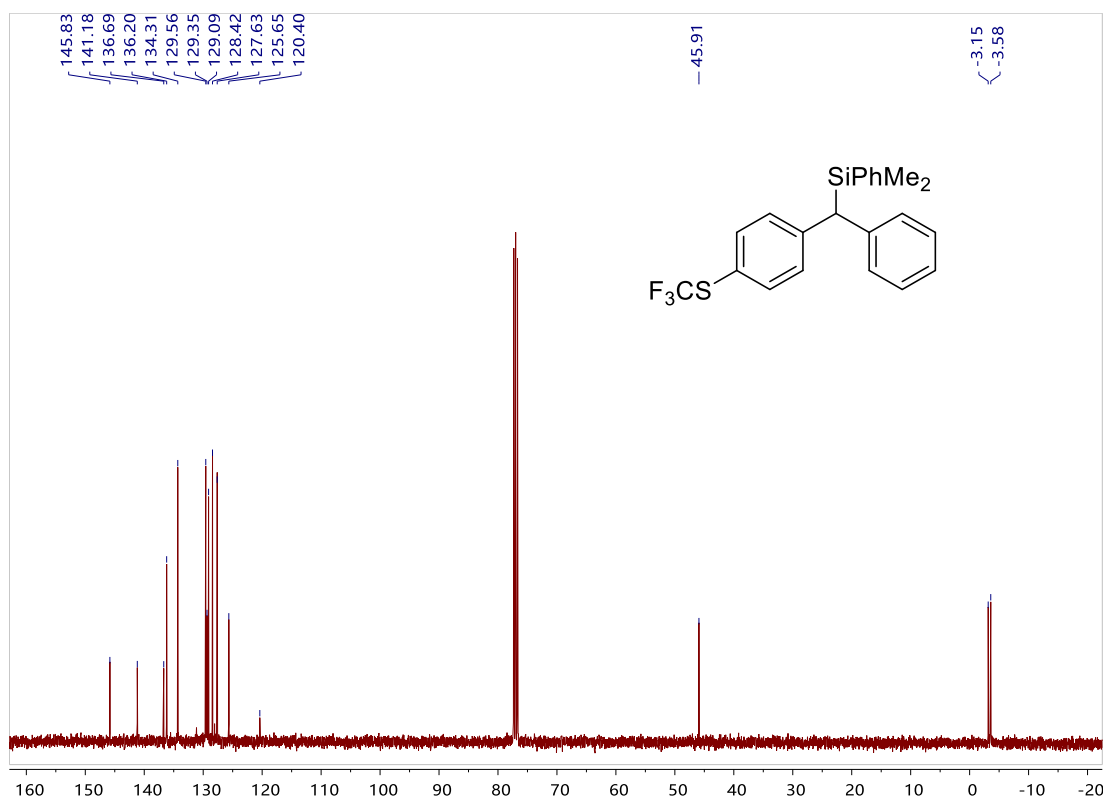

**(-)-dimethyl(phenyl)(phenyl(4-(trifluoromethoxy)phenyl)methyl)silane (P5)**

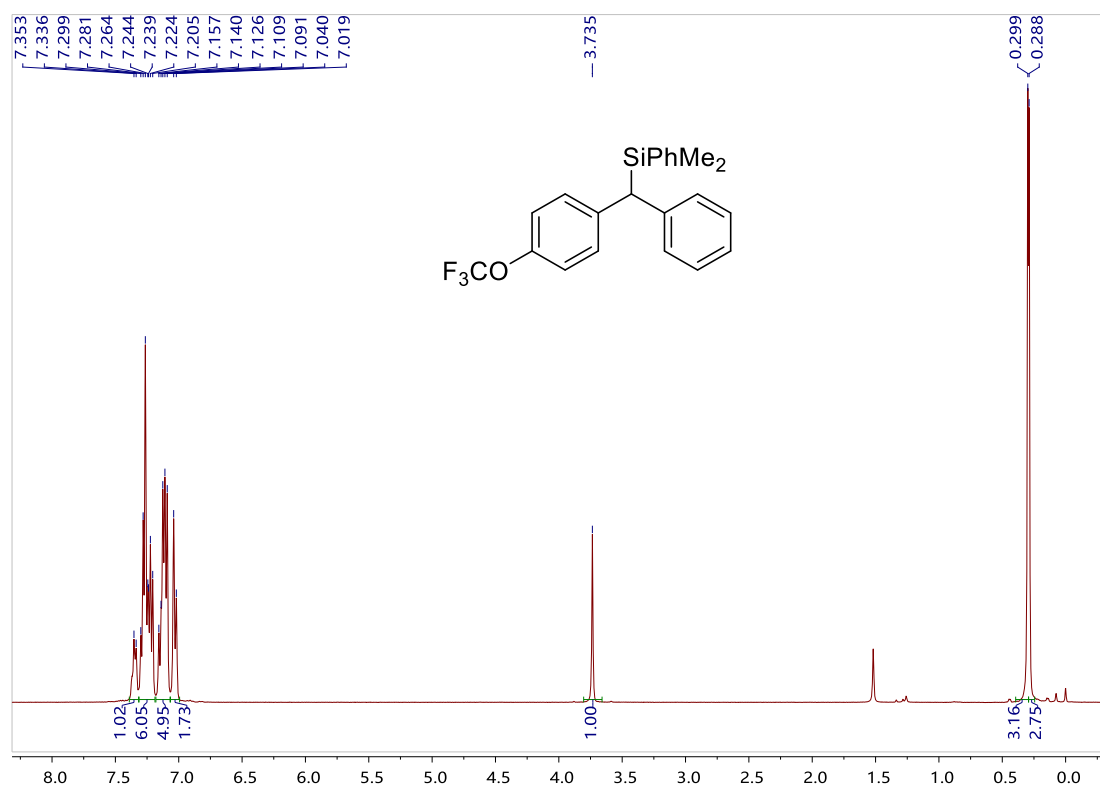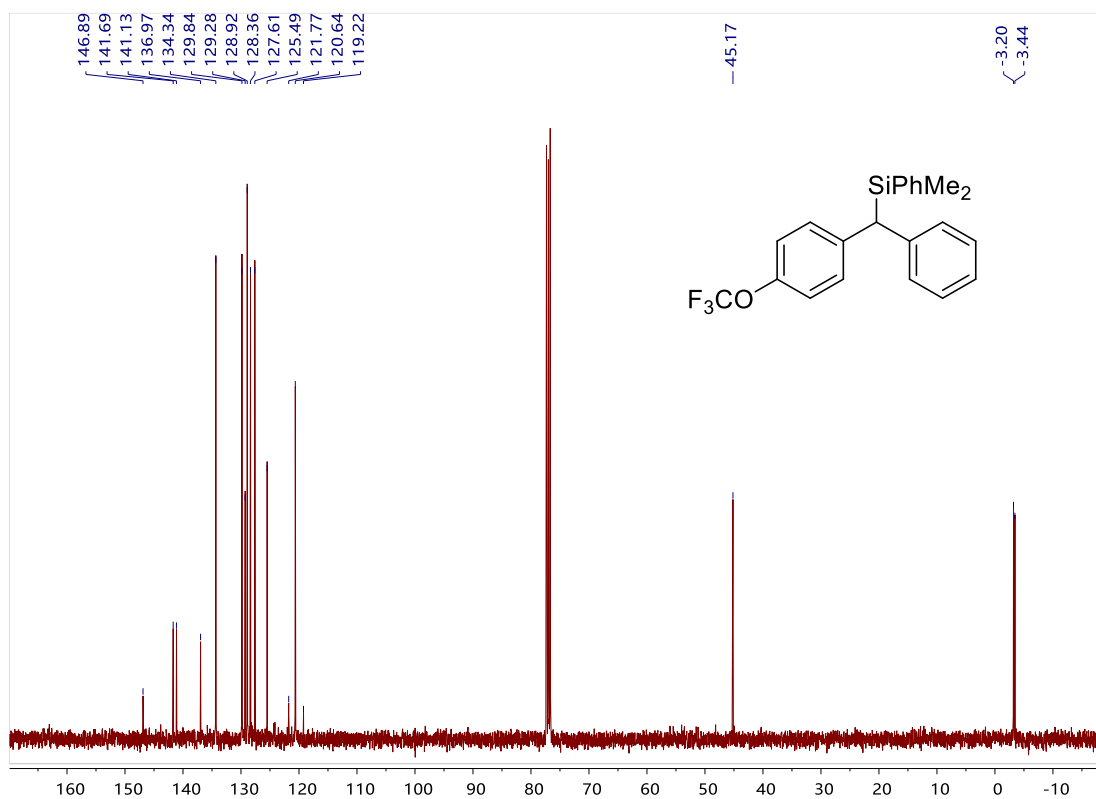

**(+)-((4-chlorophenyl)(phenyl)methyl)dimethyl(phenyl)silane (P6)**

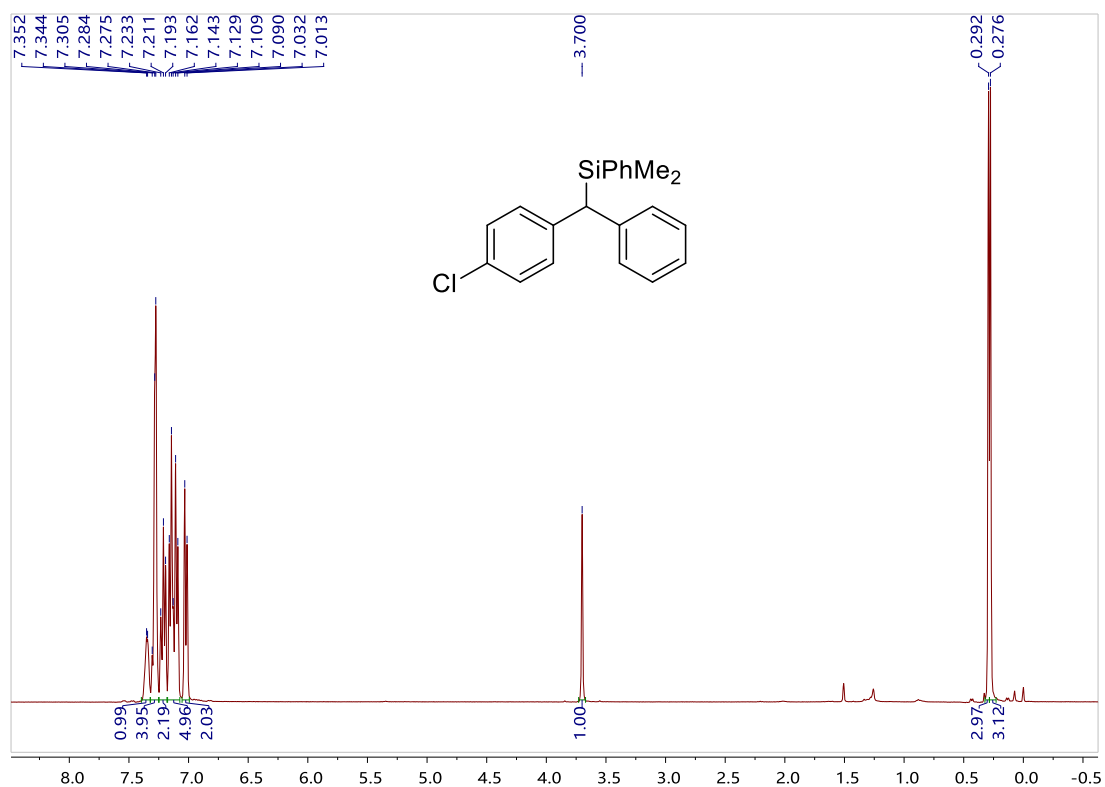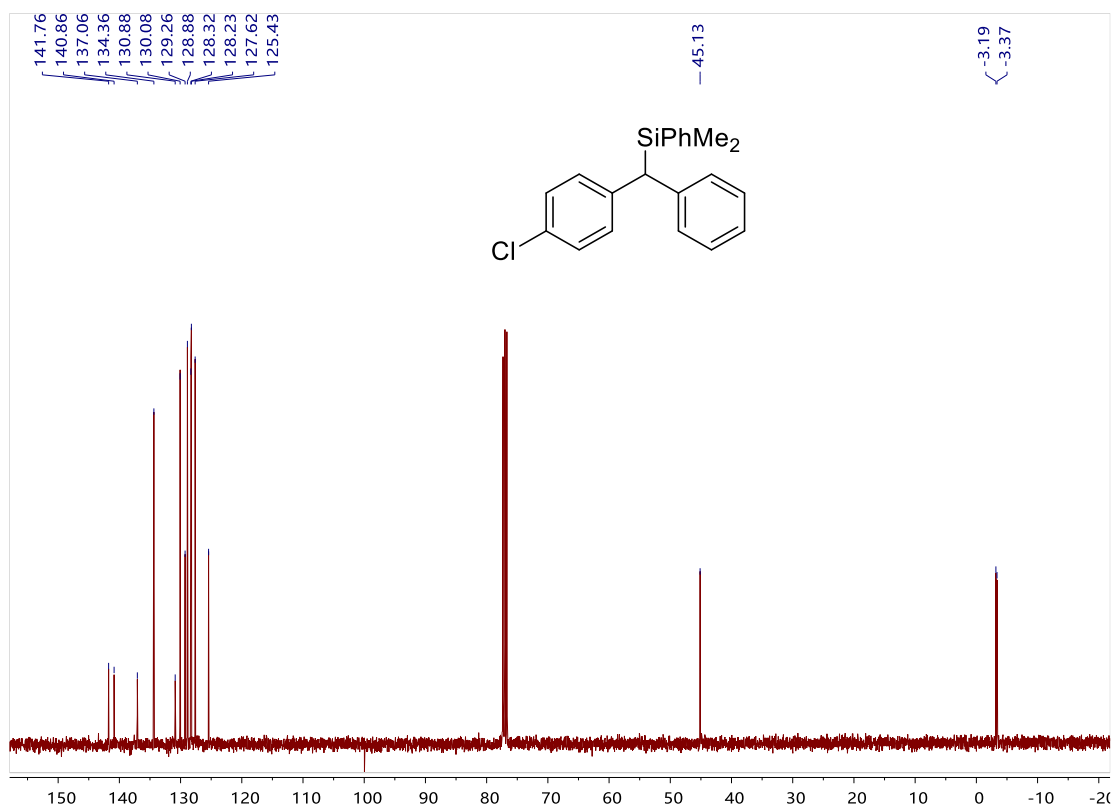

**(+)-((4-bromophenyl)(phenyl)methyl)dimethyl(phenyl)silane (P7)**

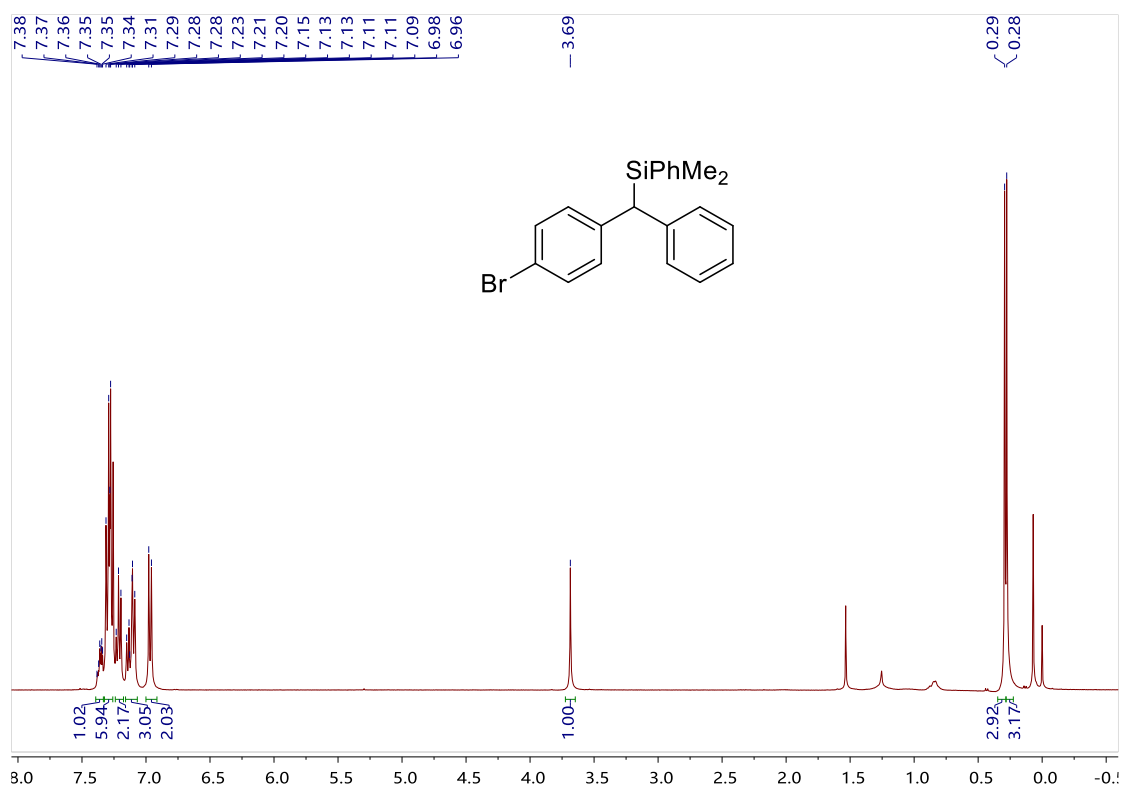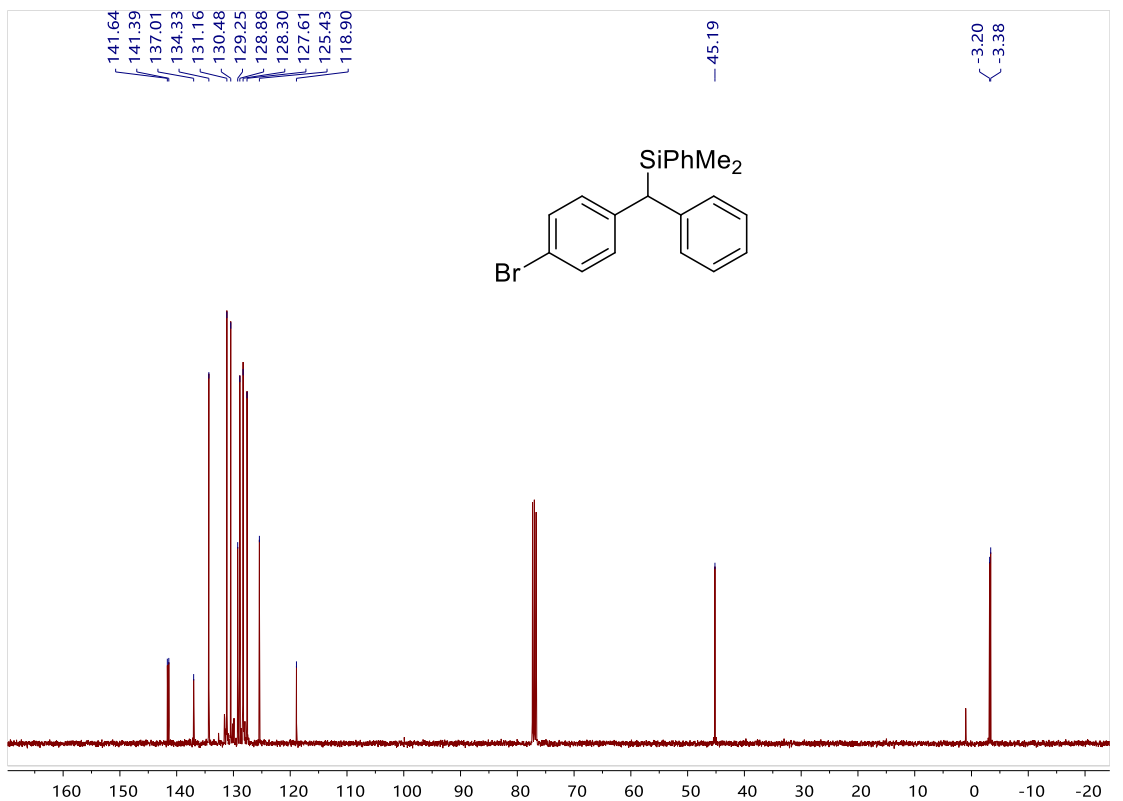

**(+)-((4-iodophenyl)(phenyl)methyl)dimethyl(phenyl)silane (P8)**

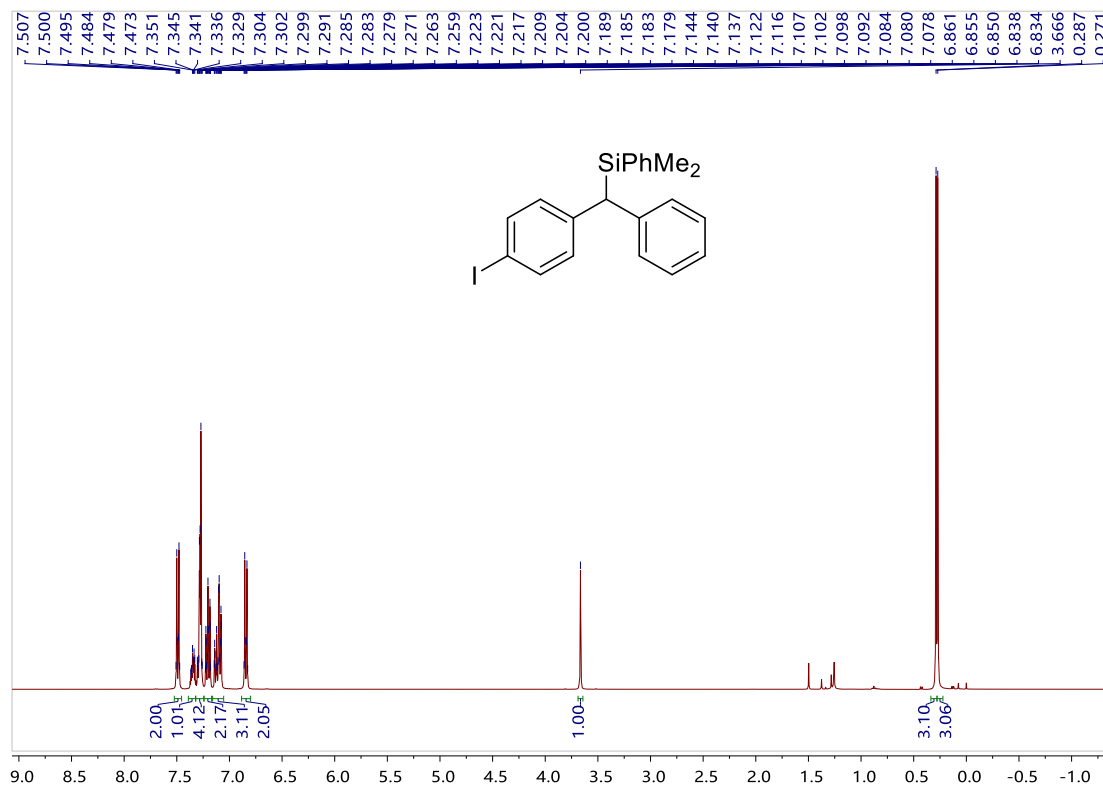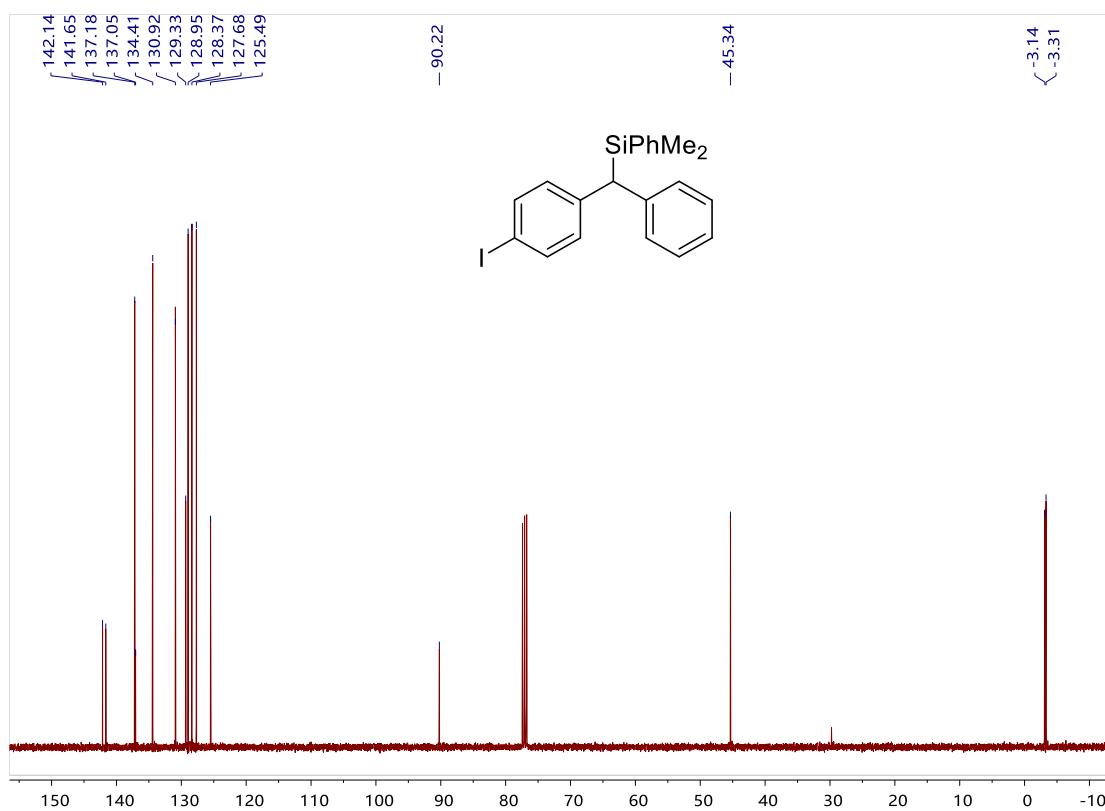



**(+)-((4-fluorophenyl)(phenyl)methyl)dimethyl(phenyl)silane (P9)**

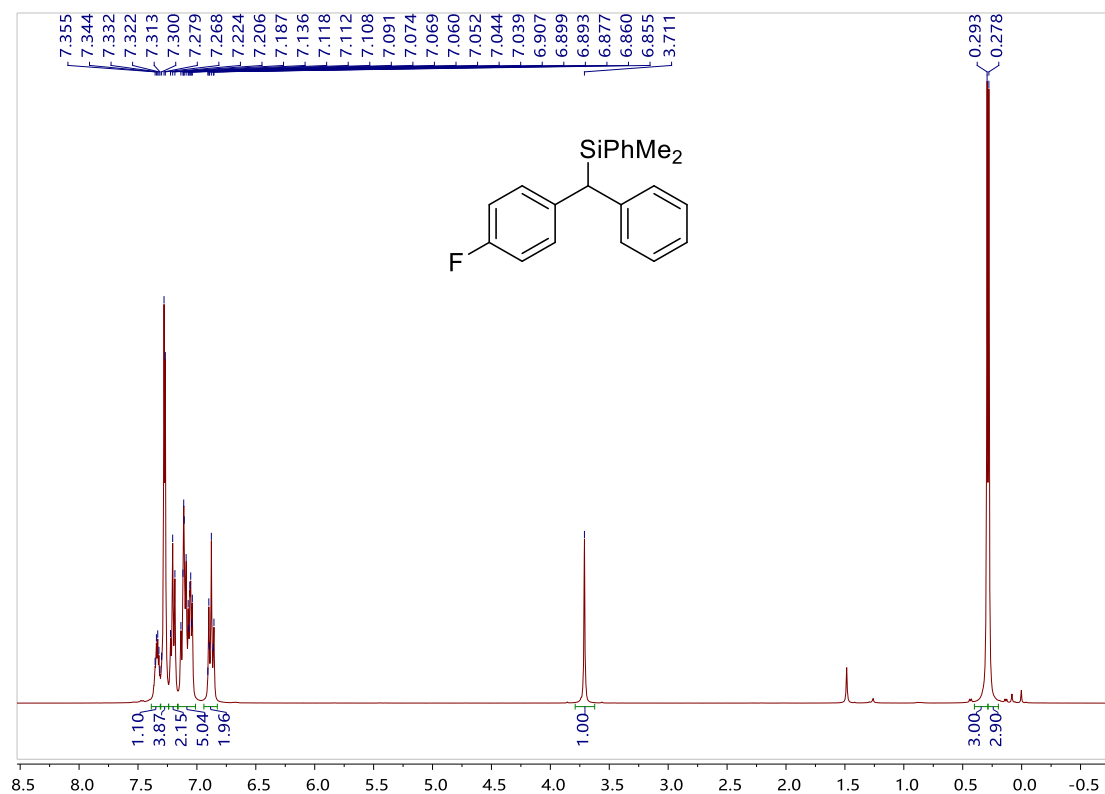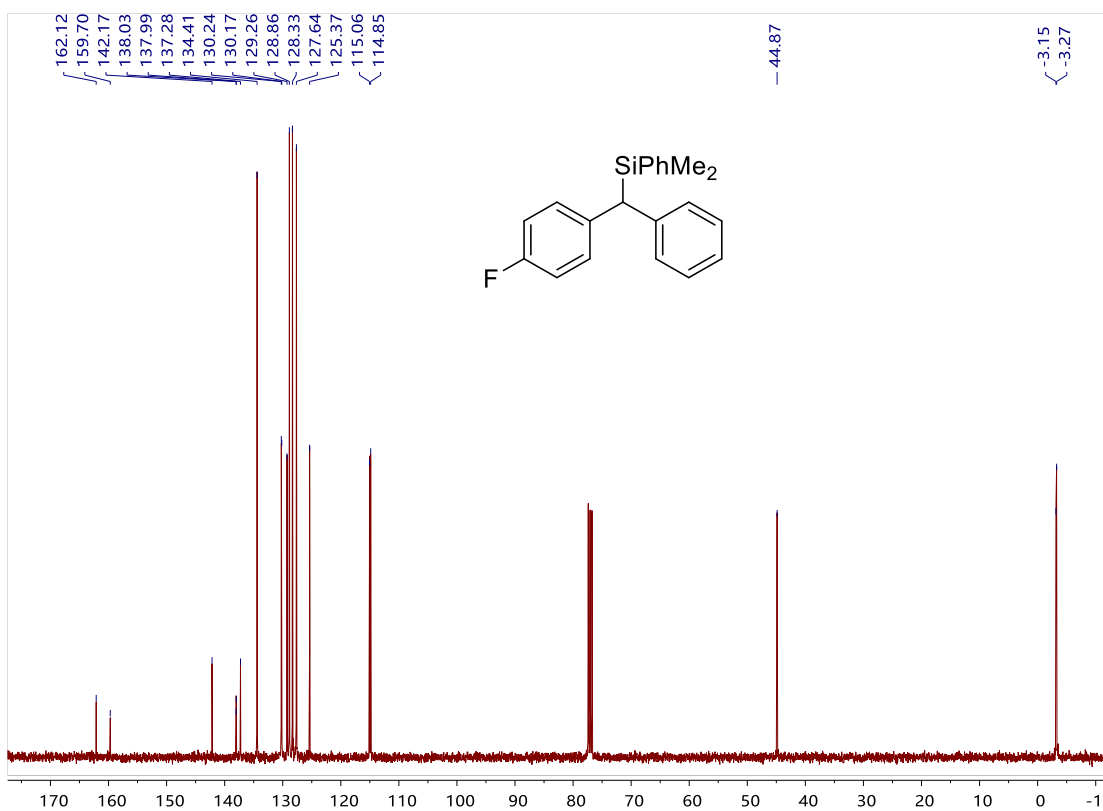

**(-)-dimethyl(phenyl)(phenyl(p-tolyl)methyl)silane (P10)**

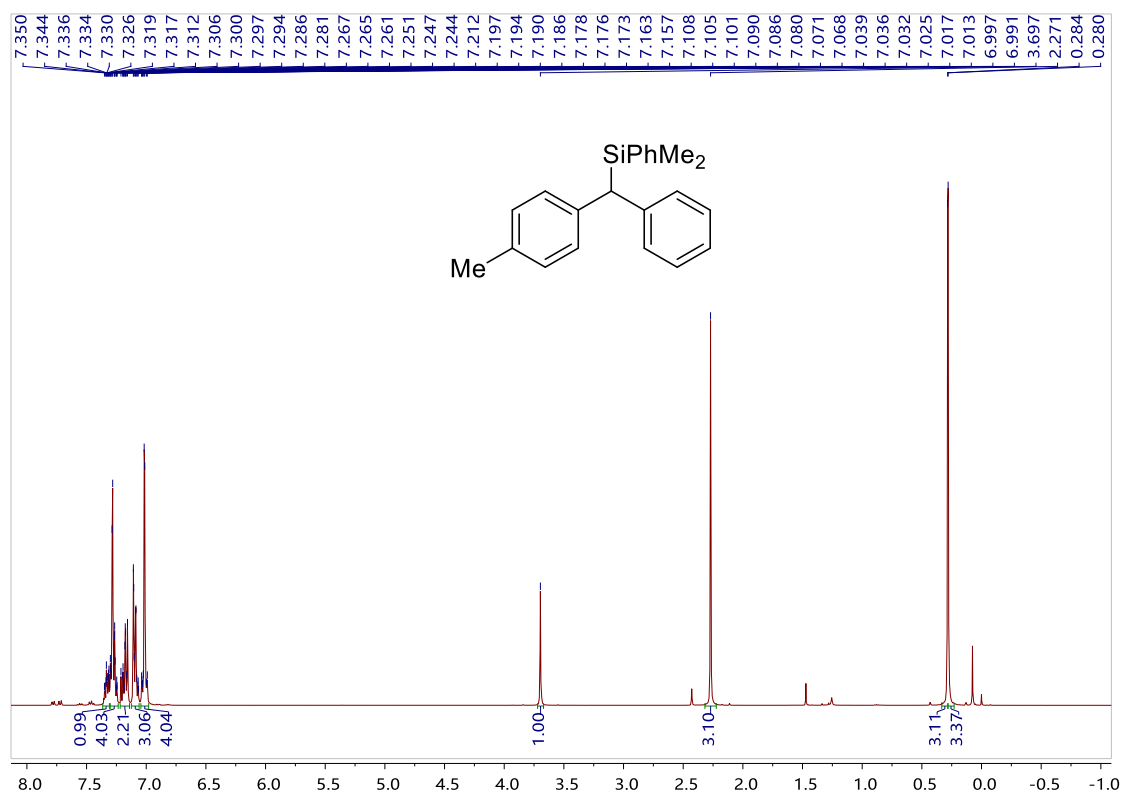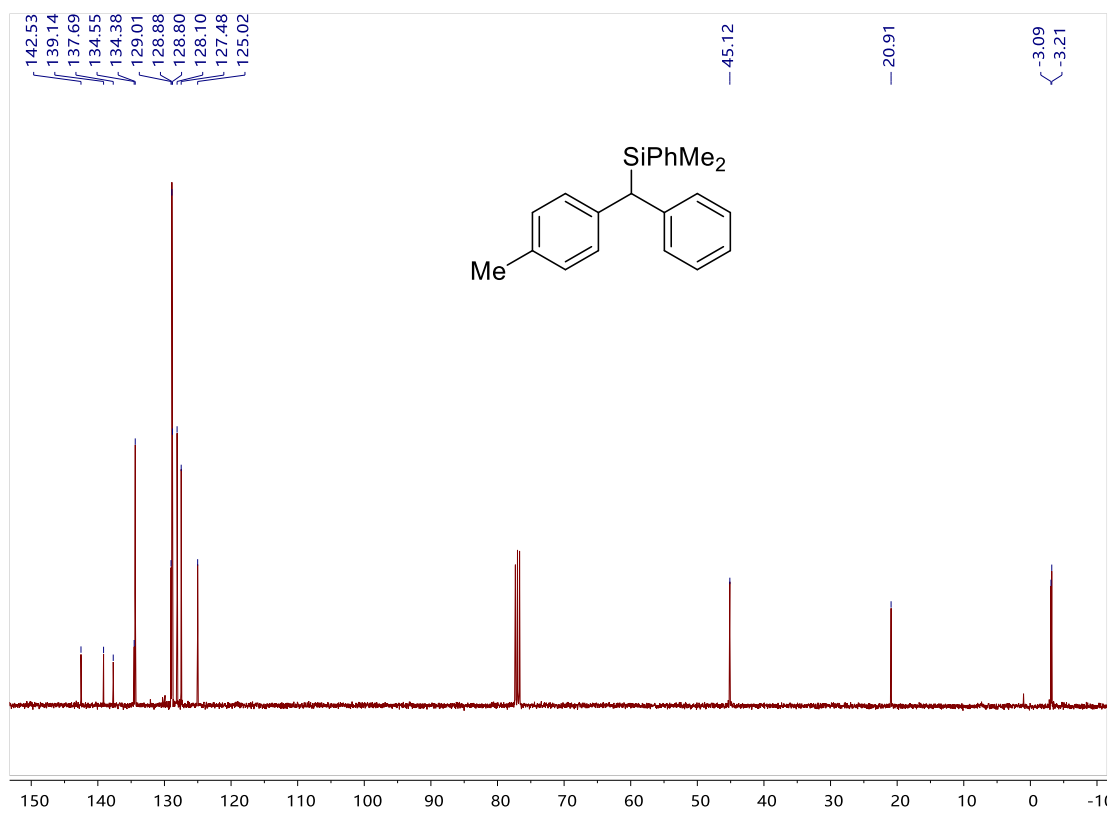

**(R)-((4-methoxyphenyl)(phenyl)methyl)dimethyl(phenyl)silane (P11)**

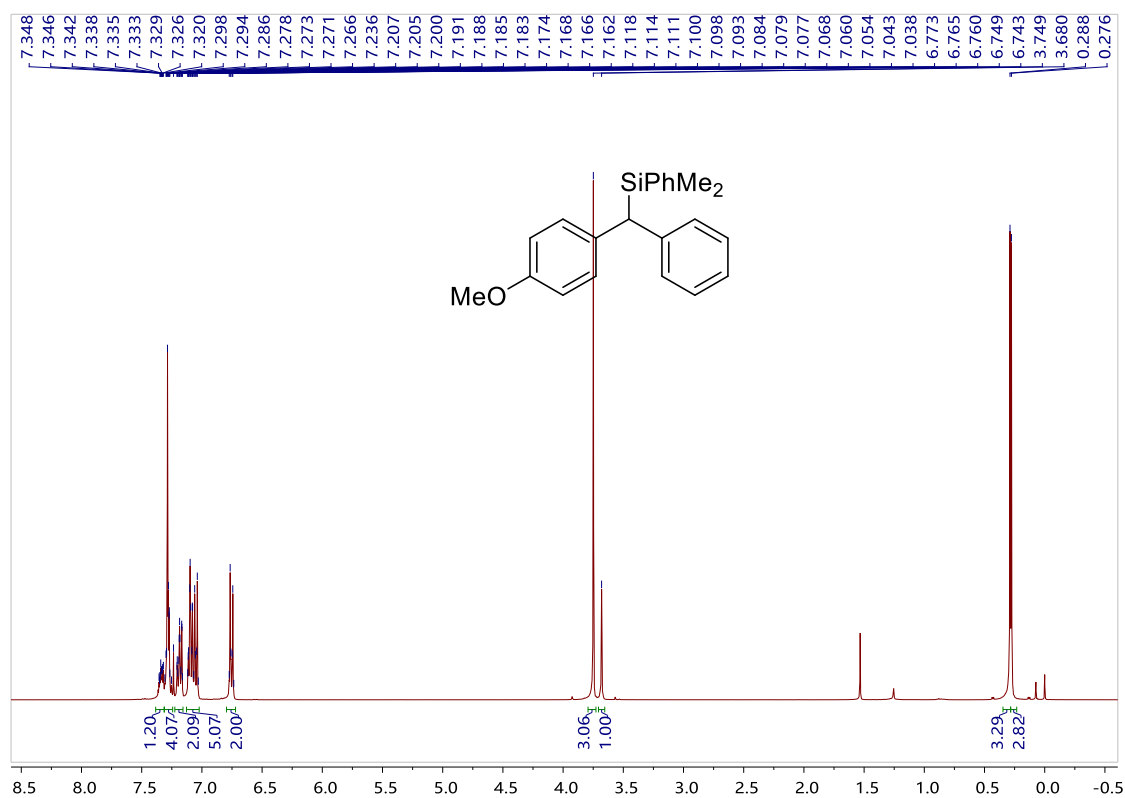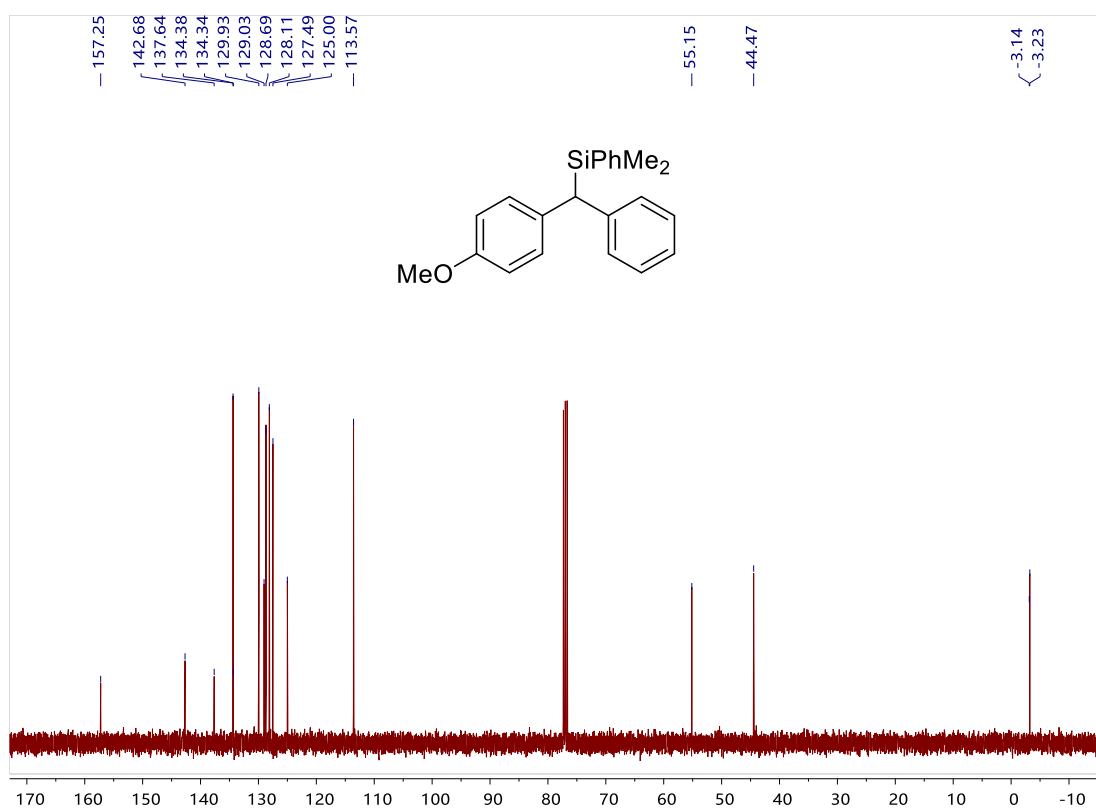

**(-)-4-((dimethyl(phenyl)silyl)(phenyl)methyl)-*N,N*-dimethylaniline (P12)**

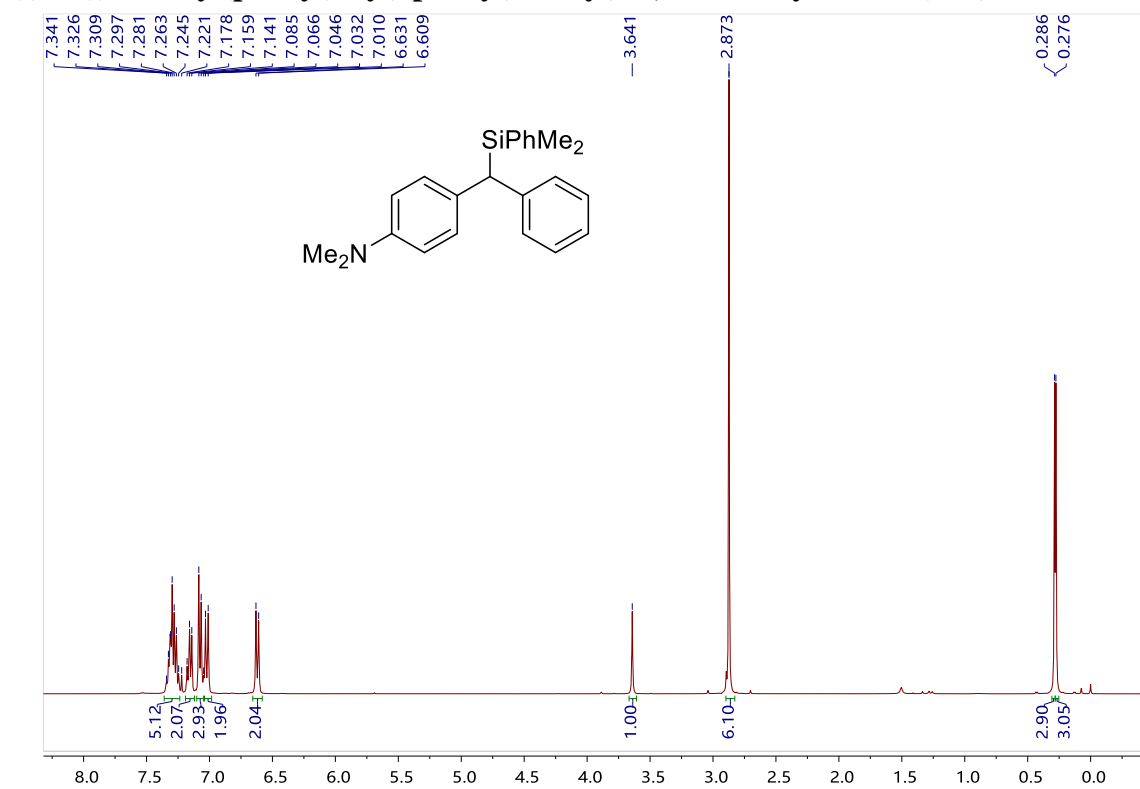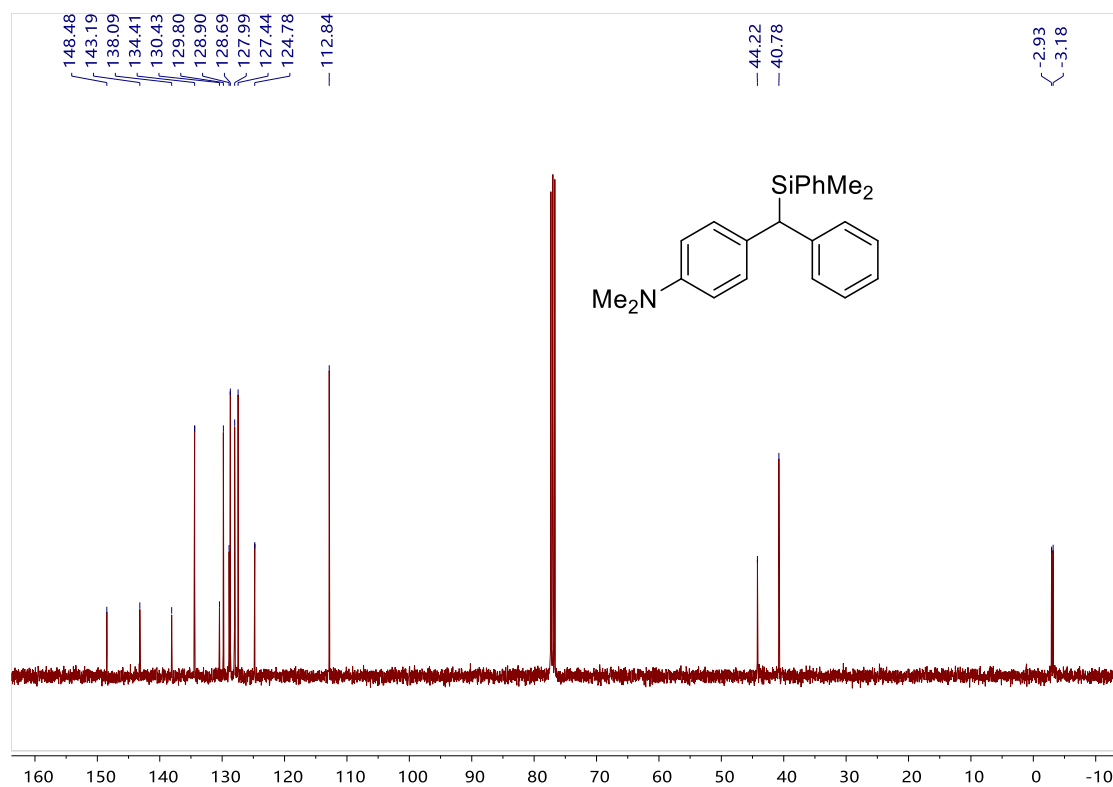

**(-)-4-((dimethyl(phenyl)silyl)(4-nitrophenyl)methyl)-*N,N*-dimethylaniline (P13)**

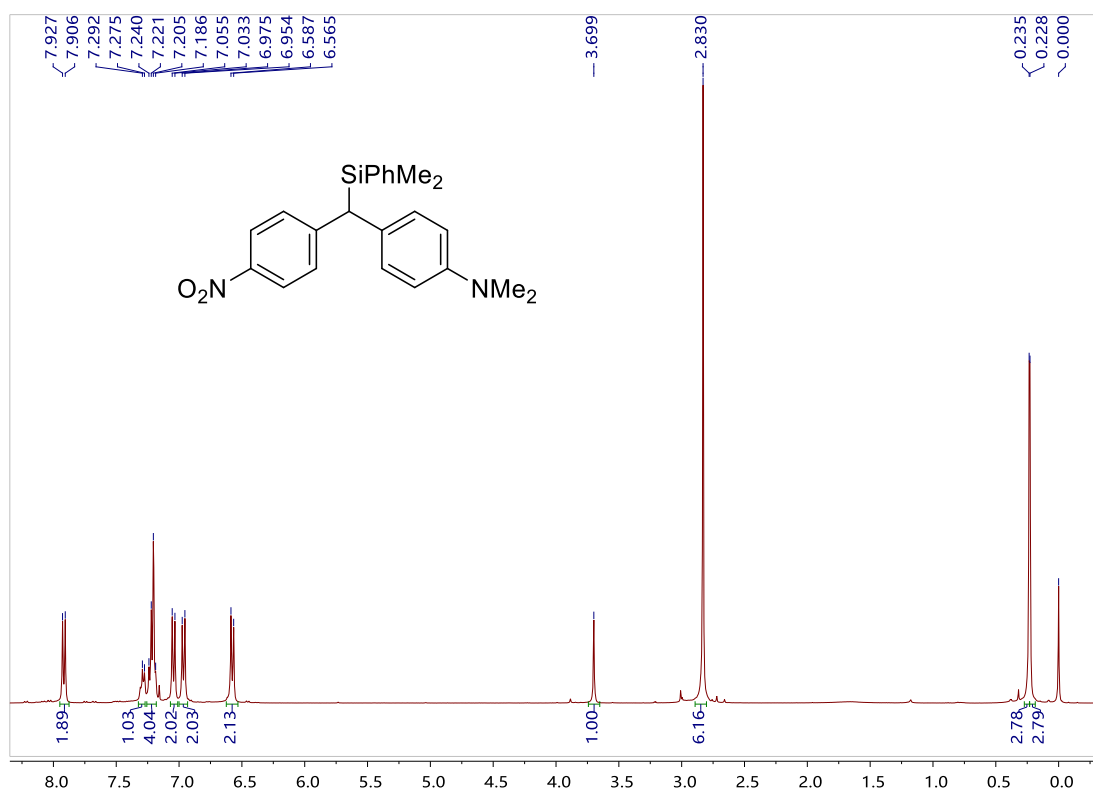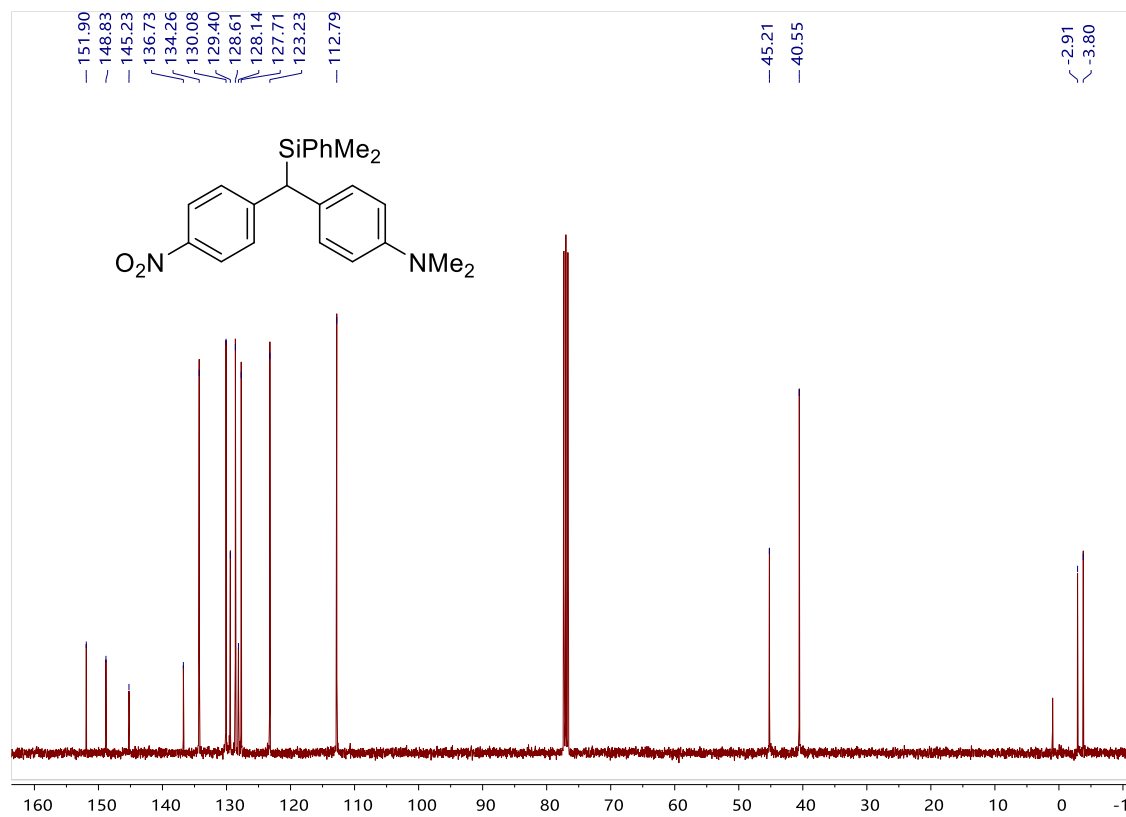

**(-)-((4-methoxyphenyl)(4-nitrophenyl)methyl)dimethyl(phenyl)silane (P14)**

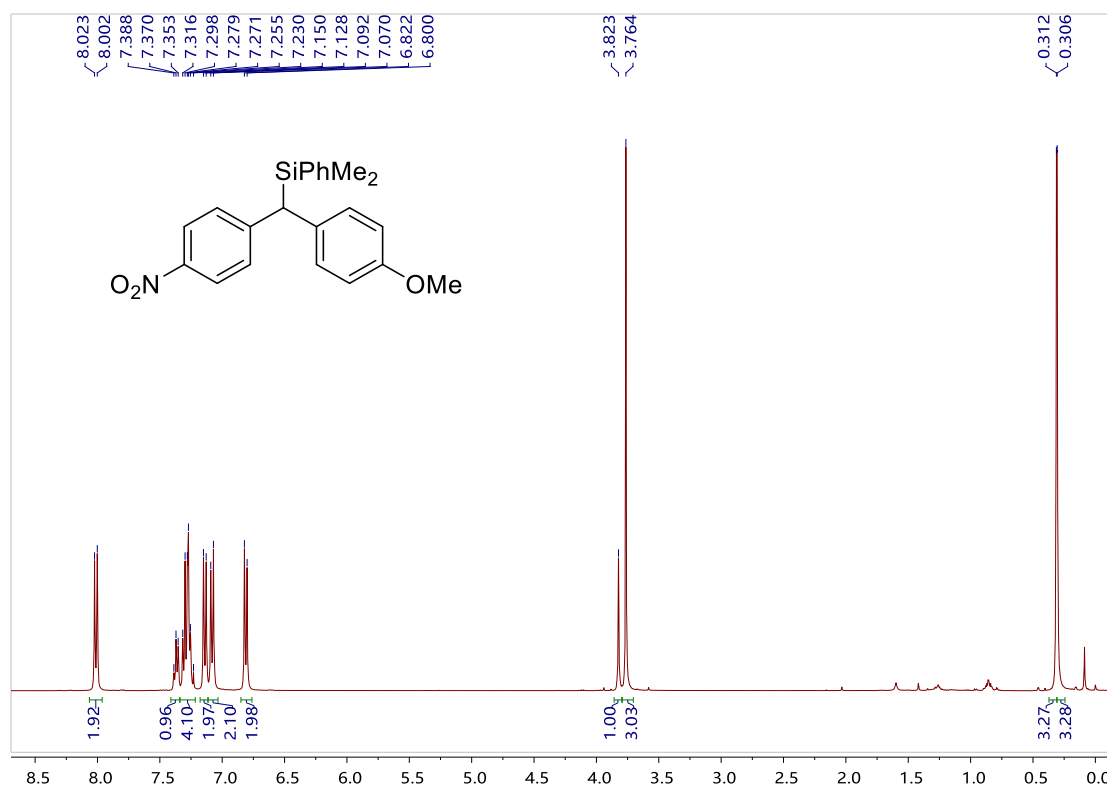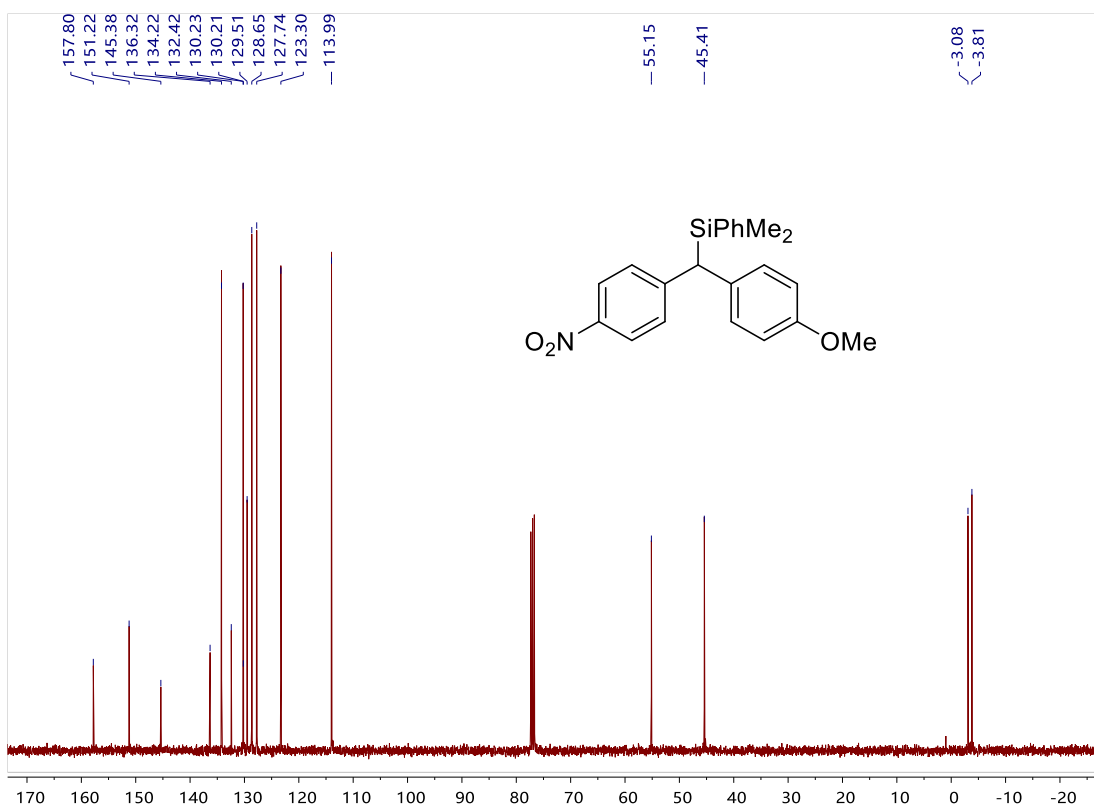

**(-)-dimethyl((4-nitrophenyl)(p-tolyl)methyl)(phenyl)silane (P15)**

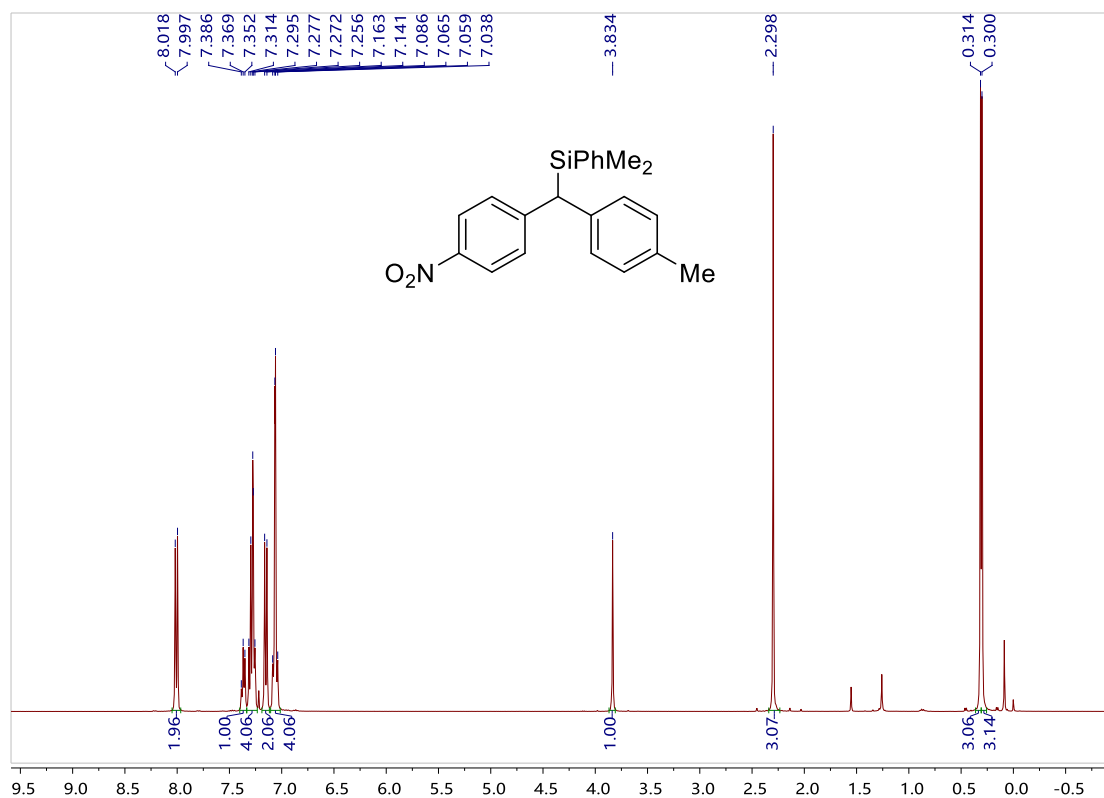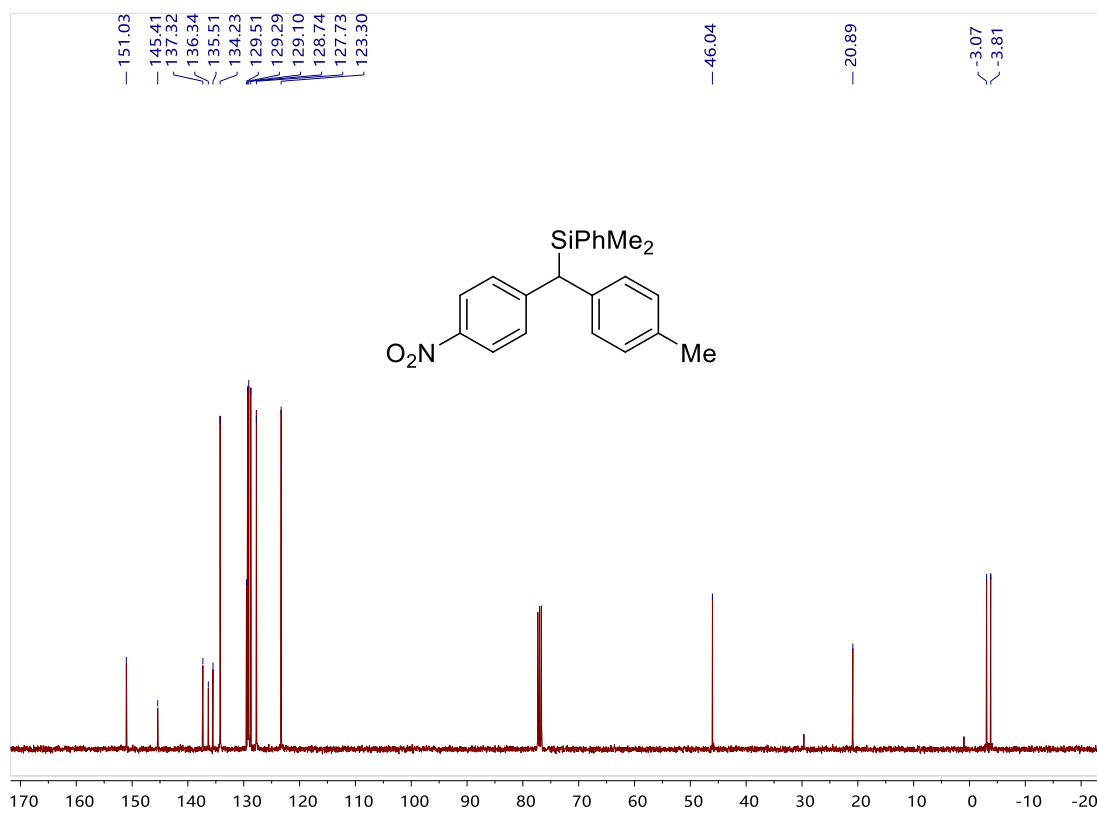

**(-)-((4-fluorophenyl)(4-nitrophenyl)methyl)dimethyl(phenyl)silane (P16)**

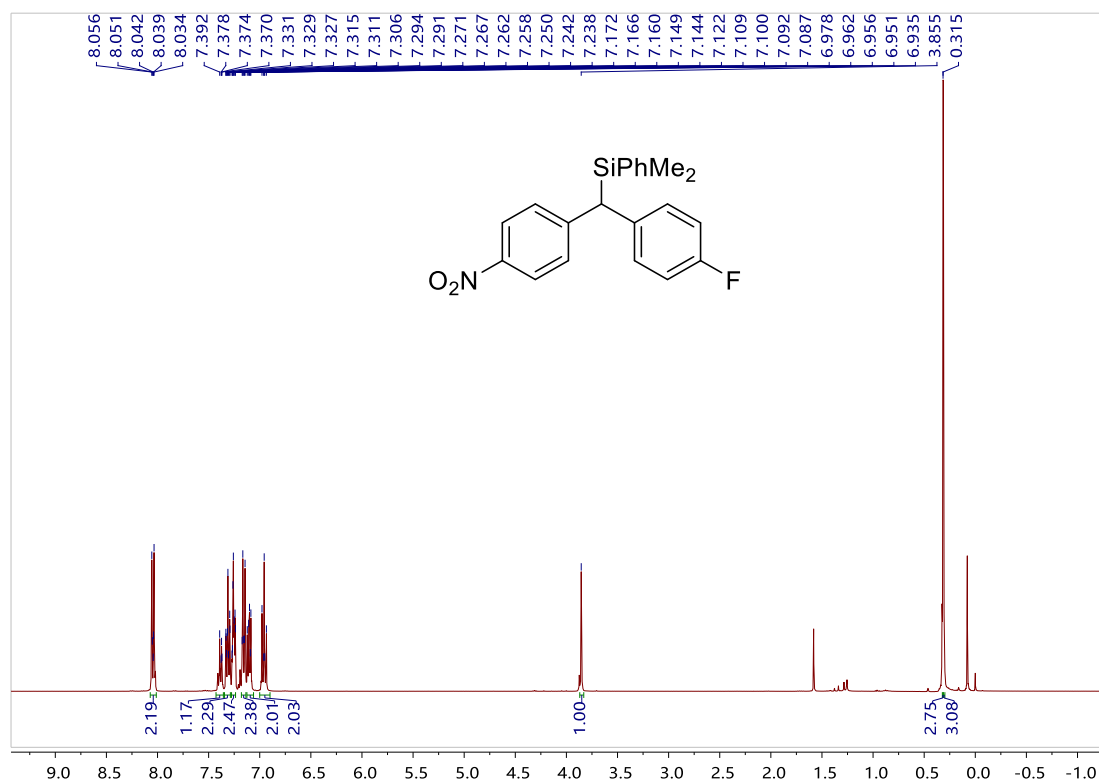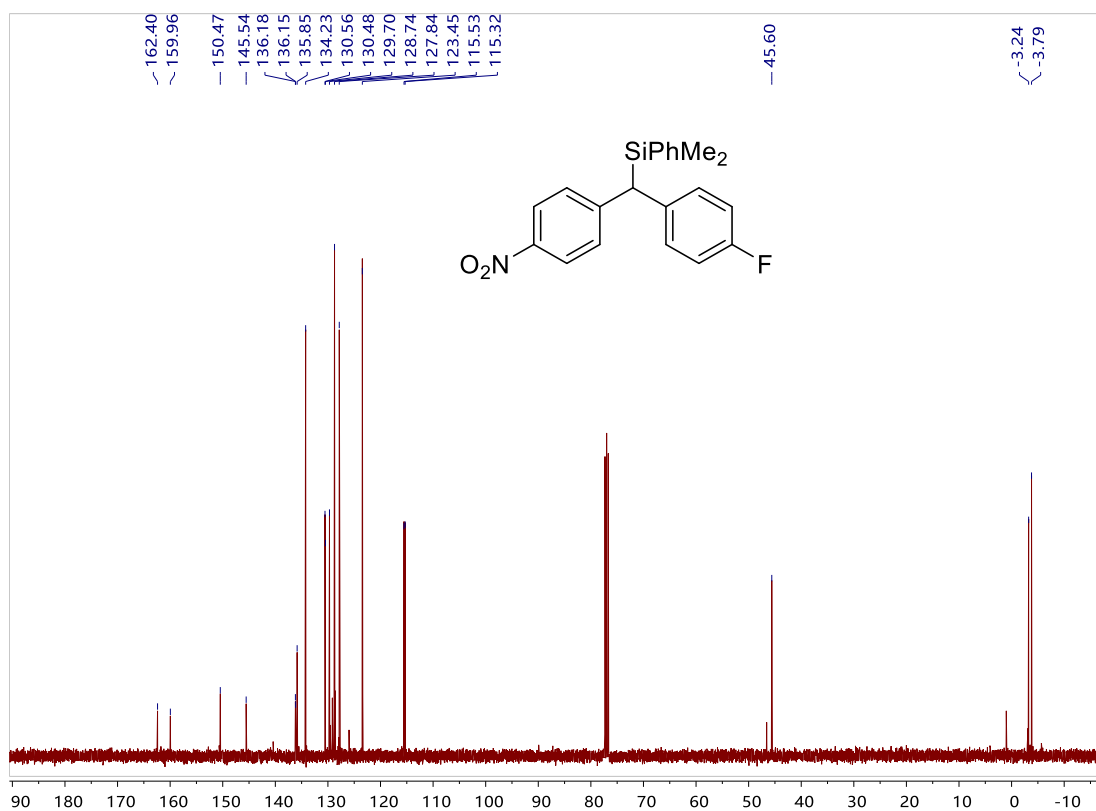



**(-)-((4-bromophenyl)(4-nitrophenyl)methyl)dimethyl(phenyl)silane (P17)**

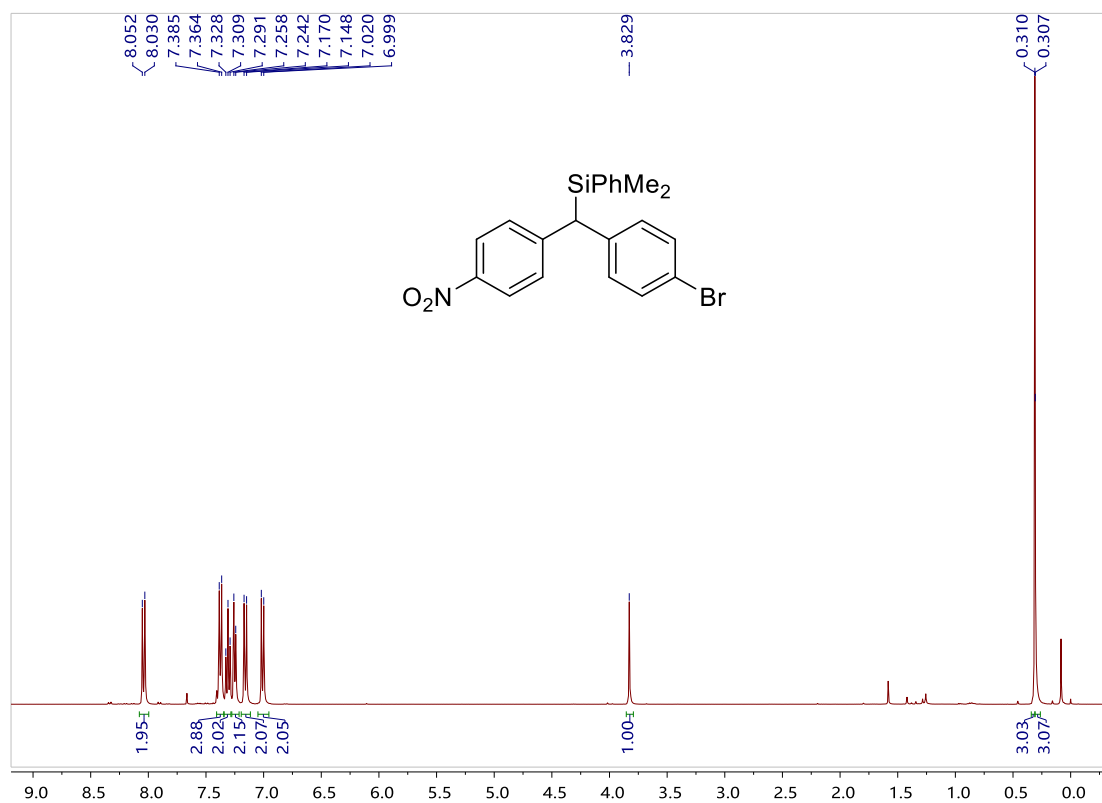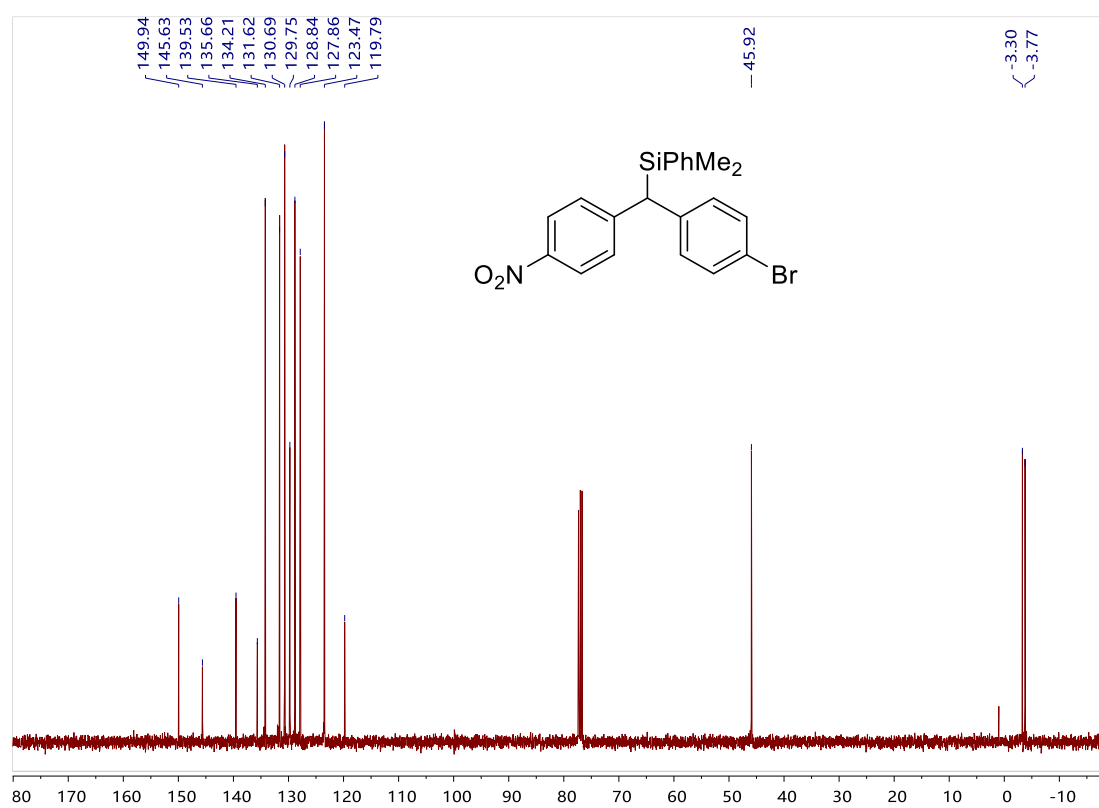

**(-)-((4-chlorophenyl)(4-nitrophenyl)methyl)dimethyl(phenyl)silane (P18)**

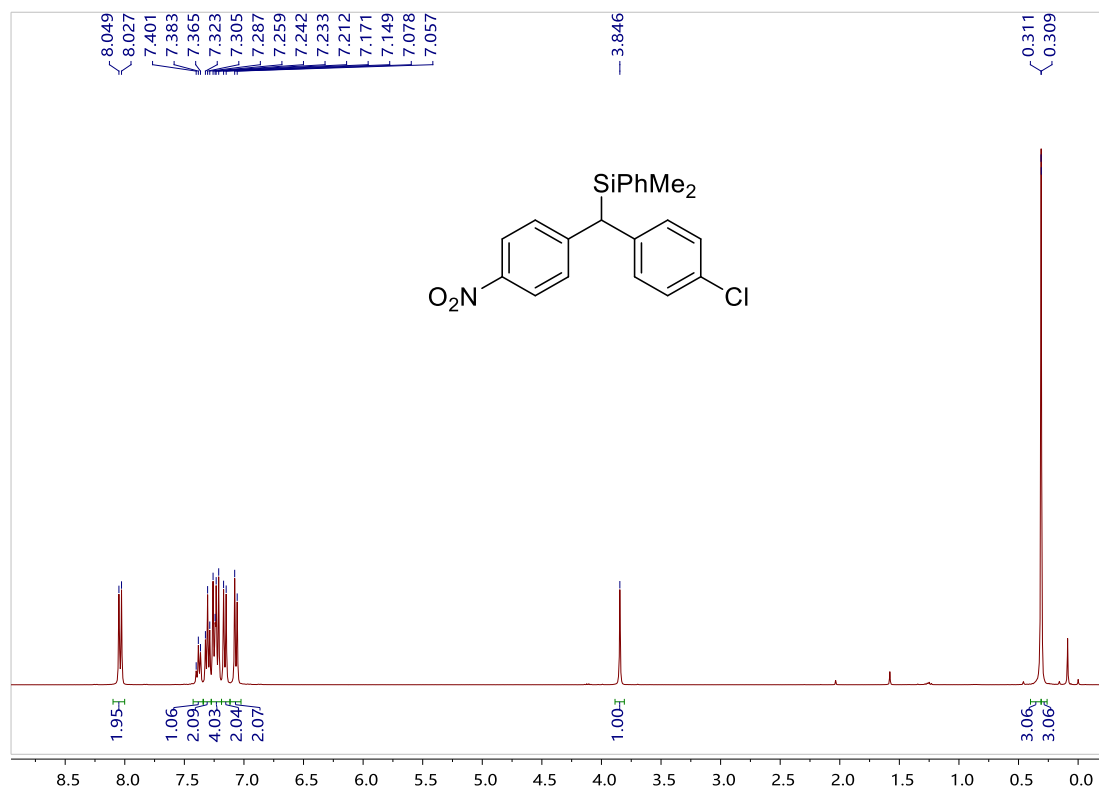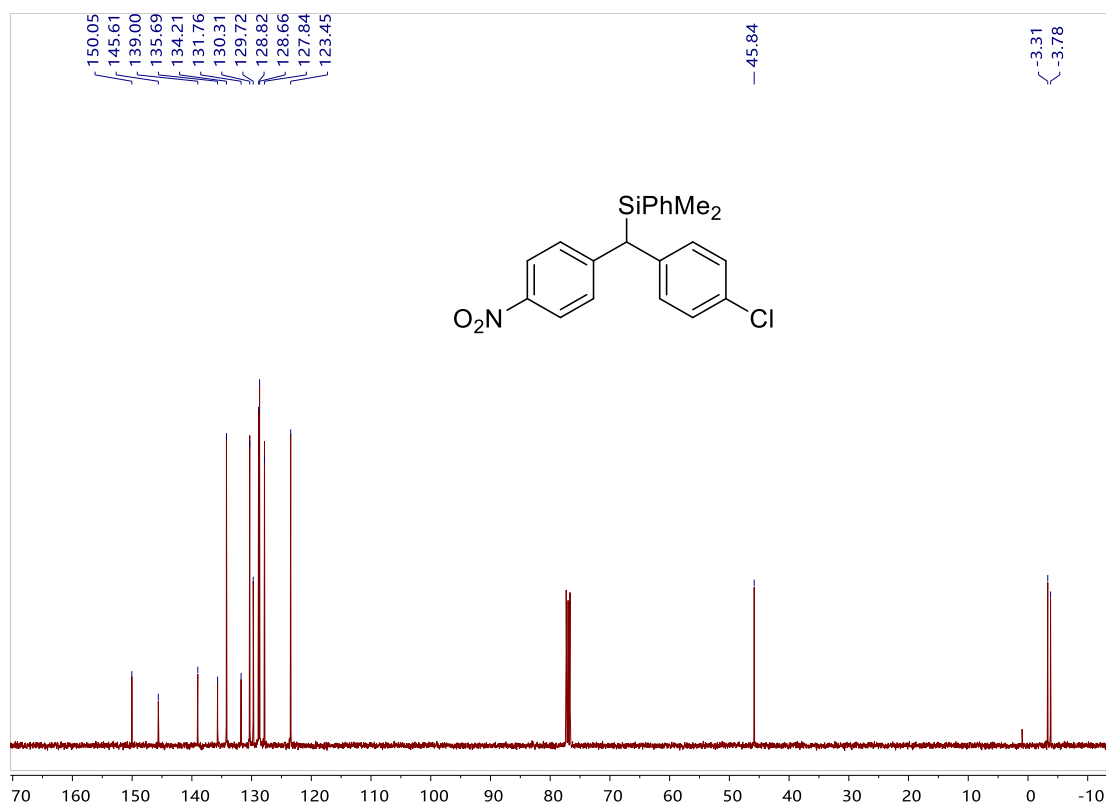

**(-)-dimethyl((4-nitrophenyl)(4-(trifluoromethyl)phenyl)methyl)(phenyl)silane (P19)**

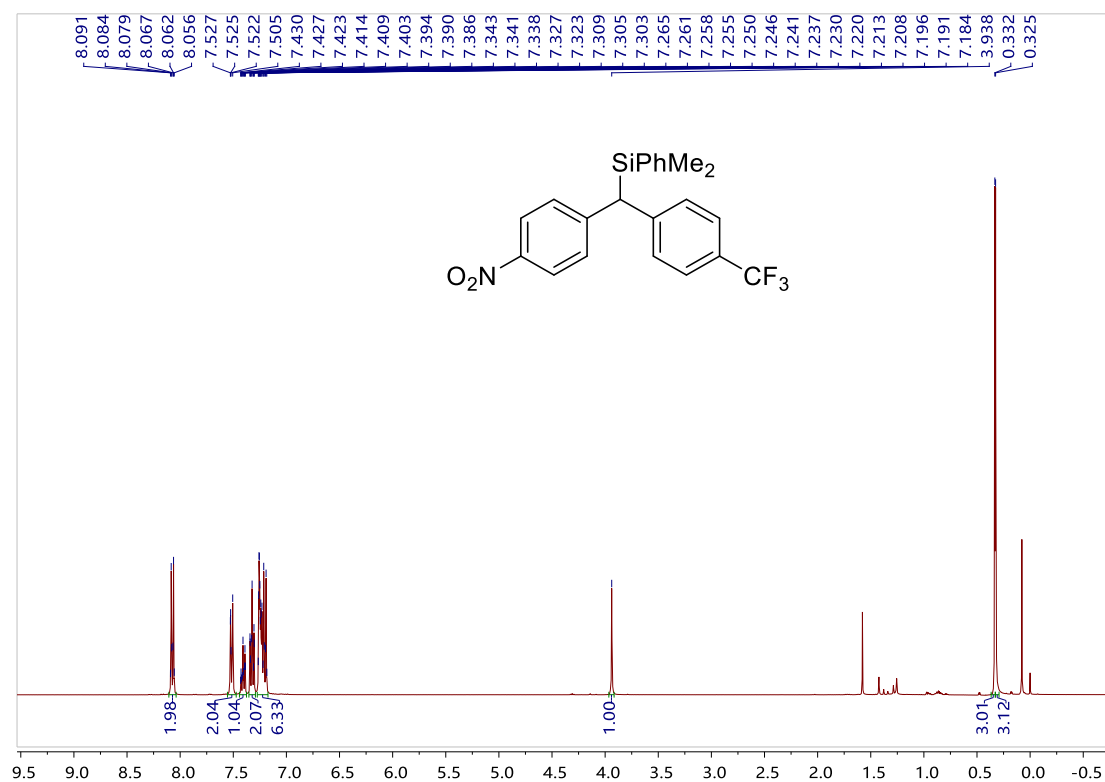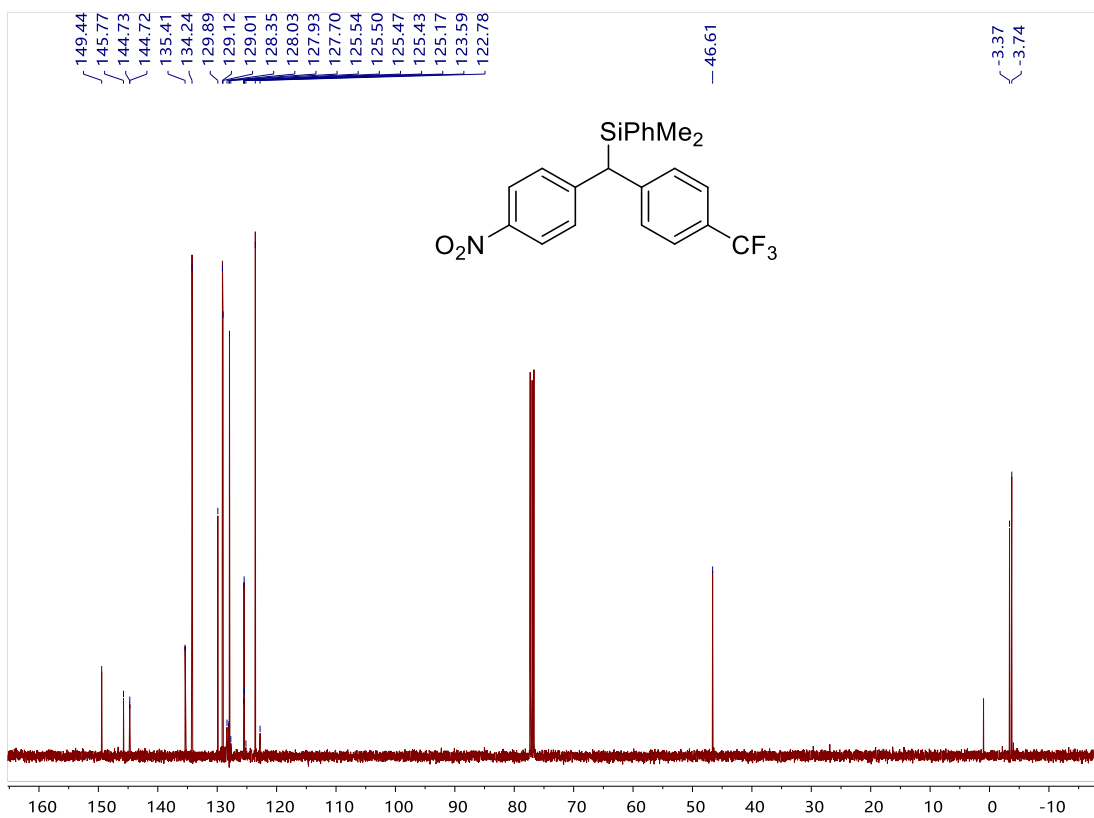

**(-)-4-((dimethyl(phenyl)silyl)(4-(trifluoromethyl)phenyl)methyl)benzonitrile (P20)**

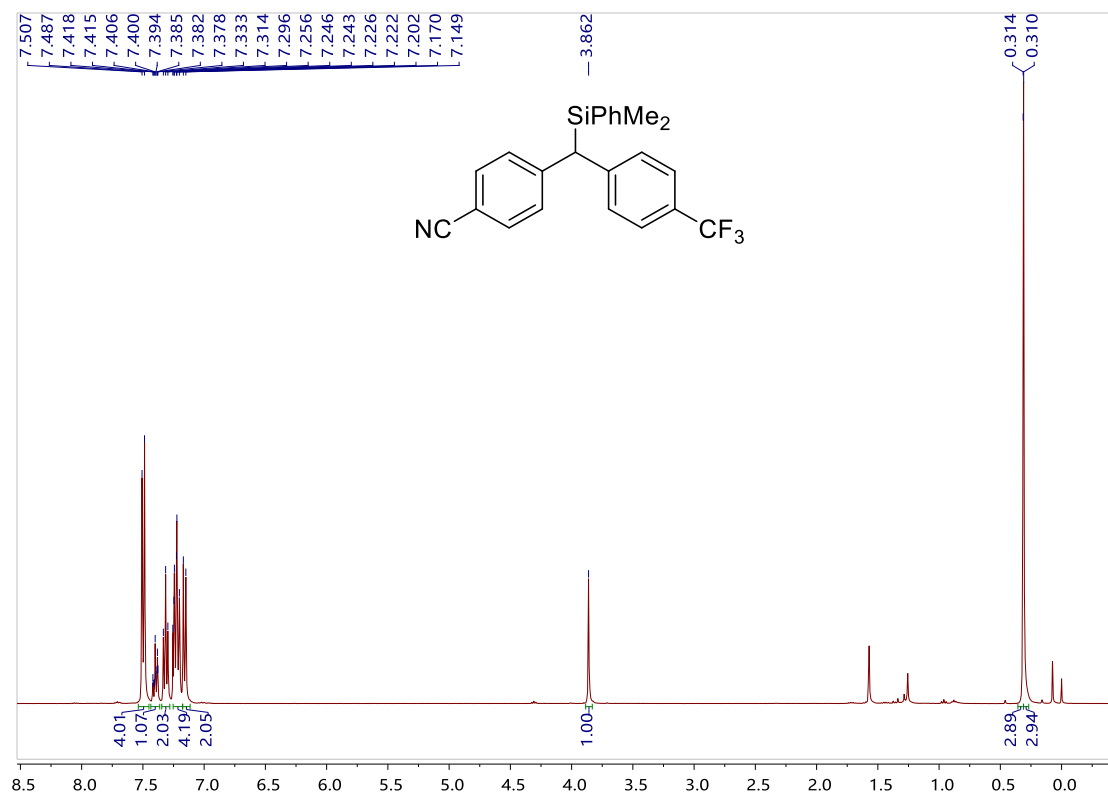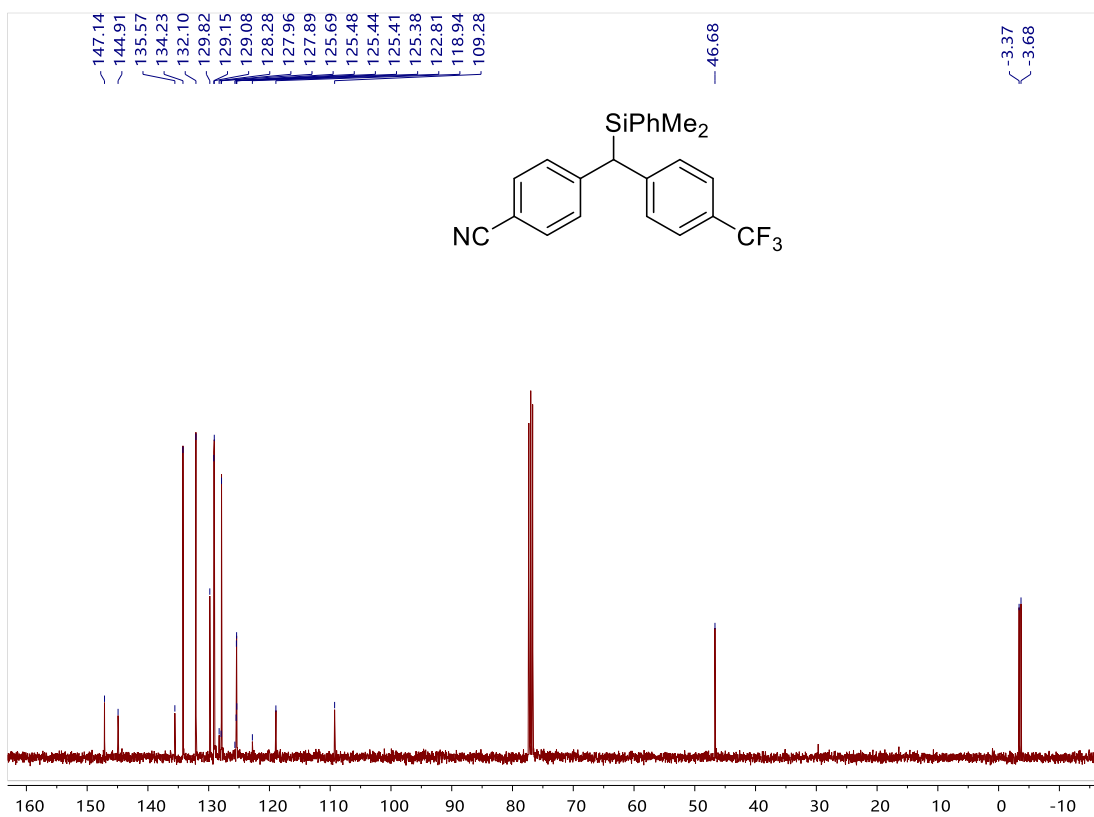

**(-)-((4-methoxyphenyl)(4-(trifluoromethyl)phenyl)methyl)dimethyl(phenyl)silane (P21)**

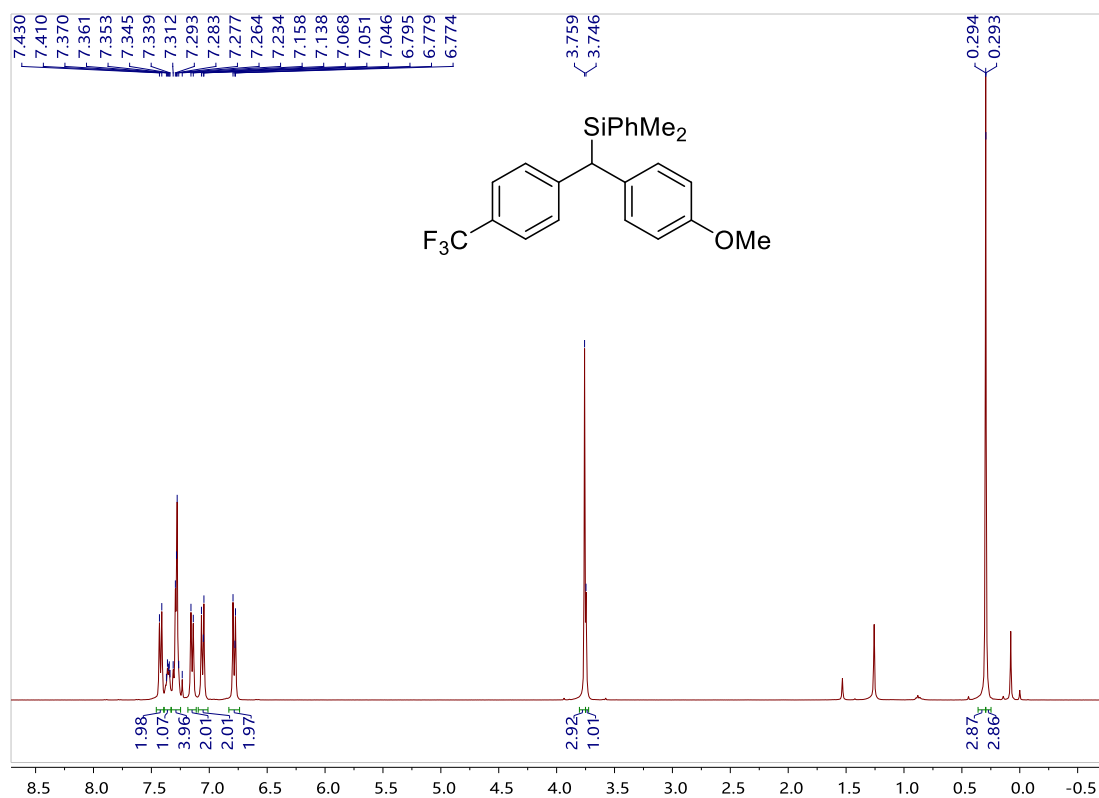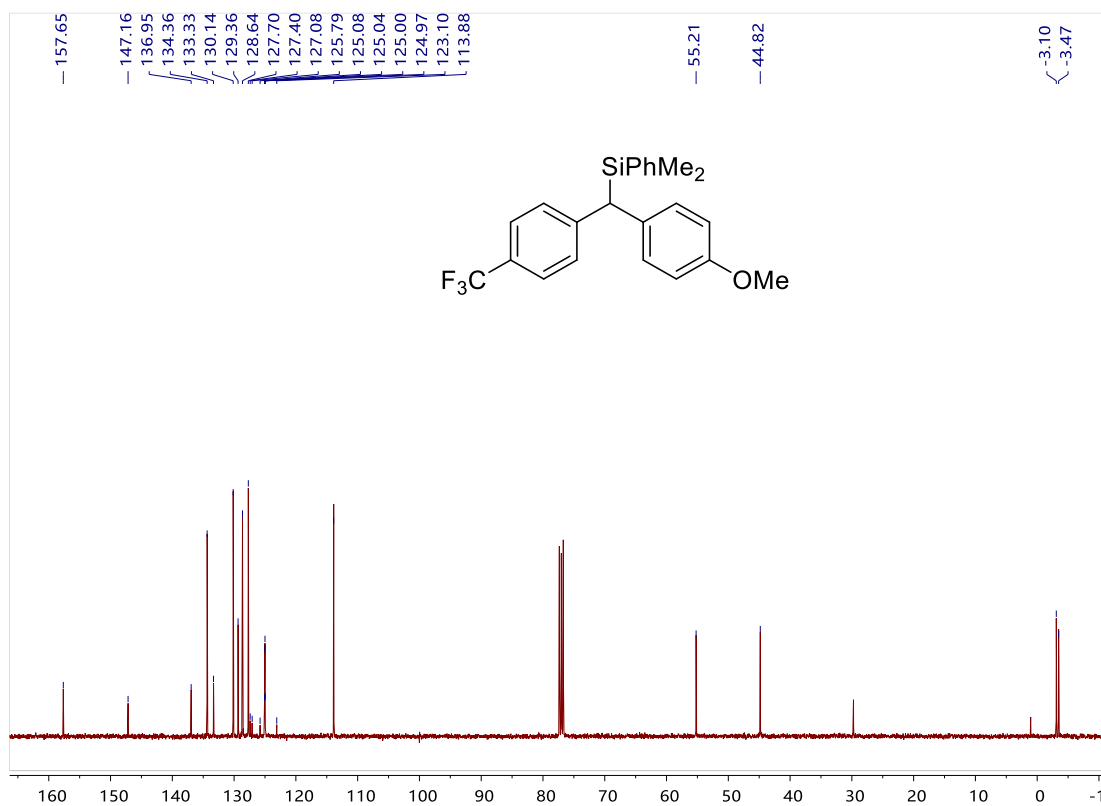

**(S)-dimethyl(phenyl)(p-tolyl(4-(trifluoromethyl)phenyl)methyl)silane (P22)**

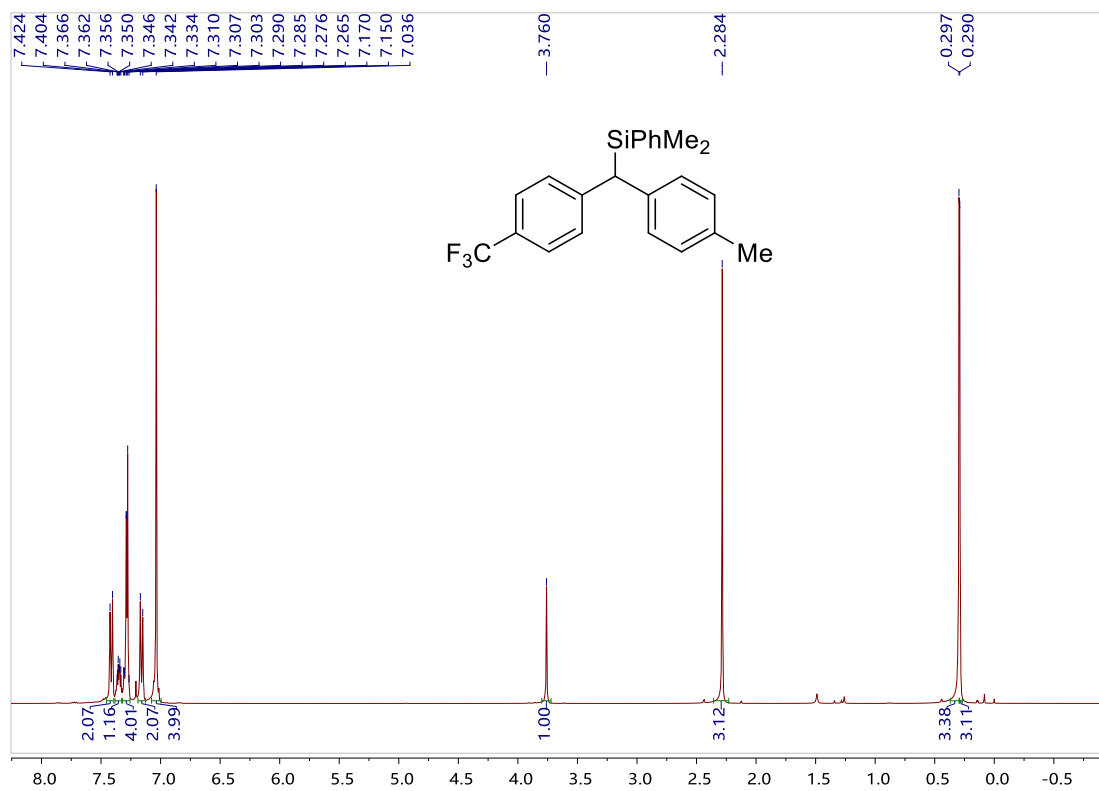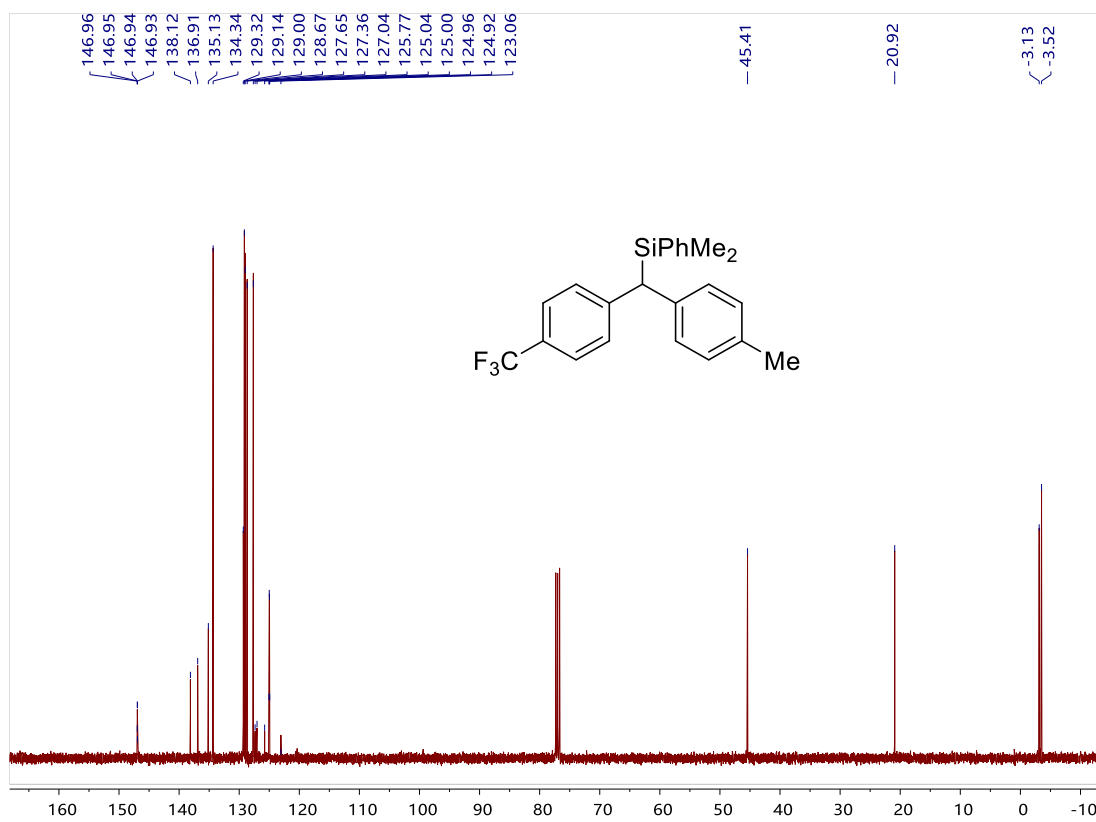

**(-)-((4-fluorophenyl)(4-(trifluoromethyl)phenyl)methyl)dimethyl(phenyl)silane (P23)**

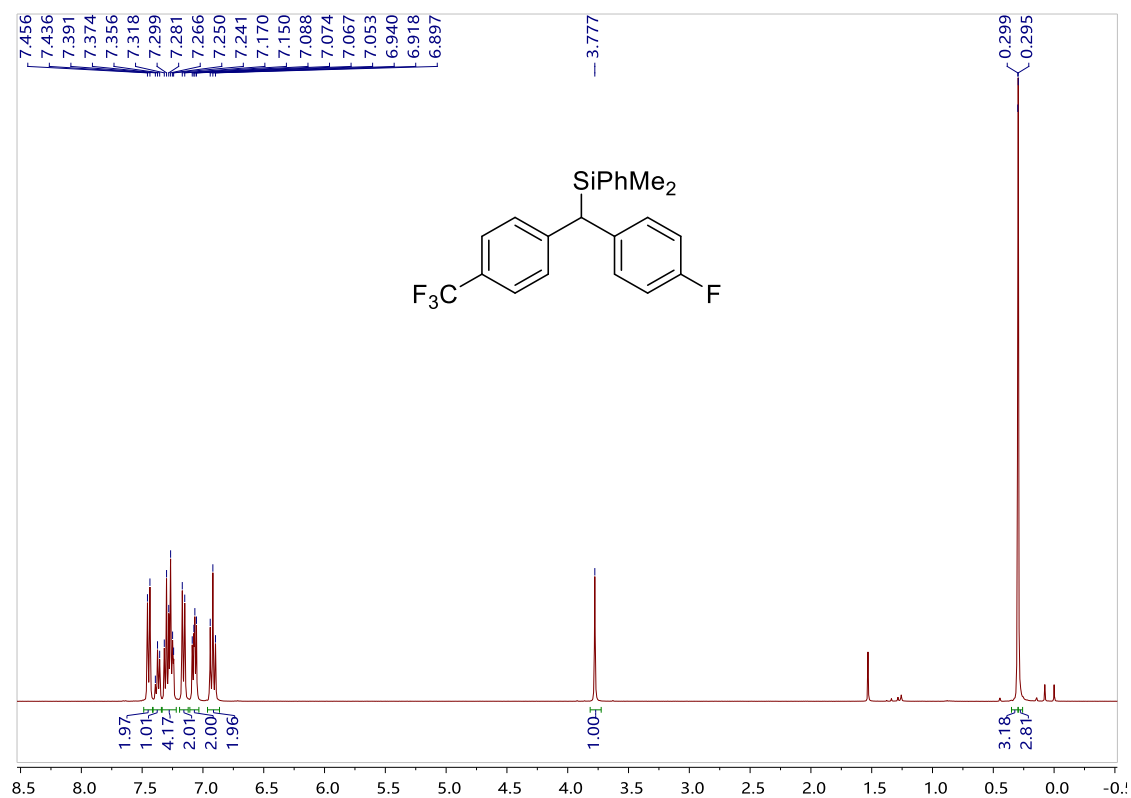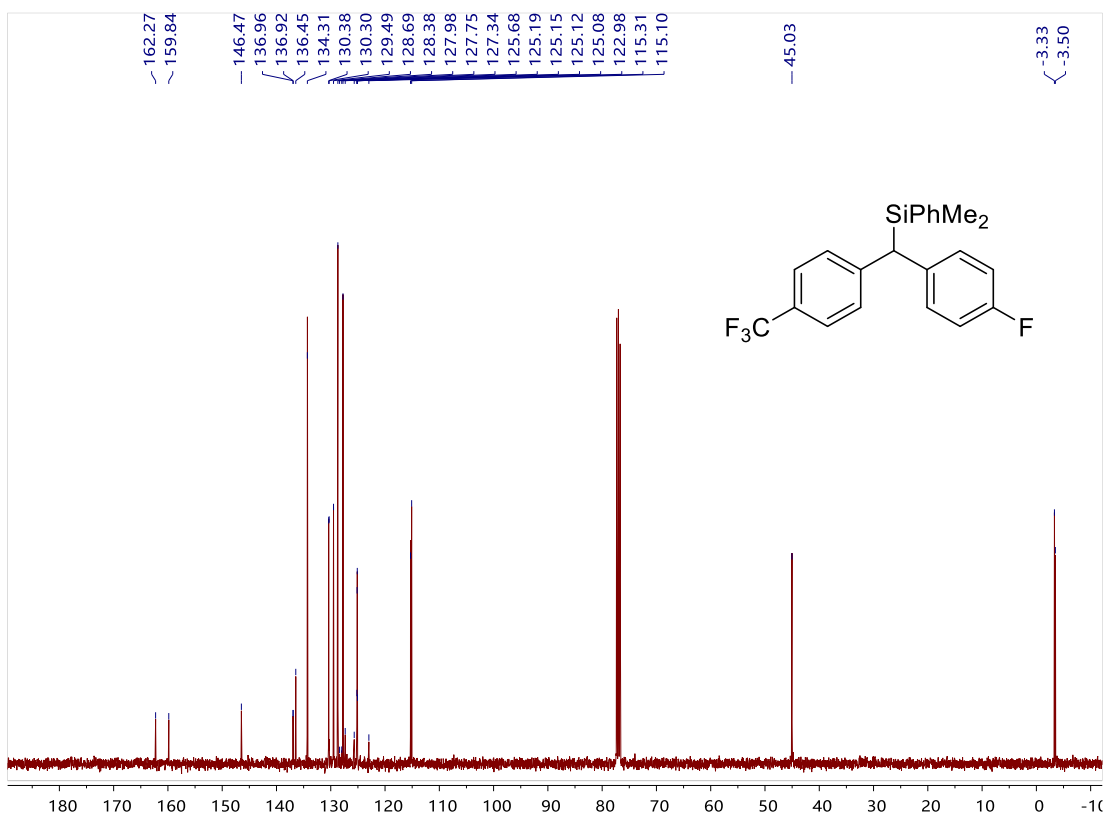

**(-)-((4-bromophenyl)(4-(trifluoromethyl)phenyl)methyl)dimethyl(phenyl)silane (P24)**

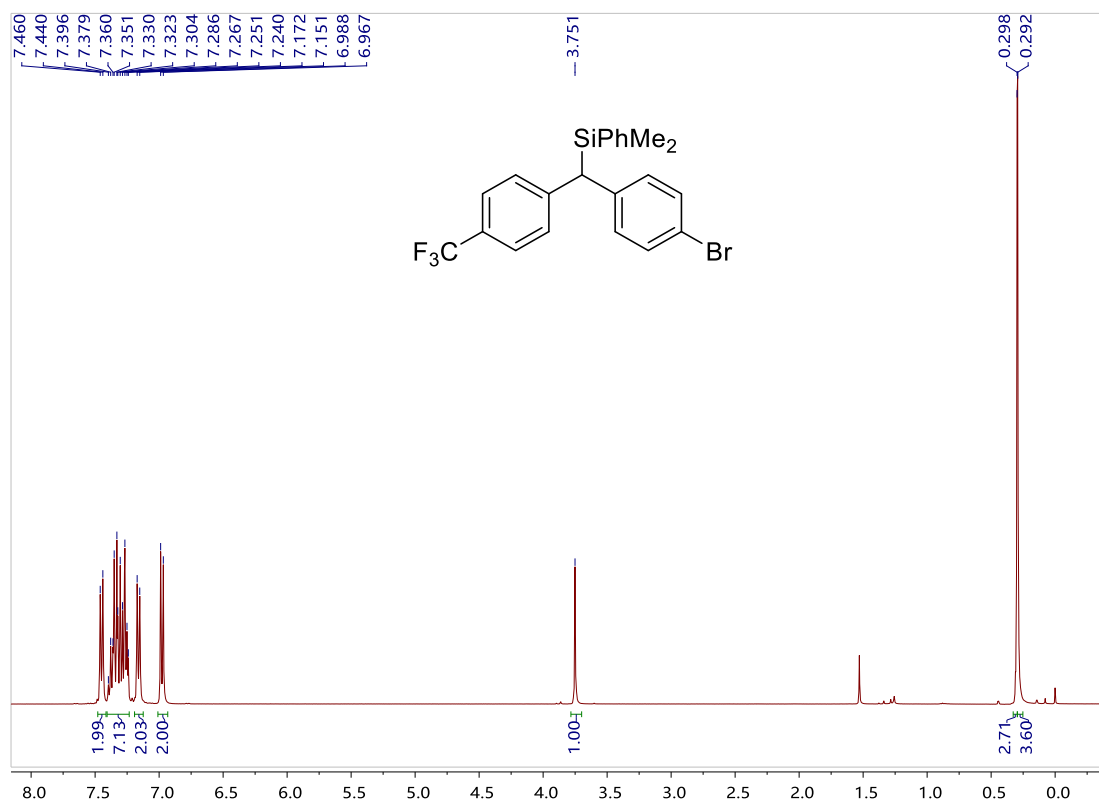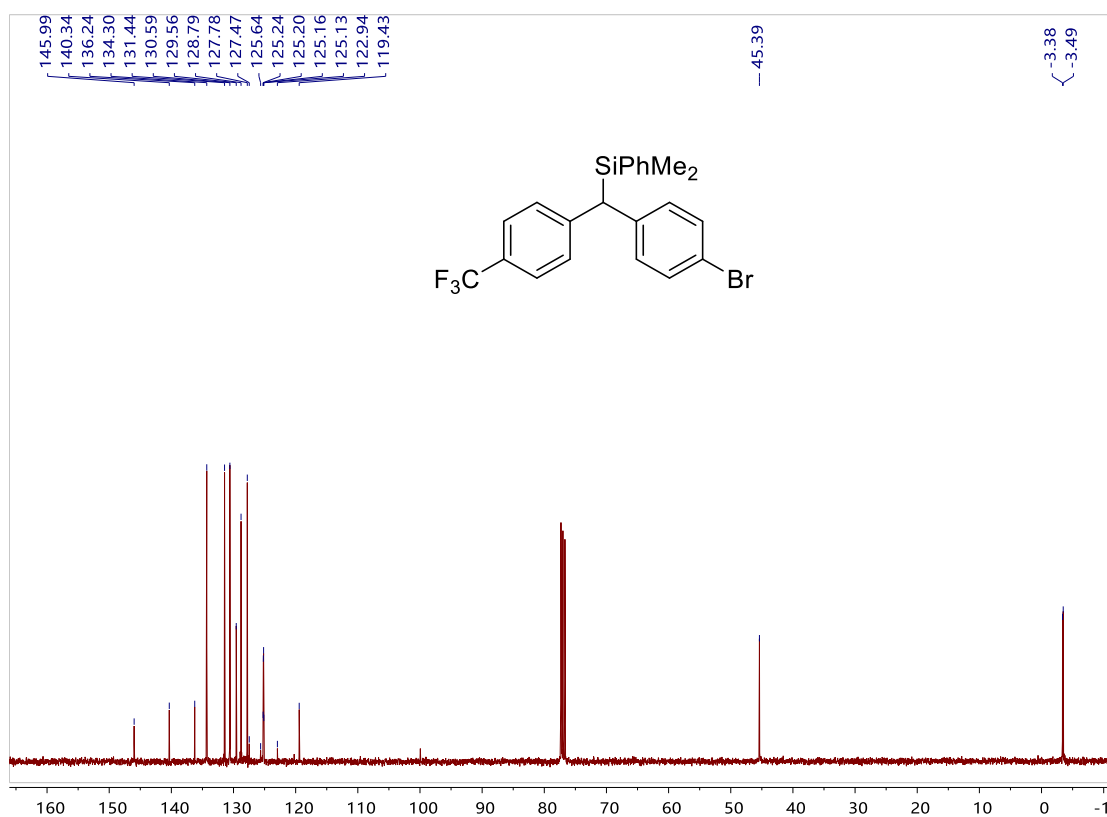



**(R)-((4-chlorophenyl)(4-(trifluoromethyl)phenyl)methyl)dimethyl(phenyl)silane (P25)**

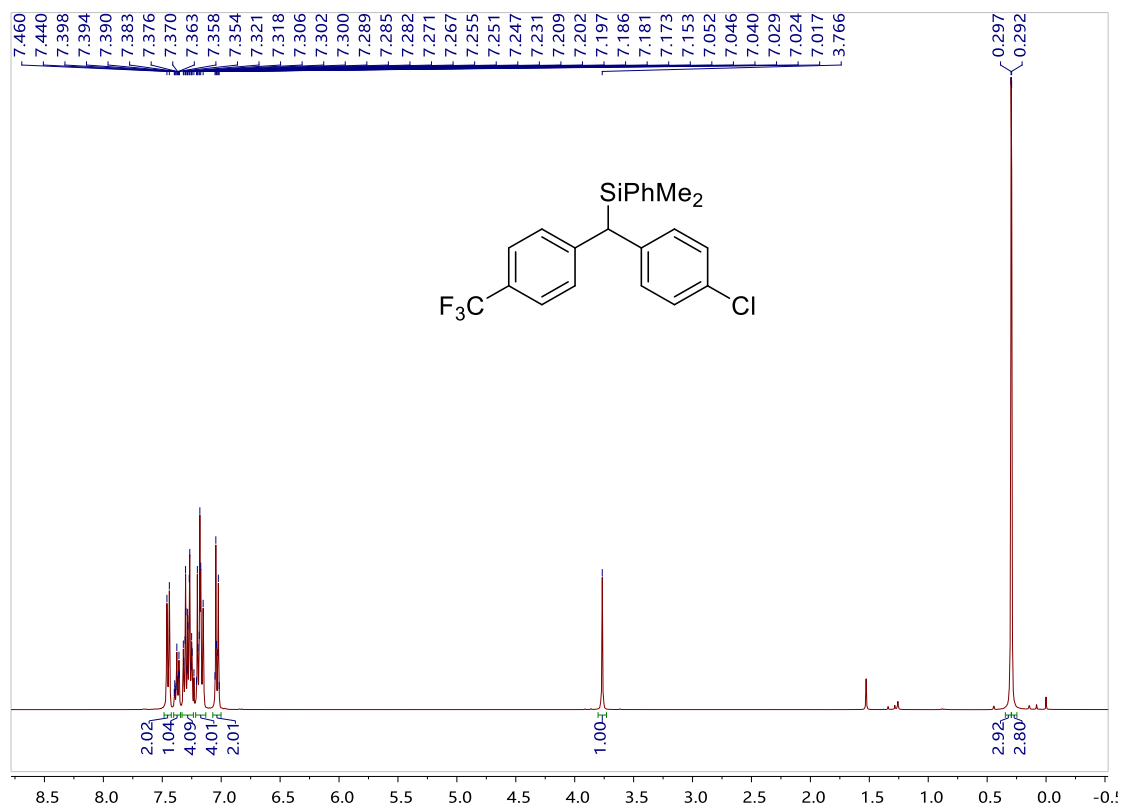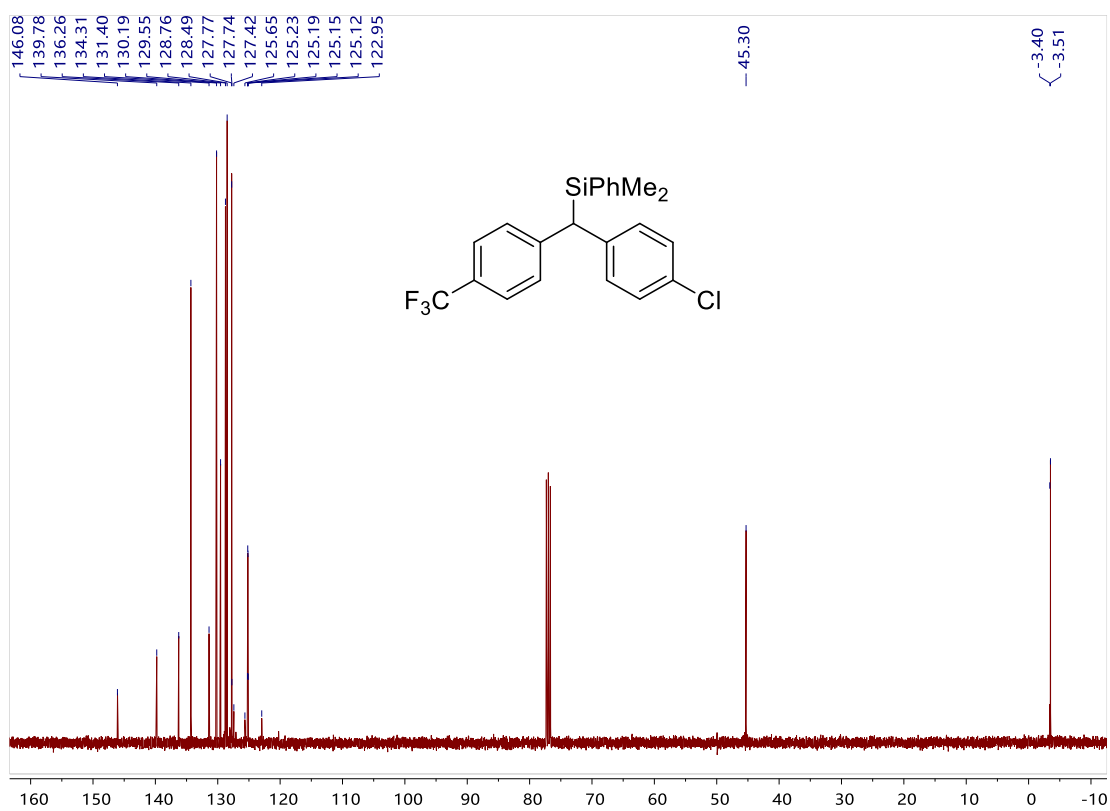

**(-)-((4-methoxyphenyl)(4-(trifluoromethoxy)phenyl)methyl)dimethyl(phenyl)silane (P26)**

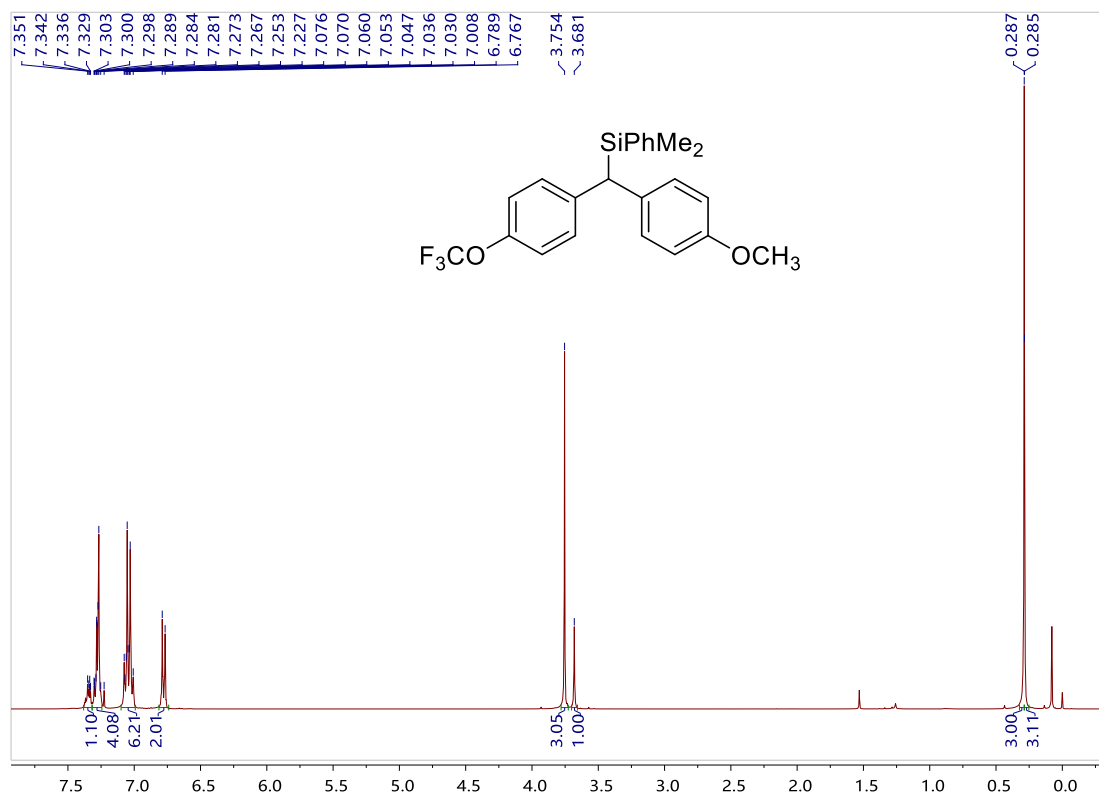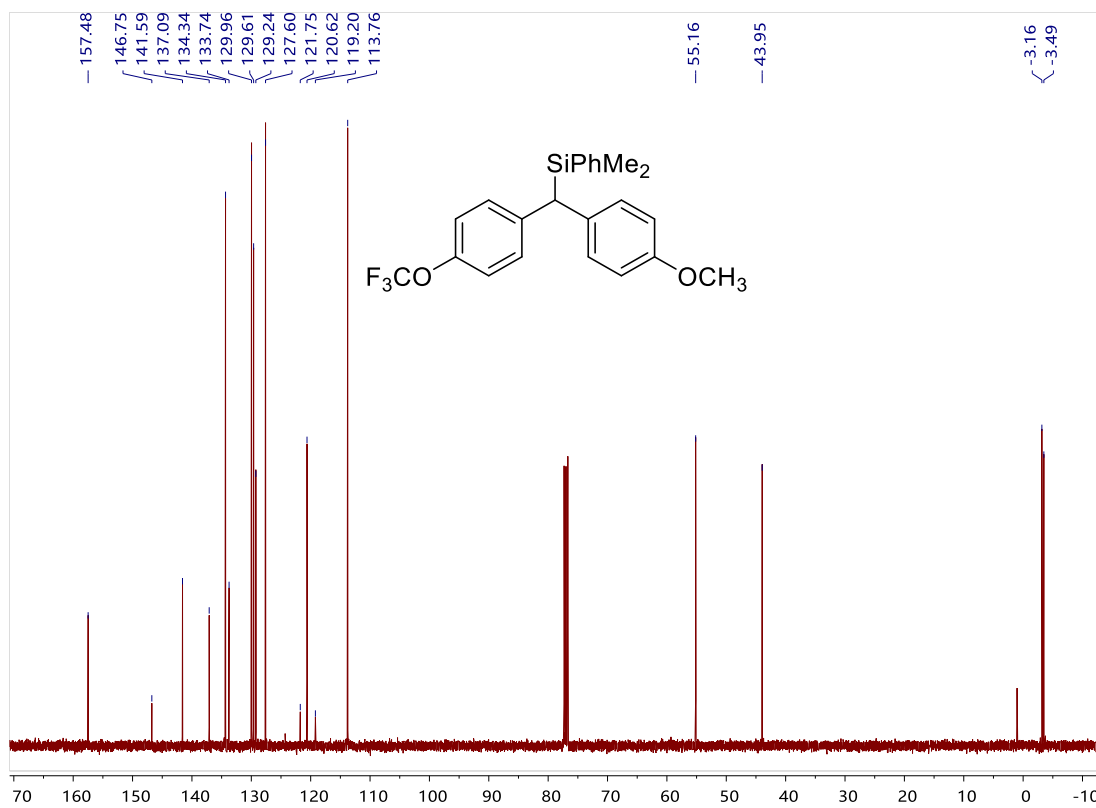

**(-)-((4-bromophenyl)(4-methoxyphenyl)methyl)dimethyl(phenyl)silane (P27)**

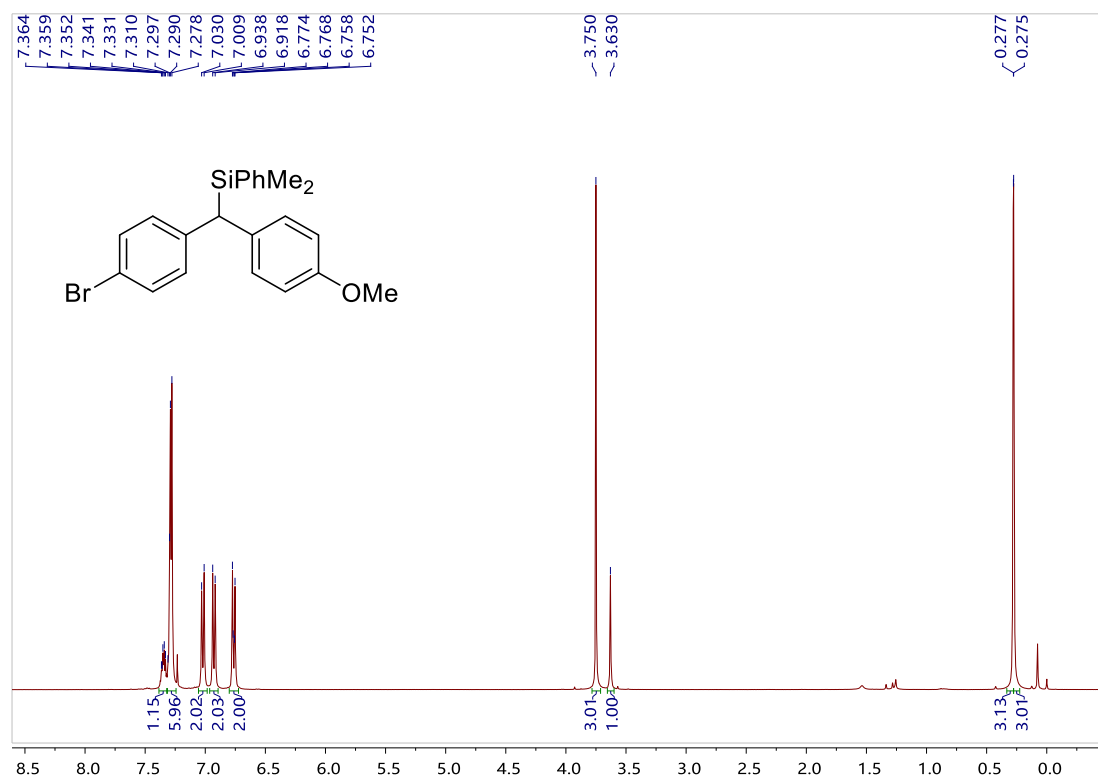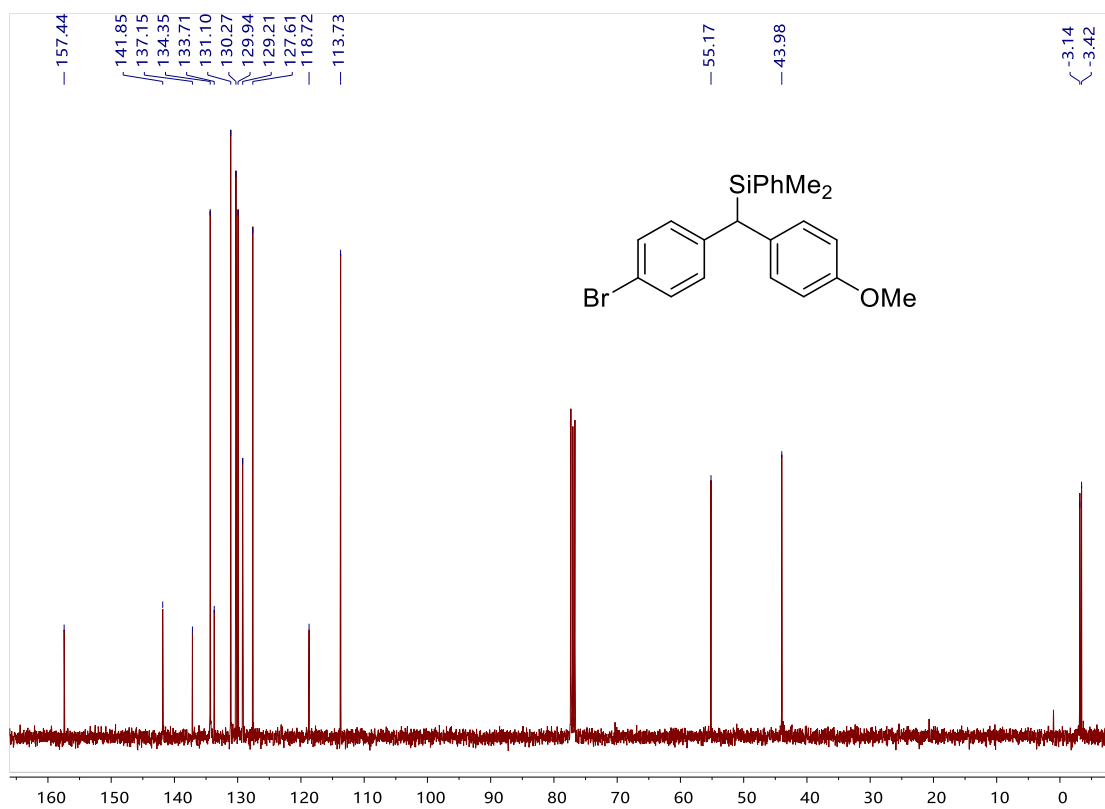

**(-)-((4-chlorophenyl)(4-methoxyphenyl)methyl)dimethyl(phenyl)silane (P28)**

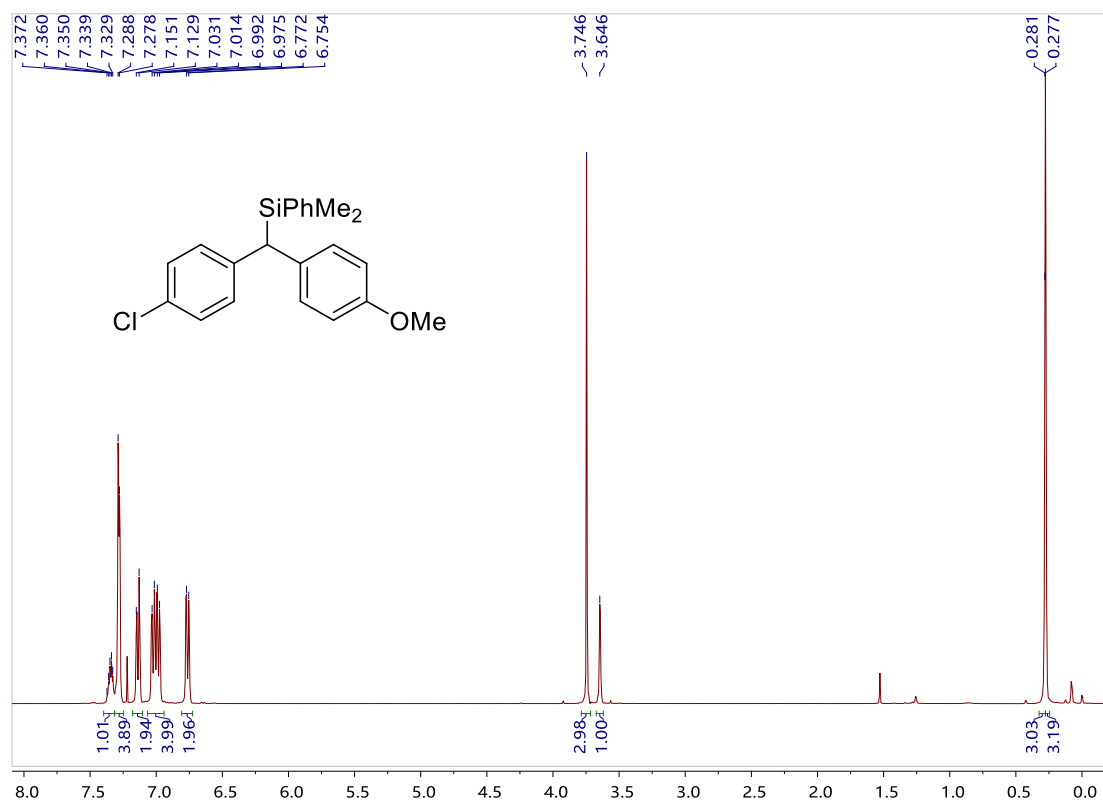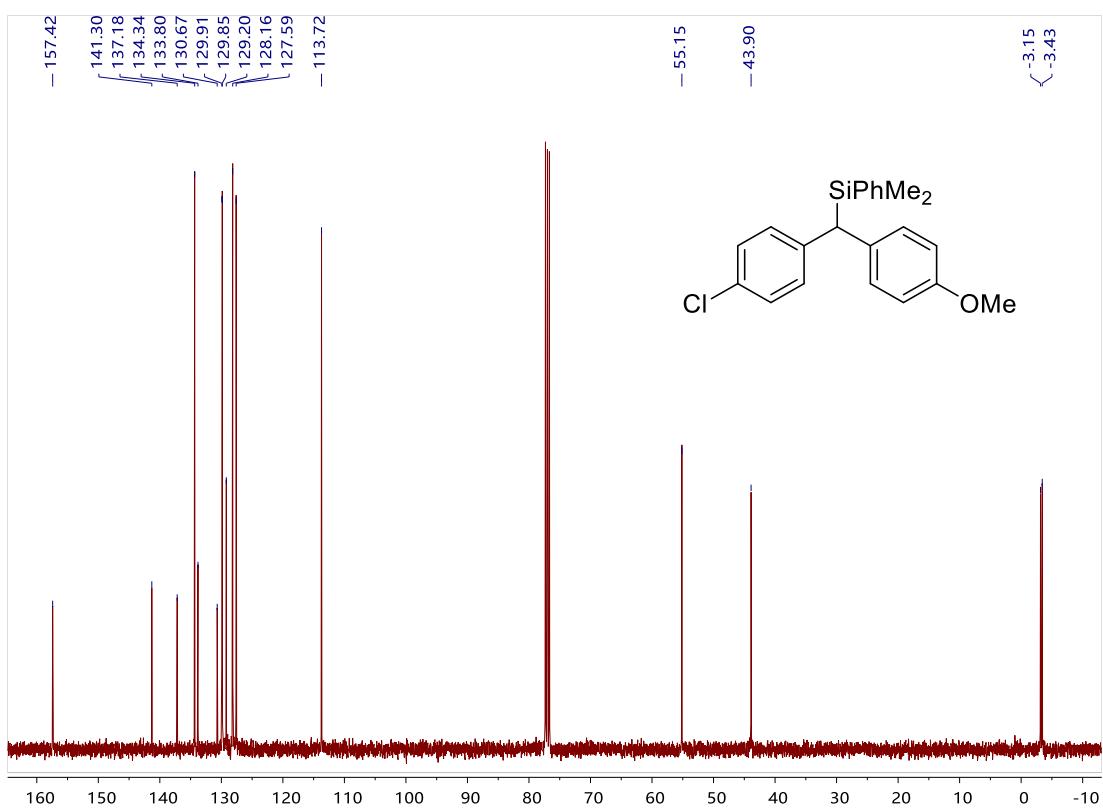

**(R)-((4-fluorophenyl)(4-methoxyphenyl)methyl)dimethyl(phenyl)silane (P29)**

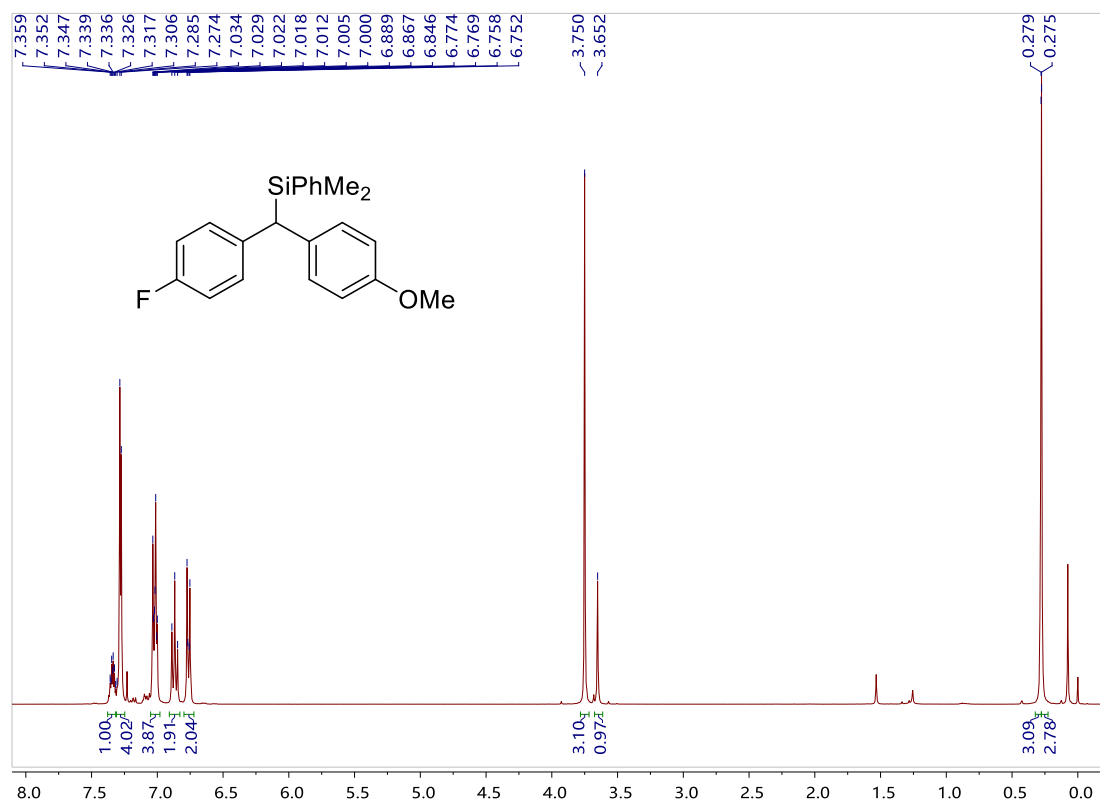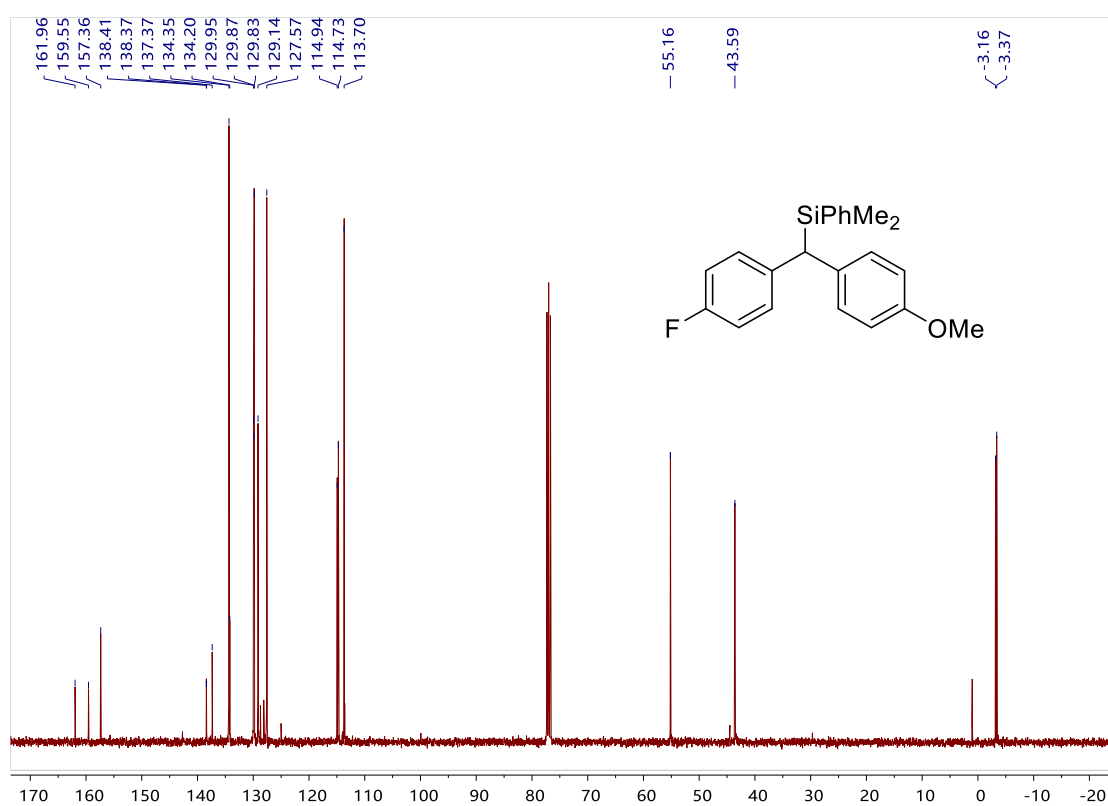

**(-)-((4-methoxyphenyl)(p-tolyl)methyl)dimethyl(phenyl)silane (P30)**

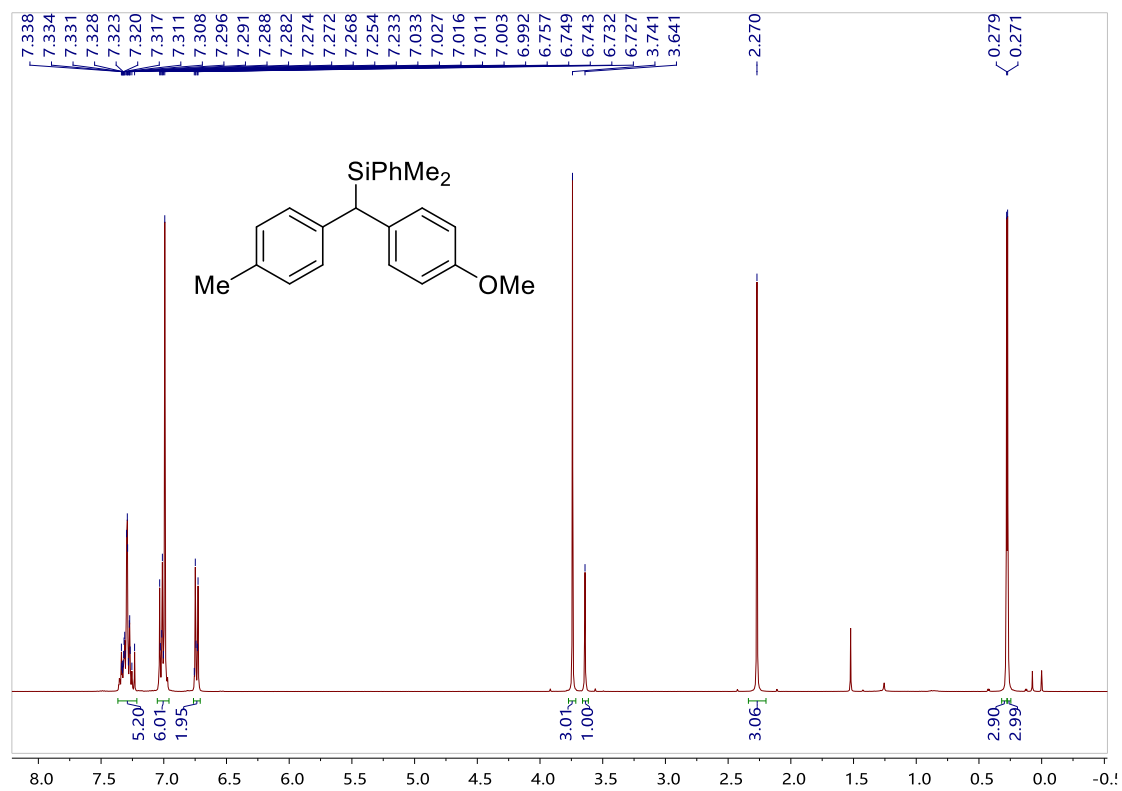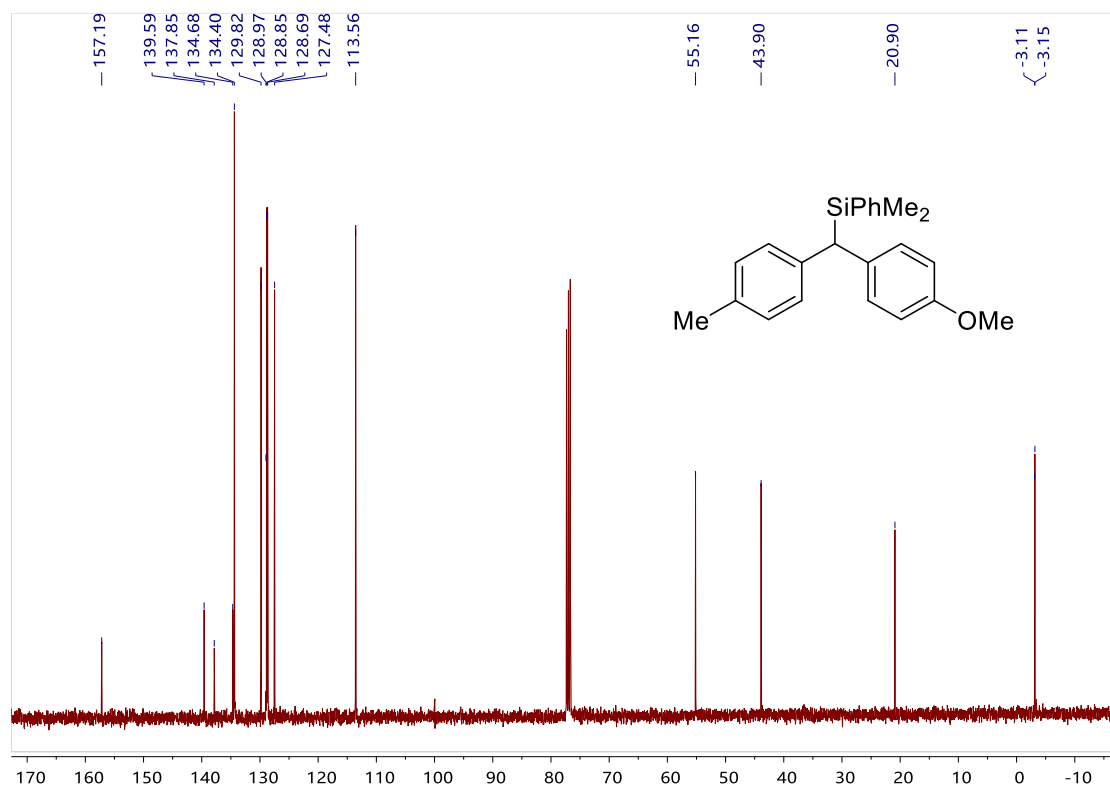

**(+)-dimethyl(naphthalen-2-yl(phenyl)methyl)(phenyl)silane (P31)**

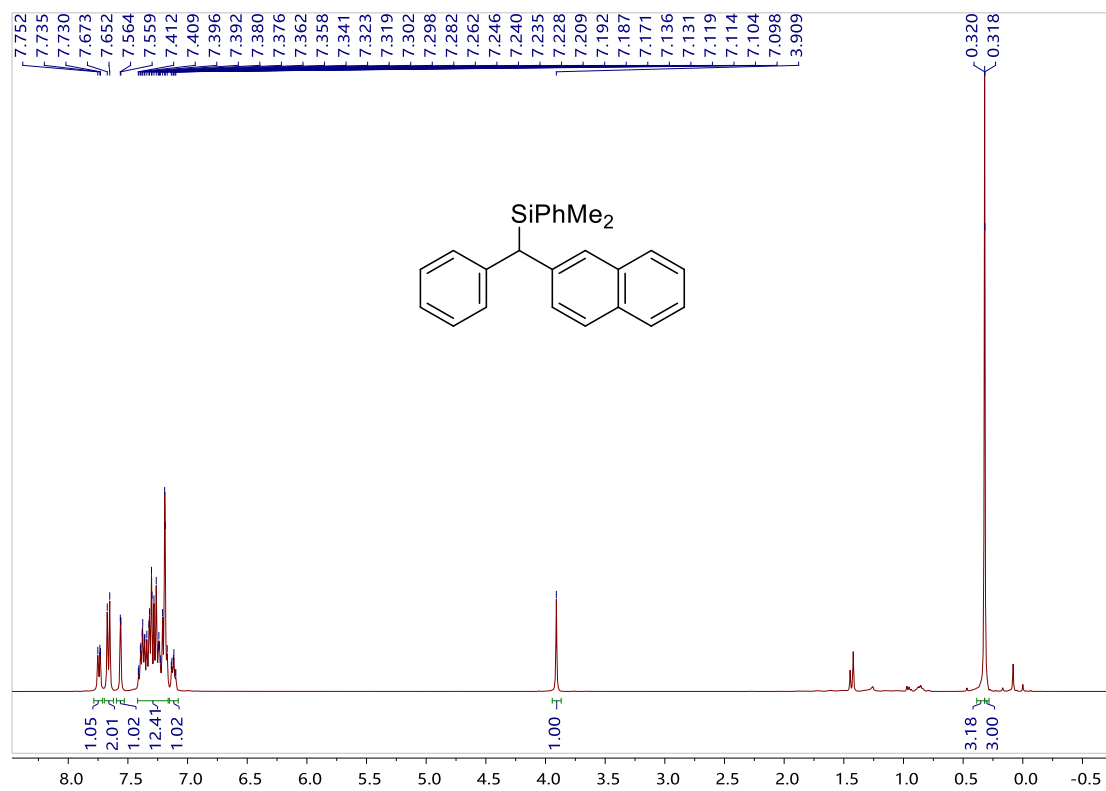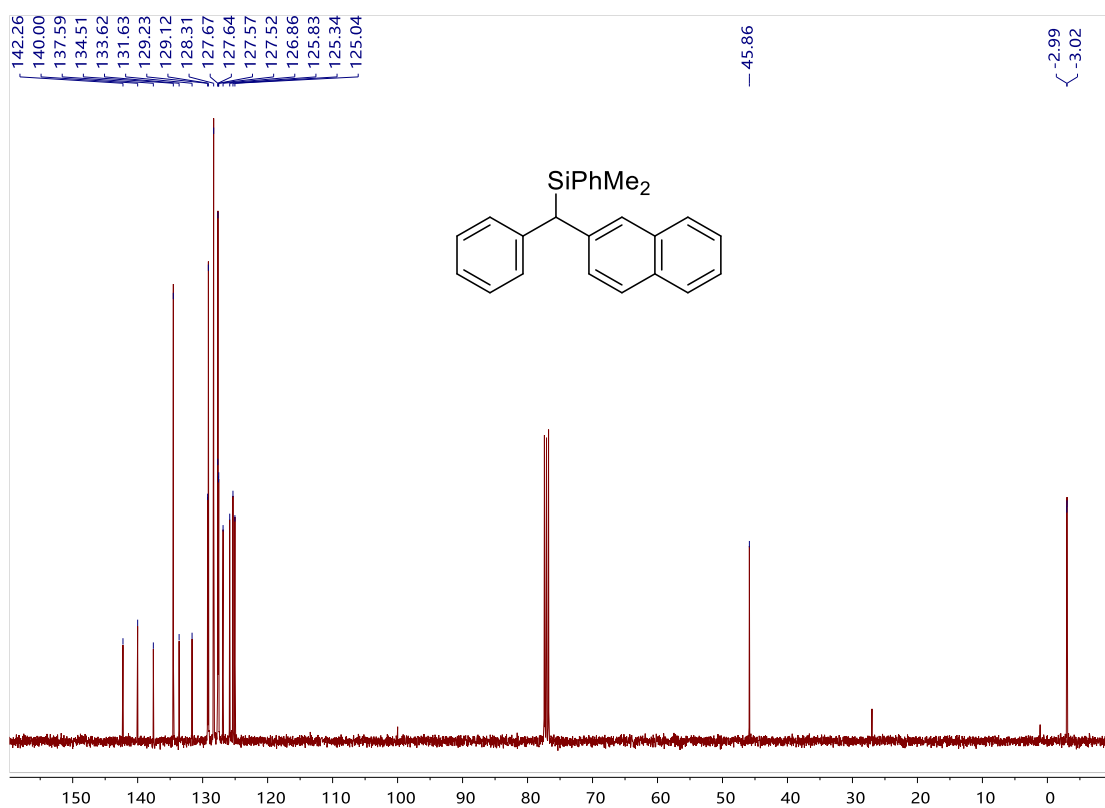

**(-)-dimethyl(naphthalen-2-yl(4-nitrophenyl)methyl)(phenyl)silane (P32)**

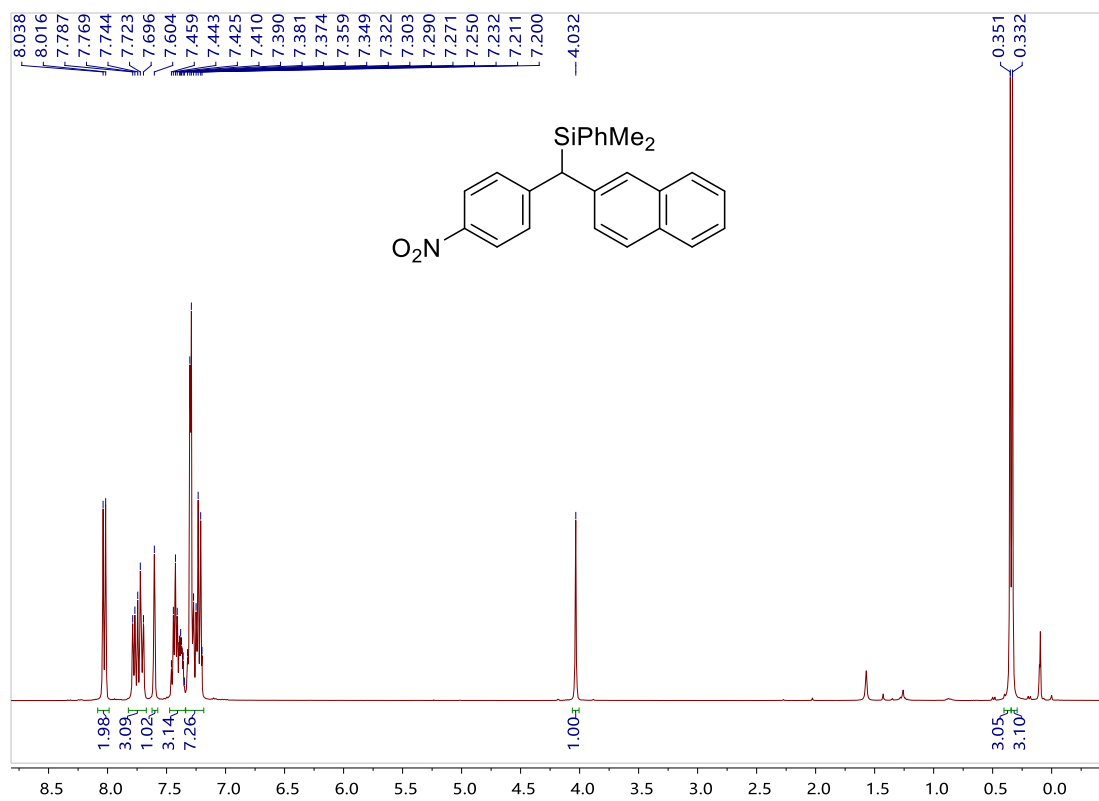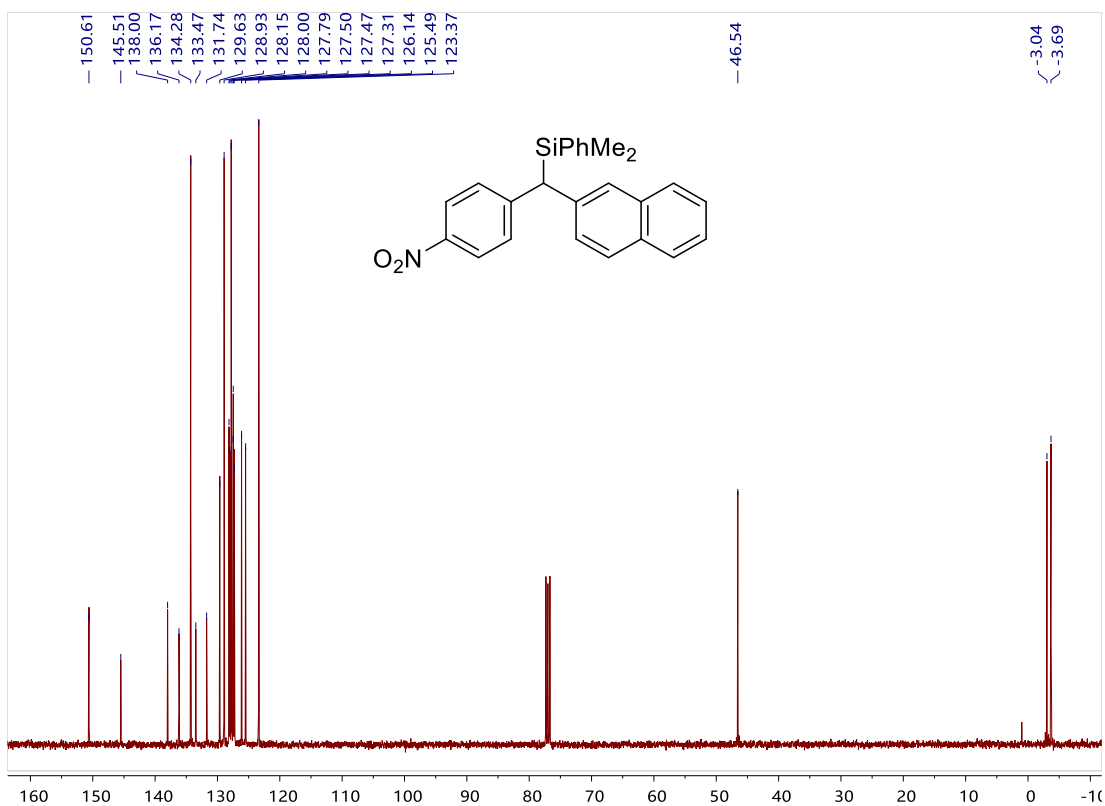



**(-)-((2-methoxyphenyl)(phenyl)methyl)dimethyl(phenyl)silane (P33)**

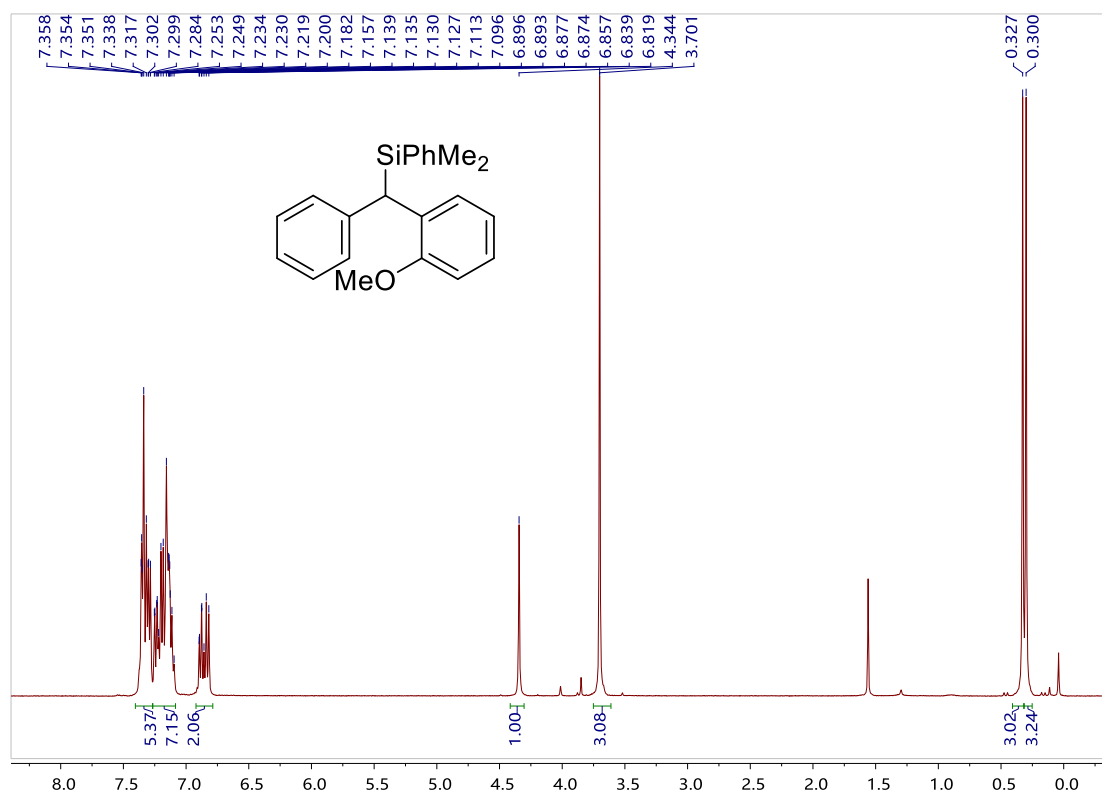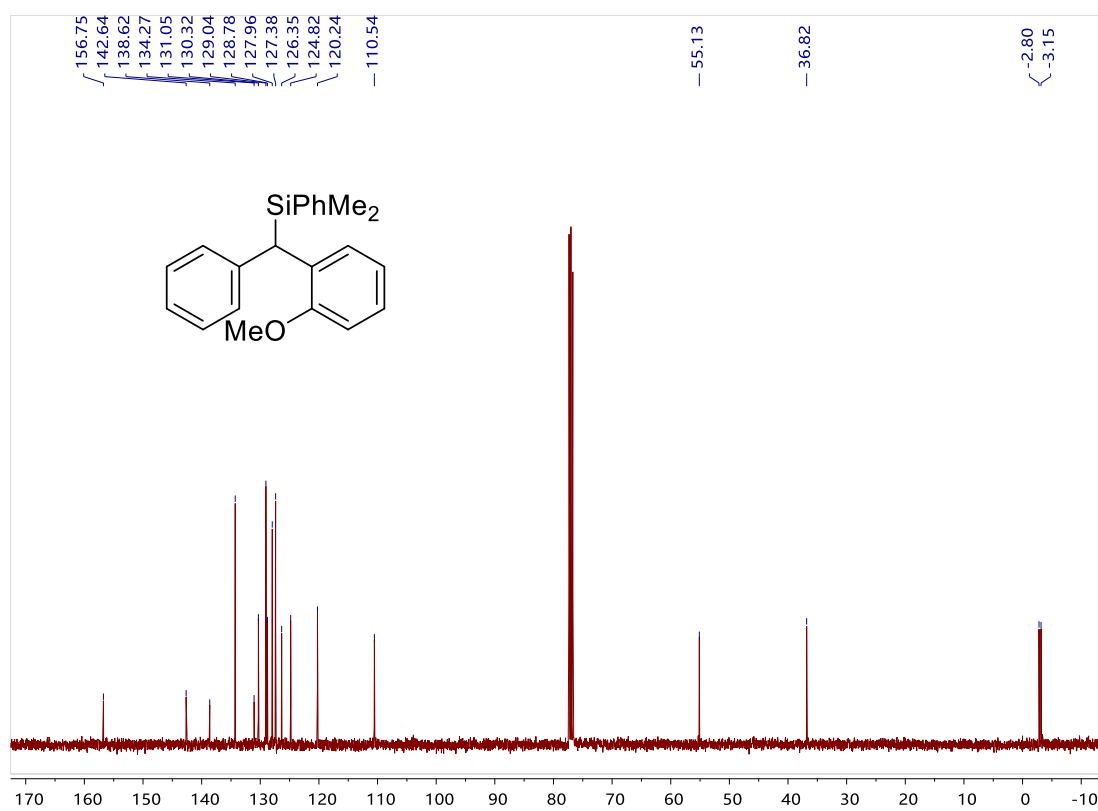

**(-)-((2-methoxyphenyl)(4-nitrophenyl)methyl)dimethyl(phenyl)silane (P34)**

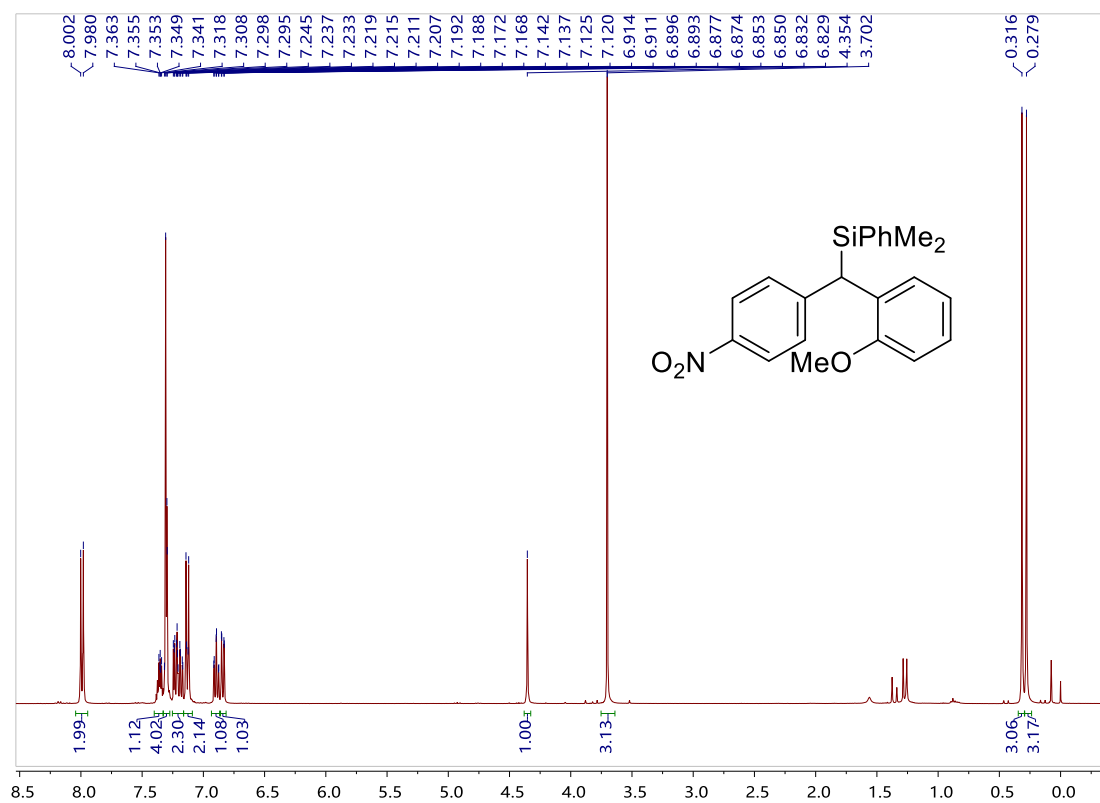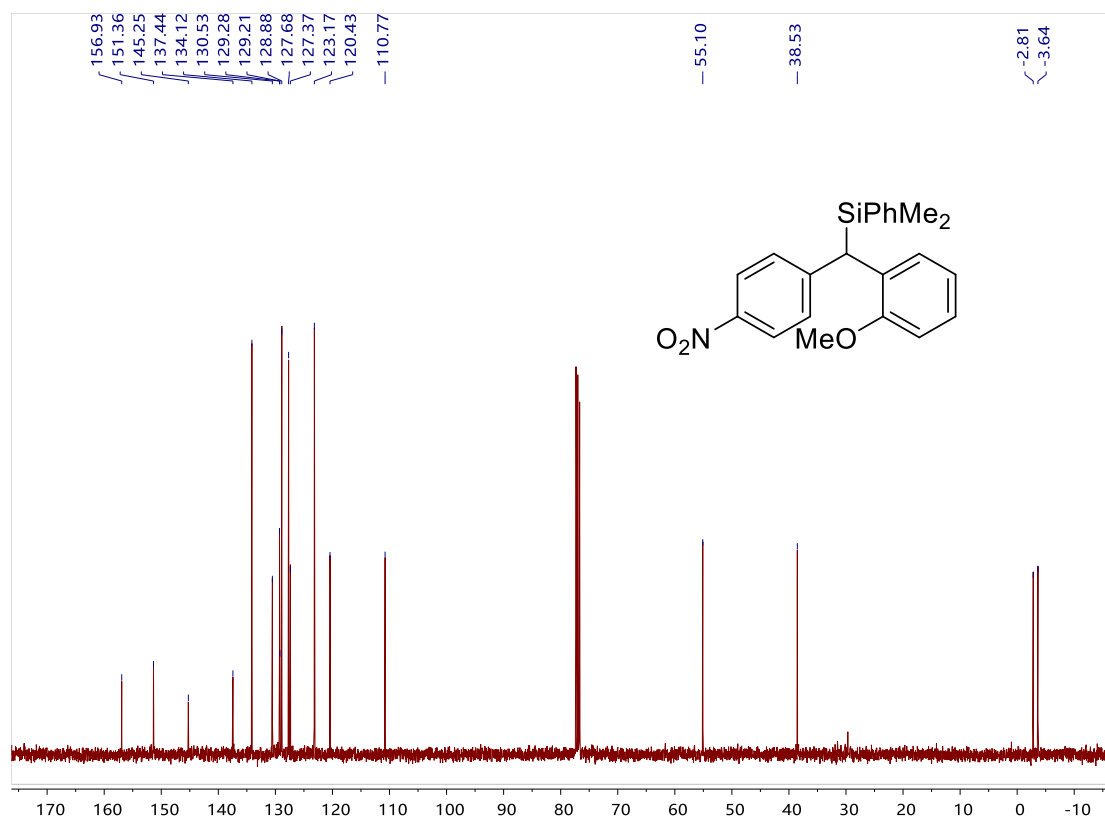

**(-)-((3-methoxyphenyl)(4-nitrophenyl)methyl)dimethyl(phenyl)silane (P35)**

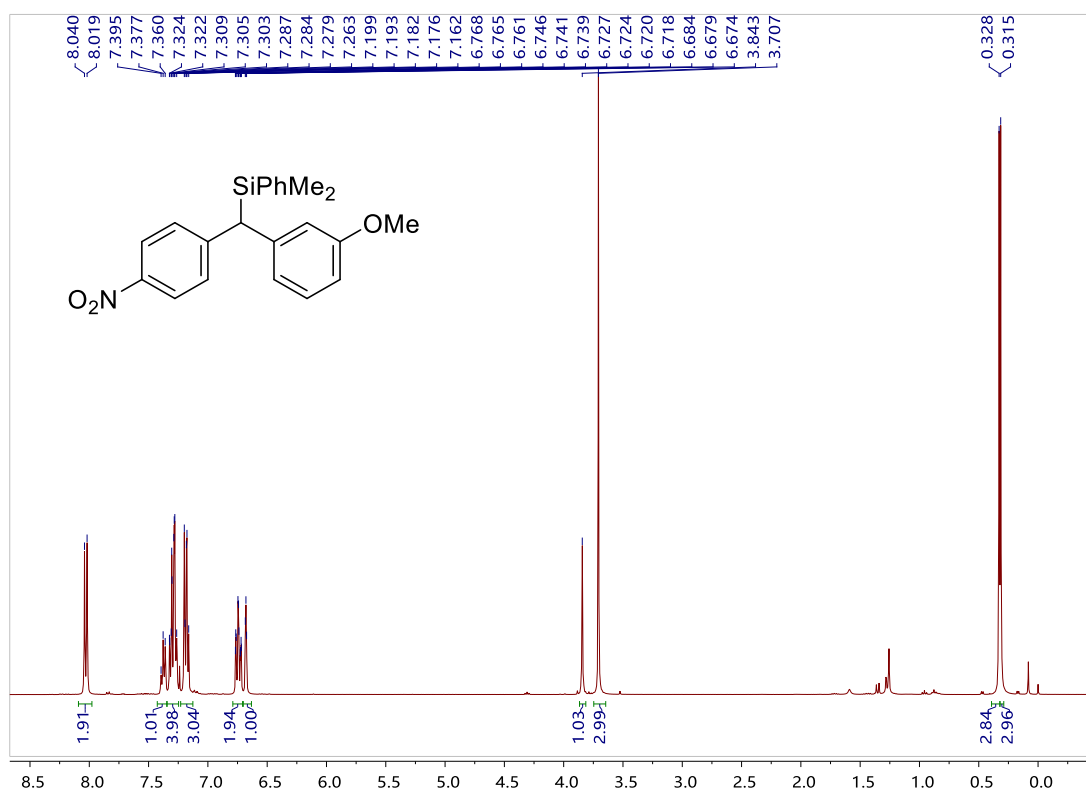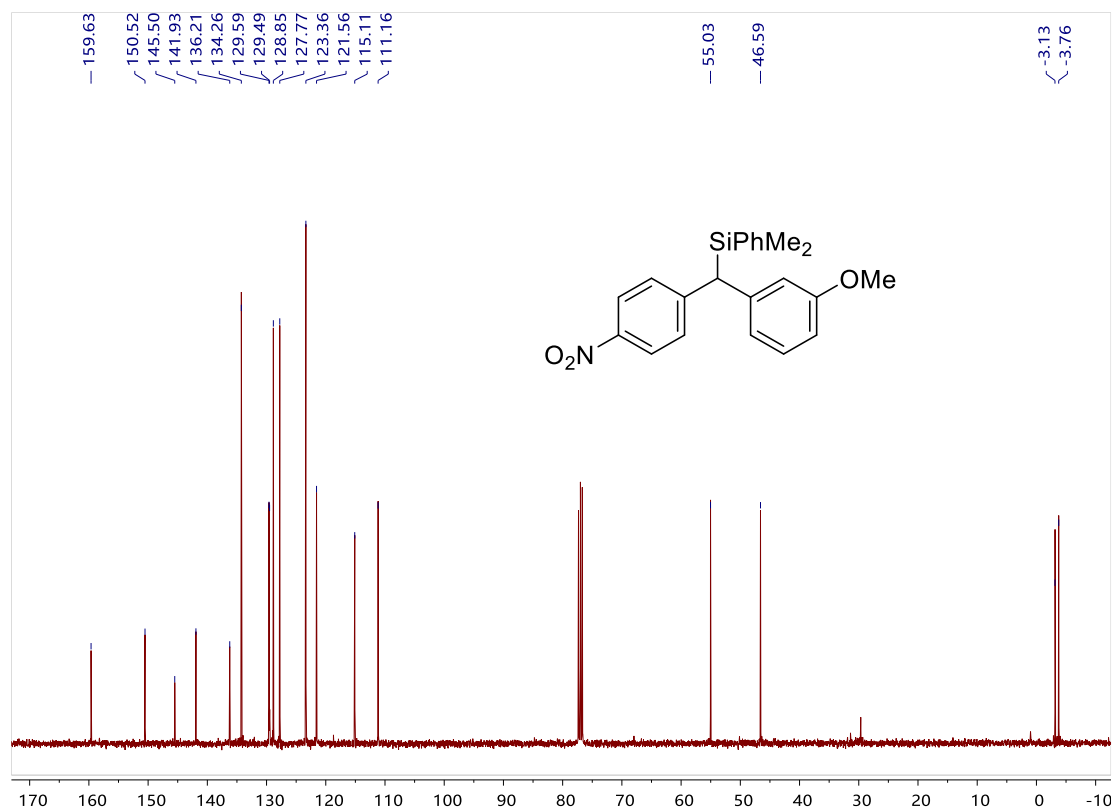

**(-)-(benzo[d][1,3]dioxol-5-yl(4-nitrophenyl)methyl)dimethyl(phenyl)silane (P36)**

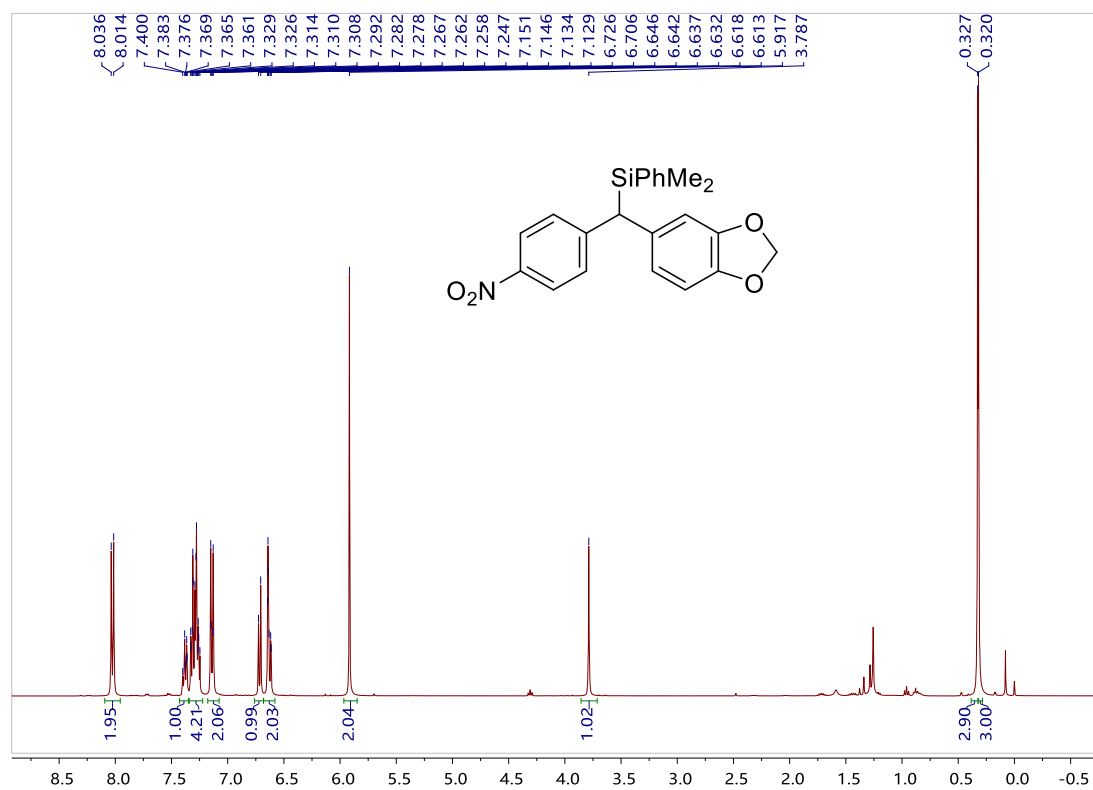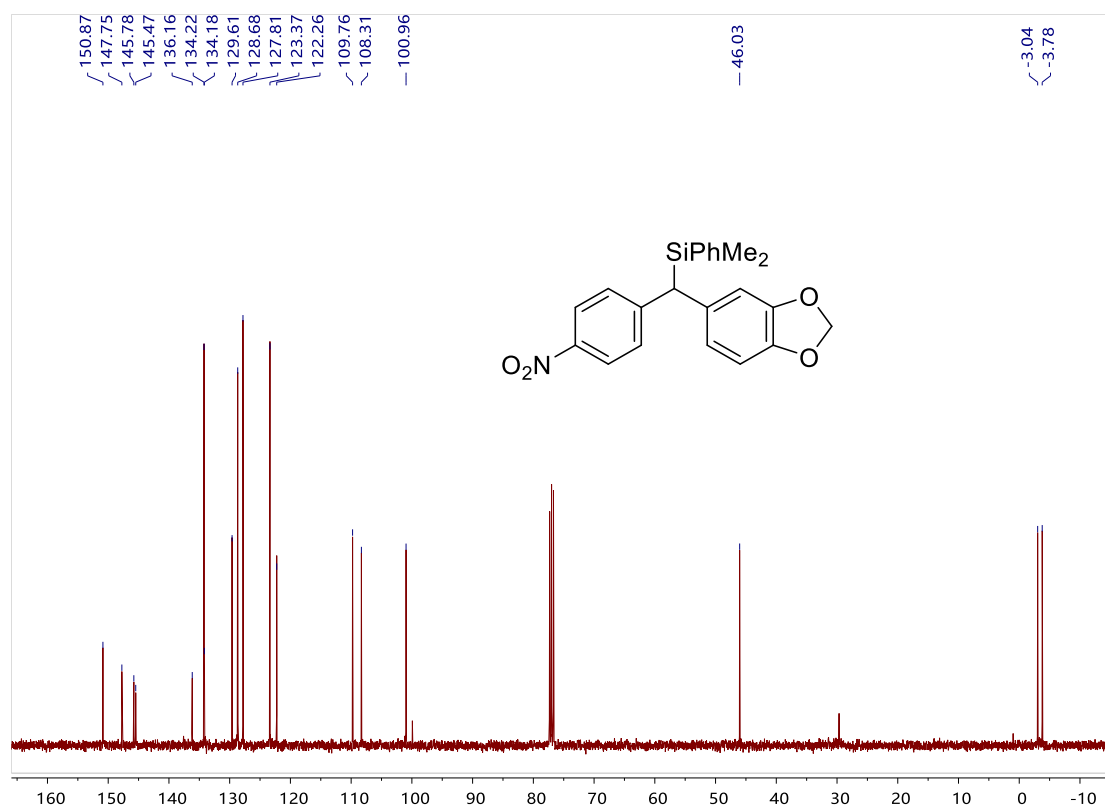

**(-)-(benzofuran-5-yl(4-(trifluoromethyl)phenyl)methyl)dimethyl(phenyl)silane (P37)**

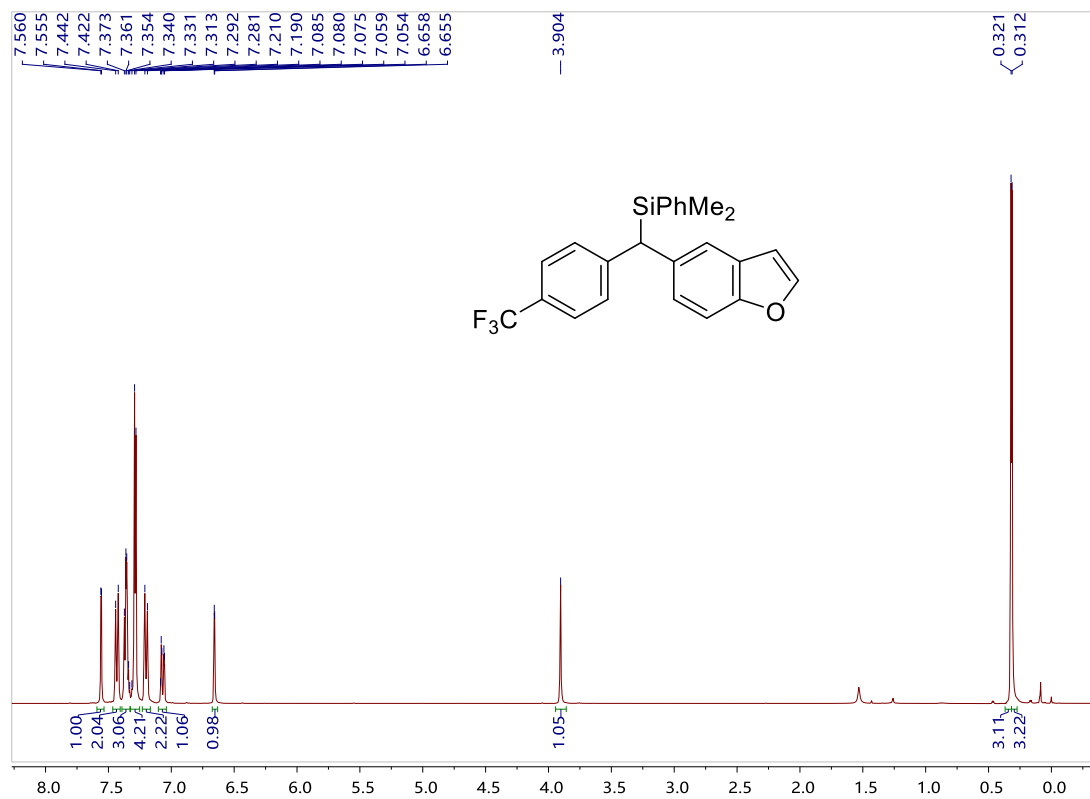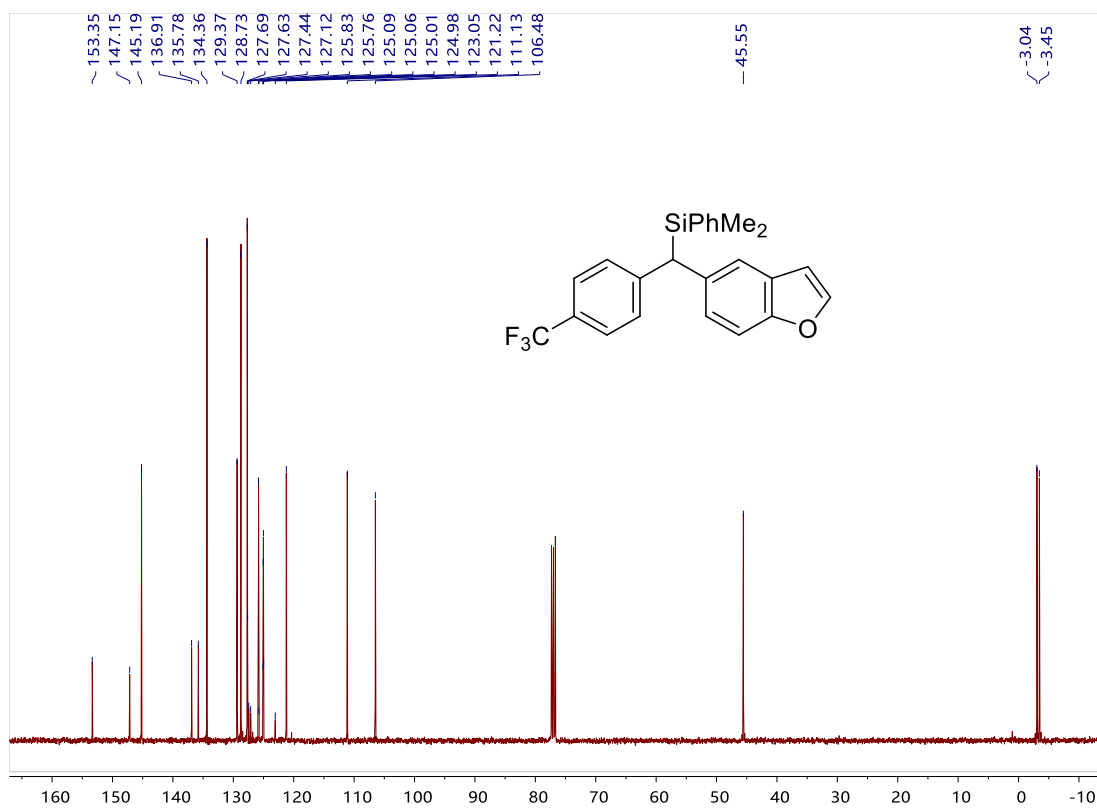

**(-)-5-((dimethyl(phenyl)silyl)(4-(trifluoromethyl)phenyl)methyl)-1H-indole (P38)**

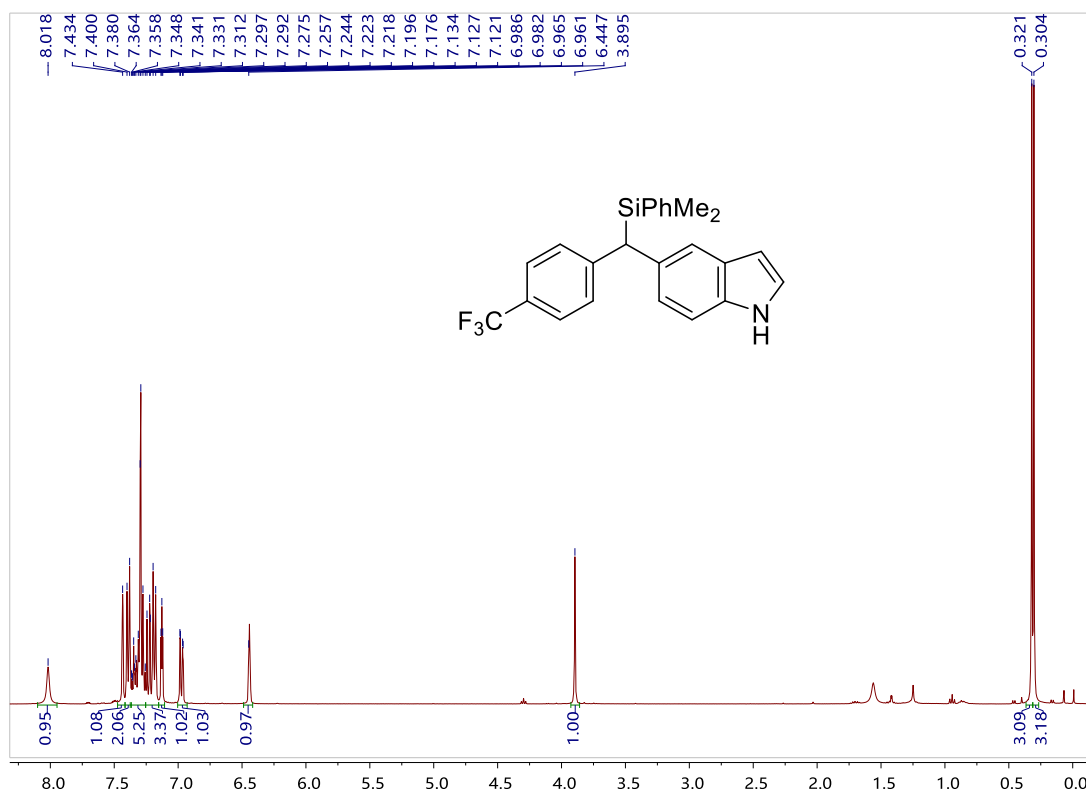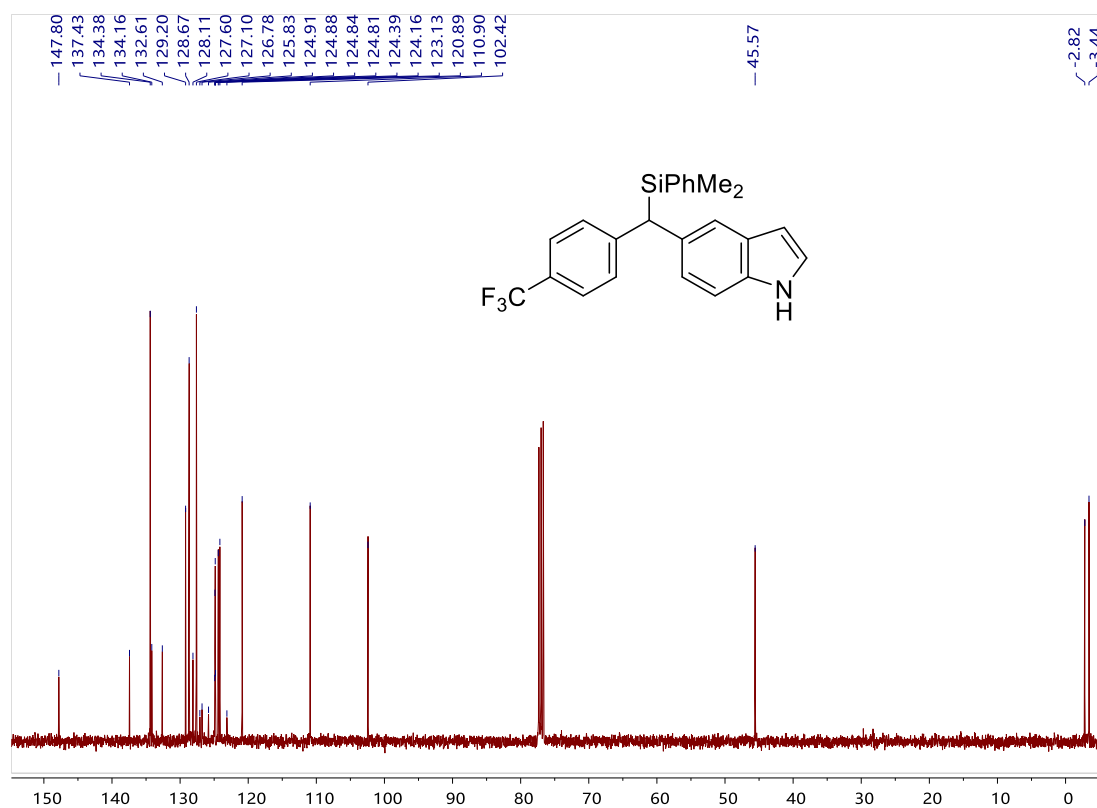

**(+)-(2-chlorophenyl)(phenyl)methyl dimethyl(phenyl)silane (P39)**

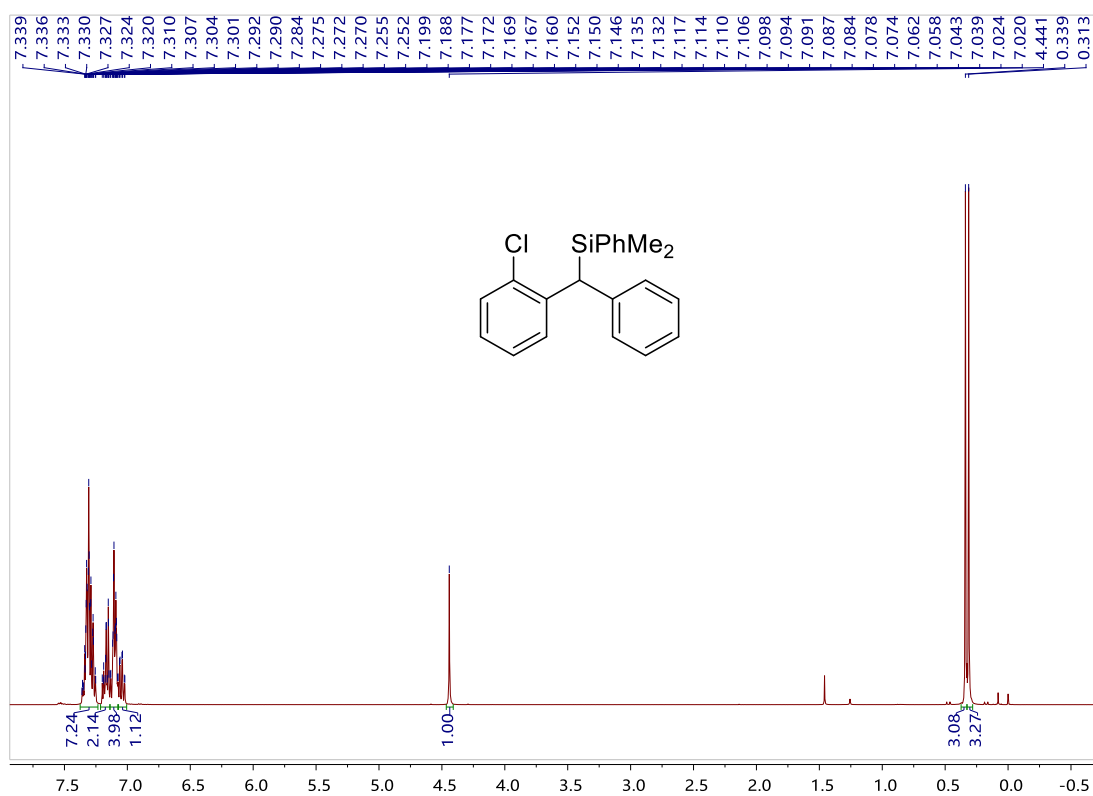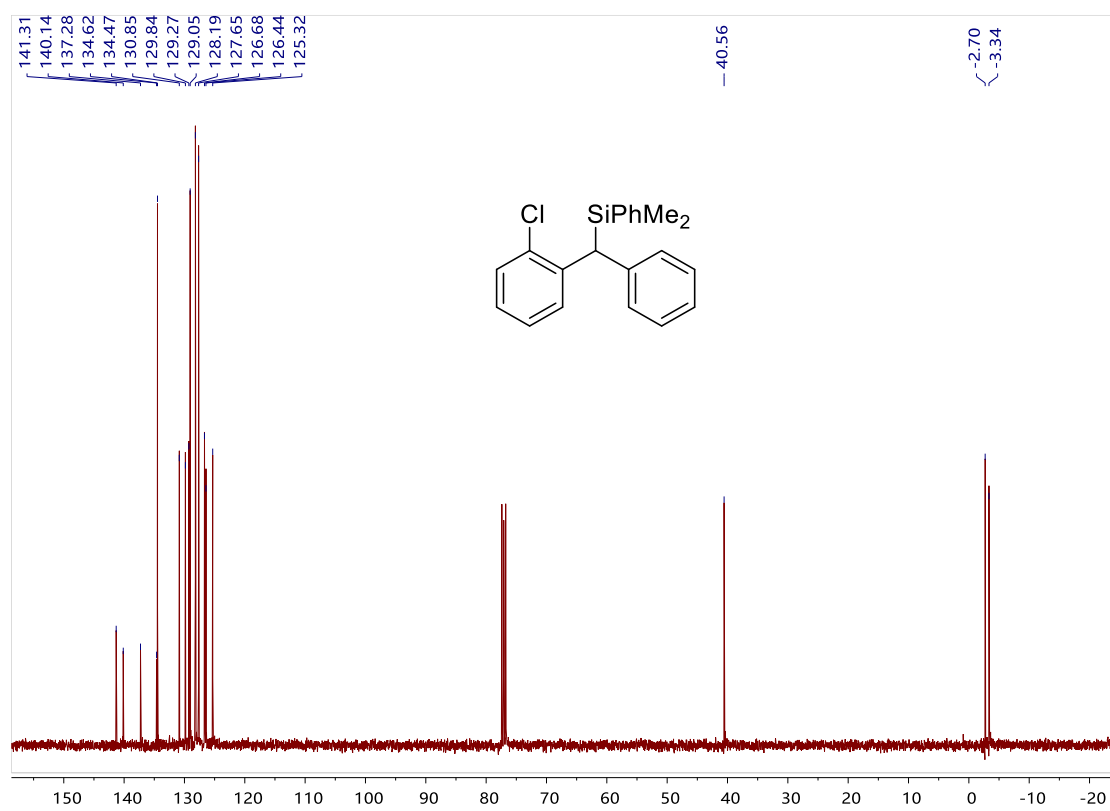

**(+)-(2-bromophenyl)(phenyl)methyl)dimethyl(phenyl)silane (P40)**

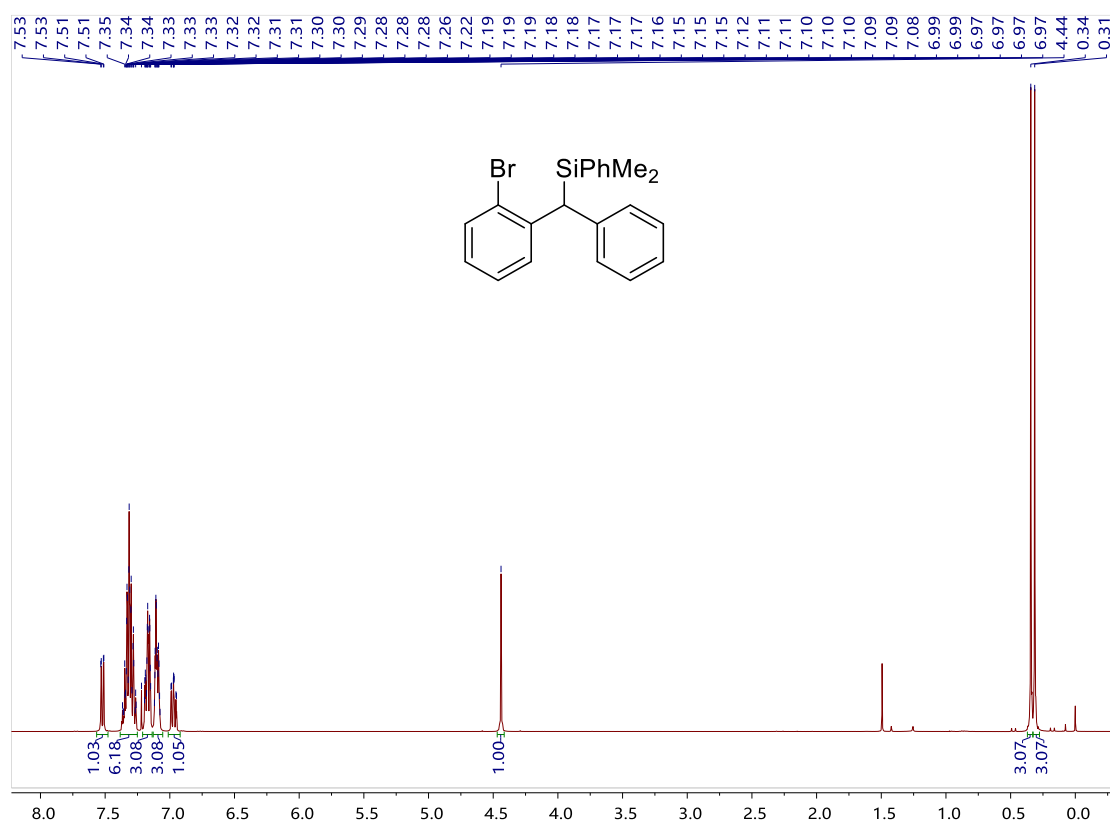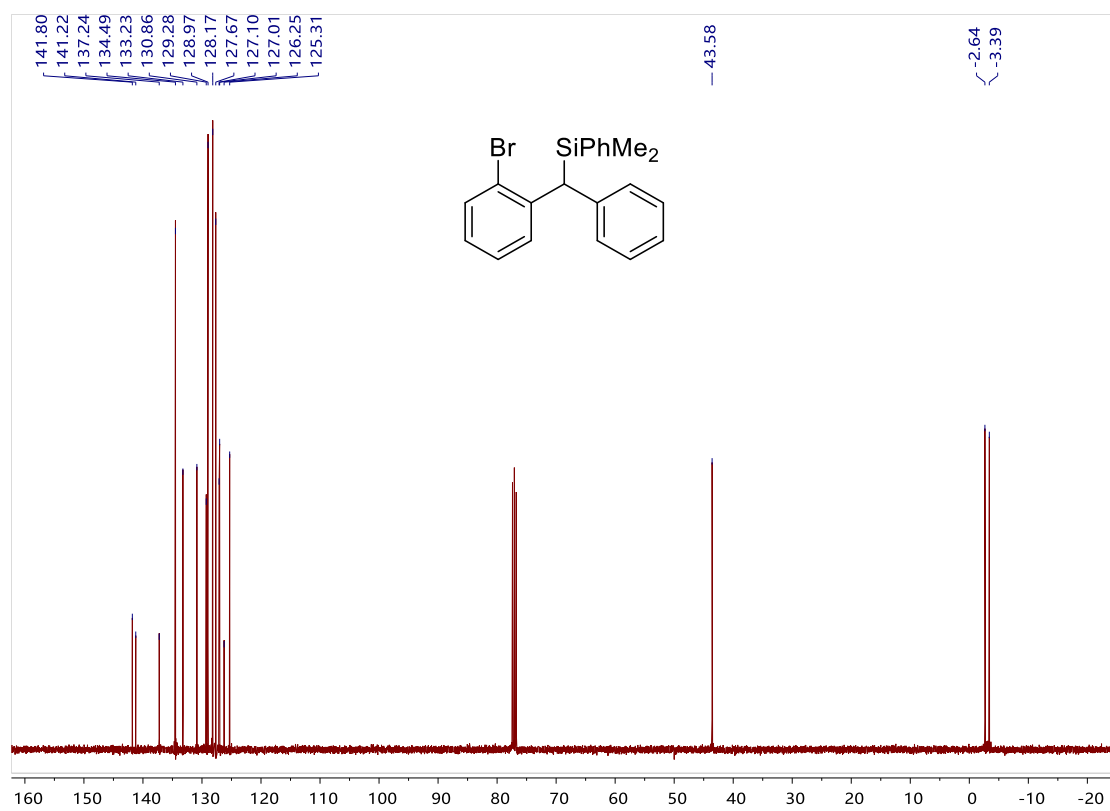



**(+)-(2-fluorophenyl)(phenyl)methyl)dimethyl(phenyl)silane (P41)**

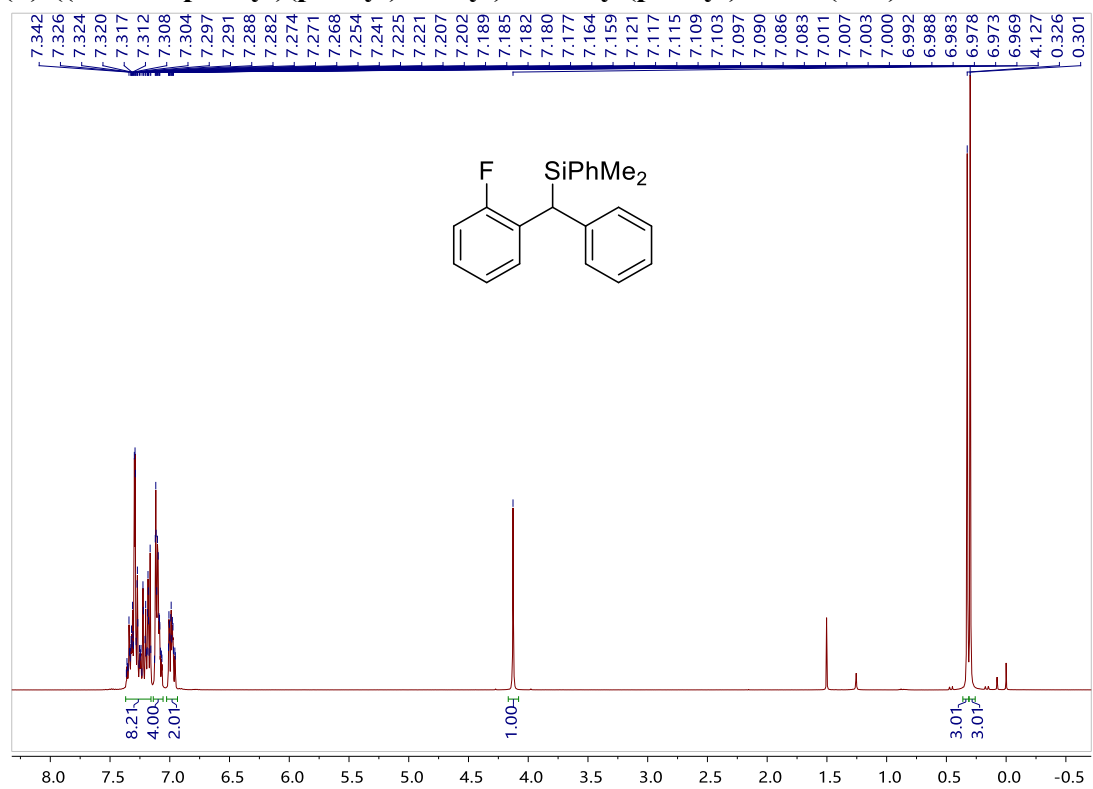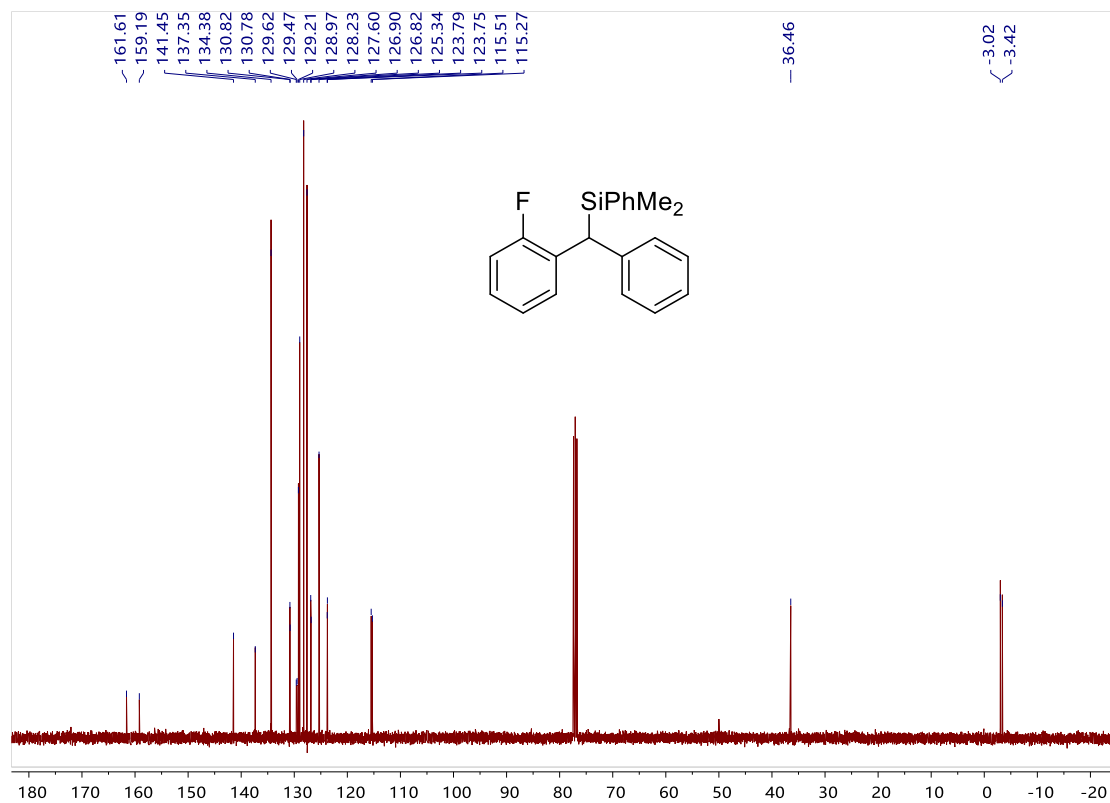

**(-)-((2-fluorophenyl)(4-methoxyphenyl)methyl)dimethyl(phenyl)silane (P42)**

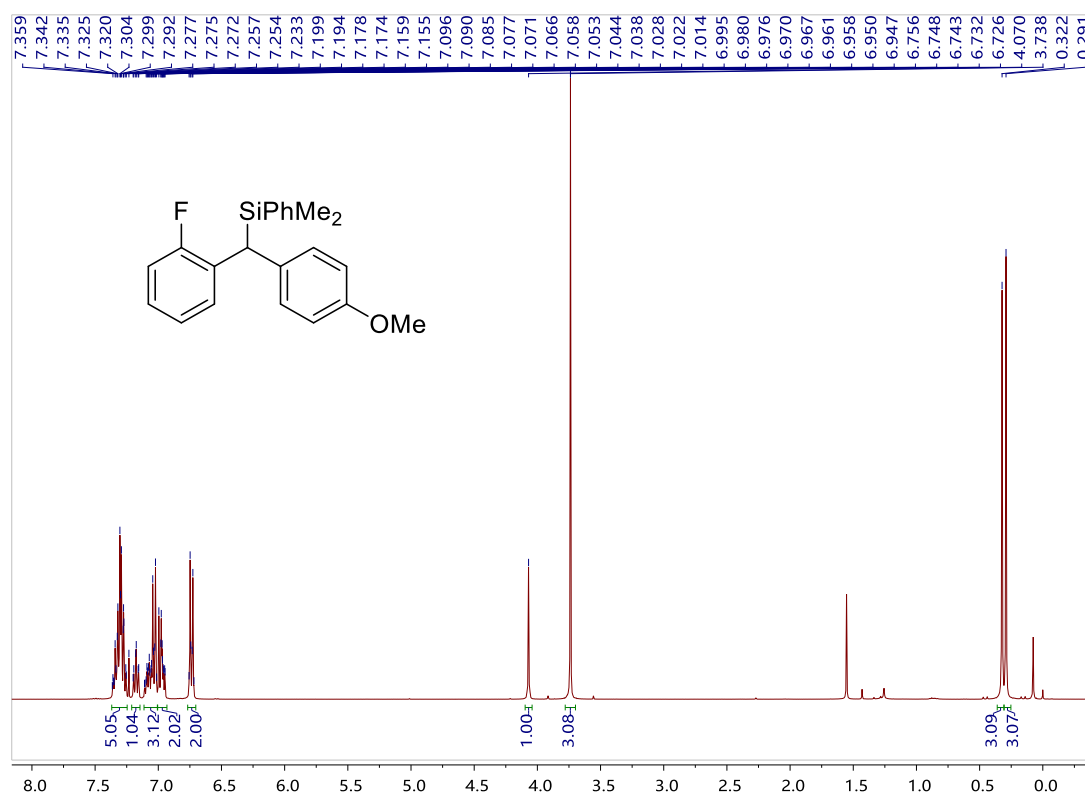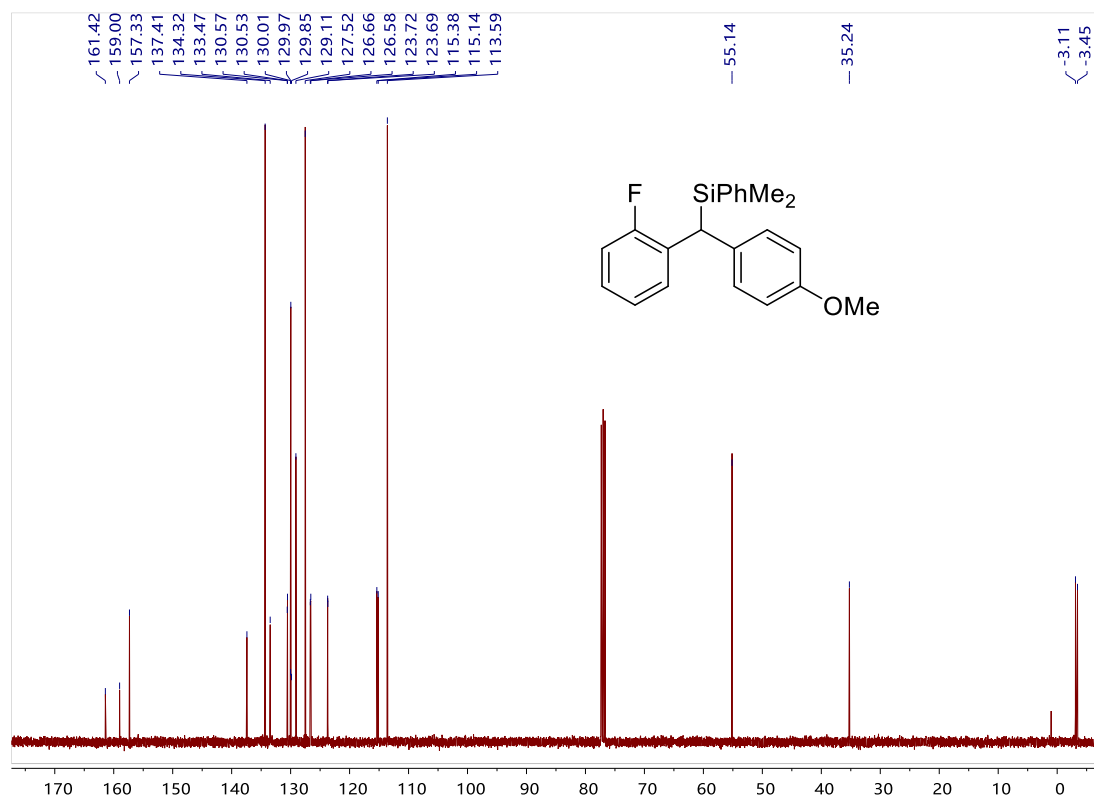

**(-)-ethoxydimethyl((4-nitrophenyl)(phenyl)methyl)silane (P43)**

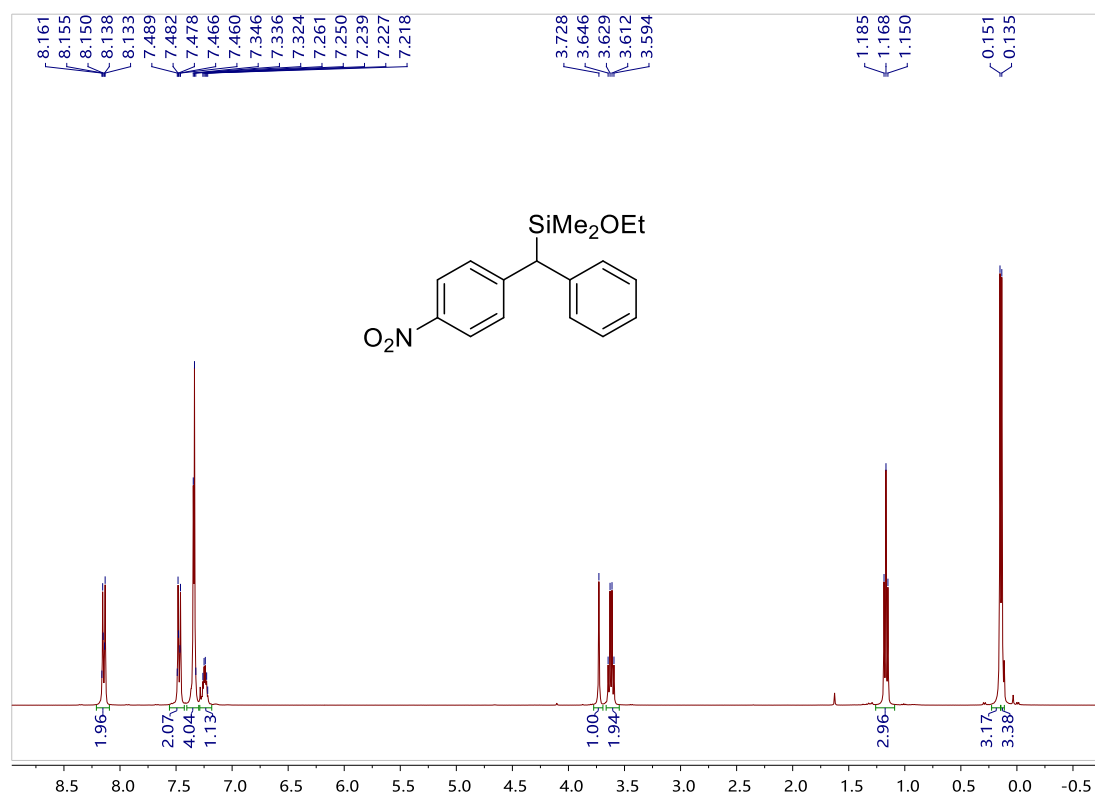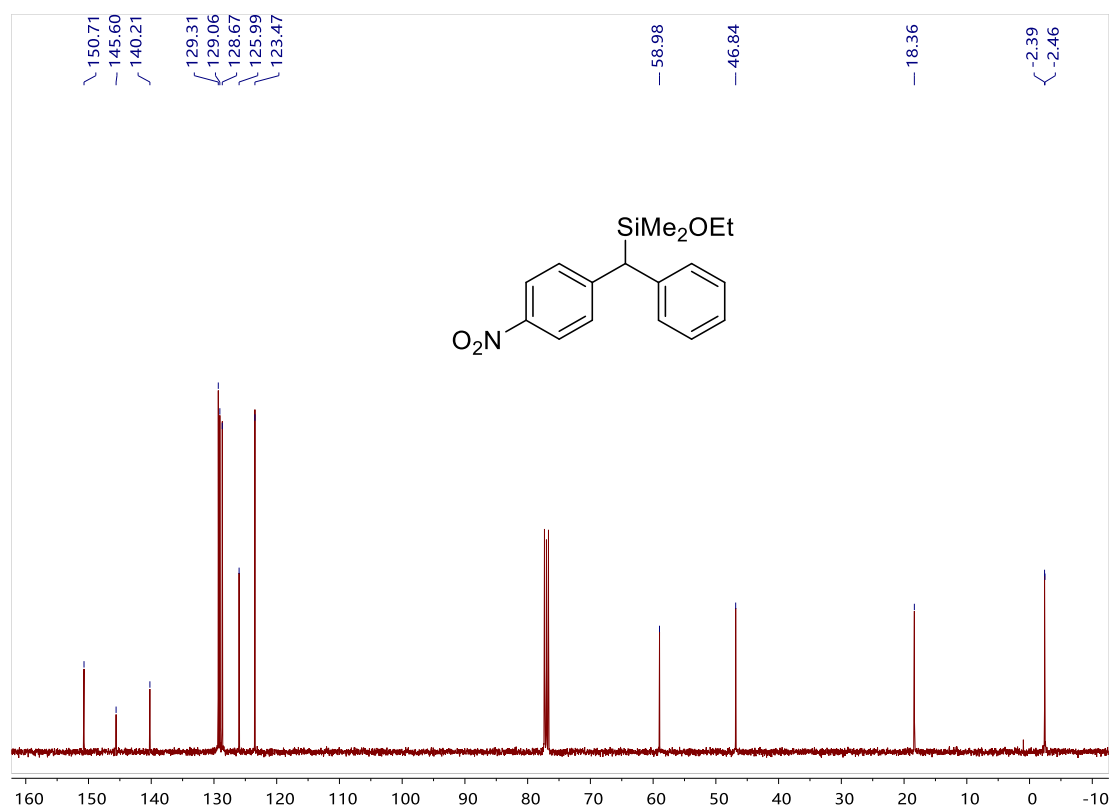

**(-)-dimethyl((4-nitrophenyl)(phenyl)methyl)silanol (P44)**

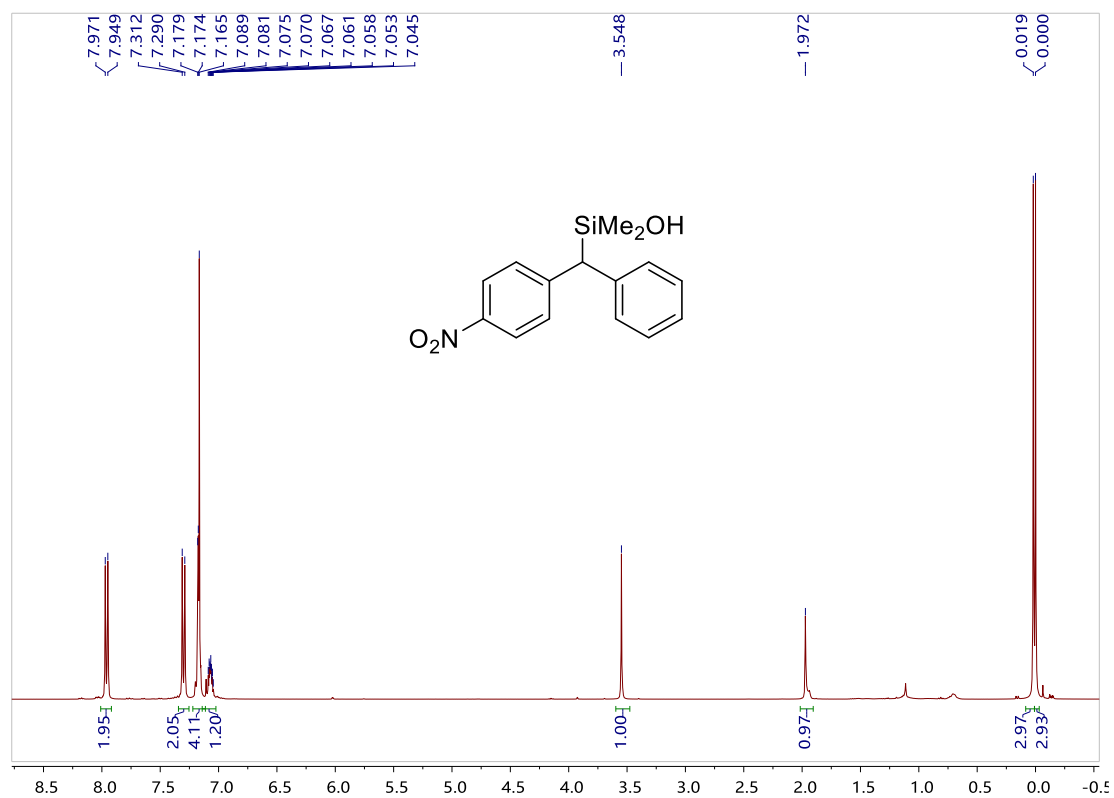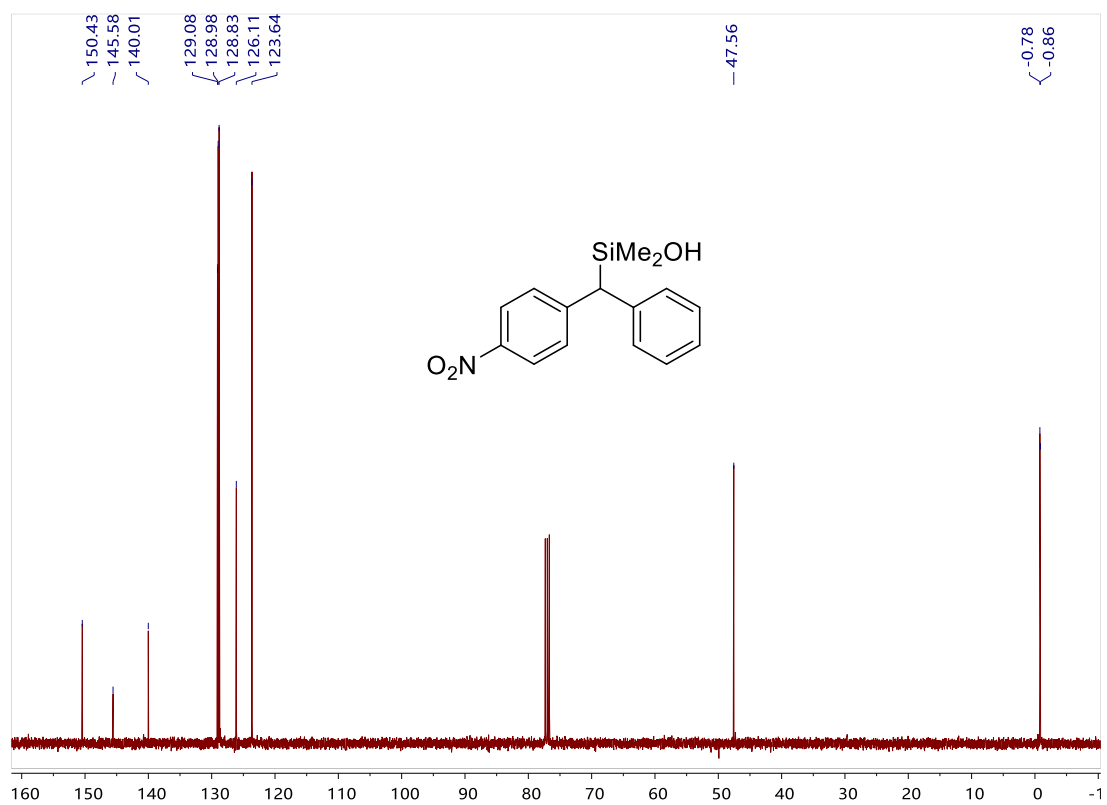

**(-)-triethyl((4-nitrophenyl)(phenyl)methyl)silane (P45)**

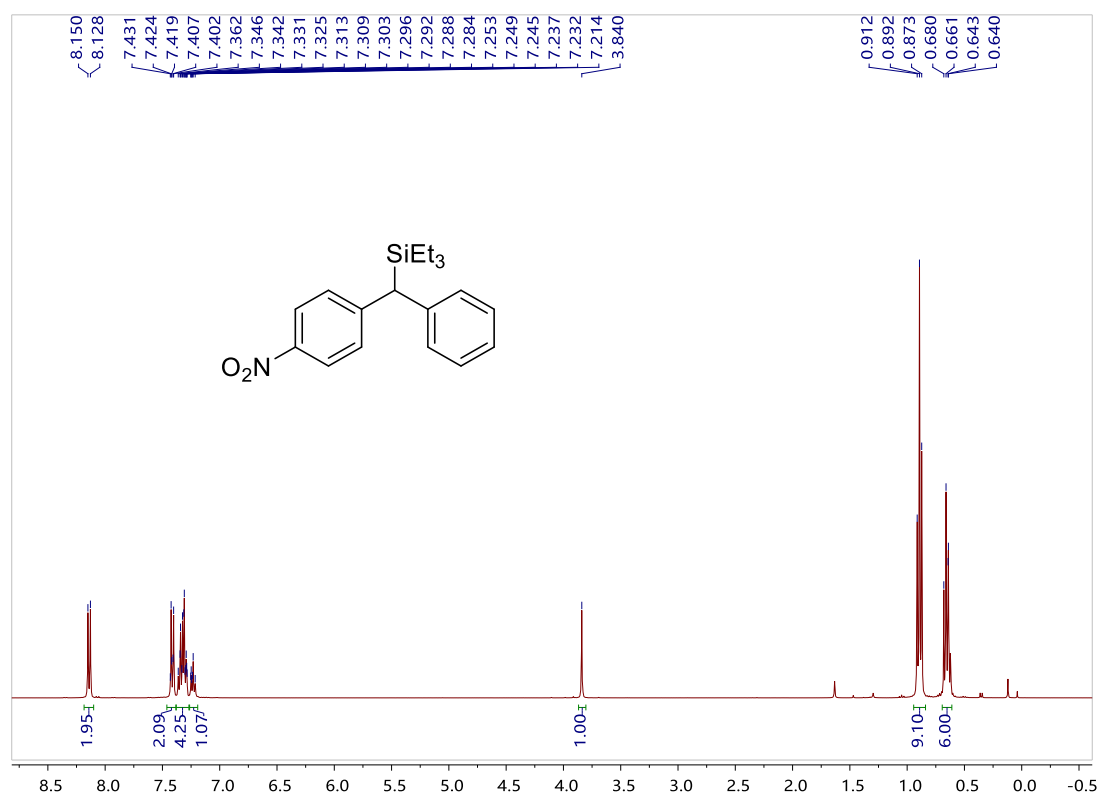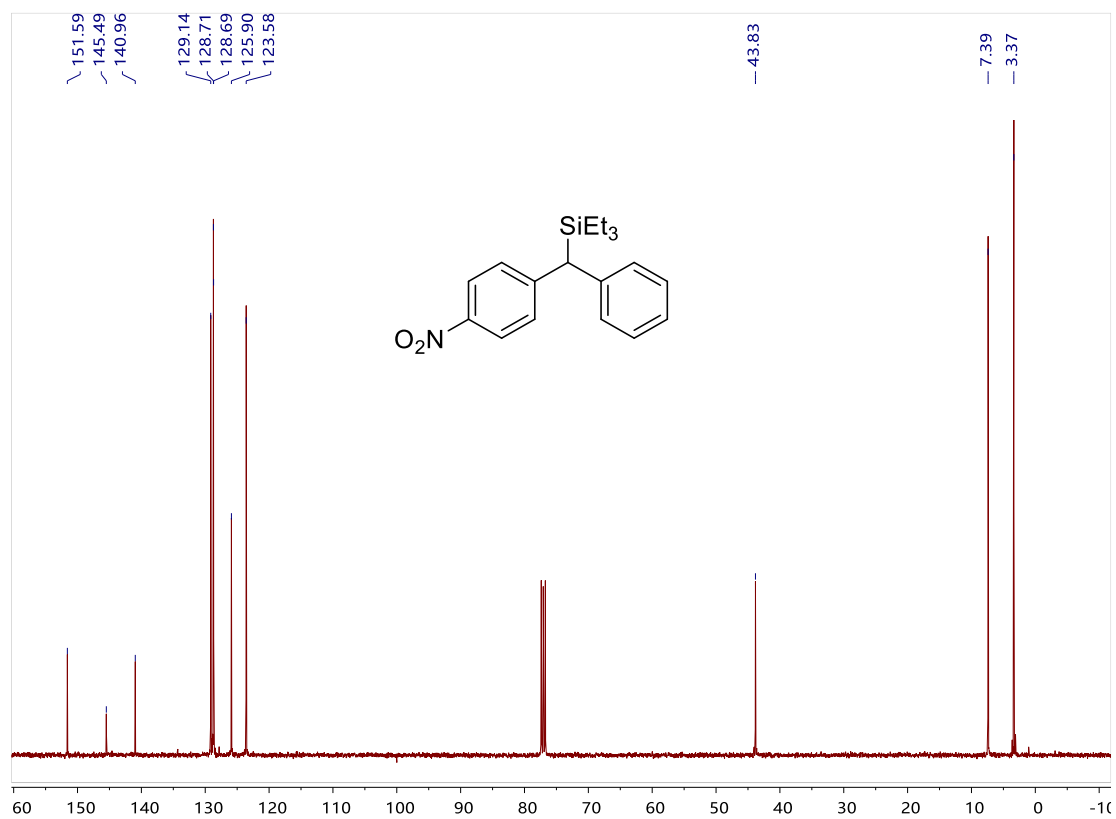

**(-)-methyl((4-nitrophenyl)(phenyl)methyl)diphenylsilane (P46)**

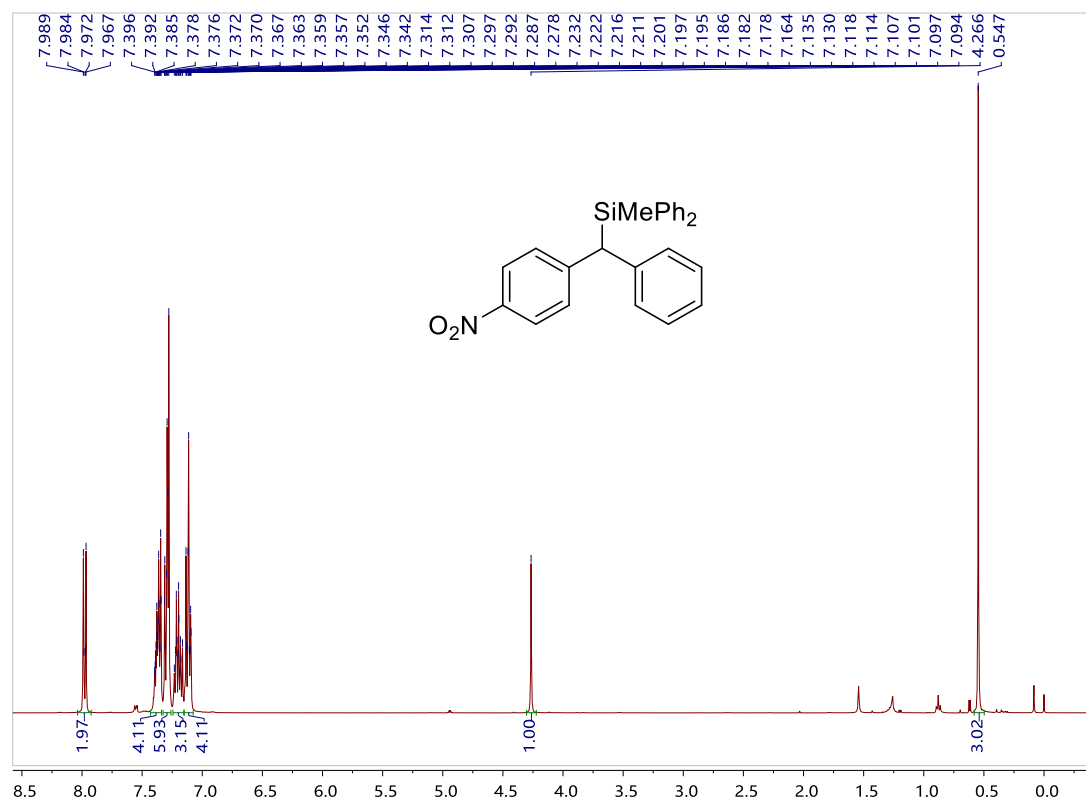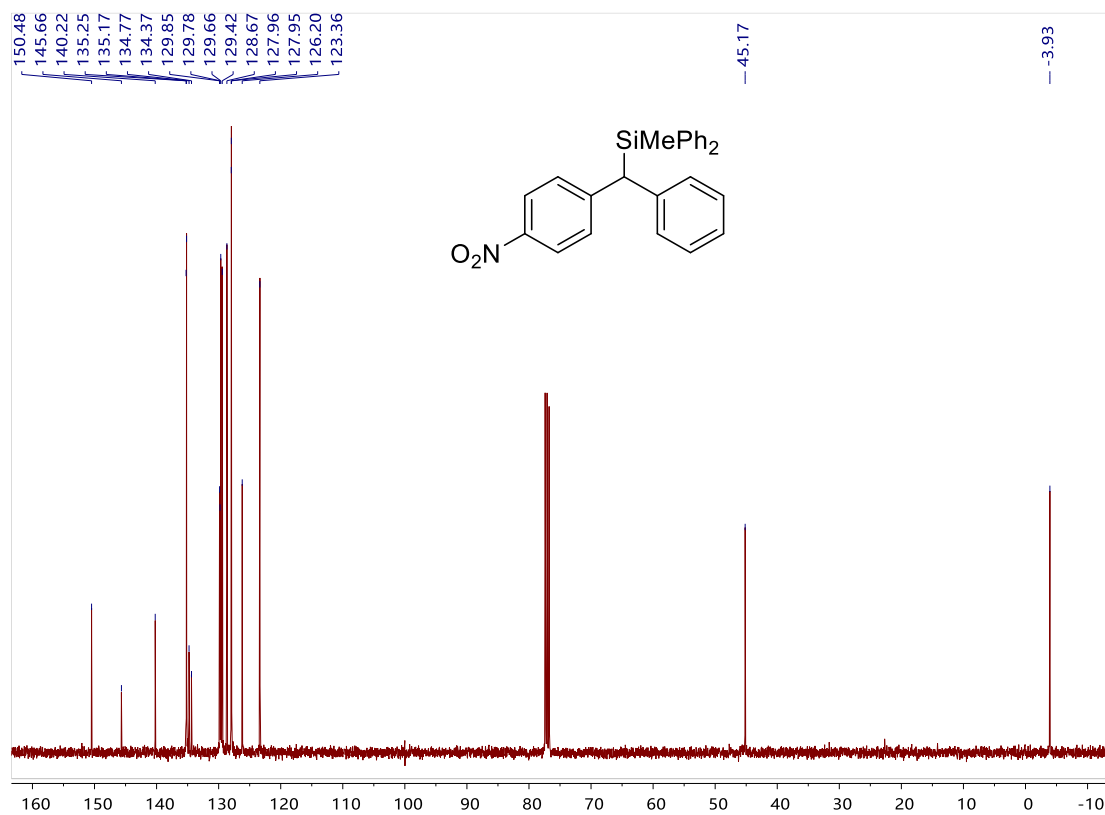

**(S)-dimethyl((4-nitrophenyl)(phenyl)methyl)(phenylethynyl)silane (P47)**

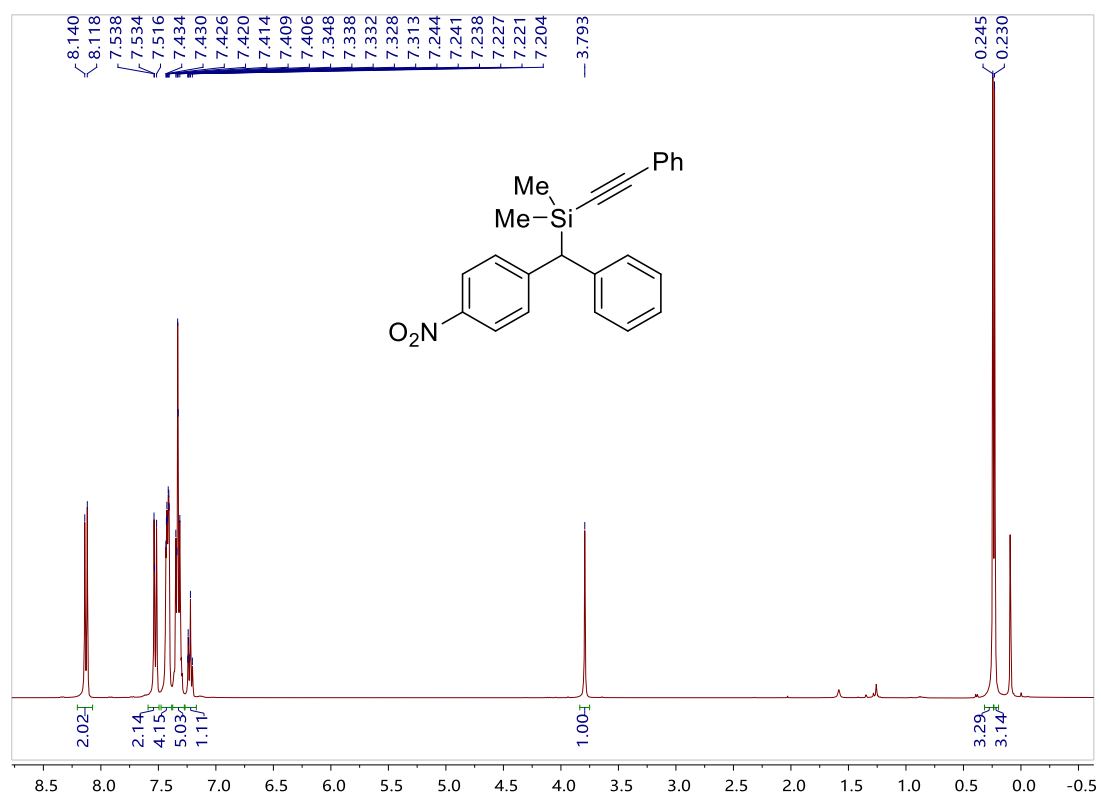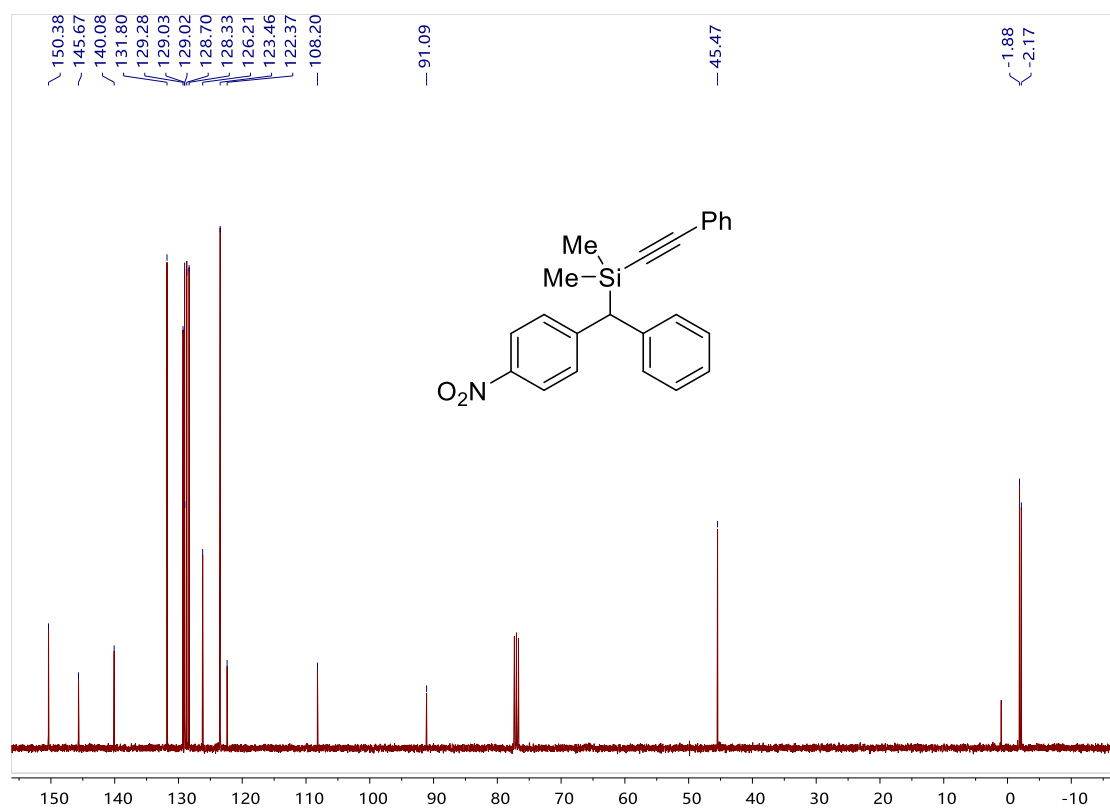

**(-)-(3-chloropropyl)dimethyl((4-nitrophenyl)(phenyl)methyl)silane (P48)**

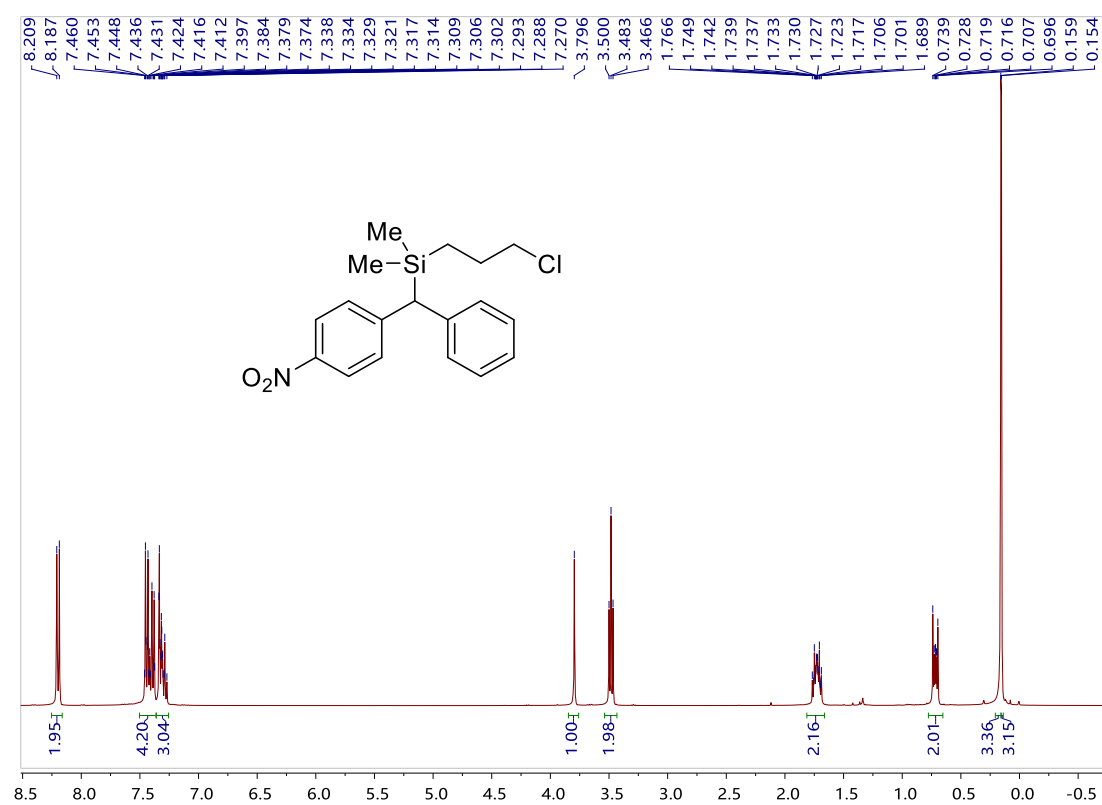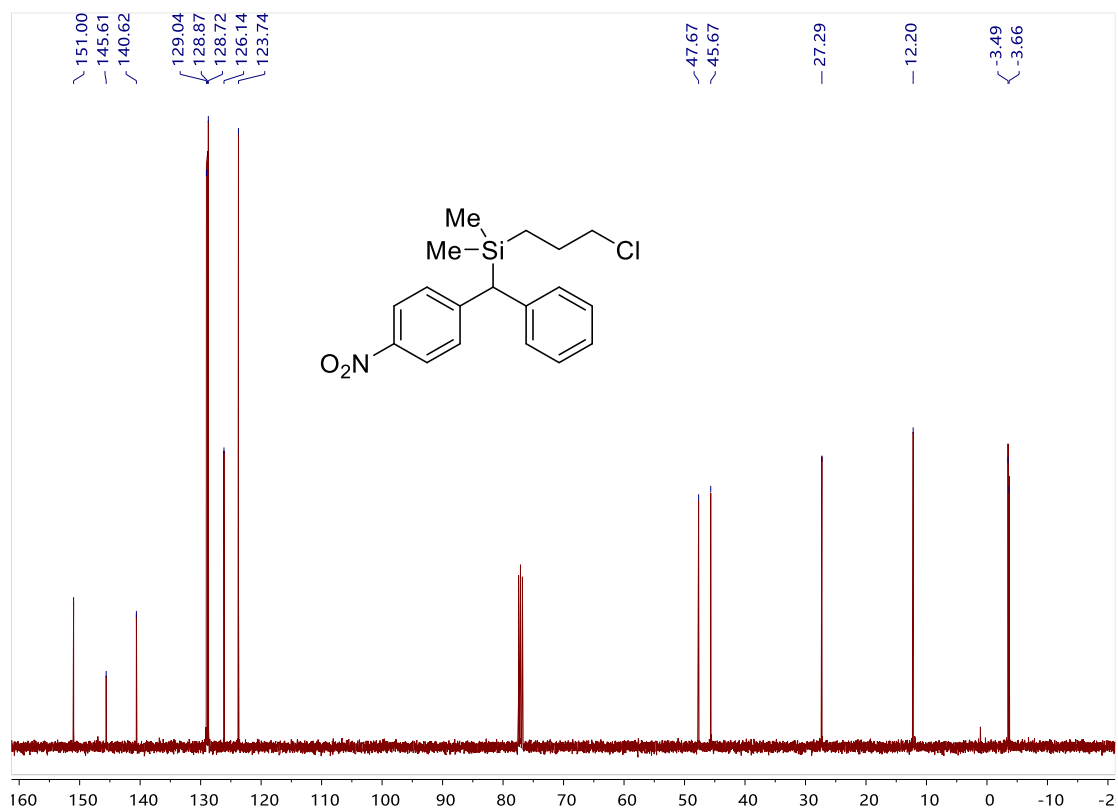



**(-)-5-(dimethyl((4-nitrophenyl)(phenyl)methyl)silyl)-1-methyl-1H-indole (P49)**

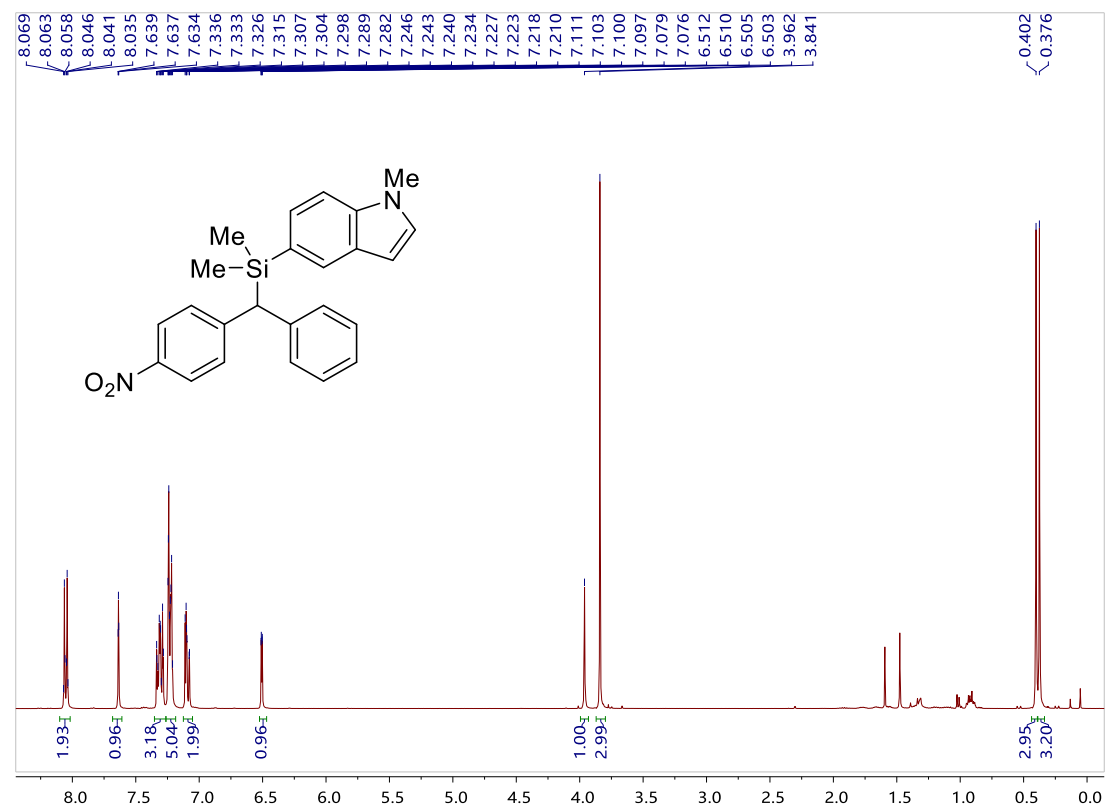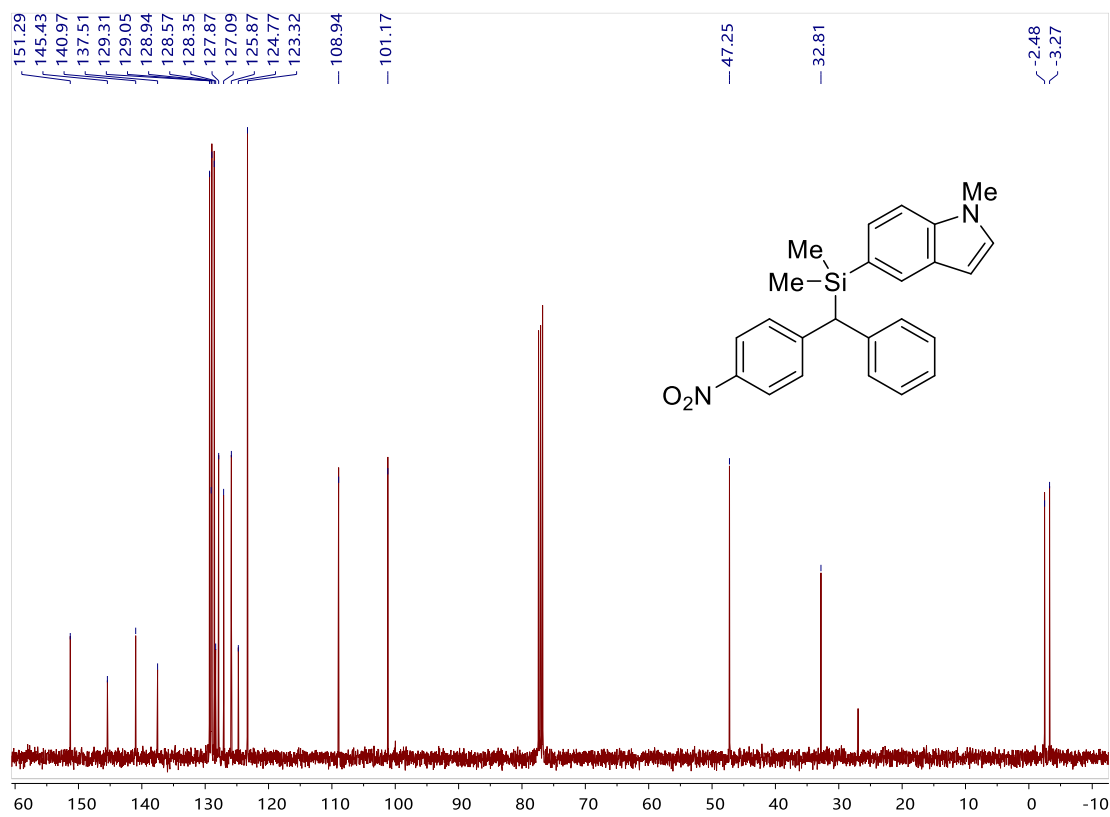

# 11 HPLC charts

## (-)-dimethyl((4-nitrophenyl)(phenyl)methyl)(phenyl)silane (P1)

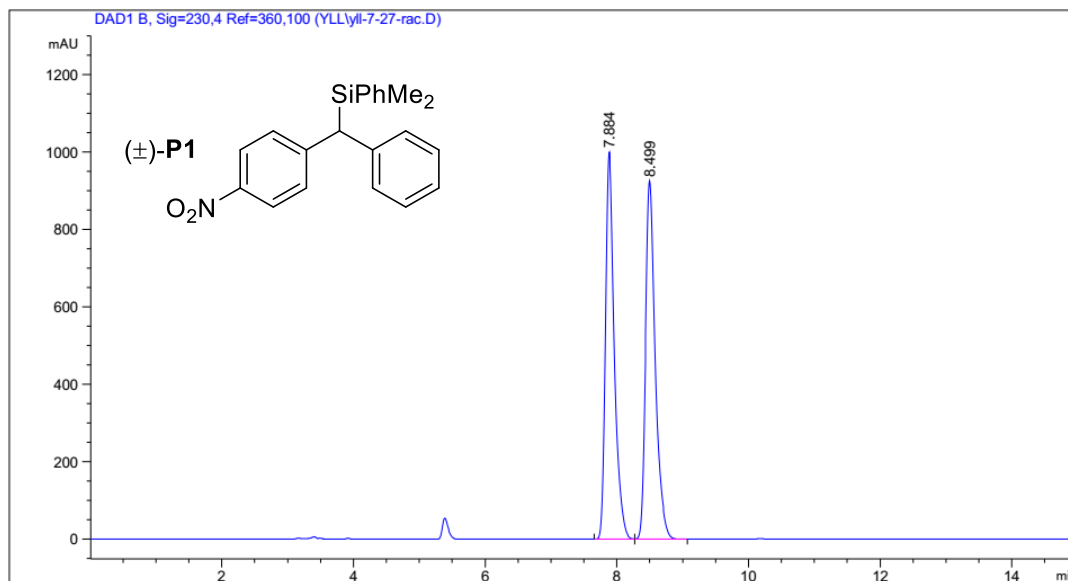

| Peak # | RetTime [min] | Type | Width [min] | Area [mAU*s] | Height [mAU] | Area %  |
|--------|---------------|------|-------------|--------------|--------------|---------|
| 1      | 7.884         | BB   | 0.1415      | 9391.26465   | 1000.48071   | 49.8194 |
| 2      | 8.499         | BB   | 0.1534      | 9459.35254   | 924.58362    | 50.1806 |

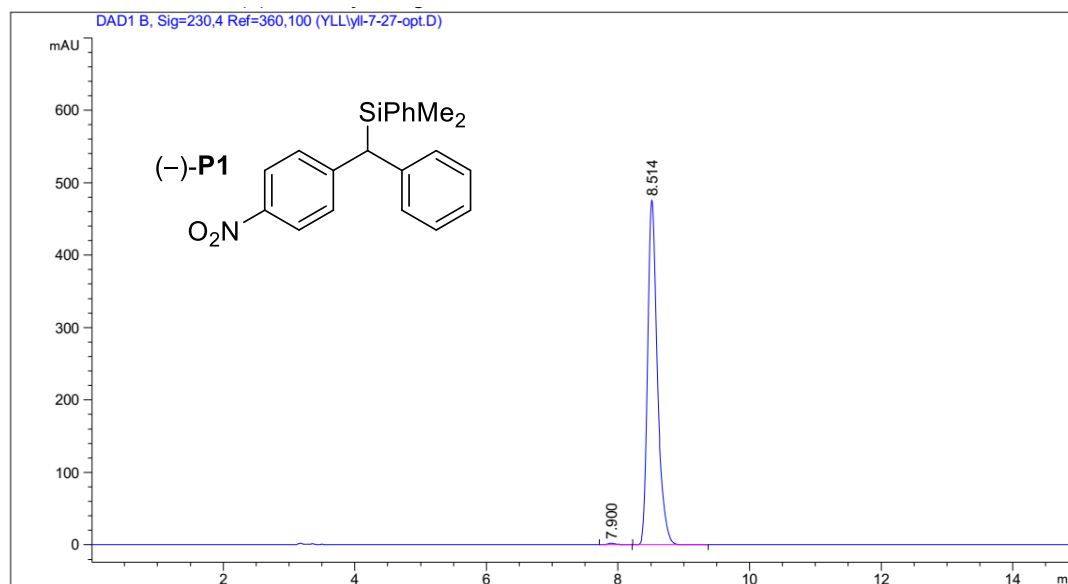

| Peak # | RetTime [min] | Type | Width [min] | Area [mAU*s] | Height [mAU] | Area %  |
|--------|---------------|------|-------------|--------------|--------------|---------|
| 1      | 7.900         | BB   | 0.1368      | 17.17072     | 1.87579      | 0.3543  |
| 2      | 8.514         | BB   | 0.1525      | 4829.15332   | 475.51886    | 99.6457 |

**(±)-4-((dimethyl(phenyl)silyl)(phenyl)methyl)benzonitrile (P2)**

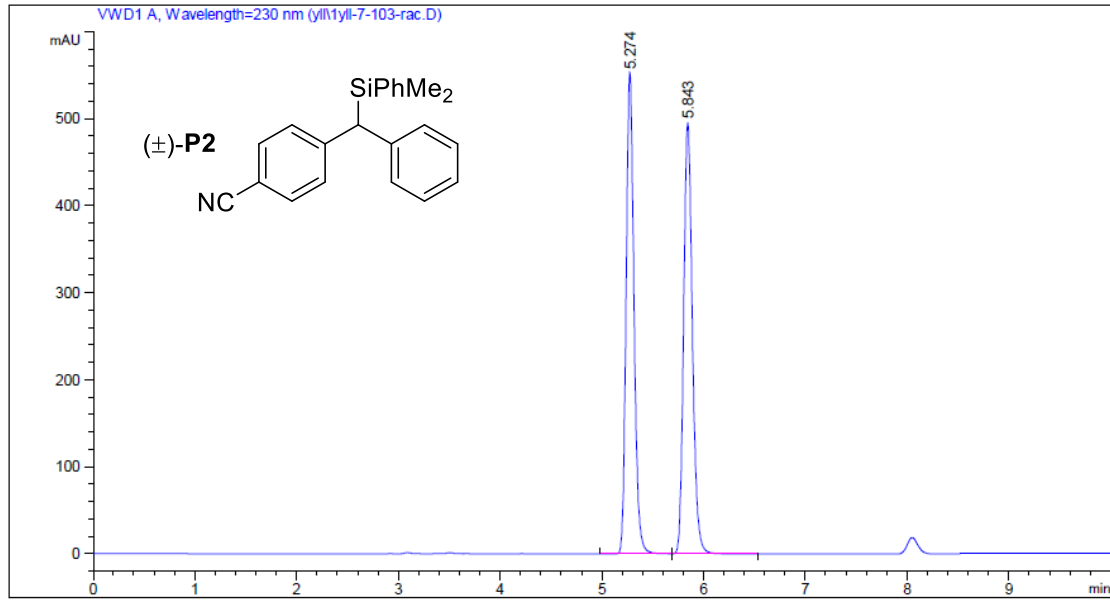

| Peak # | RetTime [min] | Type | Width [min] | Area [mAU*s] | Height [mAU] | Area %  |
|--------|---------------|------|-------------|--------------|--------------|---------|
| 1      | 5.274         | BB   | 0.0824      | 2962.58374   | 554.17719    | 50.0190 |
| 2      | 5.843         | BB   | 0.0916      | 2960.33765   | 496.05014    | 49.9810 |

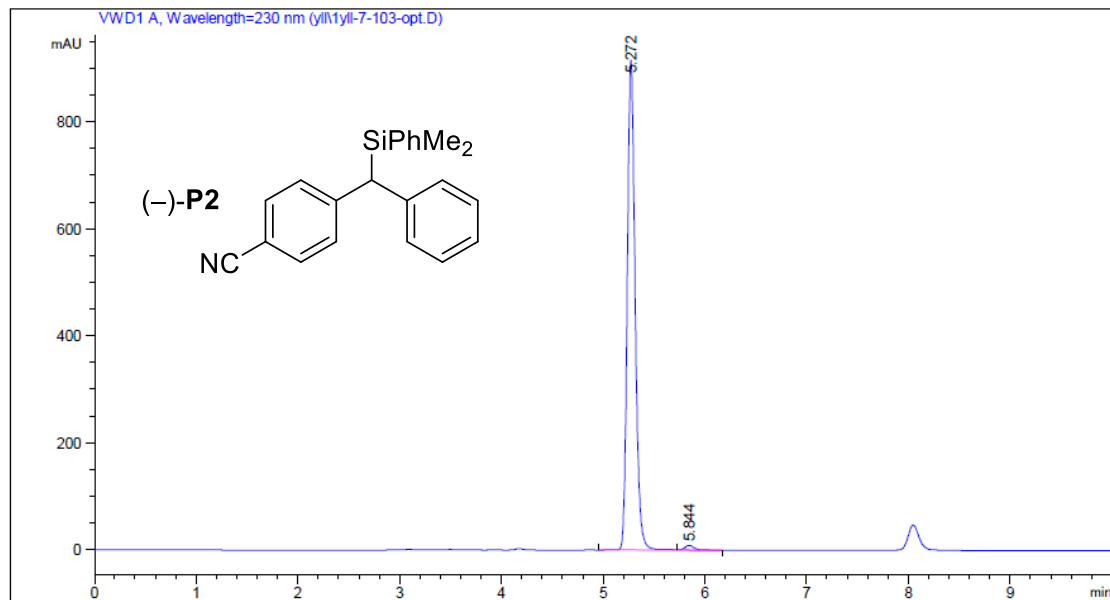

| Peak # | RetTime [min] | Type | Width [min] | Area [mAU*s] | Height [mAU] | Area %  |
|--------|---------------|------|-------------|--------------|--------------|---------|
| 1      | 5.272         | BV R | 0.0824      | 4903.74463   | 916.12579    | 98.9345 |
| 2      | 5.844         | VB E | 0.0938      | 52.81038     | 8.58474      | 1.0655  |

### (S)-phenyl(4-(trifluoromethyl)phenyl)methanol (3ol)

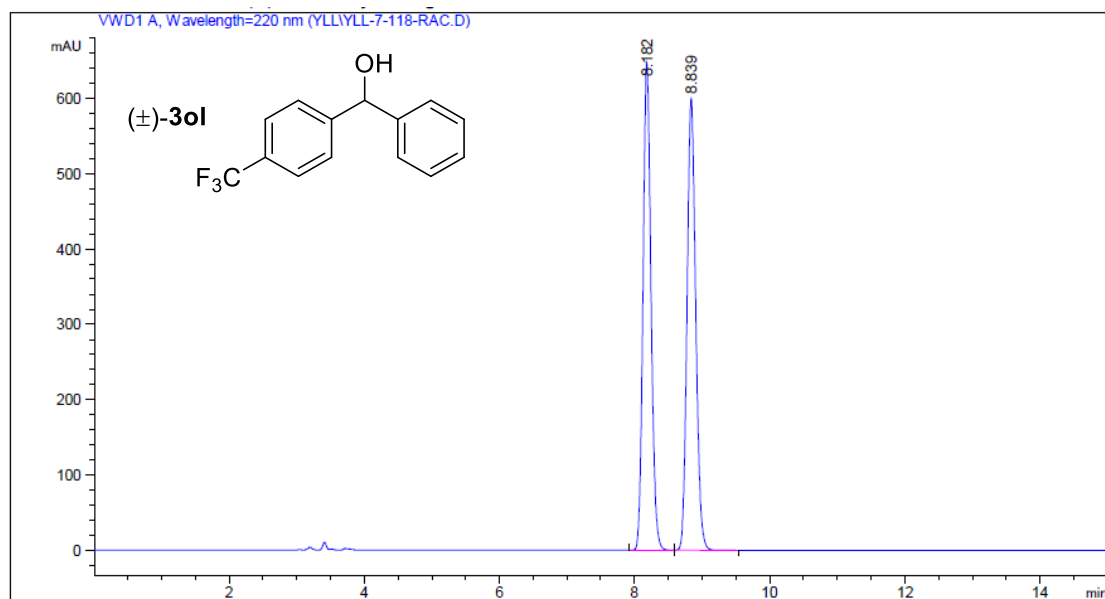

| Peak # | RetTime [min] | Type | Width [min] | Area [mAU*s] | Height [mAU] | Area %  |
|--------|---------------|------|-------------|--------------|--------------|---------|
| 1      | 8.182         | BB   | 0.1269      | 5324.54932   | 647.81824    | 49.8895 |
| 2      | 8.839         | BB   | 0.1368      | 5348.13574   | 601.20770    | 50.1105 |

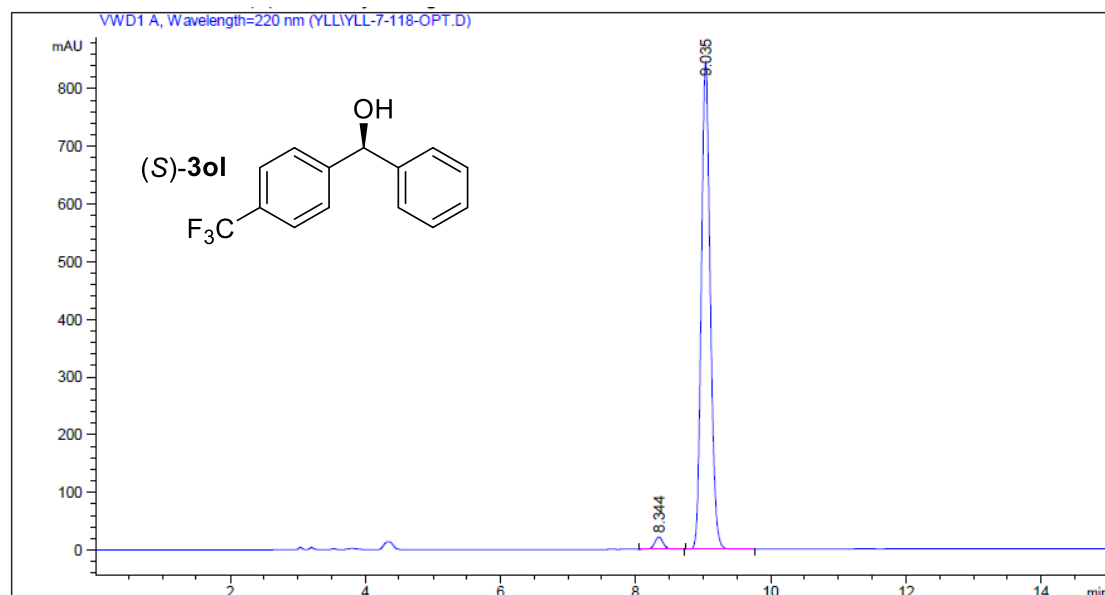

| Peak # | RetTime [min] | Type | Width [min] | Area [mAU*s] | Height [mAU] | Area %  |
|--------|---------------|------|-------------|--------------|--------------|---------|
| 1      | 8.344         | VB   | 0.1329      | 187.76241    | 21.49597     | 2.3596  |
| 2      | 9.035         | BB   | 0.1423      | 7769.53711   | 844.38702    | 97.6404 |

**(+)-phenyl(4-((trifluoromethyl)thio)phenyl)methanol (4ol)**

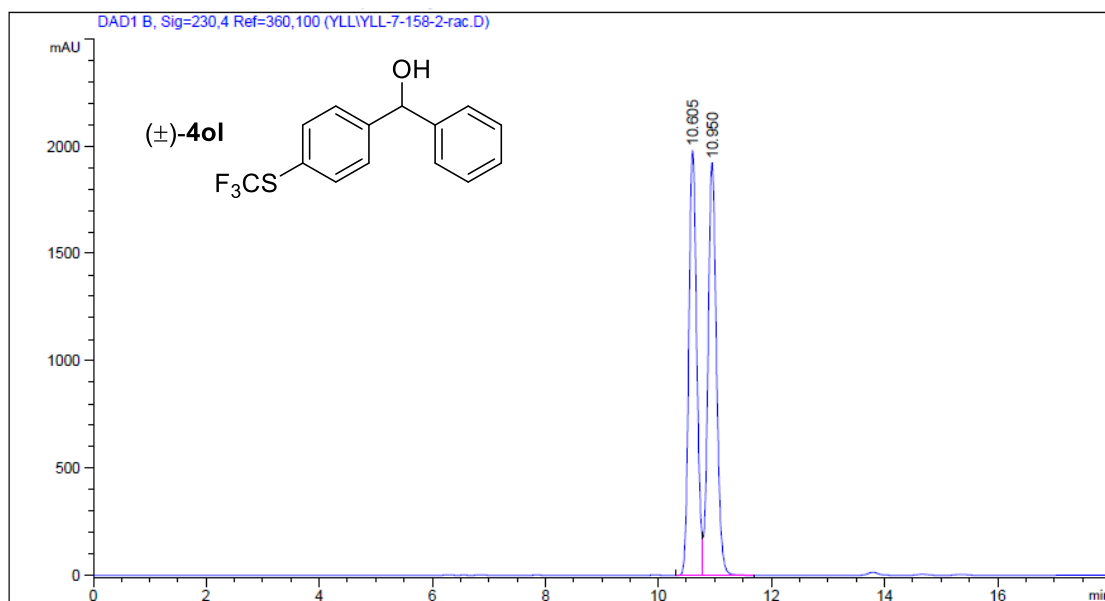

| Peak # | RetTime [min] | Type | Width [min] | Area [mAU*s] | Height [mAU] | Area %  |
|--------|---------------|------|-------------|--------------|--------------|---------|
| 1      | 10.605        | BV   | 0.1523      | 1.94086e4    | 1981.42847   | 49.3397 |
| 2      | 10.950        | VB   | 0.1609      | 1.99280e4    | 1923.48218   | 50.6603 |

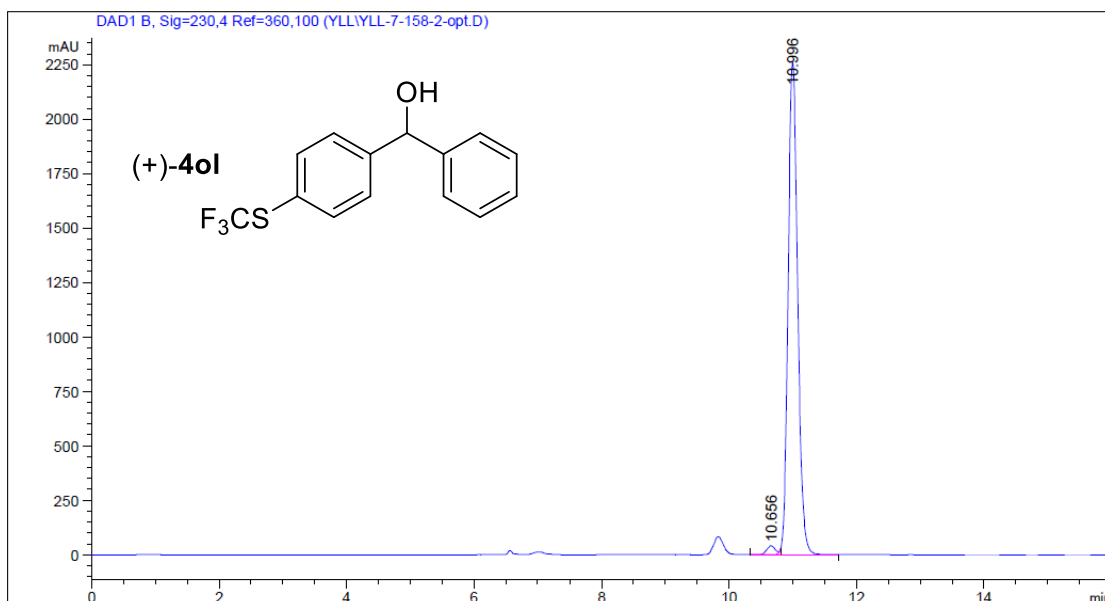

| Peak # | RetTime [min] | Type | Width [min] | Area [mAU*s] | Height [mAU] | Area %  |
|--------|---------------|------|-------------|--------------|--------------|---------|
| 1      | 10.656        | BV E | 0.1433      | 377.80048    | 41.05914     | 1.5817  |
| 2      | 10.996        | VB R | 0.1615      | 2.35073e4    | 2257.79102   | 98.4183 |

**(+)-phenyl(4-(trifluoromethoxy)phenyl)methanol (5ol)**

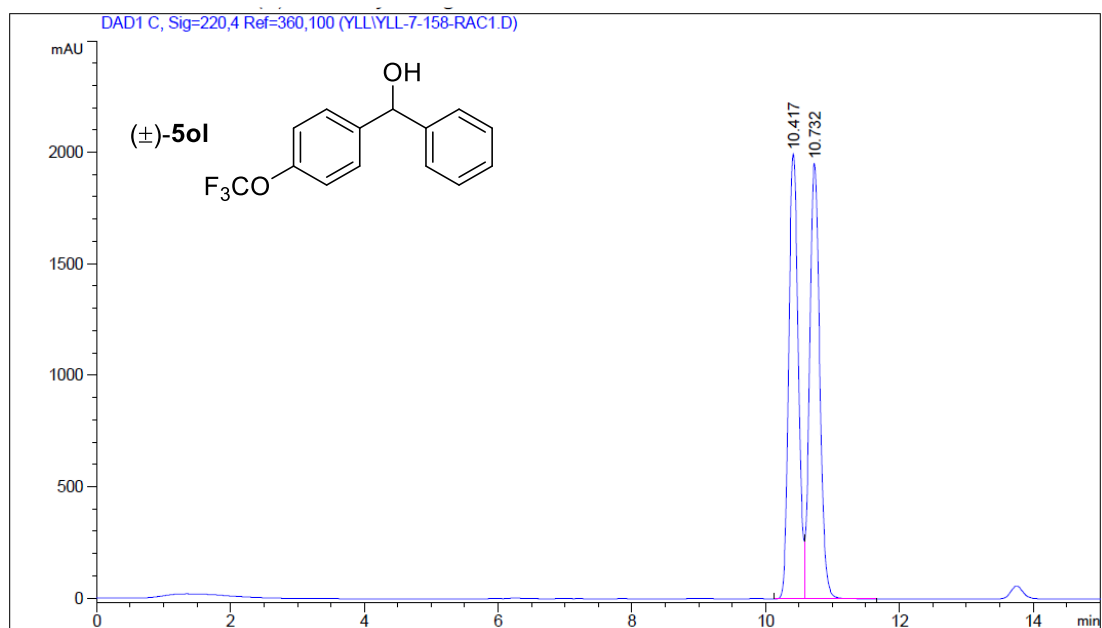

| Peak # | RetTime [min] | Type | Width [min] | Area [mAU*s] | Height [mAU] | Area %  |
|--------|---------------|------|-------------|--------------|--------------|---------|
| 1      | 10.417        | BV   | 0.1555      | 1.97606e4    | 1995.17517   | 48.9958 |
| 2      | 10.732        | VB   | 0.1630      | 2.05706e4    | 1951.90979   | 51.0042 |

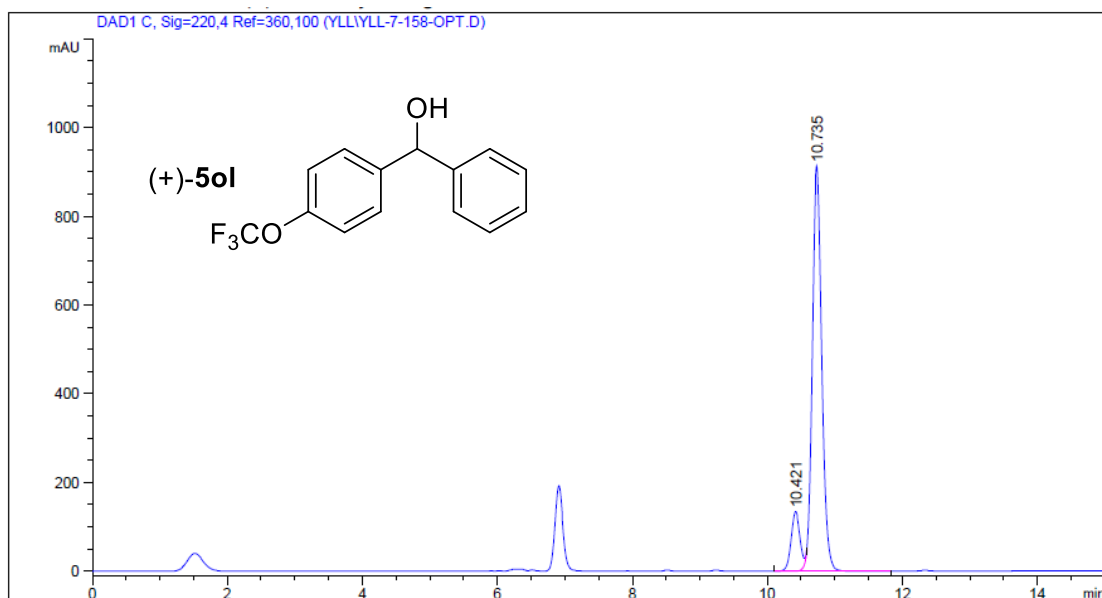

| Peak # | RetTime [min] | Type | Width [min] | Area [mAU*s] | Height [mAU] | Area %  |
|--------|---------------|------|-------------|--------------|--------------|---------|
| 1      | 10.421        | BV E | 0.1421      | 1221.75281   | 134.36794    | 11.9457 |
| 2      | 10.735        | VB R | 0.1530      | 9005.83691   | 913.92816    | 88.0543 |

**(+)-((4-chlorophenyl)(phenyl)methyl)dimethyl(phenyl)silane (P6)**

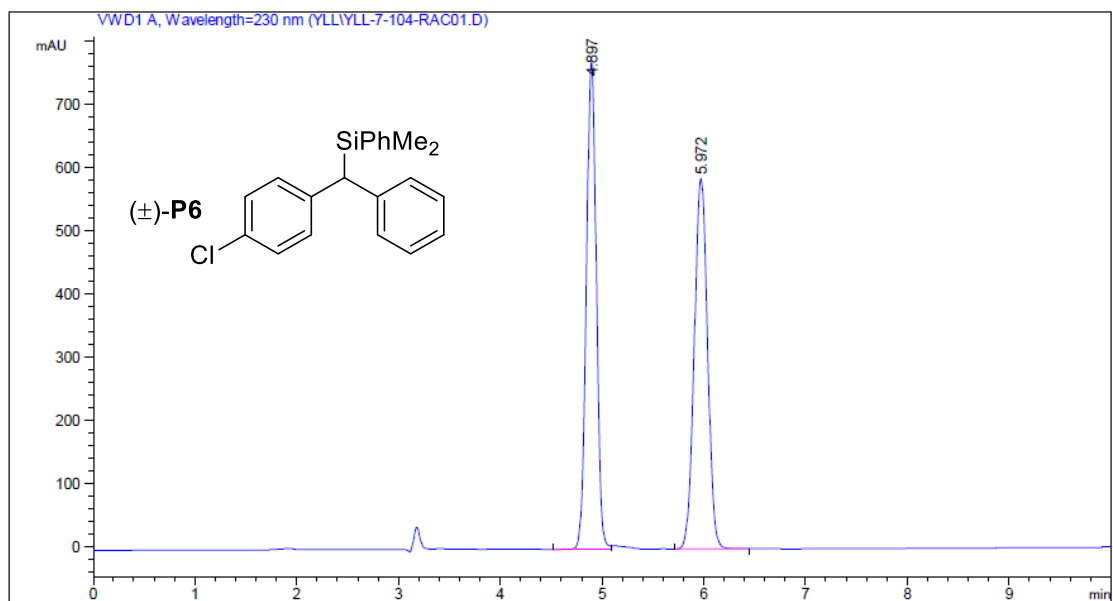

| Peak # | RetTime [min] | Type | Width [min] | Area mAU*s | Height [mAU] | Area %  |
|--------|---------------|------|-------------|------------|--------------|---------|
| 1      | 4.897         | BV   | 0.1074      | 5259.89600 | 769.83411    | 49.8150 |
| 2      | 5.972         | BB   | 0.1406      | 5298.95996 | 585.14197    | 50.1850 |

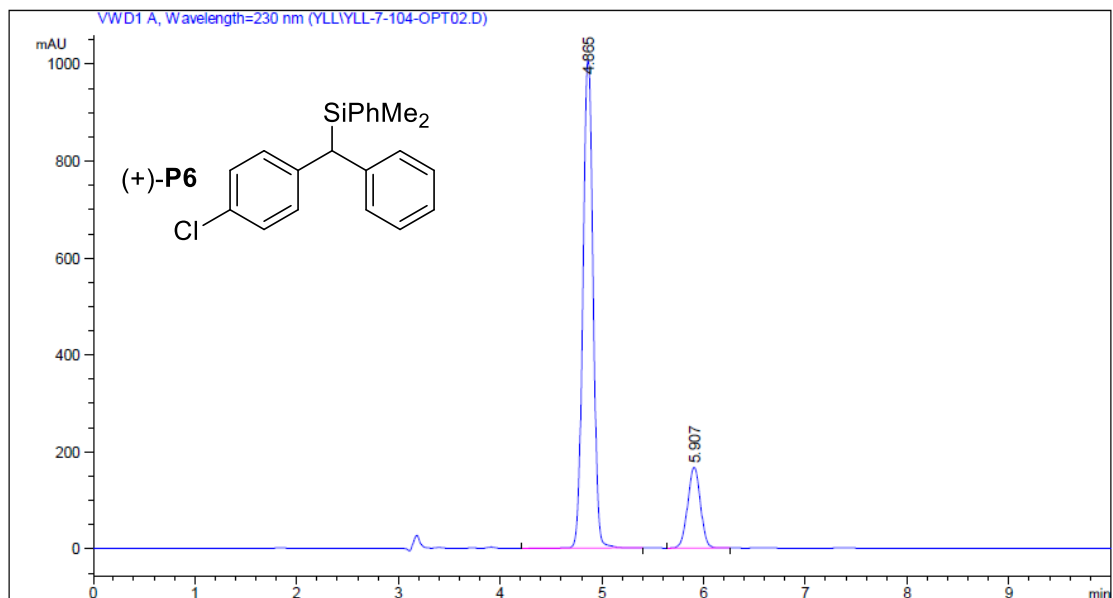

| Peak # | RetTime [min] | Type | Width [min] | Area mAU*s | Height [mAU] | Area %  |
|--------|---------------|------|-------------|------------|--------------|---------|
| 1      | 4.865         | BB   | 0.1099      | 6973.50684 | 1006.67804   | 82.7506 |
| 2      | 5.907         | BB   | 0.1354      | 1453.63513 | 166.44370    | 17.2494 |

**(+)-(4-bromophenyl)(phenyl)methyl)dimethyl(phenyl)silane(P7)**

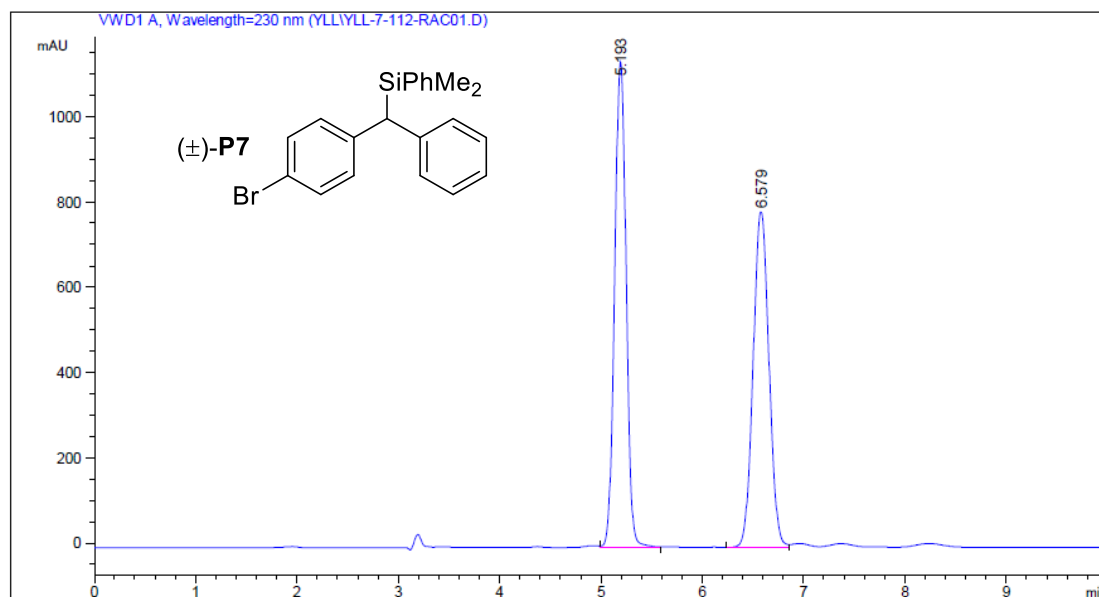

| Peak # | RetTime [min] | Type | Width [min] | Area mAU *s | Height [mAU] | Area %  |
|--------|---------------|------|-------------|-------------|--------------|---------|
| 1      | 5.193         | VV   | 0.1256      | 8985.88184  | 1137.94080   | 51.3349 |
| 2      | 6.579         | BV   | 0.1700      | 8518.55469  | 786.77460    | 48.6651 |

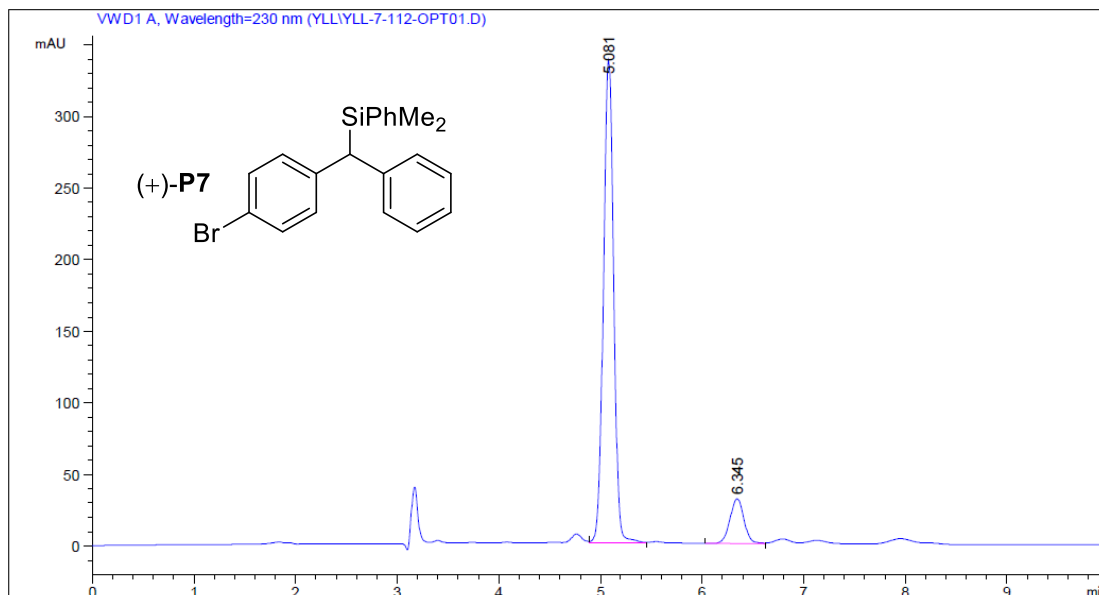

| Peak # | RetTime [min] | Type | Width [min] | Area mAU *s | Height [mAU] | Area %  |
|--------|---------------|------|-------------|-------------|--------------|---------|
| 1      | 5.081         | VV   | 0.1091      | 2355.06641  | 337.25253    | 88.7117 |
| 2      | 6.345         | BV   | 0.1483      | 299.67465   | 31.23787     | 11.2883 |



**(+)-((4-iodophenyl)(phenyl)methyl)dimethyl(phenyl)silane(P8)**

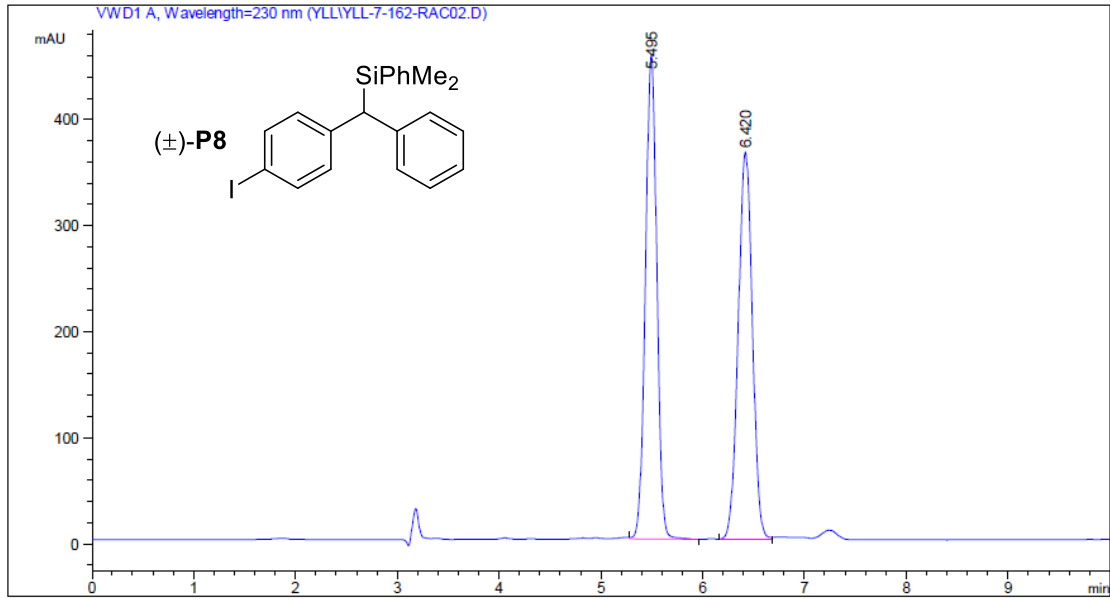

| Peak # | RetTime [min] | Type | Width [min] | Area mAU *s | Height [mAU] | Area %  |
|--------|---------------|------|-------------|-------------|--------------|---------|
| 1      | 5.495         | VB   | 0.1215      | 3555.15918  | 456.12347    | 50.0768 |
| 2      | 6.420         | BV   | 0.1526      | 3544.25317  | 364.98331    | 49.9232 |

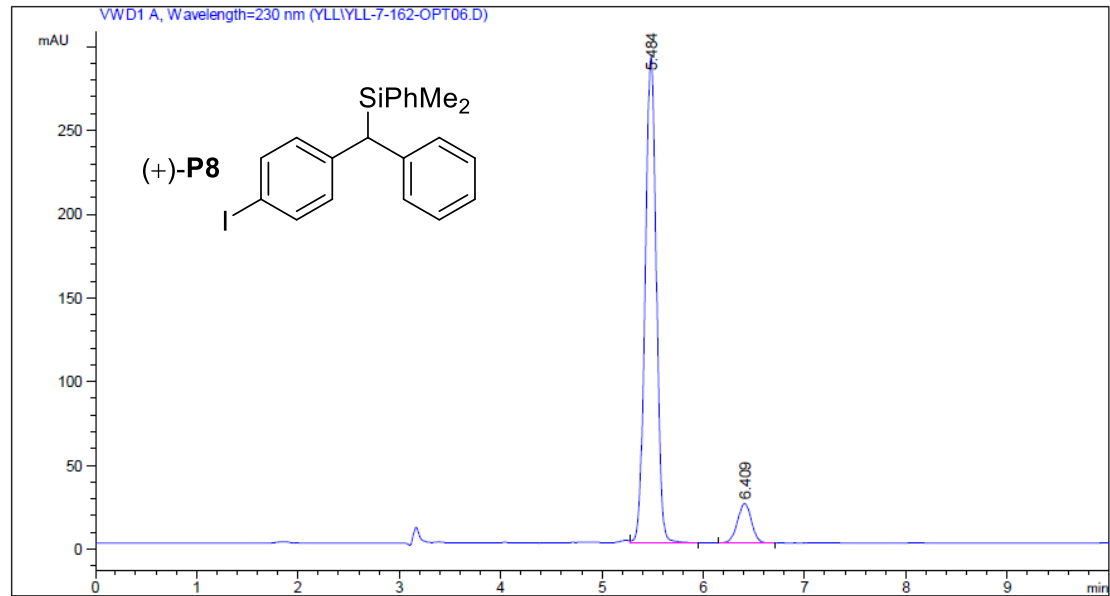

| Peak # | RetTime [min] | Type | Width [min] | Area mAU *s | Height [mAU] | Area %  |
|--------|---------------|------|-------------|-------------|--------------|---------|
| 1      | 5.484         | VB   | 0.1201      | 2228.09668  | 290.34891    | 90.8103 |
| 2      | 6.409         | VB   | 0.1498      | 225.47635   | 23.49924     | 9.1897  |

**(-)-(4-fluorophenyl)(phenyl)methanol (9ol)**

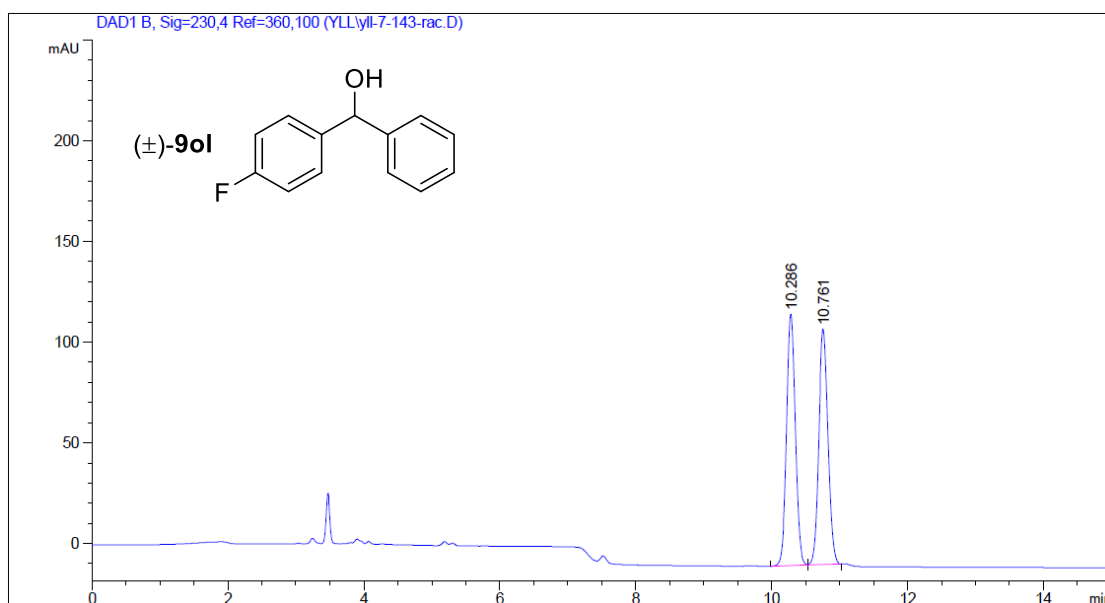

| Peak # | RetTime [min] | Type | Width [min] | Area [mAU*s] | Height [mAU] | Area %  |
|--------|---------------|------|-------------|--------------|--------------|---------|
| 1      | 10.286        | BV   | 0.1380      | 1113.85730   | 124.97284    | 50.2722 |
| 2      | 10.761        | VB   | 0.1458      | 1101.79492   | 117.02339    | 49.7278 |

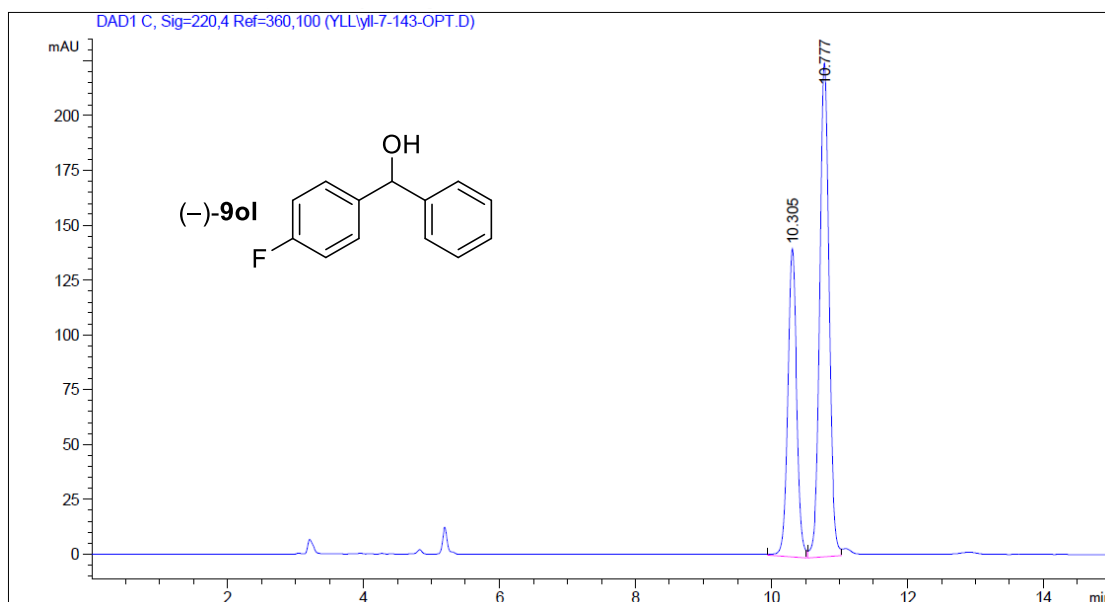

| Peak # | RetTime [min] | Type | Width [min] | Area [mAU*s] | Height [mAU] | Area %  |
|--------|---------------|------|-------------|--------------|--------------|---------|
| 1      | 10.305        | MM   | 0.1493      | 1253.72351   | 139.94191    | 37.6304 |
| 2      | 10.777        | MM   | 0.1550      | 2077.95142   | 223.37556    | 62.3696 |

**(-)-dimethyl(phenyl)(phenyl(p-tolyl)methyl)silane(P10)**

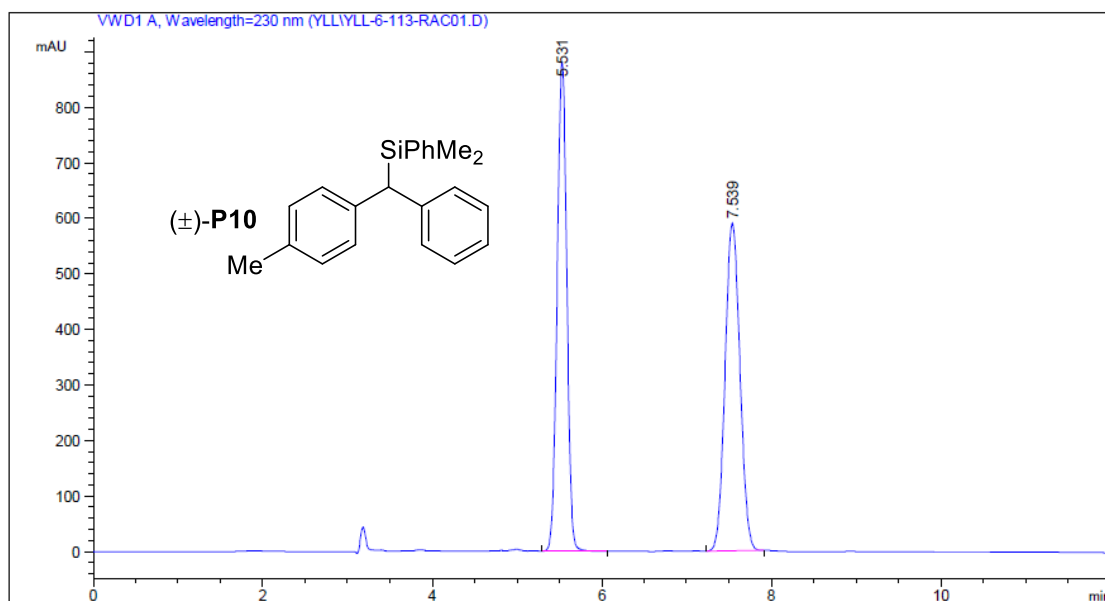

| Peak # | RetTime [min] | Type | Width [min] | Area mAU *s | Height [mAU] | Area %  |
|--------|---------------|------|-------------|-------------|--------------|---------|
| 1      | 5.531         | BB   | 0.1245      | 6970.30371  | 879.49323    | 49.2414 |
| 2      | 7.539         | BB   | 0.1915      | 7185.07373  | 590.46796    | 50.7586 |

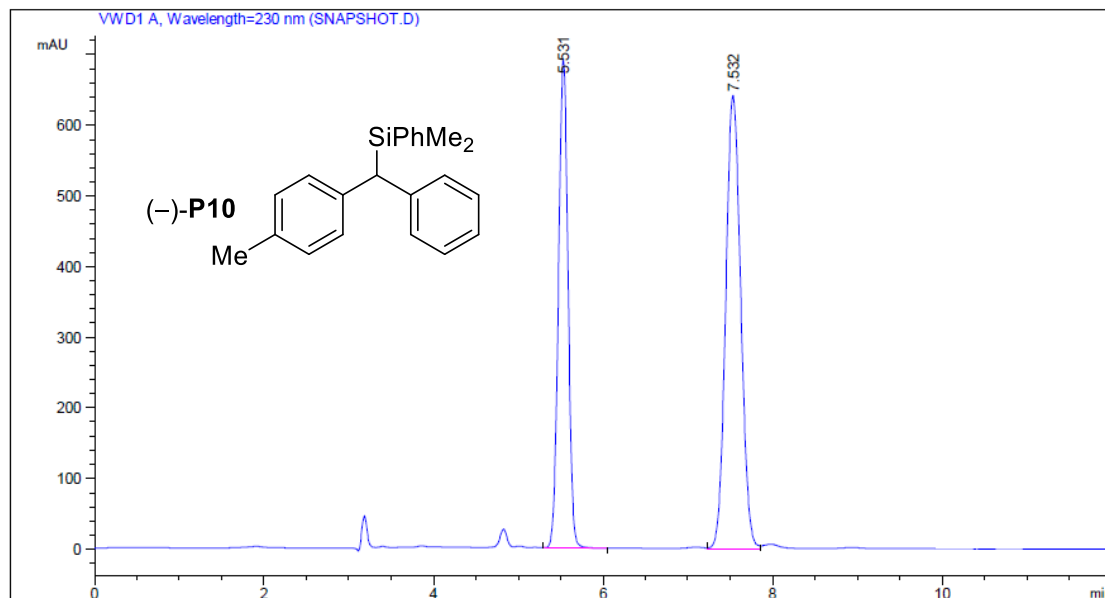

| Peak # | RetTime [min] | Type | Width [min] | Area mAU *s | Height [mAU] | Area %  |
|--------|---------------|------|-------------|-------------|--------------|---------|
| 1      | 5.531         | BB   | 0.1236      | 5420.60791  | 690.65948    | 40.7653 |
| 2      | 7.532         | VV   | 0.1927      | 7876.52051  | 641.58459    | 59.2347 |

**(R)-((4-methoxyphenyl)(phenyl)methyl)dimethyl(phenyl)silane(P11)**

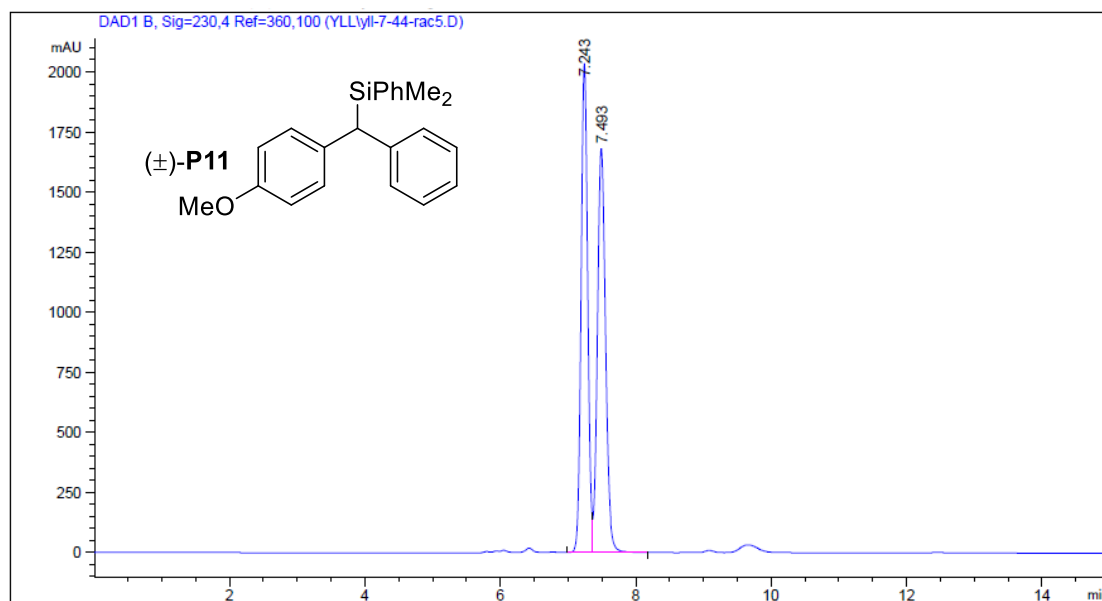

| Peak # | RetTime [min] | Type | Width [min] | Area [mAU*s] | Height [mAU] | Area %  |
|--------|---------------|------|-------------|--------------|--------------|---------|
| 1      | 7.243         | BV   | 0.1032      | 1.34772e4    | 2036.60693   | 49.3621 |
| 2      | 7.493         | VB   | 0.1278      | 1.38256e4    | 1684.16943   | 50.6379 |

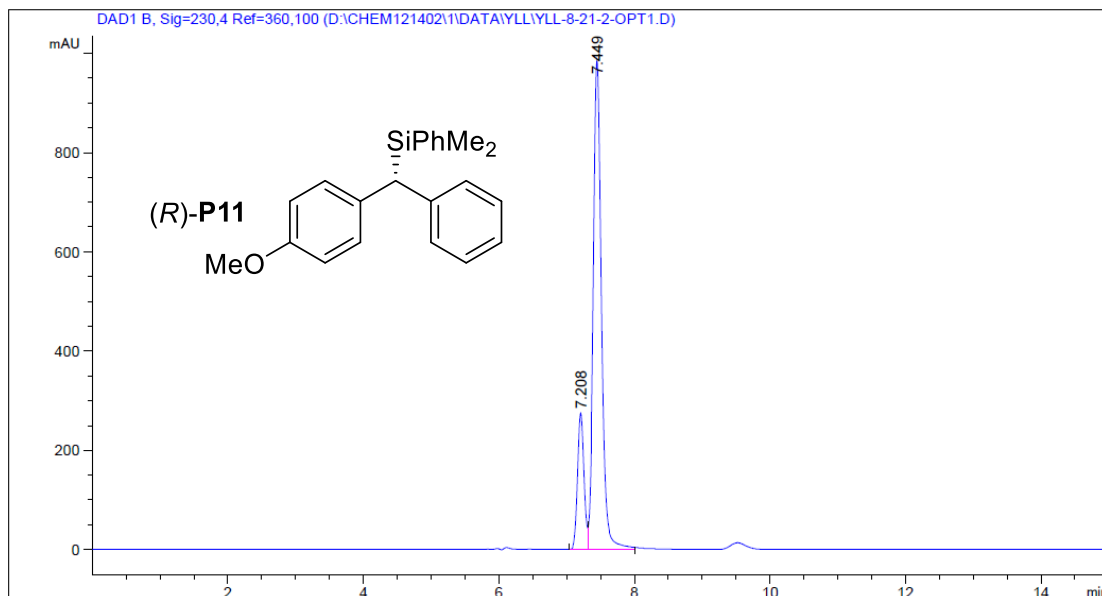

| Peak # | RetTime [min] | Type | Width [min] | Area [mAU*s] | Height [mAU] | Area %  |
|--------|---------------|------|-------------|--------------|--------------|---------|
| 1      | 7.208         | MM R | 0.1093      | 1807.13354   | 275.68298    | 18.1668 |
| 2      | 7.449         | MM R | 0.1377      | 8140.31836   | 985.46405    | 81.8332 |

### (R)-(4-methoxyphenyl)(phenyl)methanol (11ol)

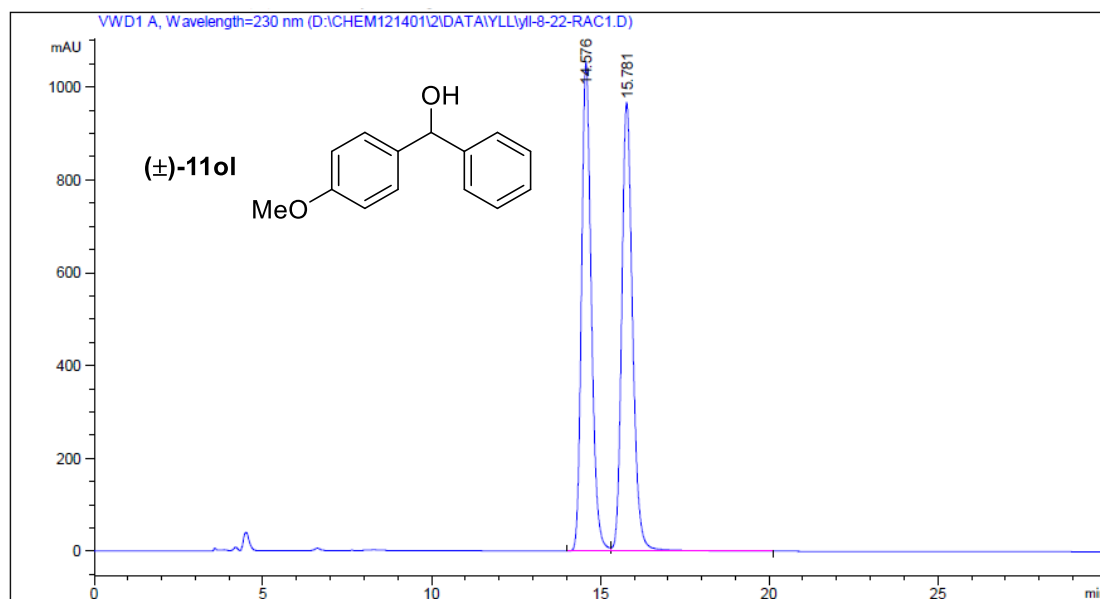

| Peak # | RetTime [min] | Type | Width [min] | Area [mAU*s] | Height [mAU] | Area %  |
|--------|---------------|------|-------------|--------------|--------------|---------|
| 1      | 14.576        | BV   | 0.3092      | 2.12109e4    | 1051.93665   | 49.4662 |
| 2      | 15.781        | VB   | 0.3425      | 2.16687e4    | 966.84375    | 50.5338 |

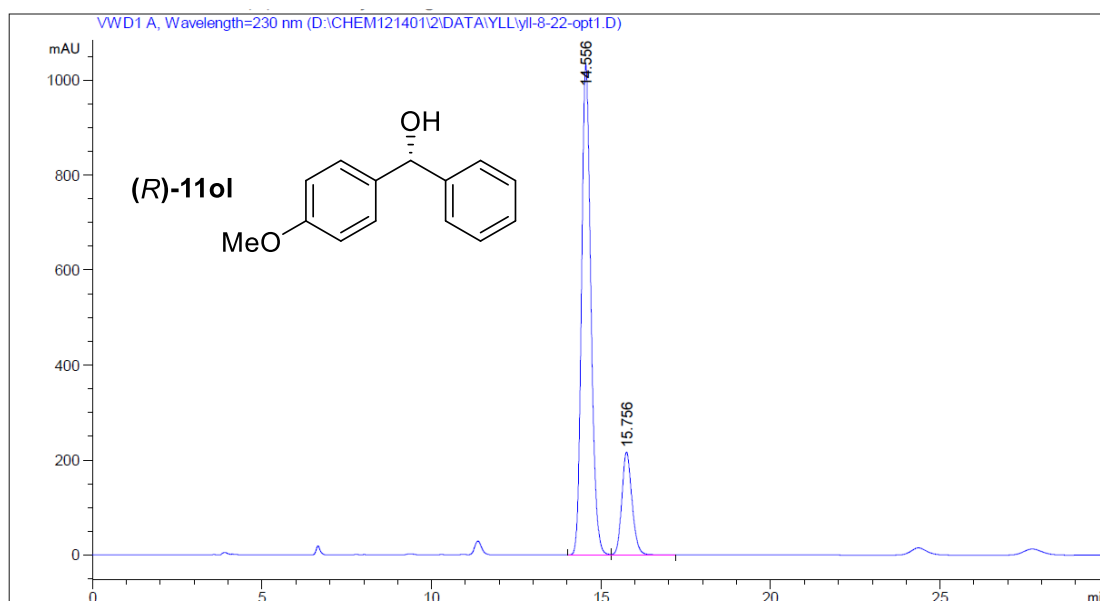

| Peak # | RetTime [min] | Type | Width [min] | Area [mAU*s] | Height [mAU] | Area %  |
|--------|---------------|------|-------------|--------------|--------------|---------|
| 1      | 14.556        | BV   | 0.2954      | 1.98531e4    | 1032.32886   | 81.3567 |
| 2      | 15.756        | VB   | 0.3218      | 4549.43555   | 216.83577    | 18.6433 |

**(-)-4-((dimethyl(phenyl)silyl)(phenyl)methyl)-*N,N*-dimethylaniline(P12)**

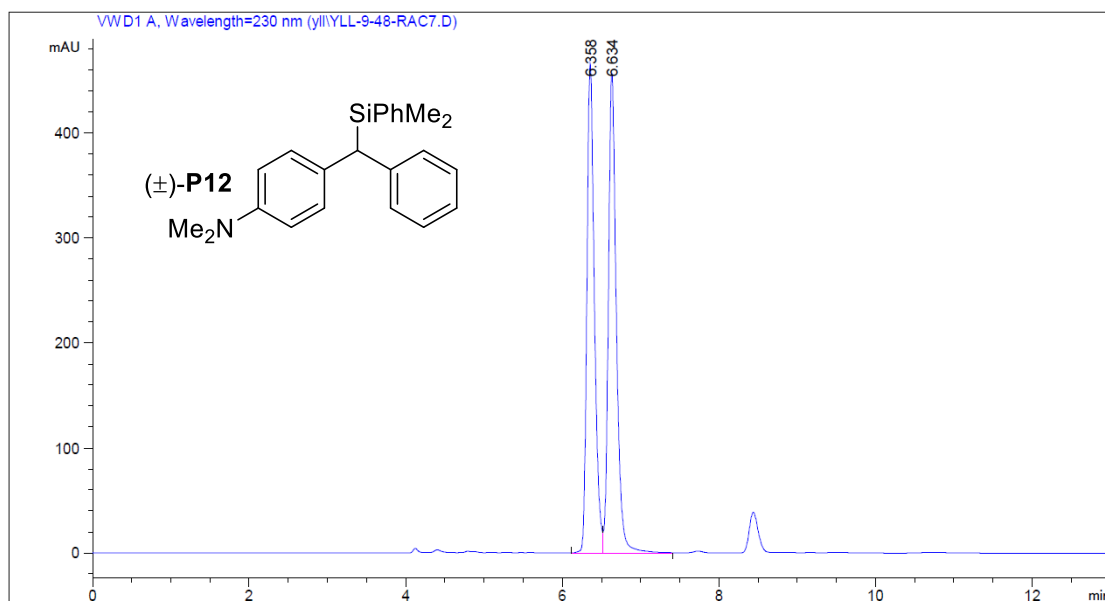

| Peak # | RetTime [min] | Type | Width [min] | Area [mAU*s] | Height [mAU] | Area %  |
|--------|---------------|------|-------------|--------------|--------------|---------|
| 1      | 6.358         | BV   | 0.1002      | 3085.69482   | 466.49731    | 48.8293 |
| 2      | 6.634         | VB   | 0.1066      | 3233.65454   | 456.96005    | 51.1707 |

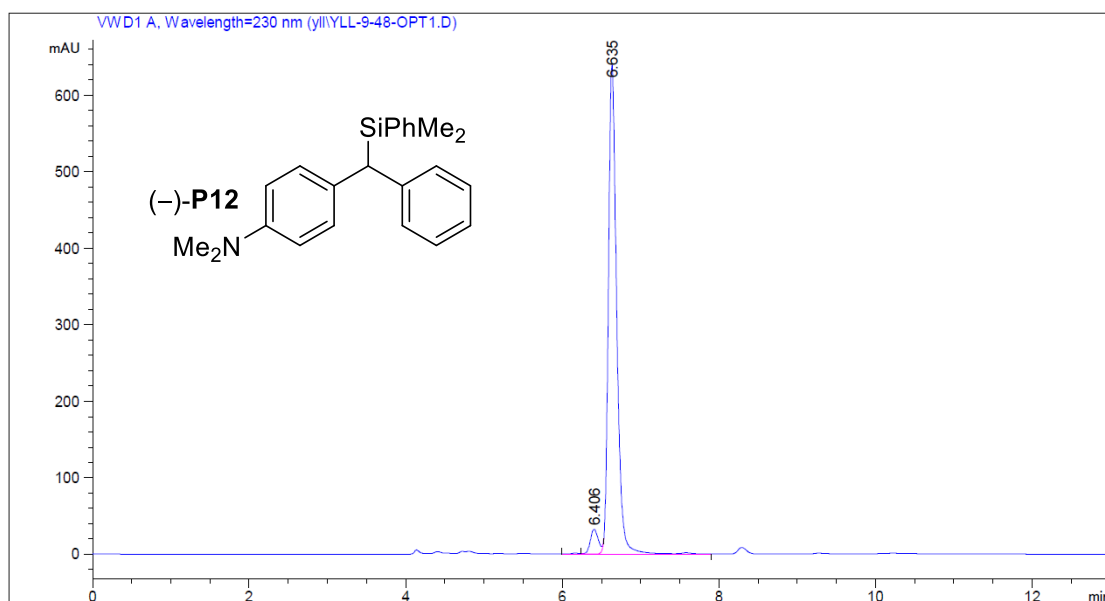

| Peak # | RetTime [min] | Type | Width [min] | Area [mAU*s] | Height [mAU] | Area %  |
|--------|---------------|------|-------------|--------------|--------------|---------|
| 1      | 6.406         | VV E | 0.1085      | 229.75182    | 32.48794     | 4.6298  |
| 2      | 6.635         | VV R | 0.1112      | 4732.71436   | 640.24054    | 95.3702 |

**(-)-4-((dimethyl(phenyl)silyl)(4-nitrophenyl)methyl)-*N,N*-dimethylaniline (P13)**

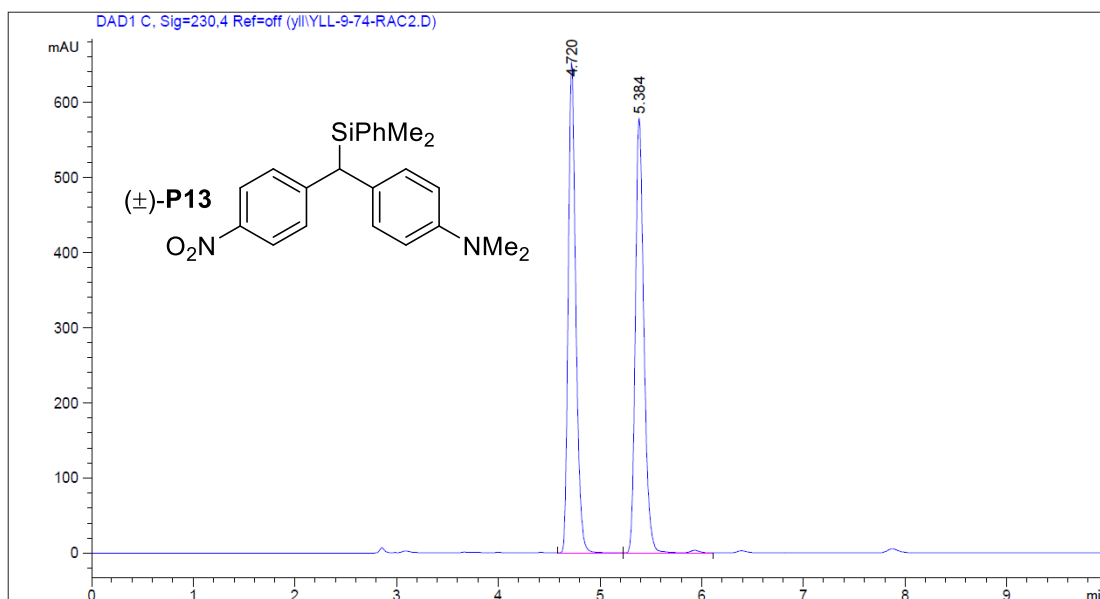

| Peak # | RetTime [min] | Type | Width [min] | Area [mAU*s] | Height [mAU] | Area %  |
|--------|---------------|------|-------------|--------------|--------------|---------|
| 1      | 4.720         | BB   | 0.0783      | 3369.67798   | 652.43787    | 49.7842 |
| 2      | 5.384         | BV R | 0.0881      | 3398.88452   | 578.78180    | 50.2158 |

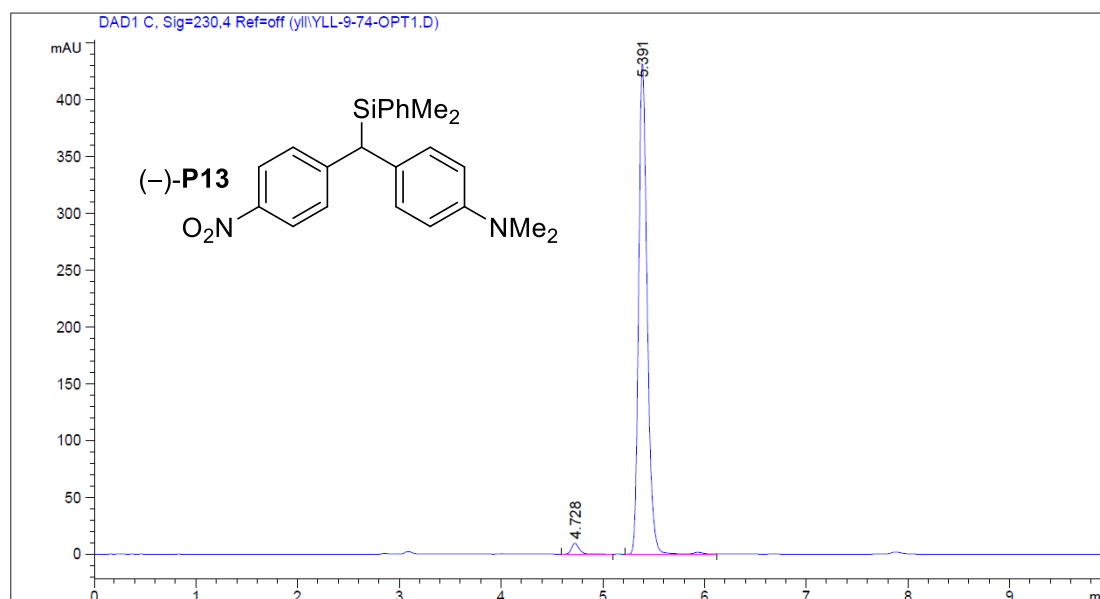

| Peak # | RetTime [min] | Type | Width [min] | Area [mAU*s] | Height [mAU] | Area %  |
|--------|---------------|------|-------------|--------------|--------------|---------|
| 1      | 4.728         | BB   | 0.0780      | 50.42667     | 9.81020      | 1.9557  |
| 2      | 5.391         | BV R | 0.0879      | 2528.08081   | 432.93674    | 98.0443 |

**(-)-((4-methoxyphenyl)(4-nitrophenyl)methyl)dimethyl(phenyl)silane (P14)**

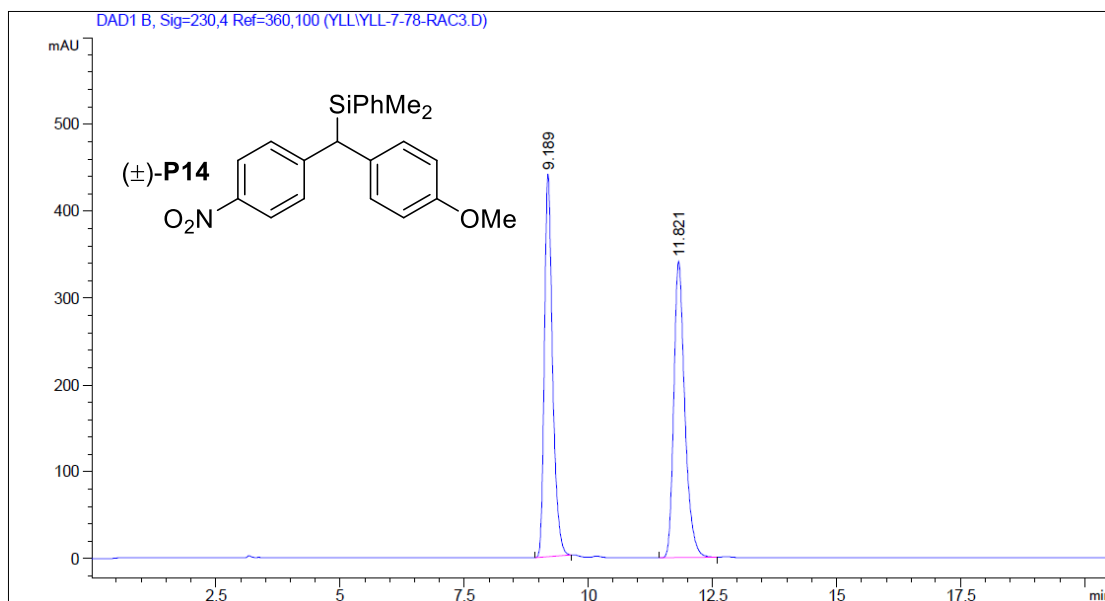

| Peak # | RetTime [min] | Type | Width [min] | Area [mAU*s] | Height [mAU] | Area %  |
|--------|---------------|------|-------------|--------------|--------------|---------|
| 1      | 9.189         | BB   | 0.1741      | 5064.55615   | 440.47961    | 48.9347 |
| 2      | 11.821        | BB   | 0.2347      | 5285.05859   | 341.13690    | 51.0653 |

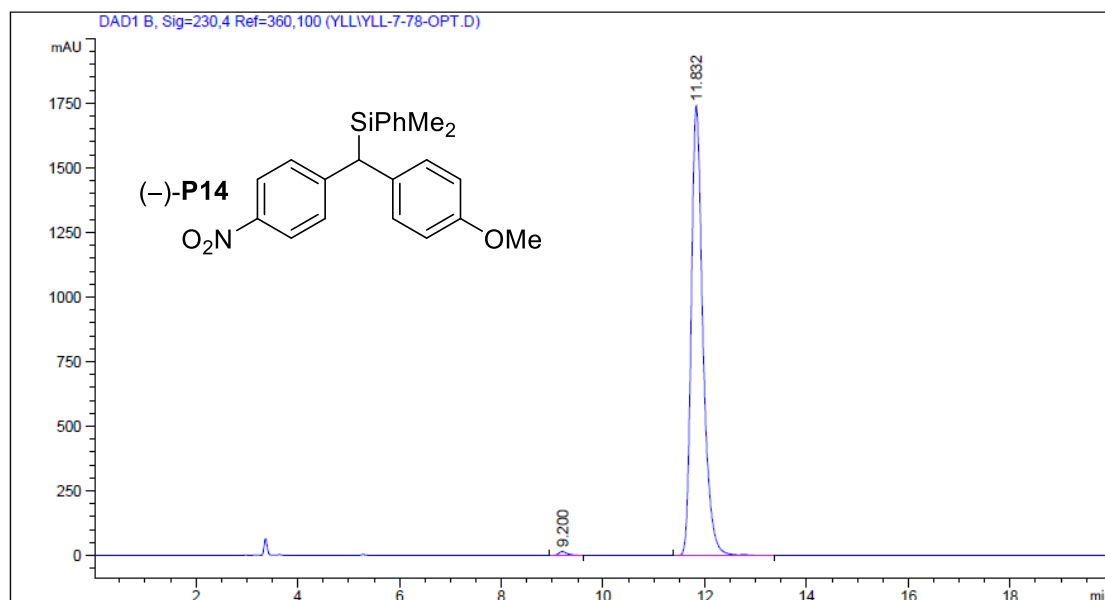

| Peak # | RetTime [min] | Type | Width [min] | Area [mAU*s] | Height [mAU] | Area %  |
|--------|---------------|------|-------------|--------------|--------------|---------|
| 1      | 9.200         | BB   | 0.1764      | 182.35788    | 15.36962     | 0.6539  |
| 2      | 11.832        | BV R | 0.2395      | 2.77069e4    | 1740.64185   | 99.3461 |



**(±)-dimethyl((4-nitrophenyl)(*p*-tolyl)methyl)(phenyl)silane (P15)**

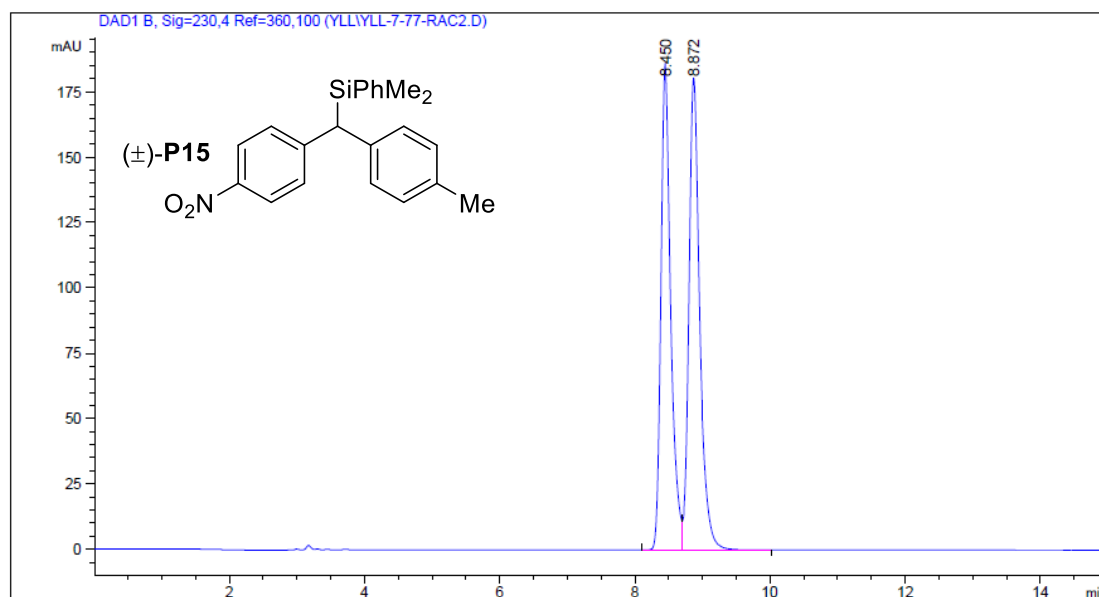

| Peak # | RetTime [min] | Type | Width [min] | Area [mAU*s] | Height [mAU] | Area %  |
|--------|---------------|------|-------------|--------------|--------------|---------|
| 1      | 8.450         | BV   | 0.1528      | 1897.40149   | 186.39929    | 48.7708 |
| 2      | 8.872         | VB   | 0.1647      | 1993.04749   | 180.66096    | 51.2292 |

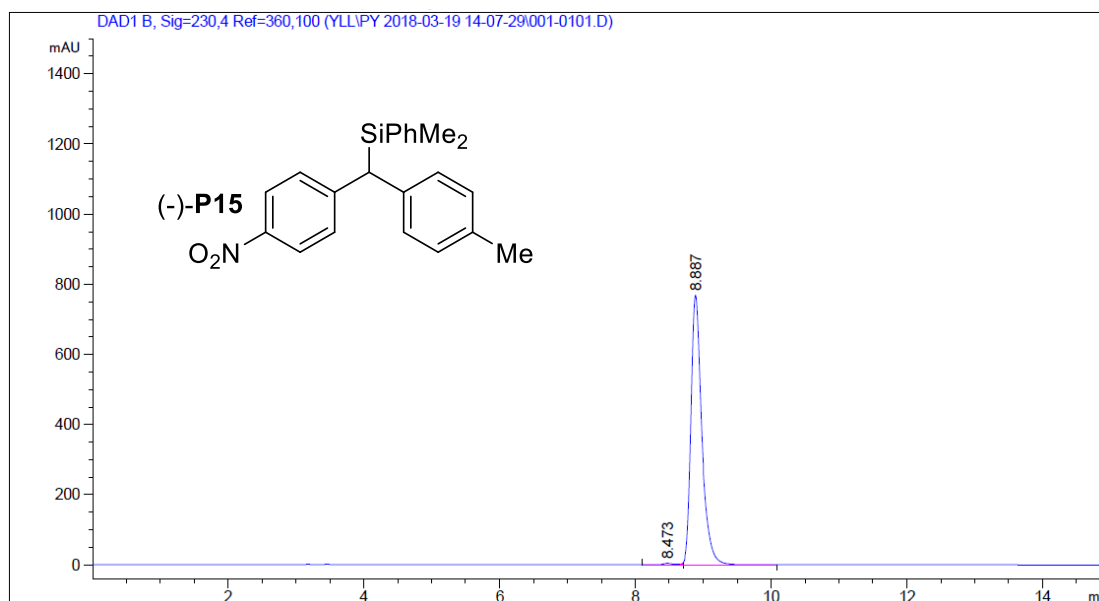

| Peak # | RetTime [min] | Type | Width [min] | Area [mAU*s] | Height [mAU] | Area %  |
|--------|---------------|------|-------------|--------------|--------------|---------|
| 1      | 8.473         | BV E | 0.1626      | 45.82573     | 4.15760      | 0.5366  |
| 2      | 8.887         | VB R | 0.1648      | 8493.77637   | 769.12256    | 99.4634 |

**(-)-((4-fluorophenyl)(4-nitrophenyl)methyl)dimethyl(phenyl)silane (P16)**

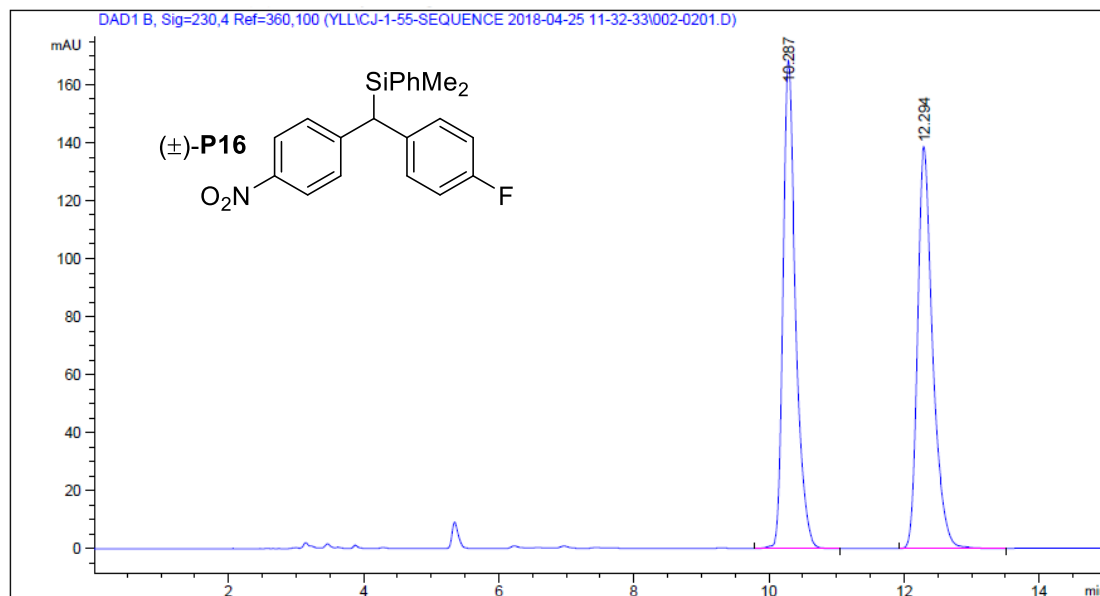

| Peak # | RetTime [min] | Type | Width [min] | Area [mAU*s] | Height [mAU] | Area %  |
|--------|---------------|------|-------------|--------------|--------------|---------|
| 1      | 10.287        | BB   | 0.1917      | 2158.41650   | 168.17952    | 49.9793 |
| 2      | 12.294        | BB   | 0.2338      | 2160.20557   | 138.59587    | 50.0207 |

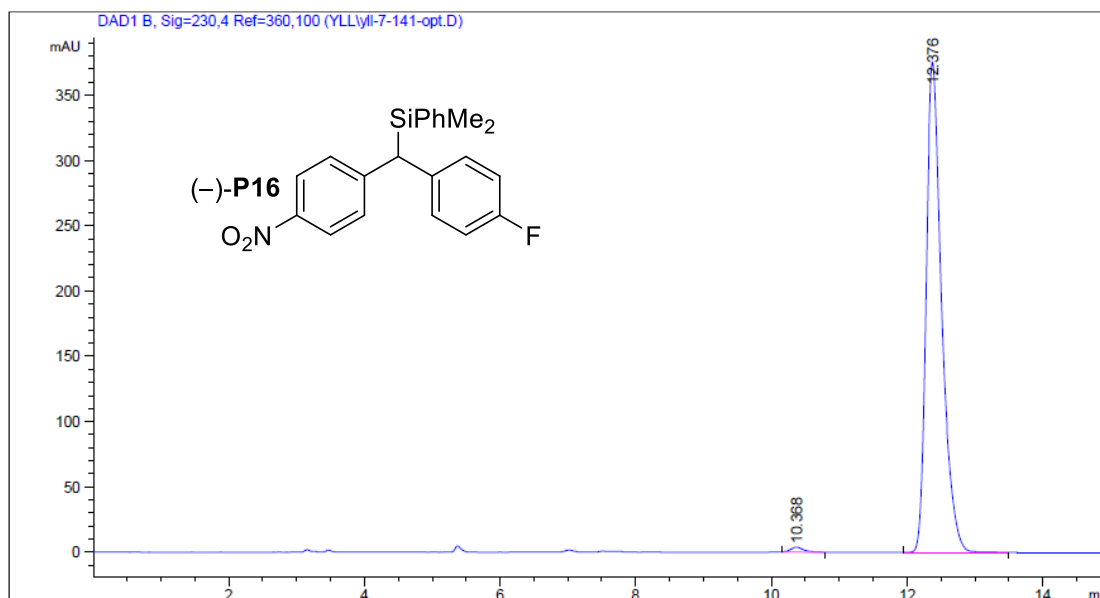

| Peak # | RetTime [min] | Type | Width [min] | Area [mAU*s] | Height [mAU] | Area %  |
|--------|---------------|------|-------------|--------------|--------------|---------|
| 1      | 10.368        | BB   | 0.1870      | 45.44220     | 3.65537      | 0.7593  |
| 2      | 12.376        | BB   | 0.2386      | 5939.28223   | 375.29282    | 99.2407 |

**(±)-((4-bromophenyl)(4-nitrophenyl)methyl)dimethyl(phenyl)silane (P17)**

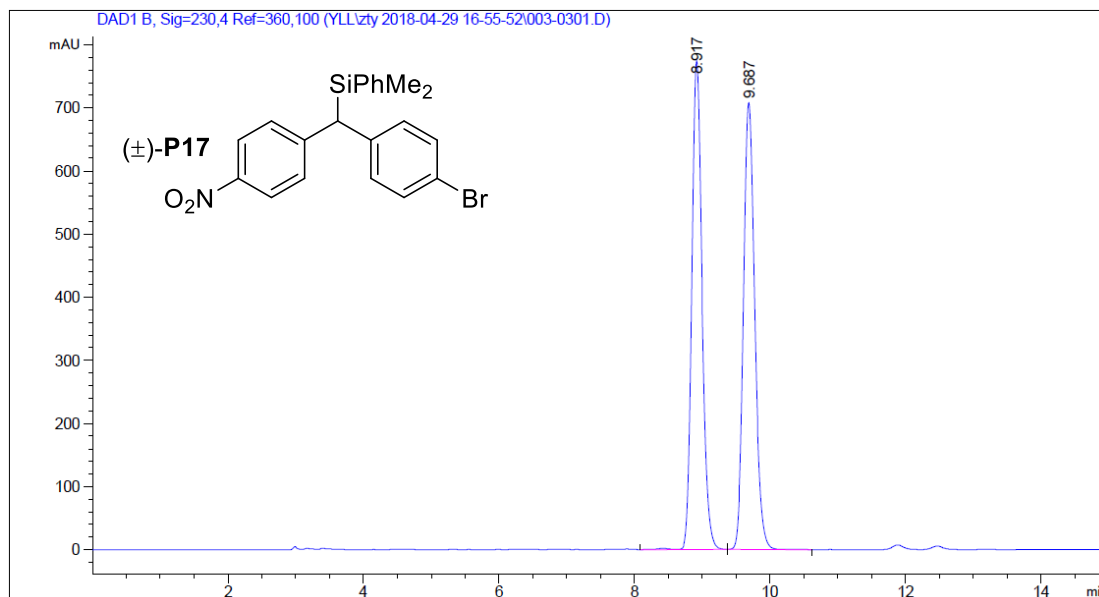

| Peak # | RetTime [min] | Type | Width [min] | Area [mAU*s] | Height [mAU] | Area %  |
|--------|---------------|------|-------------|--------------|--------------|---------|
| 1      | 8.917         | VB R | 0.1597      | 8104.49512   | 774.54321    | 50.0027 |
| 2      | 9.687         | BB   | 0.1775      | 8103.61816   | 708.22925    | 49.9973 |

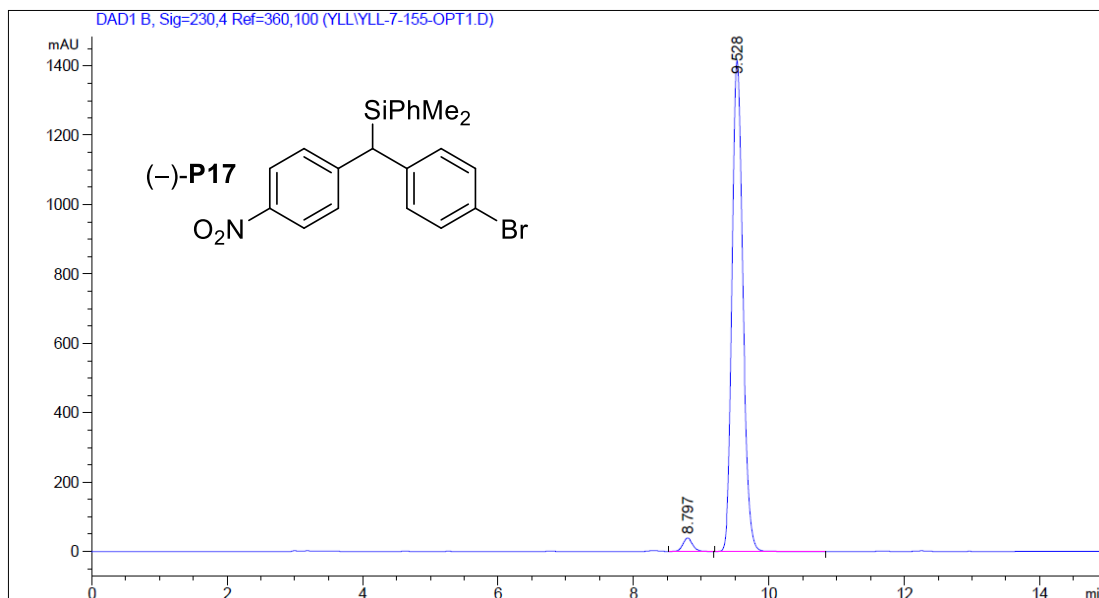

| Peak # | RetTime [min] | Type | Width [min] | Area [mAU*s] | Height [mAU] | Area %  |
|--------|---------------|------|-------------|--------------|--------------|---------|
| 1      | 8.797         | BB   | 0.1555      | 388.27914    | 38.56146     | 2.4112  |
| 2      | 9.528         | BB   | 0.1715      | 1.57149e4    | 1415.55640   | 97.5888 |

**(-)-((4-chlorophenyl)(4-nitrophenyl)methyl)dimethyl(phenyl)silane (P18)**

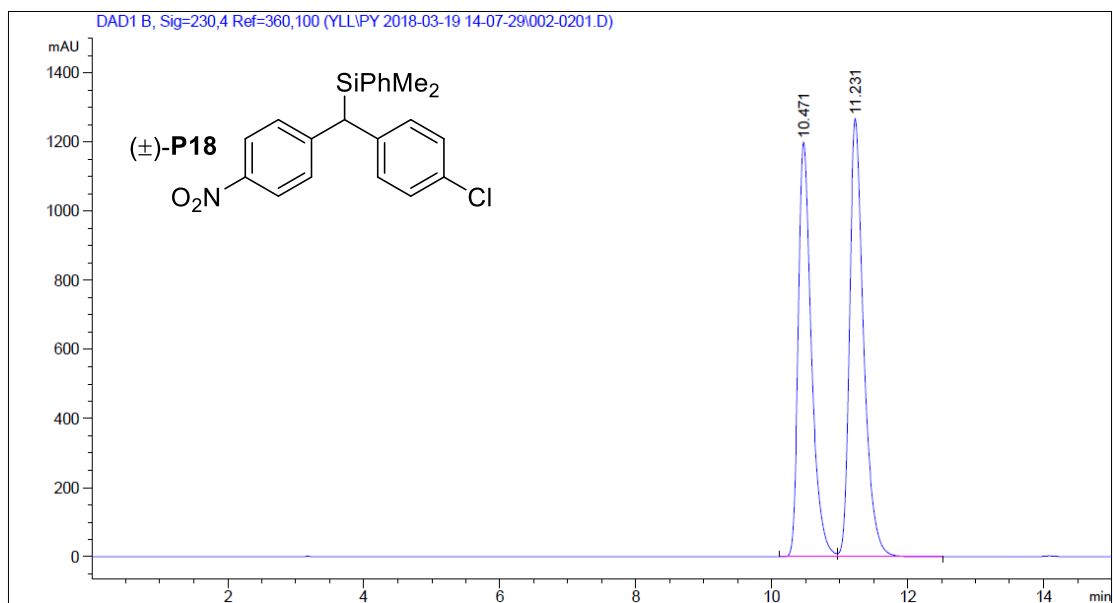

| Peak # | RetTime [min] | Type | Width [min] | Area [mAU*s] | Height [mAU] | Area %  |
|--------|---------------|------|-------------|--------------|--------------|---------|
| 1      | 10.471        | BV   | 0.2015      | 1.59805e4    | 1198.82263   | 46.6315 |
| 2      | 11.231        | VB   | 0.2185      | 1.82892e4    | 1266.28638   | 53.3685 |

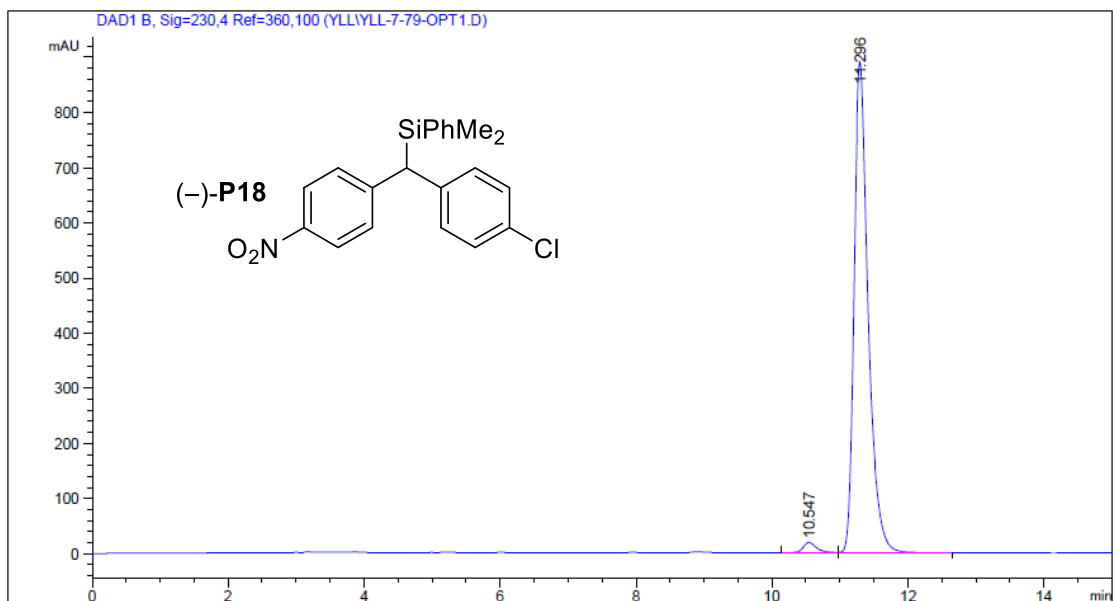

| Peak # | RetTime [min] | Type | Width [min] | Area [mAU*s] | Height [mAU] | Area %  |
|--------|---------------|------|-------------|--------------|--------------|---------|
| 1      | 10.547        | BV   | 0.1972      | 240.45412    | 18.31021     | 1.8518  |
| 2      | 11.296        | VB   | 0.2172      | 1.27444e4    | 889.21930    | 98.1482 |

**(-)-dimethyl((4-nitrophenyl)(4-(trifluoromethyl)phenyl)methyl)(phenyl)silane  
(P19)**

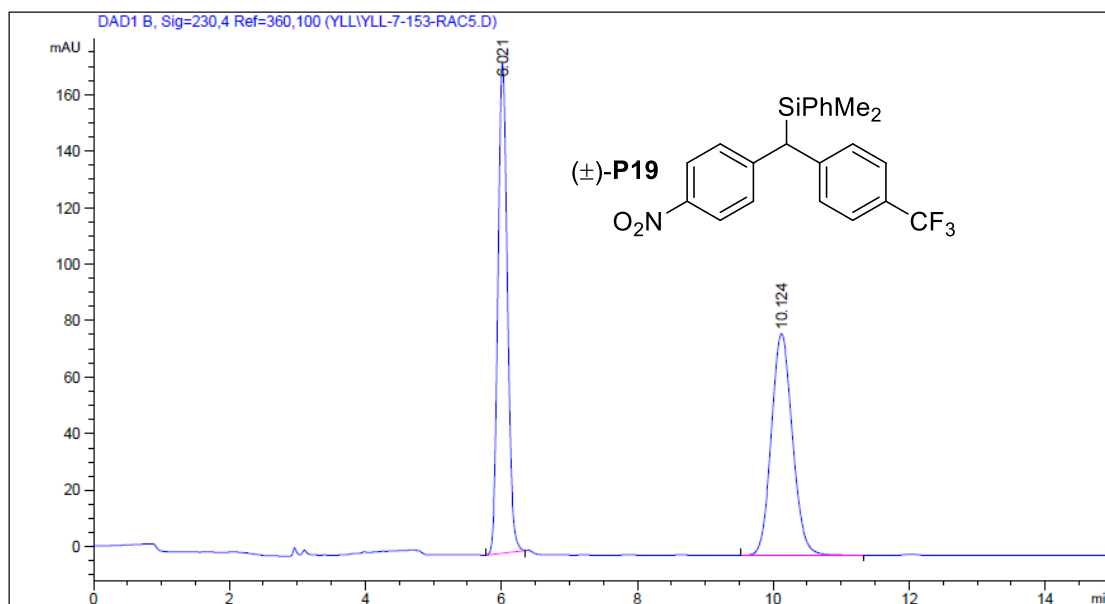

| Peak # | RetTime [min] | Type | Width [min] | Area [mAU*s] | Height [mAU] | Area %  |
|--------|---------------|------|-------------|--------------|--------------|---------|
| 1      | 6.021         | BB   | 0.1473      | 1654.47278   | 173.38531    | 49.5287 |
| 2      | 10.124        | BB   | 0.3330      | 1685.95752   | 78.36142     | 50.4713 |

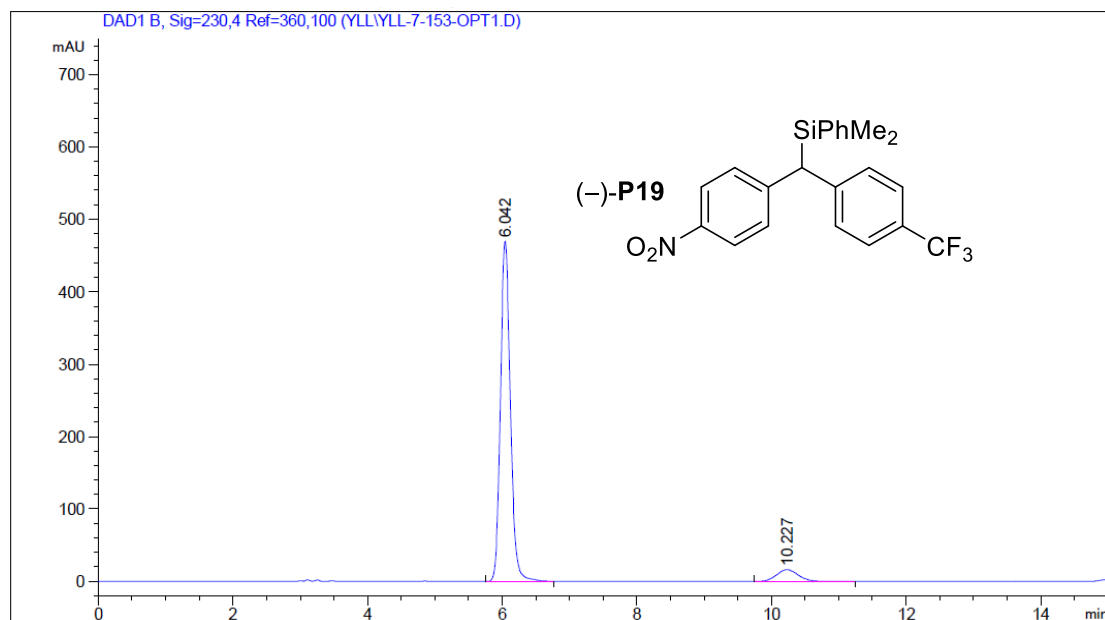

| Peak # | RetTime [min] | Type | Width [min] | Area [mAU*s] | Height [mAU] | Area %  |
|--------|---------------|------|-------------|--------------|--------------|---------|
| 1      | 6.042         | BB   | 0.1576      | 4813.60352   | 469.43262    | 93.0040 |
| 2      | 10.227        | BB   | 0.3485      | 362.09146    | 16.09033     | 6.9960  |

**(-)-4-((dimethyl(phenyl)silyl)(4-(trifluoromethyl)phenyl)methyl)benzonitrile (P20)**

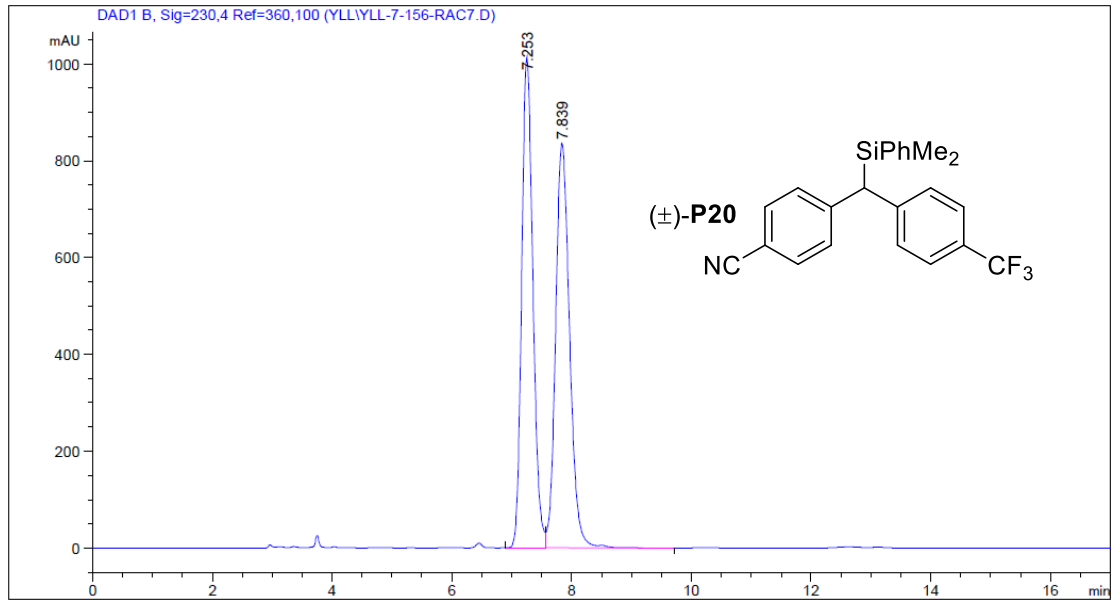

| Peak # | RetTime [min] | Type | Width [min] | Area [mAU*s] | Height [mAU] | Area %  |
|--------|---------------|------|-------------|--------------|--------------|---------|
| 1      | 7.253         | BV   | 0.2014      | 1.31635e4    | 1014.54059   | 49.2358 |
| 2      | 7.839         | VV R | 0.2508      | 1.35722e4    | 836.18707    | 50.7642 |

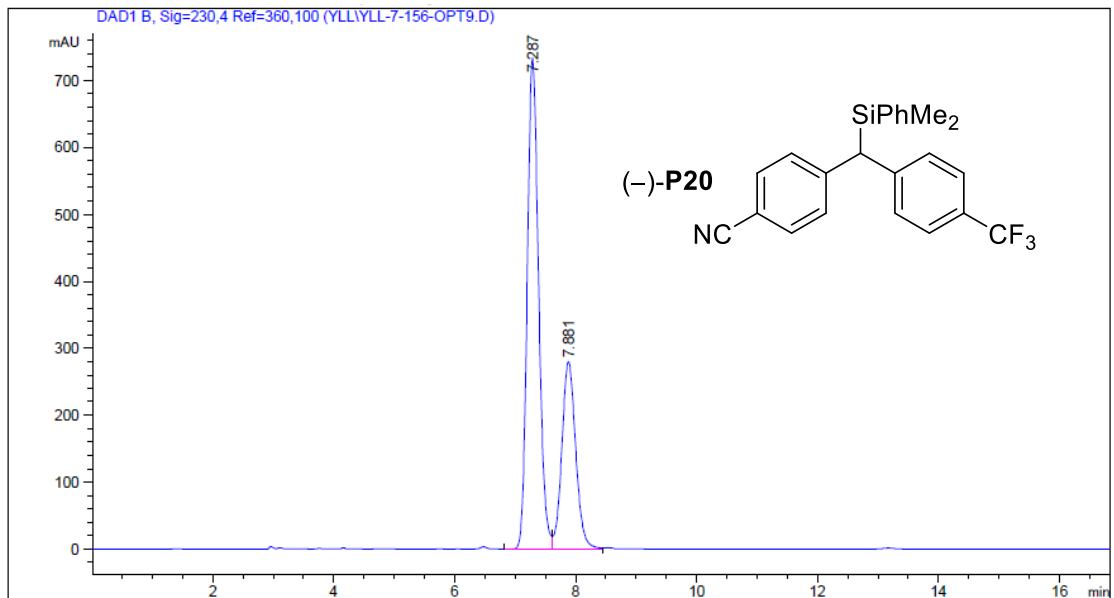

| Peak # | RetTime [min] | Type | Width [min] | Area [mAU*s] | Height [mAU] | Area %  |
|--------|---------------|------|-------------|--------------|--------------|---------|
| 1      | 7.287         | BV   | 0.2020      | 9547.83203   | 732.70526    | 68.0938 |
| 2      | 7.881         | VV   | 0.2465      | 4473.75439   | 279.81241    | 31.9062 |

**(-)-((4-methoxyphenyl)(4-(trifluoromethyl)phenyl)methyl)dimethyl(phenyl)silane  
(P21)**

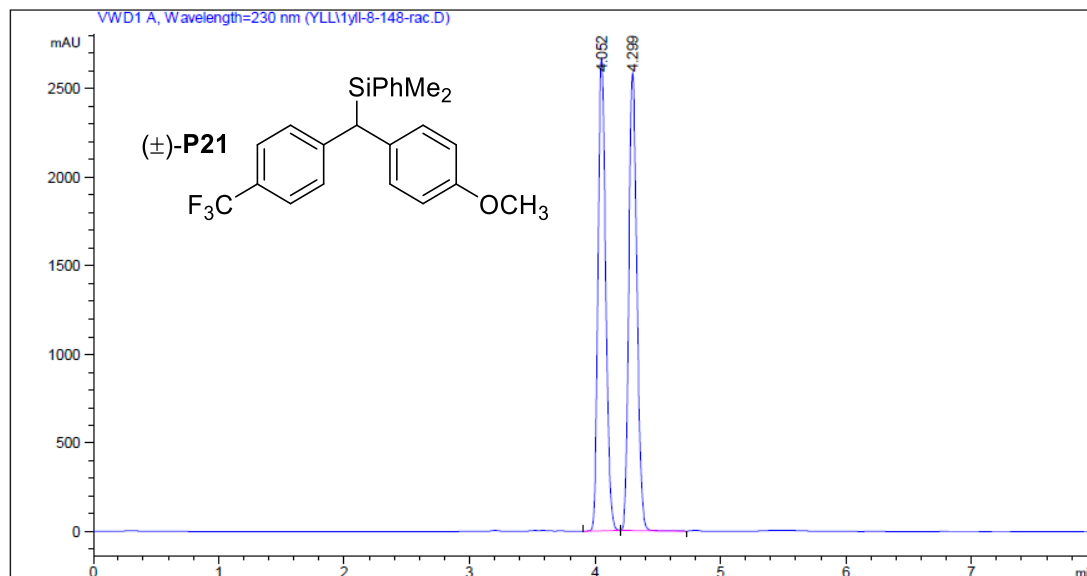

| Peak # | RetTime [min] | Type | Width [min] | Area [mAU*s] | Height [mAU] | Area %  |
|--------|---------------|------|-------------|--------------|--------------|---------|
| 1      | 4.052         | BB   | 0.0668      | 1.13849e4    | 2668.55908   | 49.5405 |
| 2      | 4.299         | BV R | 0.0704      | 1.15962e4    | 2582.93677   | 50.4595 |

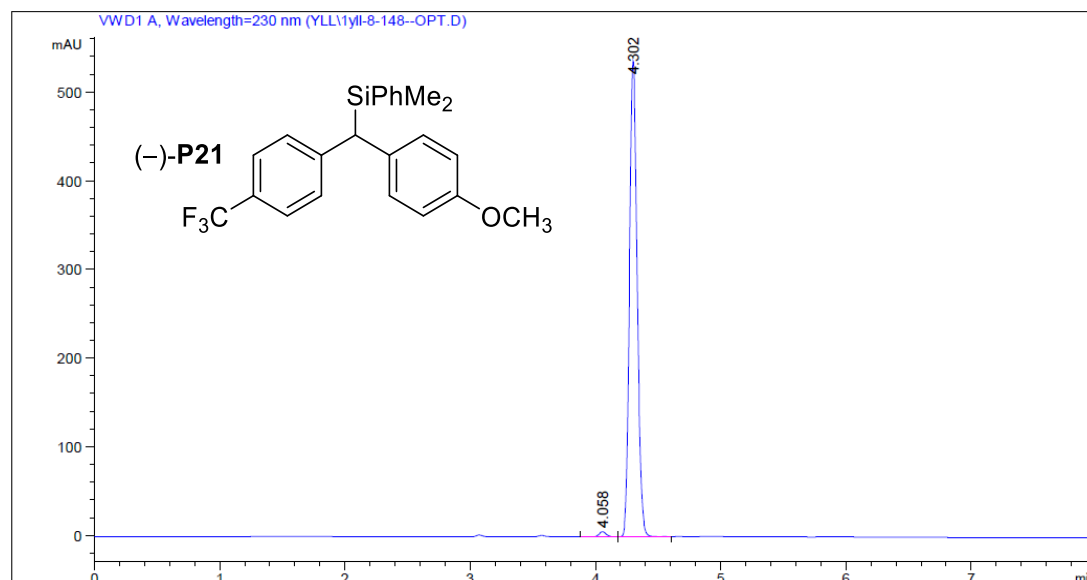

| Peak # | RetTime [min] | Type | Width [min] | Area [mAU*s] | Height [mAU] | Area %  |
|--------|---------------|------|-------------|--------------|--------------|---------|
| 1      | 4.058         | VB R | 0.0630      | 23.90394     | 5.81219      | 1.0325  |
| 2      | 4.302         | BV R | 0.0657      | 2291.19360   | 537.48883    | 98.9675 |

**(S)-p-tolyl(4-(trifluoromethyl)phenyl)methanol (22ol)**

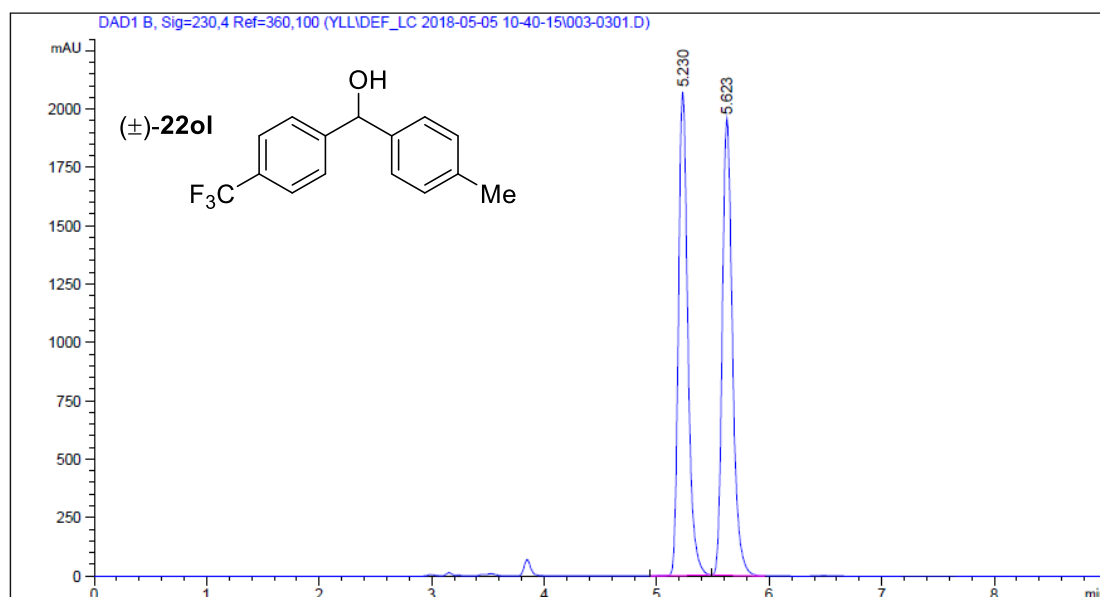

| Peak # | RetTime [min] | Type | Width [min] | Area [mAU*s] | Height [mAU] | Area %  |
|--------|---------------|------|-------------|--------------|--------------|---------|
| 1      | 5.230         | VB R | 0.0897      | 1.20373e4    | 2072.35522   | 49.5194 |
| 2      | 5.623         | BB   | 0.0971      | 1.22710e4    | 1957.53320   | 50.4806 |

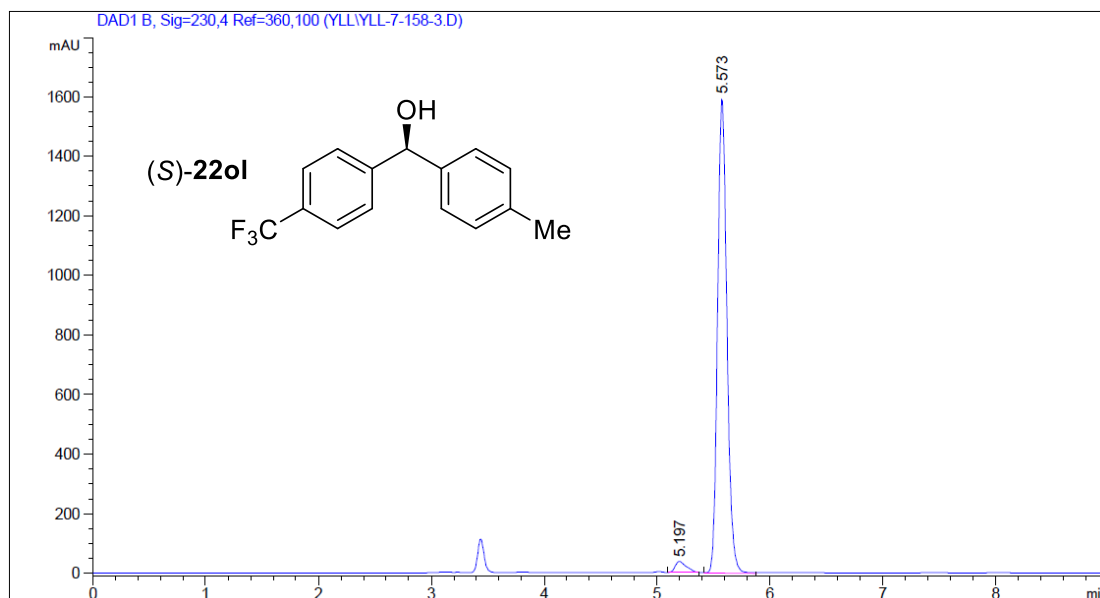

| Peak # | RetTime [min] | Type | Width [min] | Area [mAU*s] | Height [mAU] | Area %  |
|--------|---------------|------|-------------|--------------|--------------|---------|
| 1      | 5.197         | MM   | 0.1152      | 263.77548    | 38.14873     | 2.7977  |
| 2      | 5.573         | MM   | 0.0956      | 9164.50293   | 1597.35803   | 97.2023 |



**(+)-(4-fluorophenyl)(4-(trifluoromethyl)phenyl)methanol (23ol)**

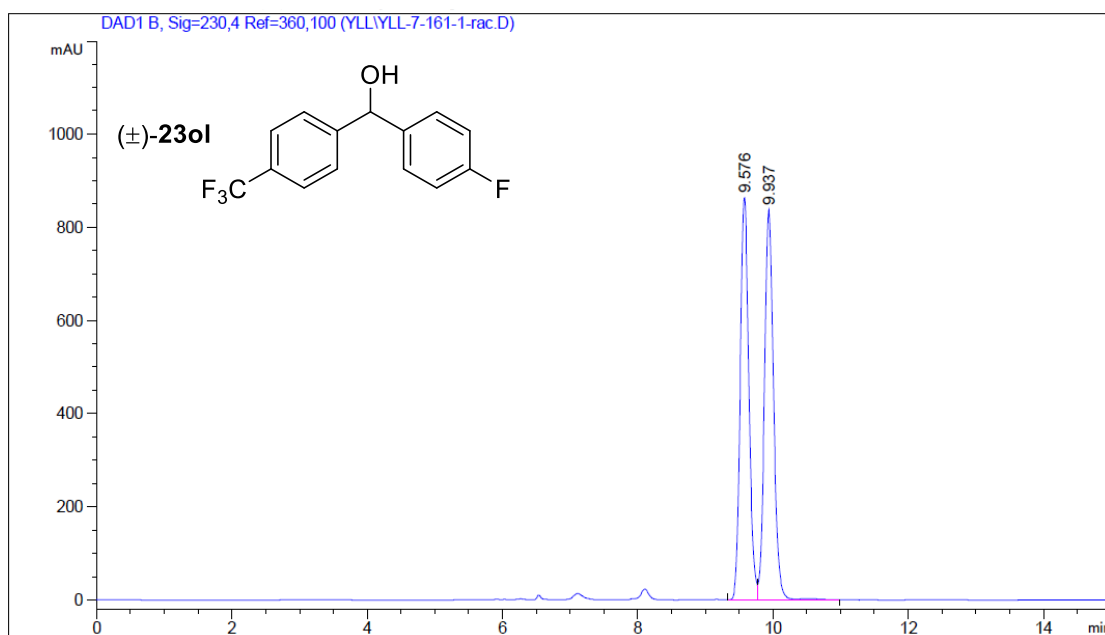

| Peak # | RetTime [min] | Type | Width [min] | Area [mAU*s] | Height [mAU] | Area %  |
|--------|---------------|------|-------------|--------------|--------------|---------|
| 1      | 9.576         | BV   | 0.1375      | 7670.19043   | 864.59674    | 49.3906 |
| 2      | 9.937         | WV R | 0.1445      | 7859.46191   | 838.10309    | 50.6094 |

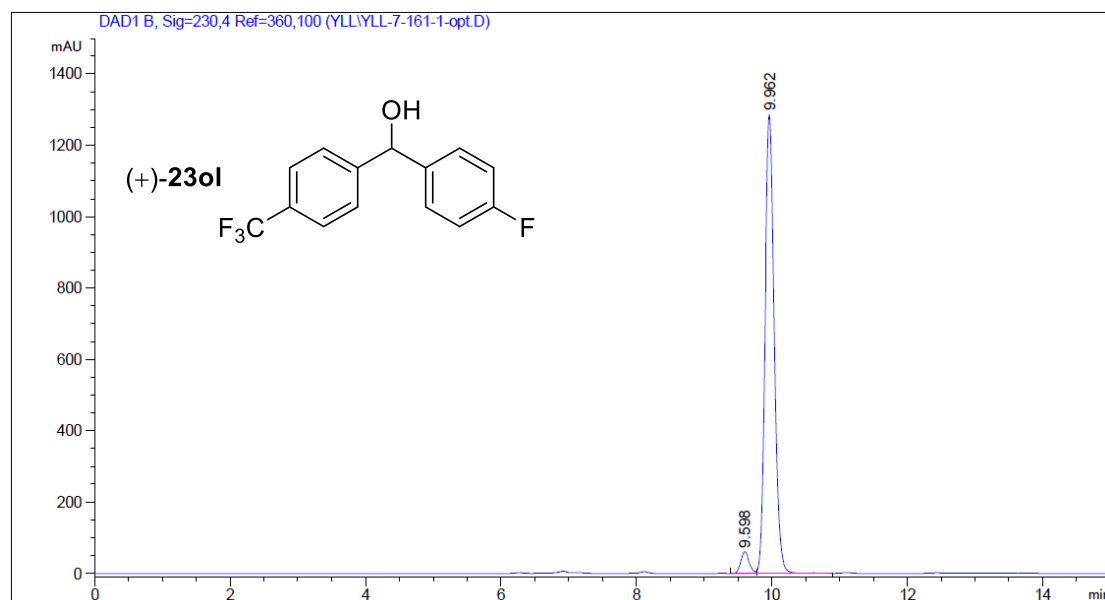

| Peak # | RetTime [min] | Type | Width [min] | Area [mAU*s] | Height [mAU] | Area %  |
|--------|---------------|------|-------------|--------------|--------------|---------|
| 1      | 9.598         | BV E | 0.1316      | 521.79059    | 61.12857     | 4.1336  |
| 2      | 9.962         | WV R | 0.1456      | 1.21013e4    | 1285.75964   | 95.8664 |

**(+)-(4-bromophenyl)(4-(trifluoromethyl)phenyl)methanol (24ol)**

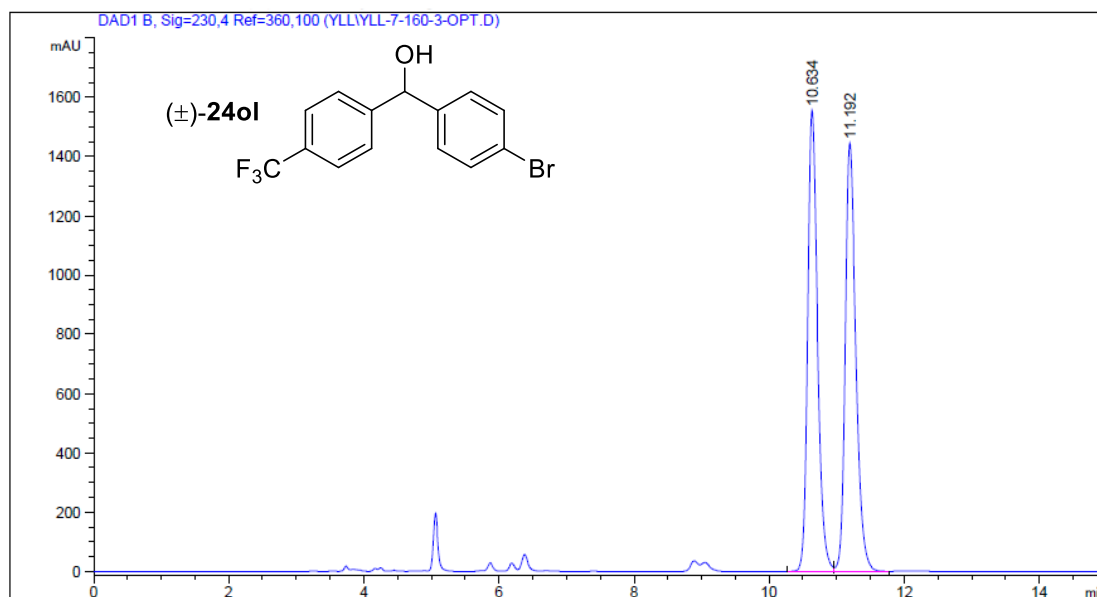

| Peak # | RetTime [min] | Type | Width [min] | Area [mAU*s] | Height [mAU] | Area %  |
|--------|---------------|------|-------------|--------------|--------------|---------|
| 1      | 10.634        | BV   | 0.1536      | 1.56828e4    | 1556.05774   | 49.8757 |
| 2      | 11.192        | VB   | 0.1672      | 1.57610e4    | 1445.61450   | 50.1243 |

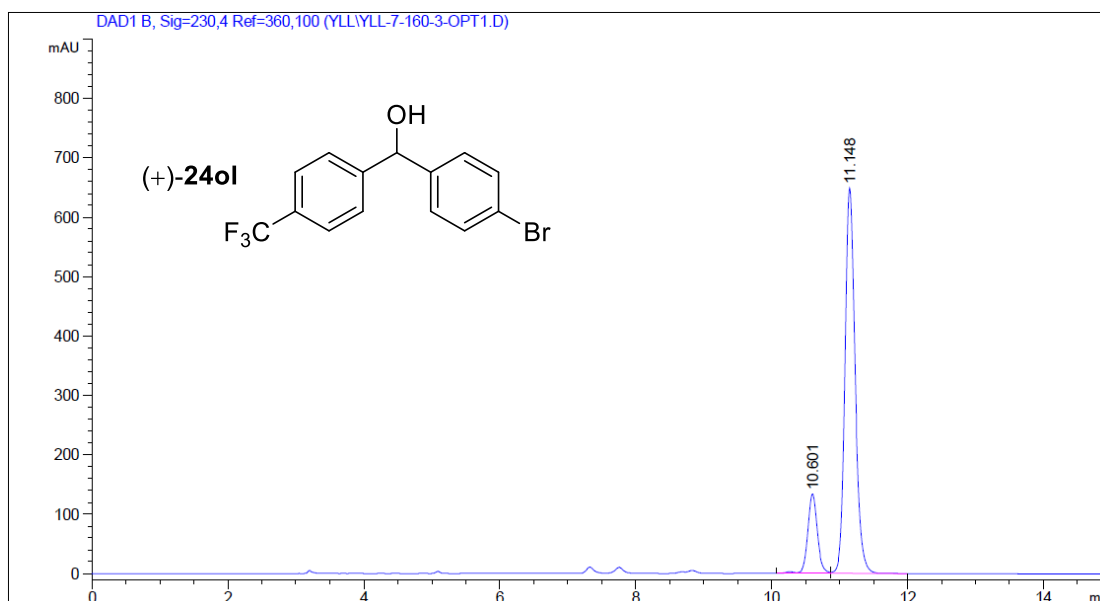

| Peak # | RetTime [min] | Type | Width [min] | Area [mAU*s] | Height [mAU] | Area %  |
|--------|---------------|------|-------------|--------------|--------------|---------|
| 1      | 10.601        | VV R | 0.1461      | 1307.80090   | 133.72392    | 16.3181 |
| 2      | 11.148        | VB   | 0.1566      | 6706.64014   | 648.90692    | 83.6819 |

**(R)-(4-chlorophenyl)(4-(trifluoromethyl)phenyl)methanol (25ol)**

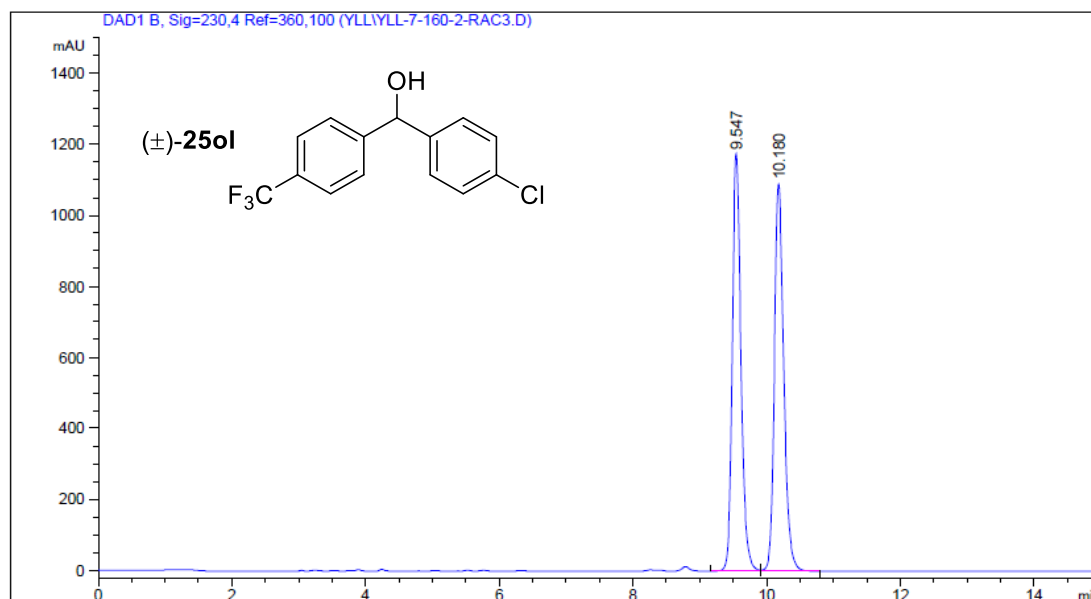

| Peak # | RetTime [min] | Type | Width [min] | Area [mAU*s] | Height [mAU] | Area %  |
|--------|---------------|------|-------------|--------------|--------------|---------|
| 1      | 9.547         | BV   | 0.1370      | 1.05914e4    | 1176.46558   | 49.9035 |
| 2      | 10.180        | VB   | 0.1476      | 1.06323e4    | 1091.90283   | 50.0965 |

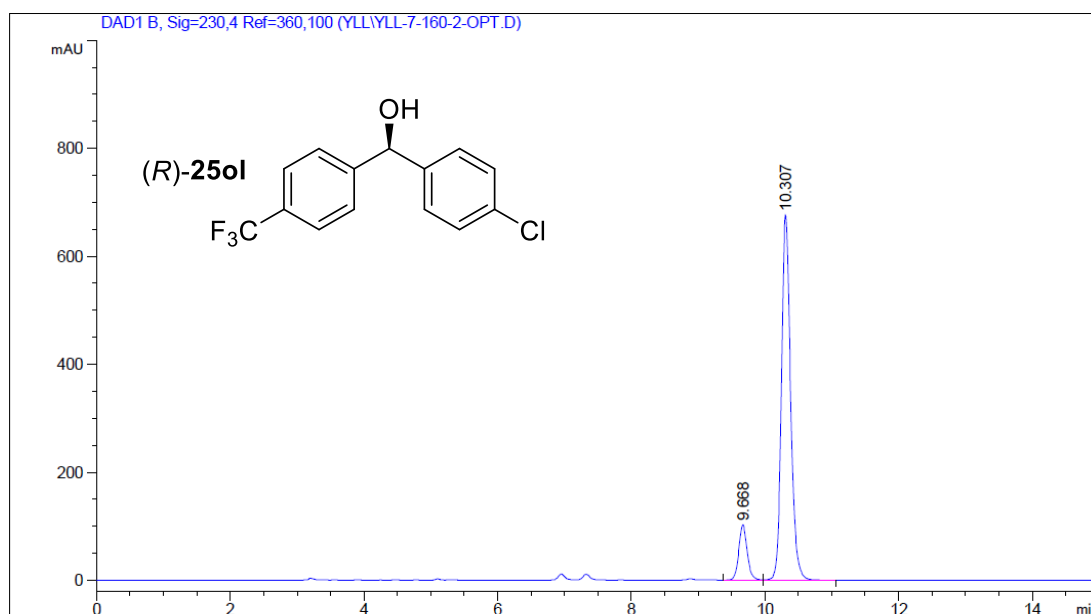

| Peak # | RetTime [min] | Type | Width [min] | Area [mAU*s] | Height [mAU] | Area %  |
|--------|---------------|------|-------------|--------------|--------------|---------|
| 1      | 9.668         | BV   | 0.1347      | 900.07404    | 102.25128    | 12.2302 |
| 2      | 10.307        | VB   | 0.1473      | 6459.37695   | 676.79004    | 87.7698 |

**(-)-((4-methoxyphenyl)(4-(trifluoromethoxy)phenyl)methyl)dimethyl(phenyl)silane (P26)**

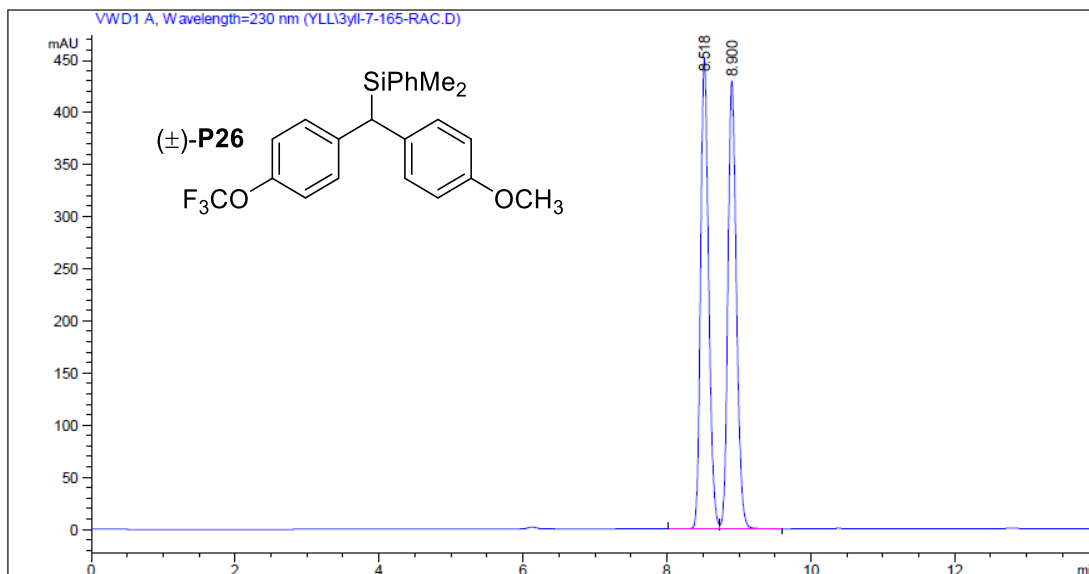

| Peak # | RetTime [min] | Type | Width [min] | Area [mAU*s] | Height [mAU] | Area %  |
|--------|---------------|------|-------------|--------------|--------------|---------|
| 1      | 8.518         | VV R | 0.1202      | 3523.65503   | 450.88245    | 49.8832 |
| 2      | 8.900         | VB   | 0.1261      | 3540.16187   | 429.95889    | 50.1168 |

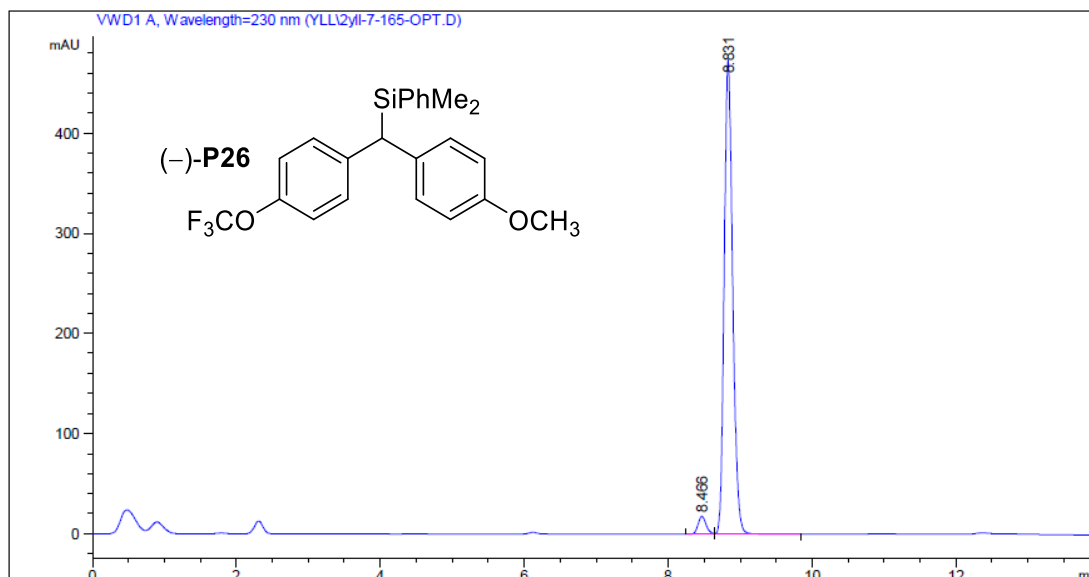

| Peak # | RetTime [min] | Type | Width [min] | Area [mAU*s] | Height [mAU] | Area %  |
|--------|---------------|------|-------------|--------------|--------------|---------|
| 1      | 8.466         | BV   | 0.1192      | 138.66765    | 17.93404     | 3.4646  |
| 2      | 8.831         | VB   | 0.1252      | 3863.77832   | 473.34445    | 96.5354 |

**(-)-((4-bromophenyl)(4-methoxyphenyl)methyl)dimethyl(phenyl)silane (P27)**

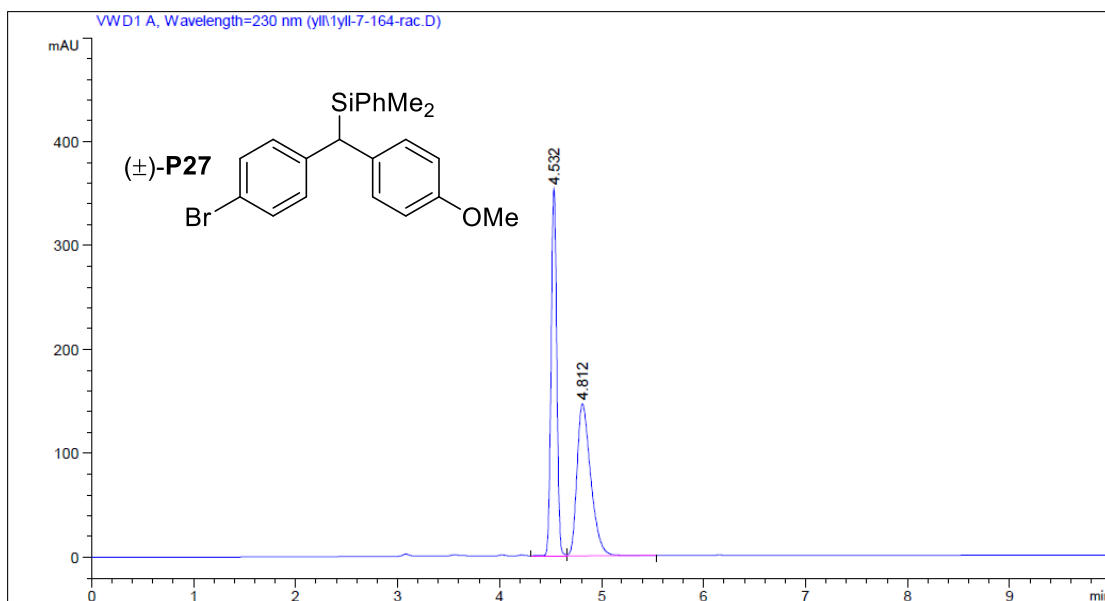

| Peak # | RetTime [min] | Type | Width [min] | Area [mAU*s] | Height [mAU] | Area %  |
|--------|---------------|------|-------------|--------------|--------------|---------|
| 1      | 4.532         | VV R | 0.0600      | 1359.99036   | 352.87143    | 49.8513 |
| 2      | 4.812         | VB   | 0.1422      | 1368.10400   | 146.21945    | 50.1487 |

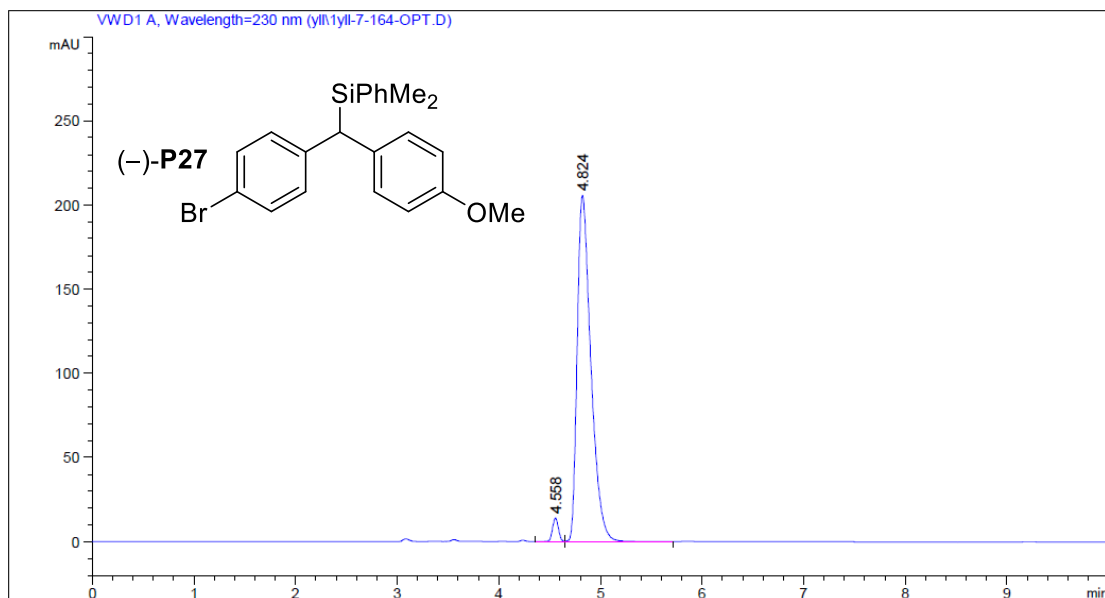

| Peak # | RetTime [min] | Type | Width [min] | Area [mAU*s] | Height [mAU] | Area %  |
|--------|---------------|------|-------------|--------------|--------------|---------|
| 1      | 4.558         | BV   | 0.0638      | 58.09558     | 14.18501     | 2.9280  |
| 2      | 4.824         | VB   | 0.1422      | 1926.04944   | 205.72449    | 97.0720 |

**(-)-((4-chlorophenyl)(4-methoxyphenyl)methyl)dimethyl(phenyl)silane (P28)**

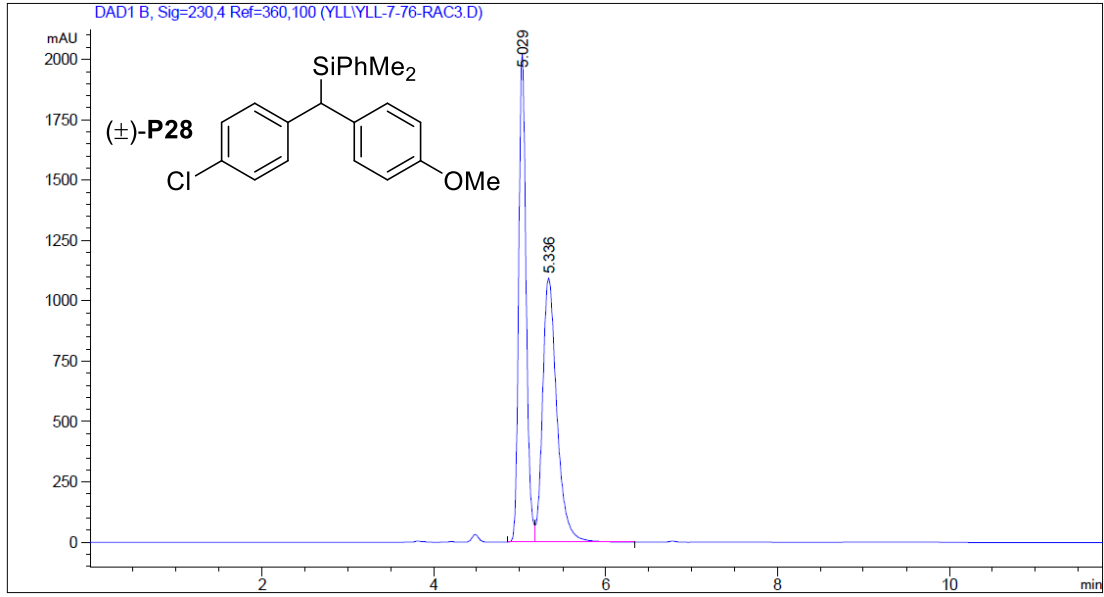

| Peak # | RetTime [min] | Type | Width [min] | Area [mAU*s] | Height [mAU] | Area %  |
|--------|---------------|------|-------------|--------------|--------------|---------|
| 1      | 5.029         | BV   | 0.0920      | 1.21203e4    | 2021.40930   | 49.0235 |
| 2      | 5.336         | VB   | 0.1744      | 1.26032e4    | 1093.84204   | 50.9765 |

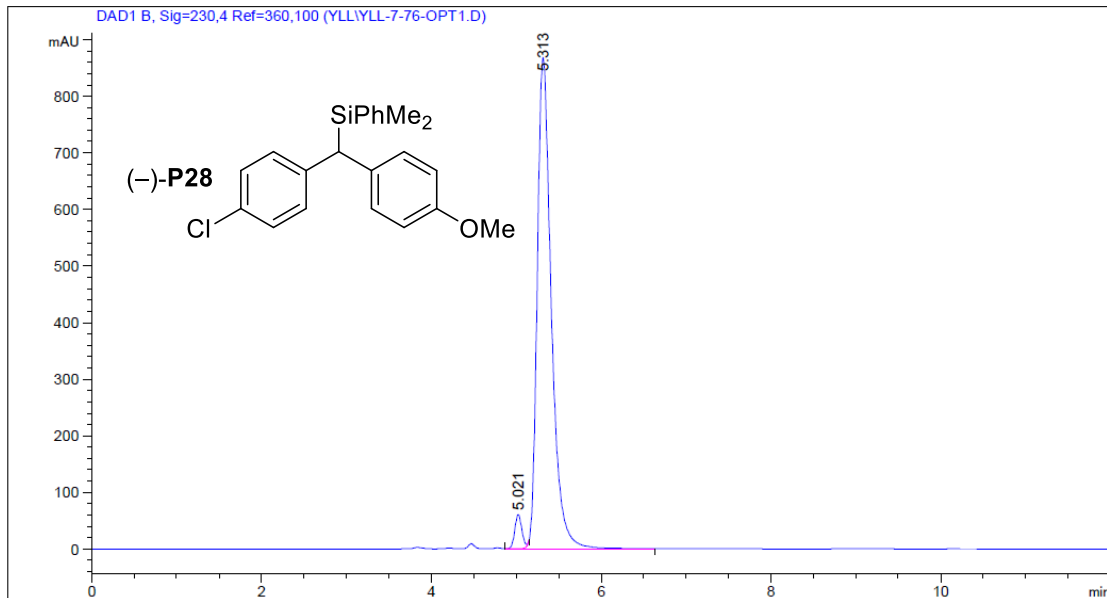

| Peak # | RetTime [min] | Type | Width [min] | Area [mAU*s] | Height [mAU] | Area %  |
|--------|---------------|------|-------------|--------------|--------------|---------|
| 1      | 5.021         | BV E | 0.0894      | 350.57162    | 60.70612     | 3.3890  |
| 2      | 5.313         | VB R | 0.1743      | 9993.88184   | 868.28357    | 96.6110 |

### (R)-(4-fluorophenyl)(4-methoxyphenyl)methanol (29ol)

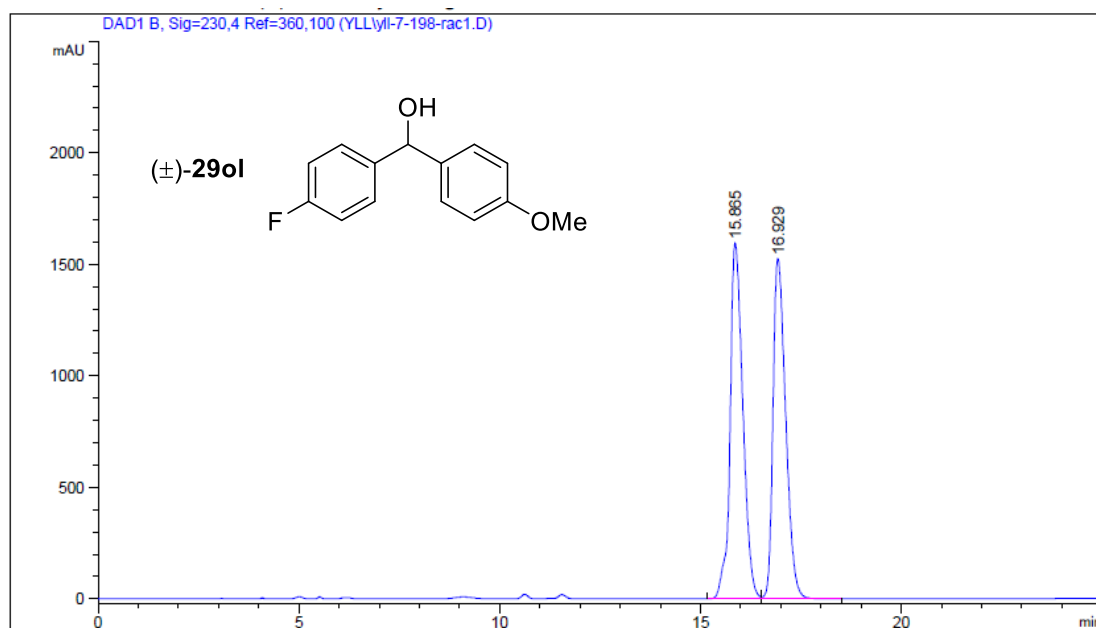

| Peak # | RetTime [min] | Type | Width [min] | Area [mAU*s] | Height [mAU] | Area %  |
|--------|---------------|------|-------------|--------------|--------------|---------|
| 1      | 15.865        | BV   | 0.3401      | 3.52569e4    | 1593.43994   | 51.3376 |
| 2      | 16.929        | VB   | 0.3417      | 3.34197e4    | 1524.66736   | 48.6624 |

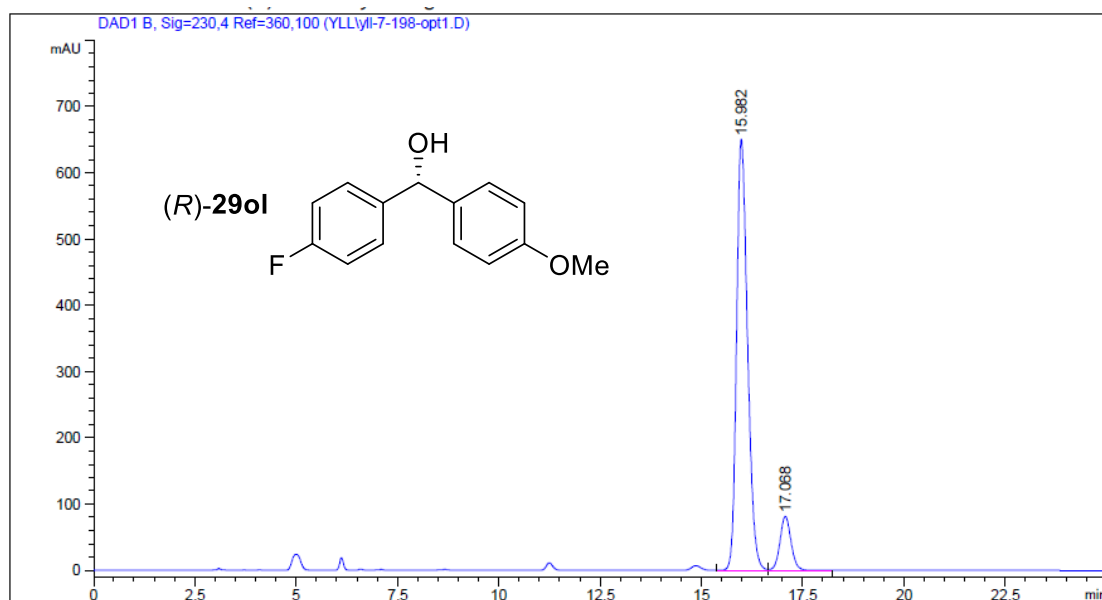

| Peak # | RetTime [min] | Type | Width [min] | Area [mAU*s] | Height [mAU] | Area %  |
|--------|---------------|------|-------------|--------------|--------------|---------|
| 1      | 15.982        | BV   | 0.2889      | 1.22105e4    | 650.81470    | 88.7221 |
| 2      | 17.068        | VB   | 0.2941      | 1552.14087   | 81.53400     | 11.2779 |

**(-)-((4-methoxyphenyl)(p-tolyl)methyl)dimethyl(phenyl)silane (P30)**

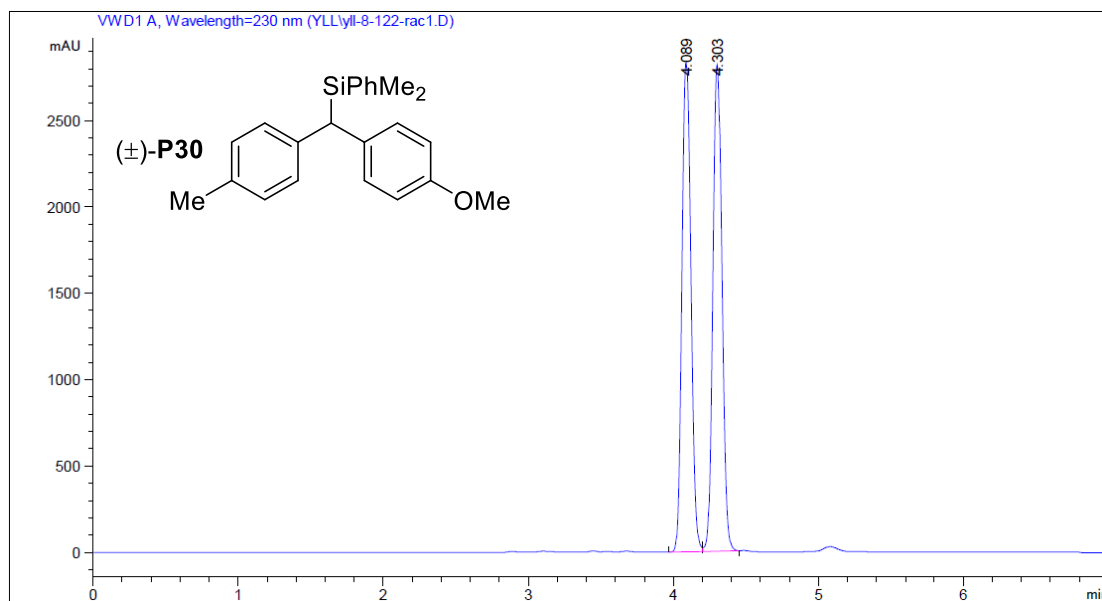

| Peak # | RetTime [min] | Type | Width [min] | Area [mAU*s] | Height [mAU] | Area %  |
|--------|---------------|------|-------------|--------------|--------------|---------|
| 1      | 4.089         | BV   | 0.0685      | 1.22602e4    | 2834.38892   | 49.8050 |
| 2      | 4.303         | VB   | 0.0702      | 1.23562e4    | 2817.98047   | 50.1950 |

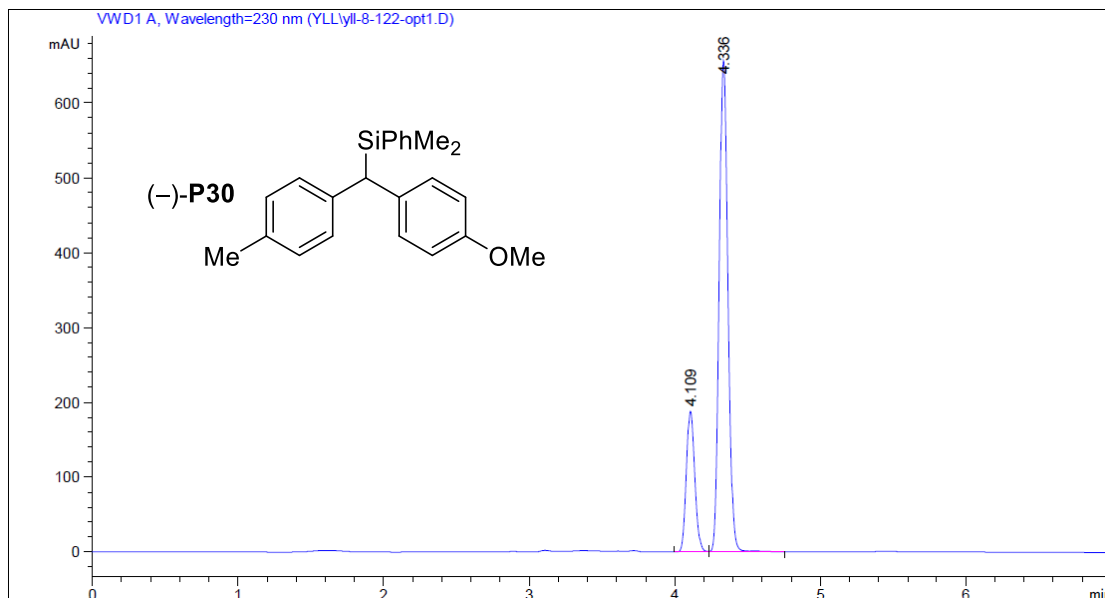

| Peak # | RetTime [min] | Type | Width [min] | Area [mAU*s] | Height [mAU] | Area %  |
|--------|---------------|------|-------------|--------------|--------------|---------|
| 1      | 4.109         | BV   | 0.0622      | 761.56470    | 188.30223    | 21.7014 |
| 2      | 4.336         | VV R | 0.0648      | 2747.73022   | 656.86603    | 78.2986 |



**(+)-dimethyl(naphthalen-2-yl(phenyl)methyl)(phenyl)silane (P31)**

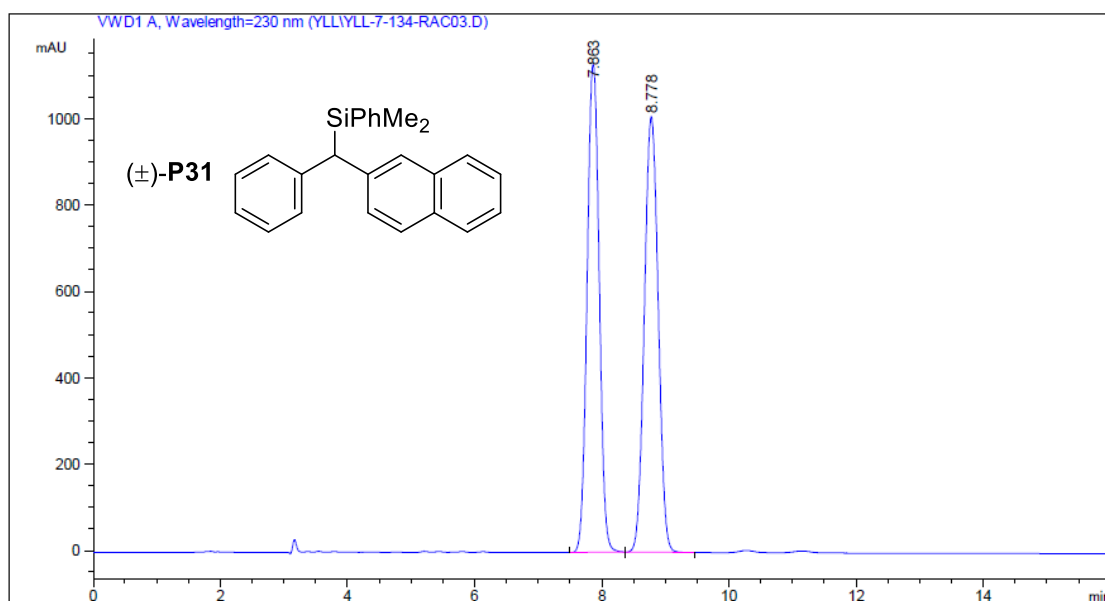

| Peak # | RetTime [min] | Type | Width [min] | Area mAU *s | Height [mAU] | Area %  |
|--------|---------------|------|-------------|-------------|--------------|---------|
| 1      | 7.863         | BB   | 0.2086      | 1.48551e4   | 1130.39685   | 49.3667 |
| 2      | 8.778         | BB   | 0.2390      | 1.52362e4   | 1007.95526   | 50.6333 |

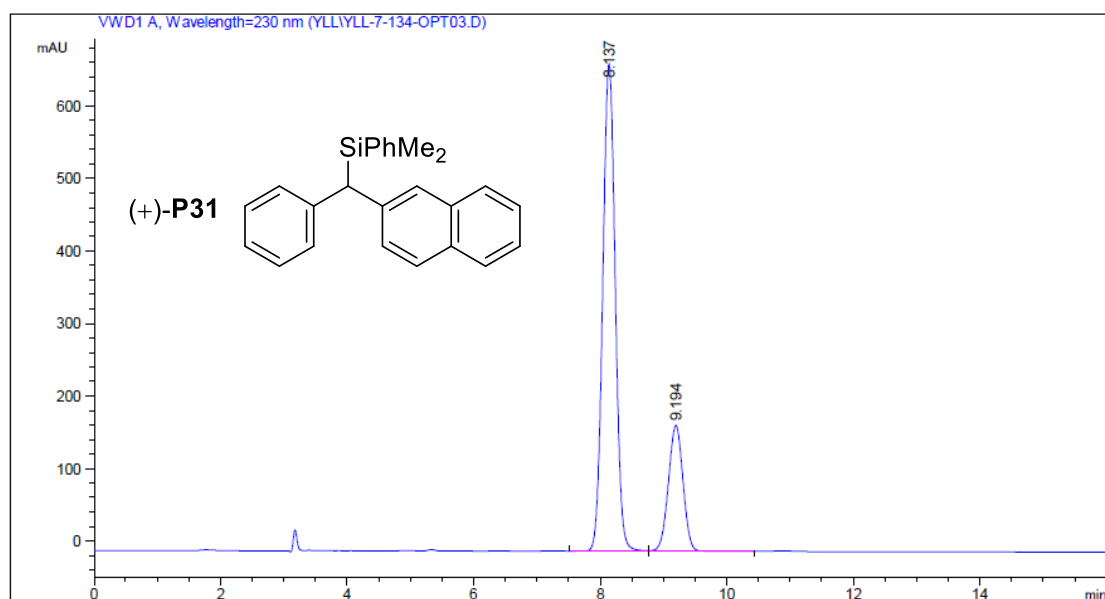

| Peak # | RetTime [min] | Type | Width [min] | Area mAU *s | Height [mAU] | Area %  |
|--------|---------------|------|-------------|-------------|--------------|---------|
| 1      | 8.137         | BV   | 0.2148      | 9183.89648  | 671.81177    | 76.6400 |
| 2      | 9.194         | VV   | 0.2520      | 2799.26709  | 173.80780    | 23.3600 |

**(±)-dimethyl(naphthalen-2-yl(4-nitrophenyl)methyl)(phenyl)silane (P32)**

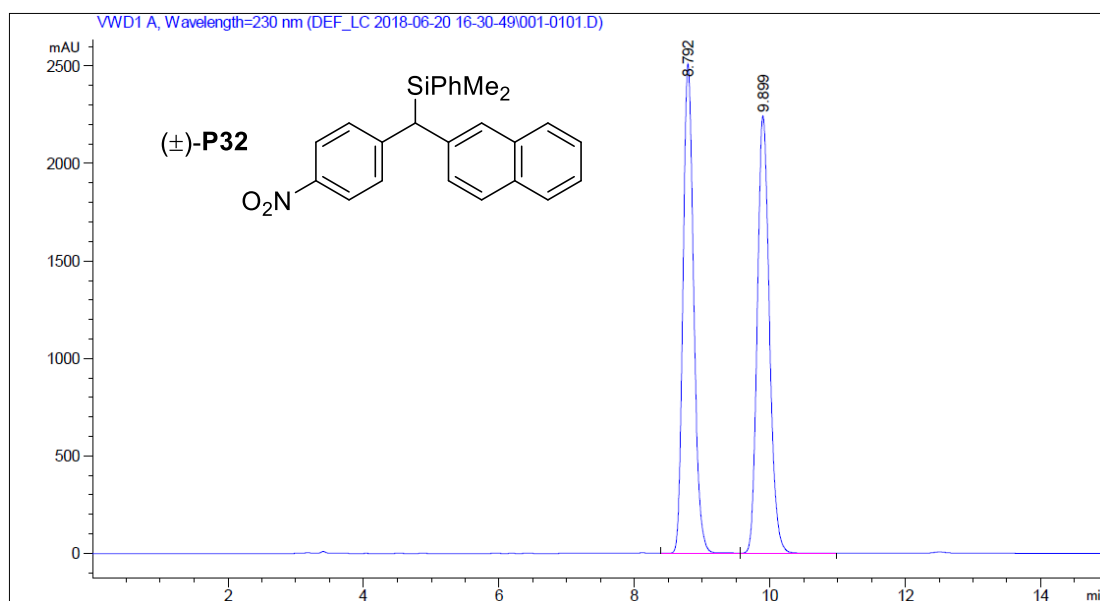

| Peak # | RetTime [min] | Type | Width [min] | Area [mAU*s] | Height [mAU] | Area %  |
|--------|---------------|------|-------------|--------------|--------------|---------|
| 1      | 8.792         | BV R | 0.1709      | 2.75522e4    | 2510.41724   | 49.6952 |
| 2      | 9.899         | VB   | 0.1932      | 2.78902e4    | 2241.60596   | 50.3048 |

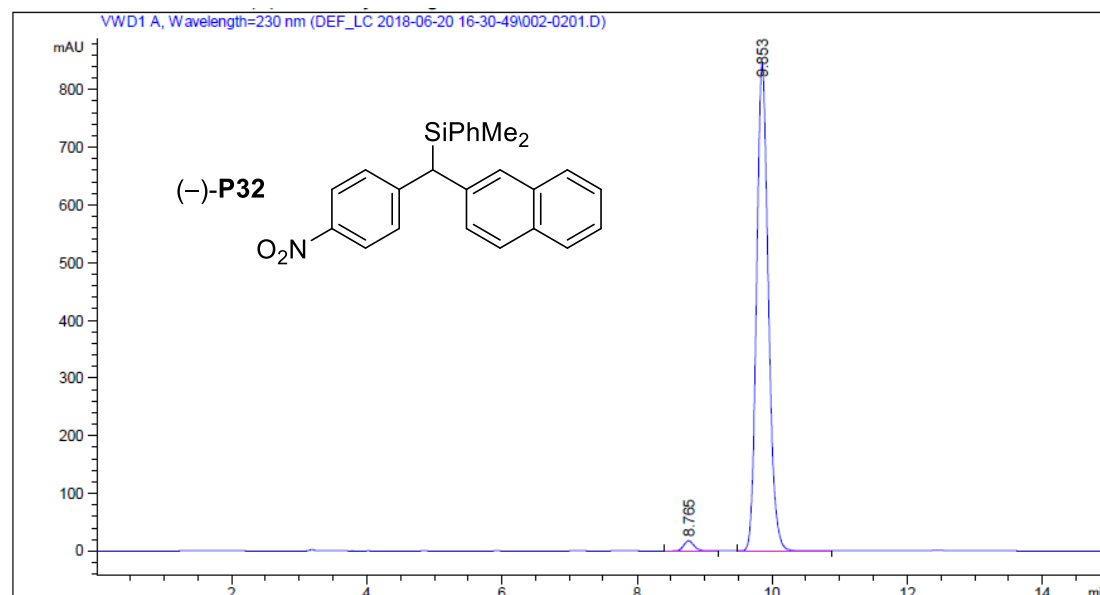

| Peak # | RetTime [min] | Type | Width [min] | Area [mAU*s] | Height [mAU] | Area %  |
|--------|---------------|------|-------------|--------------|--------------|---------|
| 1      | 8.765         | BB   | 0.1617      | 185.69287    | 17.66323     | 1.7822  |
| 2      | 9.853         | BB   | 0.1862      | 1.02334e4    | 845.73407    | 98.2178 |

**(-)-((2-methoxyphenyl)(phenyl)methyl)dimethyl(phenyl)silane (P33)**

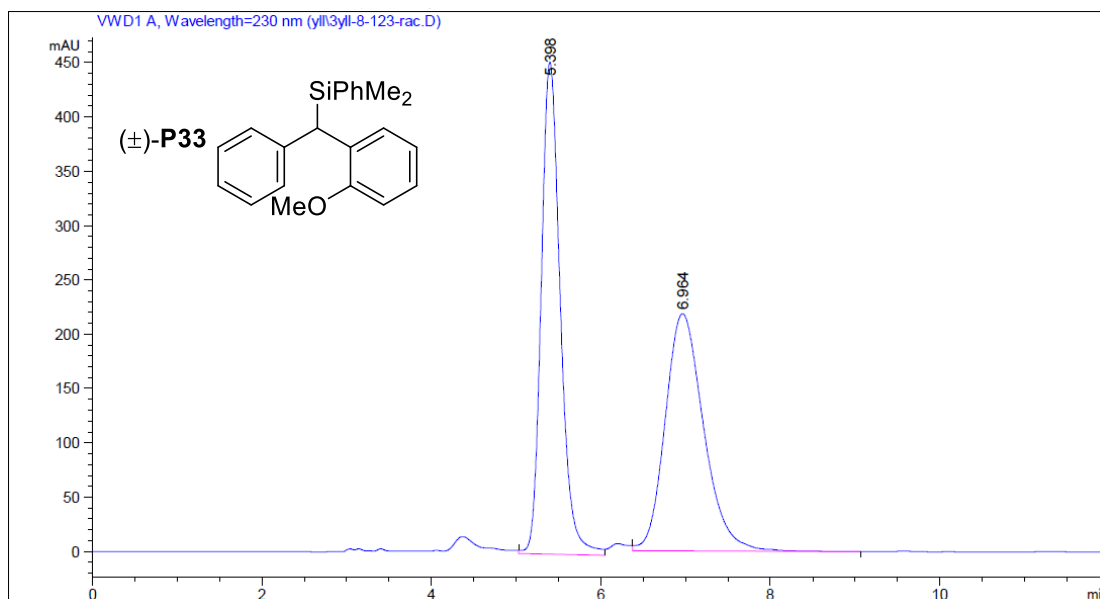

| Peak # | RetTime [min] | Type | Width [min] | Area [mAU*s] | Height [mAU] | Area %  |
|--------|---------------|------|-------------|--------------|--------------|---------|
| 1      | 5.398         | MM R | 0.2610      | 7094.85986   | 452.97665    | 50.6621 |
| 2      | 6.964         | VB   | 0.4860      | 6909.41553   | 218.45155    | 49.3379 |

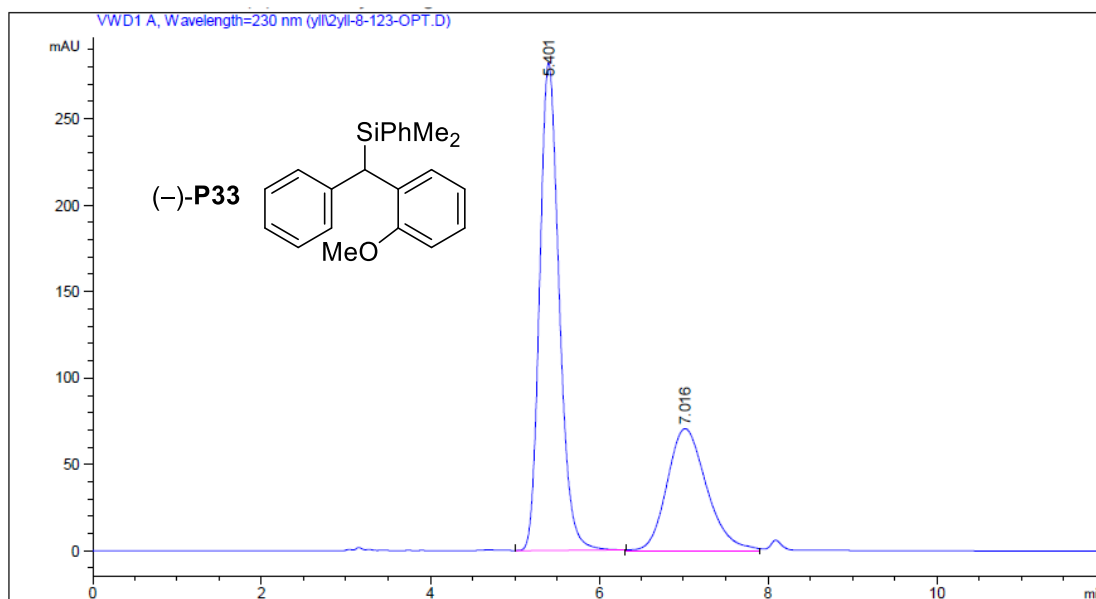

| Peak # | RetTime [min] | Type | Width [min] | Area [mAU*s] | Height [mAU] | Area %  |
|--------|---------------|------|-------------|--------------|--------------|---------|
| 1      | 5.401         | BB   | 0.2479      | 4520.97510   | 282.20248    | 66.2424 |
| 2      | 7.016         | MM R | 0.5431      | 2303.92505   | 70.69916     | 33.7576 |

**(-)-((2-methoxyphenyl)(4-nitrophenyl)methyl)dimethyl(phenyl)silane (P34)**

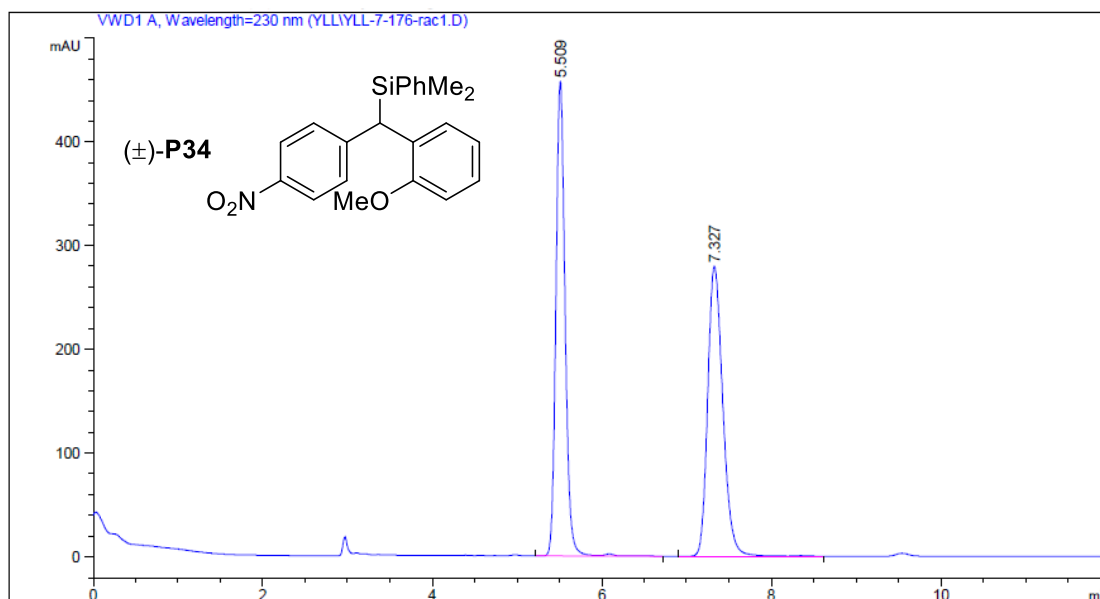

| Peak # | RetTime [min] | Type | Width [min] | Area [mAU*s] | Height [mAU] | Area %  |
|--------|---------------|------|-------------|--------------|--------------|---------|
| 1      | 5.509         | BV R | 0.1154      | 3442.39453   | 457.50986    | 49.8911 |
| 2      | 7.327         | BV R | 0.1913      | 3457.41748   | 279.46399    | 50.1089 |

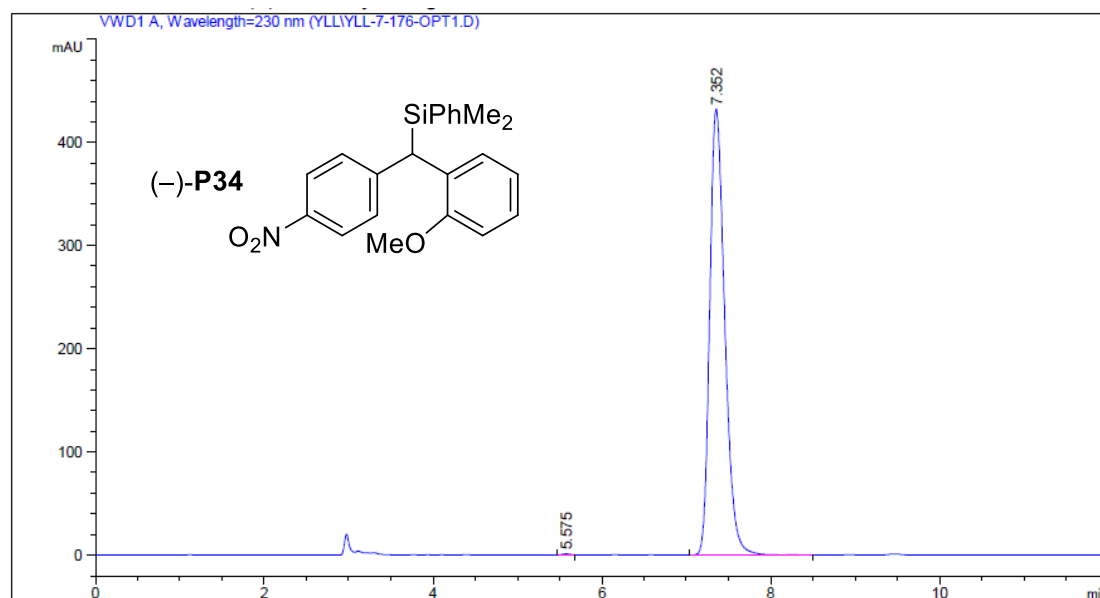

| Peak # | RetTime [min] | Type | Width [min] | Area [mAU*s] | Height [mAU] | Area %  |
|--------|---------------|------|-------------|--------------|--------------|---------|
| 1      | 5.575         | MM R | 0.1152      | 8.24817      | 1.19348      | 0.1539  |
| 2      | 7.352         | BV R | 0.1914      | 5349.62695   | 432.19373    | 99.8461 |

**(-)-((3-methoxyphenyl)(4-nitrophenyl)methyl)dimethyl(phenyl)silane (P35)**

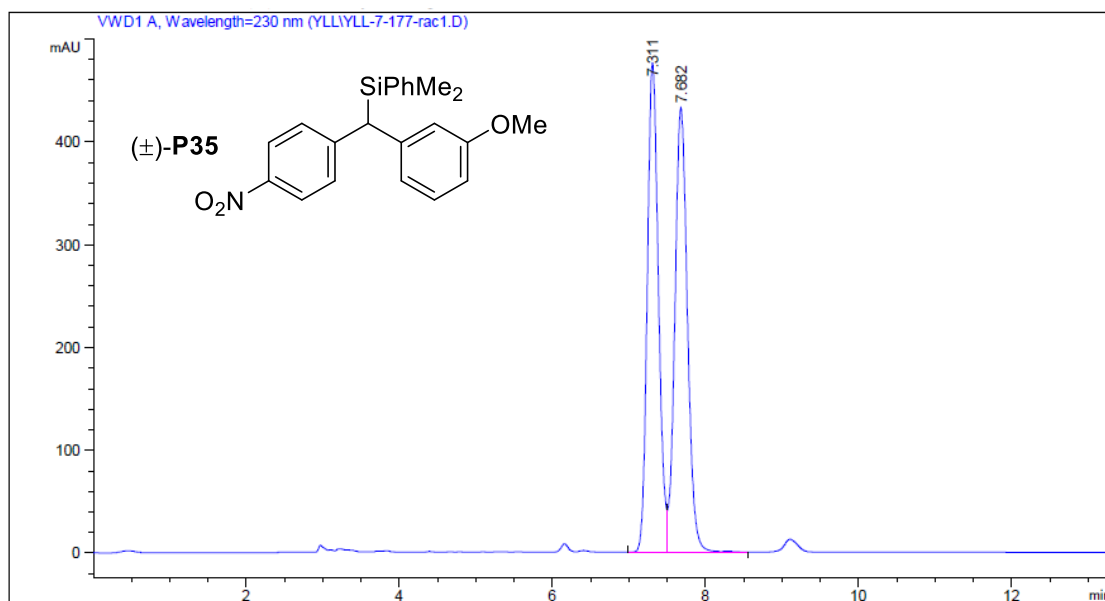

| Peak # | RetTime [min] | Type | Width [min] | Area [mAU*s] | Height [mAU] | Area %  |
|--------|---------------|------|-------------|--------------|--------------|---------|
| 1      | 7.311         | BV   | 0.1567      | 4798.25781   | 475.71945    | 49.3391 |
| 2      | 7.682         | W R  | 0.1759      | 4926.80518   | 432.35315    | 50.6609 |

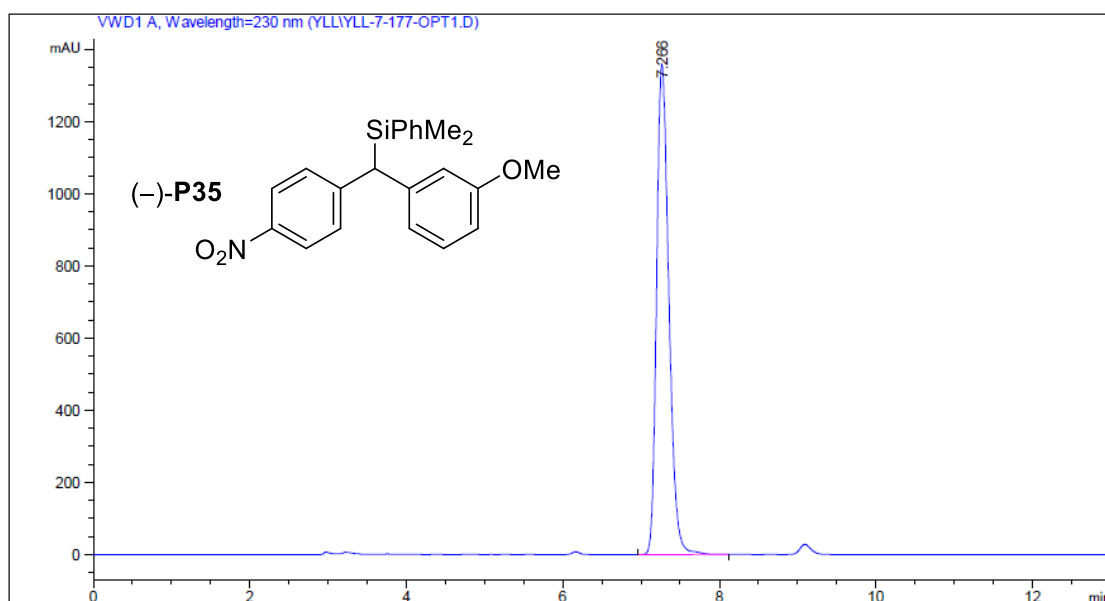

| Peak # | RetTime [min] | Type | Width [min] | Area [mAU*s] | Height [mAU] | Area %   |
|--------|---------------|------|-------------|--------------|--------------|----------|
| 1      | 7.266         | BB   | 0.1680      | 1.47855e4    | 1358.65503   | 100.0000 |

**(-)-(benzo[d][1,3]dioxol-5-yl(4-nitrophenyl)methyl)dimethyl(phenyl)silane (P36)**

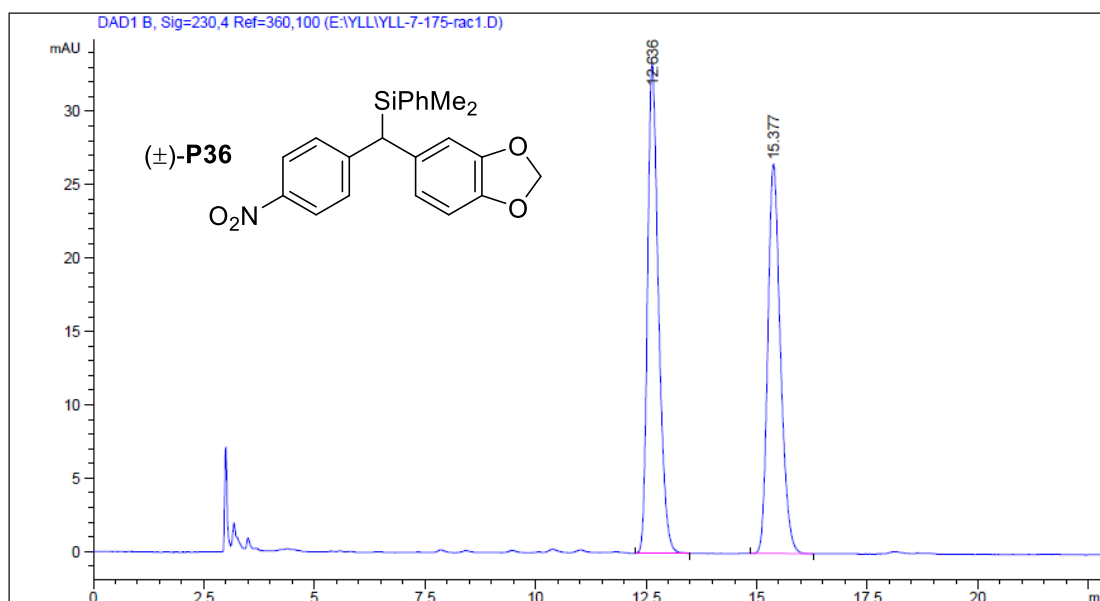

| Peak # | RetTime [min] | Type | Width [min] | Area [mAU*s] | Height [mAU] | Area %  |
|--------|---------------|------|-------------|--------------|--------------|---------|
| 1      | 12.636        | BB   | 0.2578      | 571.31885    | 33.36778     | 52.0230 |
| 2      | 15.377        | BB   | 0.3015      | 526.88531    | 26.55358     | 47.9770 |

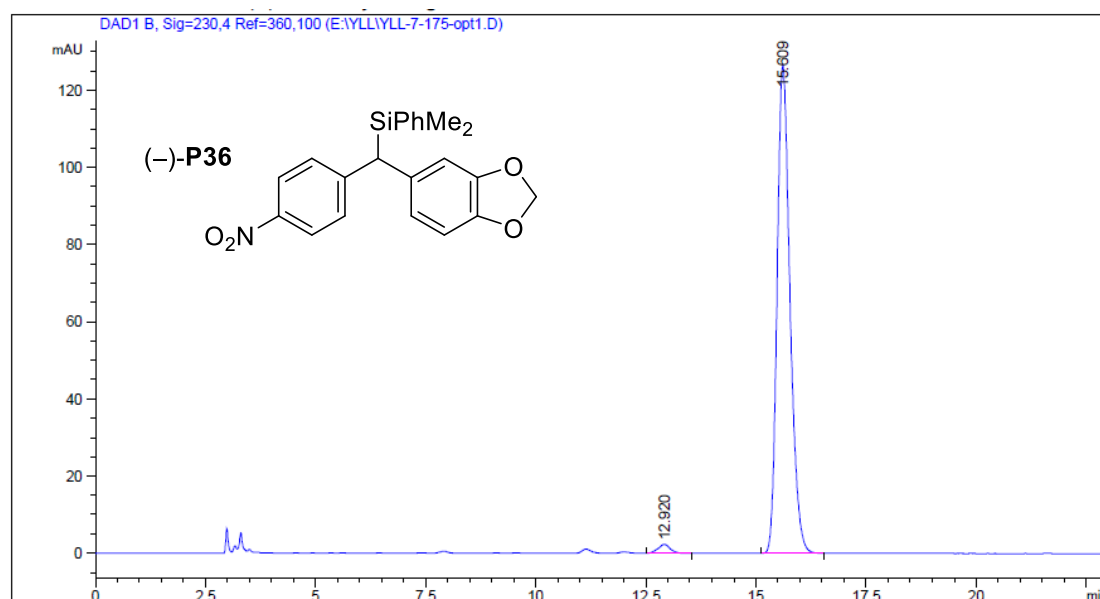

| Peak # | RetTime [min] | Type | Width [min] | Area [mAU*s] | Height [mAU] | Area %  |
|--------|---------------|------|-------------|--------------|--------------|---------|
| 1      | 12.920        | BB   | 0.2783      | 44.61031     | 2.32023      | 1.7066  |
| 2      | 15.609        | BB   | 0.3110      | 2569.42700   | 126.50528    | 98.2934 |

**(-)-(benzofuran-5-yl(4-(trifluoromethyl)phenyl)methyl)dimethyl(phenyl)silane (P37)**

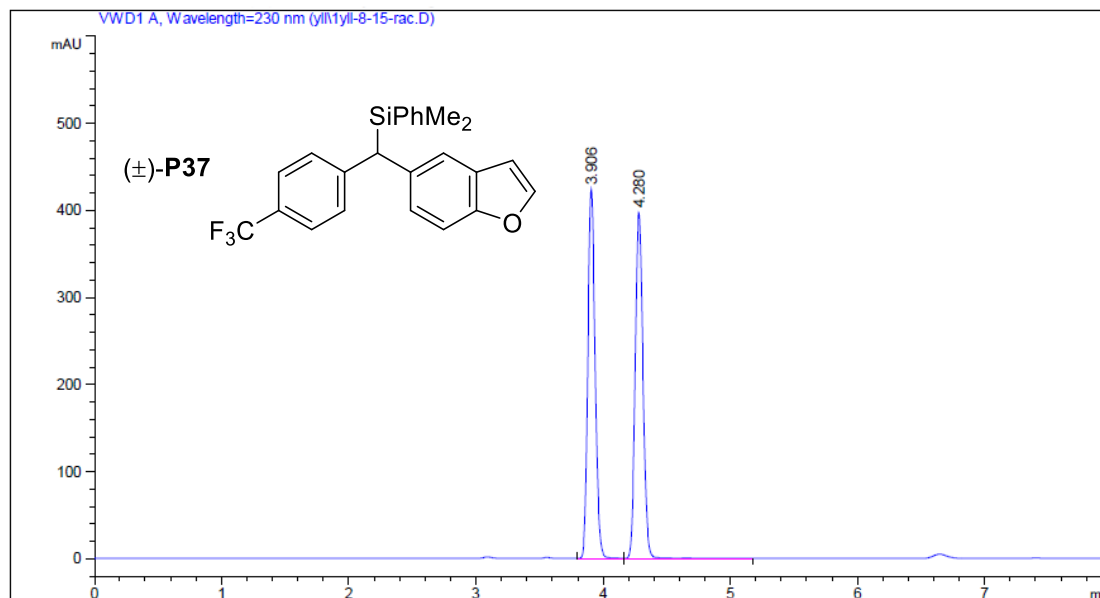

| Peak # | RetTime [min] | Type | Width [min] | Area [mAU*s] | Height [mAU] | Area %  |
|--------|---------------|------|-------------|--------------|--------------|---------|
| 1      | 3.906         | BB   | 0.0612      | 1680.84277   | 424.35303    | 49.8552 |
| 2      | 4.280         | BV R | 0.0656      | 1690.60938   | 397.66409    | 50.1448 |

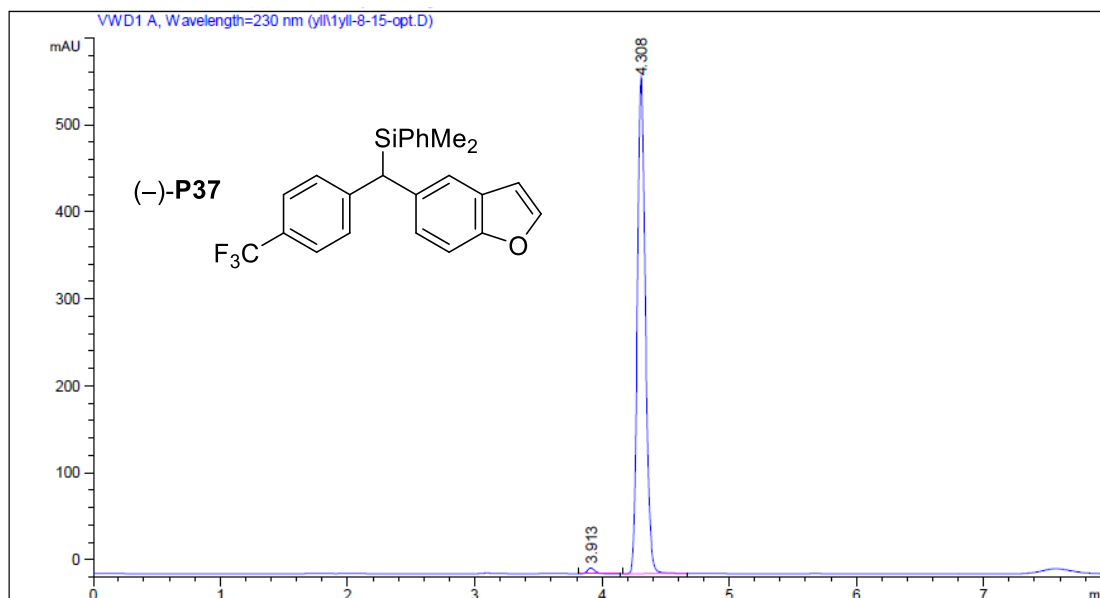

| Peak # | RetTime [min] | Type | Width [min] | Area [mAU*s] | Height [mAU] | Area %  |
|--------|---------------|------|-------------|--------------|--------------|---------|
| 1      | 3.913         | BB   | 0.0626      | 26.55536     | 6.51217      | 1.0468  |
| 2      | 4.308         | BB   | 0.0683      | 2510.27686   | 571.30750    | 98.9532 |

**(-)-5-((dimethyl(phenyl)silyl)(4-(trifluoromethyl)phenyl)methyl)-1H-indole (P38)**

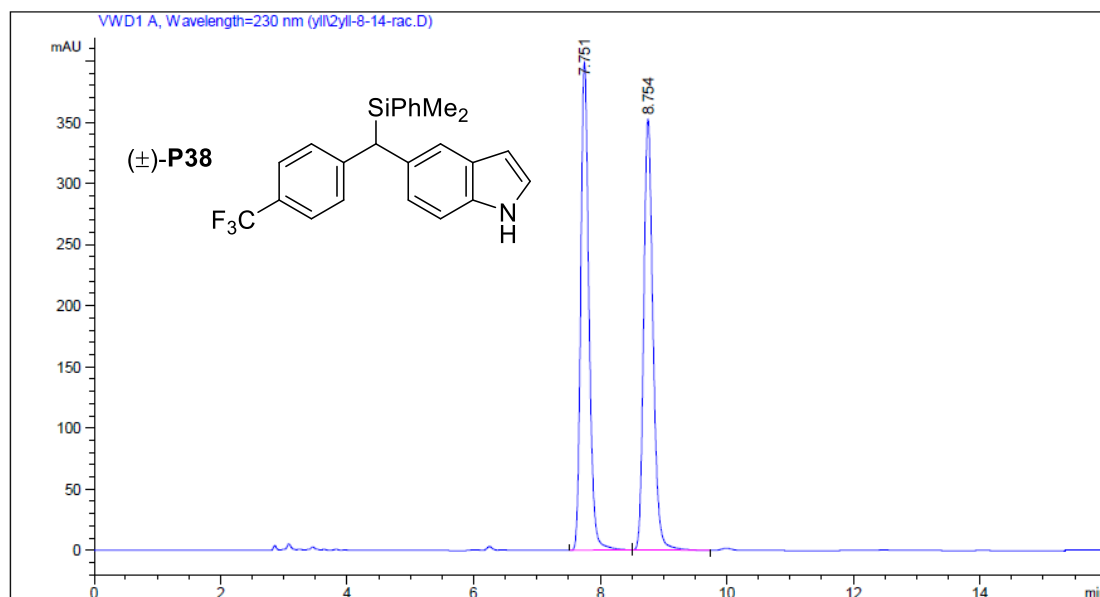

| Peak # | RetTime [min] | Type | Width [min] | Area [mAU*s] | Height [mAU] | Area %  |
|--------|---------------|------|-------------|--------------|--------------|---------|
| 1      | 7.751         | BB   | 0.1384      | 3603.27295   | 398.88898    | 49.9711 |
| 2      | 8.754         | BB   | 0.1564      | 3607.43628   | 352.39386    | 50.0289 |

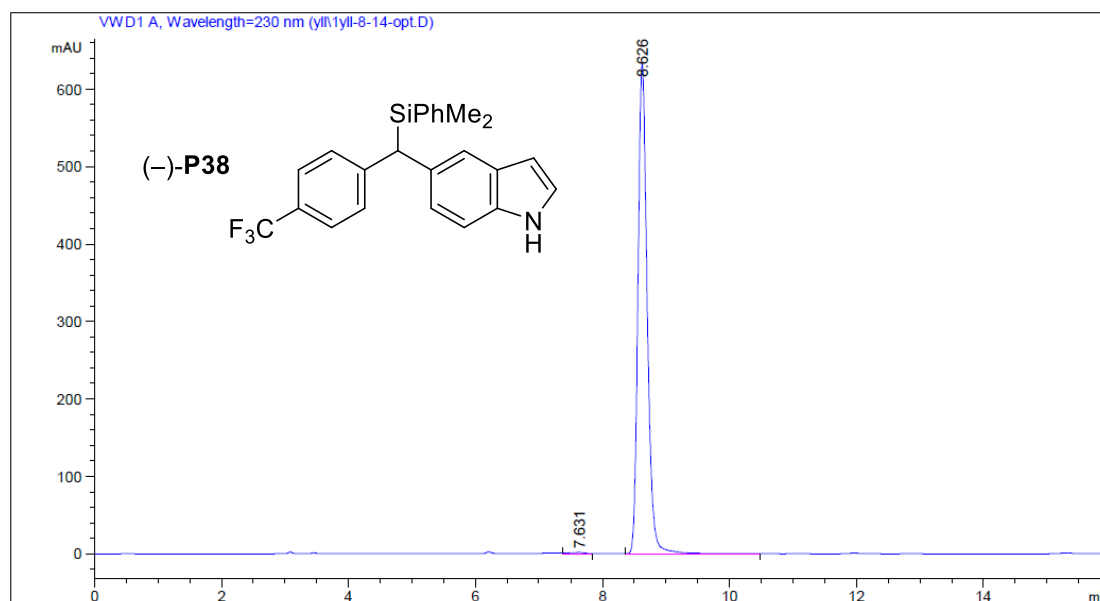

| Peak # | RetTime [min] | Type | Width [min] | Area [mAU*s] | Height [mAU] | Area %  |
|--------|---------------|------|-------------|--------------|--------------|---------|
| 1      | 7.631         | VV   | 0.2250      | 31.20424     | 1.88625      | 0.4846  |
| 2      | 8.626         | BB   | 0.1541      | 6408.09033   | 632.78662    | 99.5154 |



**(+)-((2-chlorophenyl)(phenyl)methyl)dimethyl(phenyl)silane (P39)**

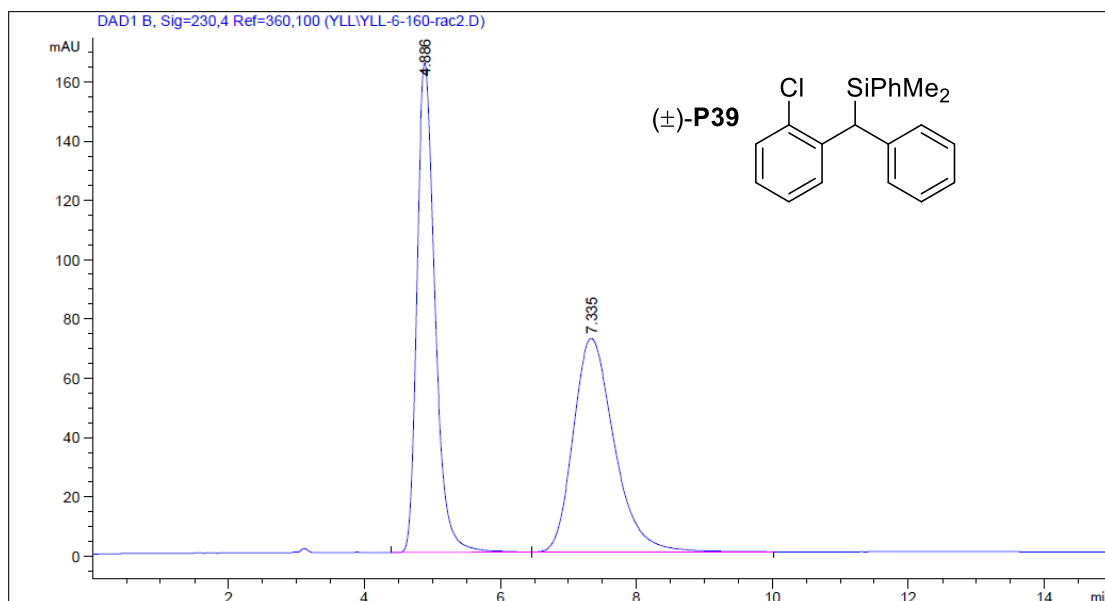

| Peak # | RetTime [min] | Type | Width [min] | Area [mAU*s] | Height [mAU] | Area %  |
|--------|---------------|------|-------------|--------------|--------------|---------|
| 1      | 4.886         | BB   | 0.2820      | 3030.58008   | 165.19821    | 50.1470 |
| 2      | 7.335         | BB   | 0.6439      | 3012.80908   | 72.04922     | 49.8530 |

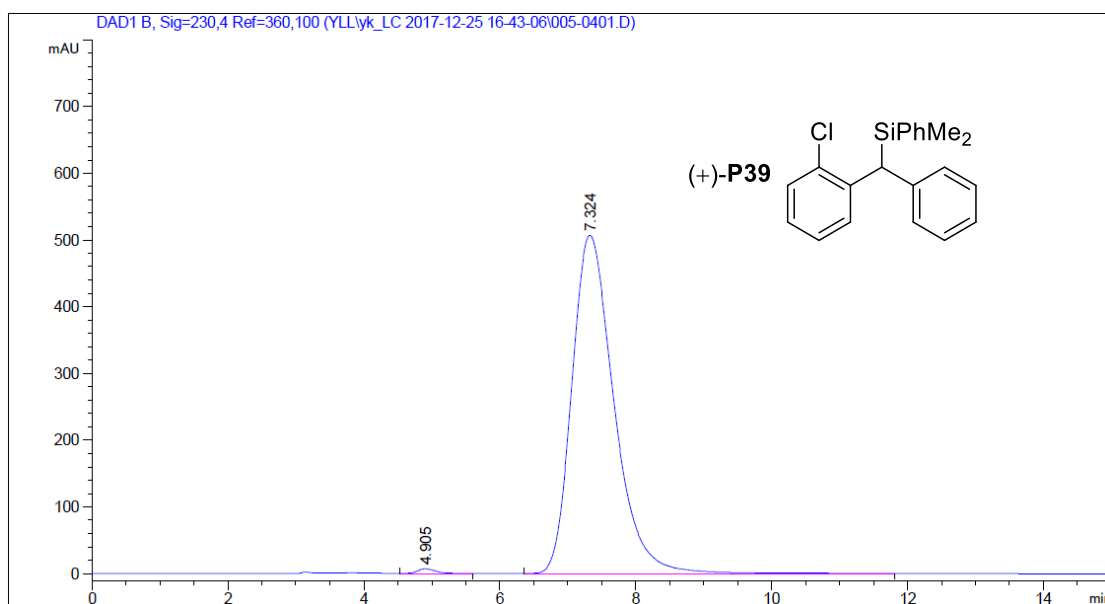

| Peak # | RetTime [min] | Type | Width [min] | Area [mAU*s] | Height [mAU] | Area %  |
|--------|---------------|------|-------------|--------------|--------------|---------|
| 1      | 4.905         | BB   | 0.2906      | 126.85776    | 6.77139      | 0.5797  |
| 2      | 7.324         | BB   | 0.6587      | 2.17549e4    | 506.89182    | 99.4203 |

**(+)-((2-bromophenyl)(phenyl)methyl)dimethyl(phenyl)silane (P40)**

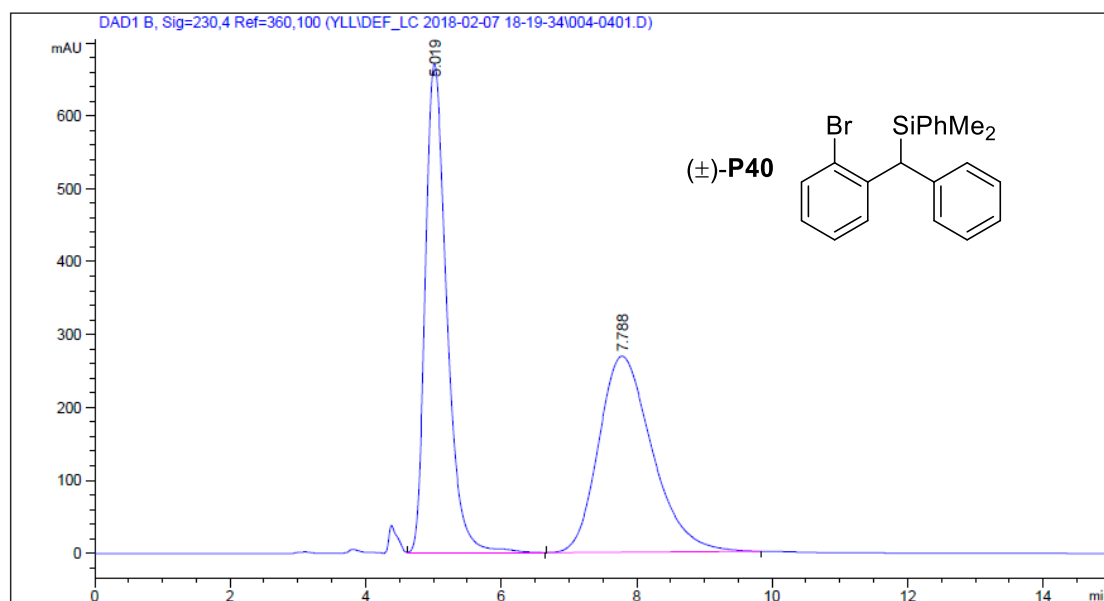

| Peak # | RetTime [min] | Type | Width [min] | Area [mAU*s] | Height [mAU] | Area %  |
|--------|---------------|------|-------------|--------------|--------------|---------|
| 1      | 5.019         | VB   | 0.3358      | 1.47142e4    | 670.96149    | 49.9892 |
| 2      | 7.788         | BB   | 0.8426      | 1.47205e4    | 268.93268    | 50.0108 |

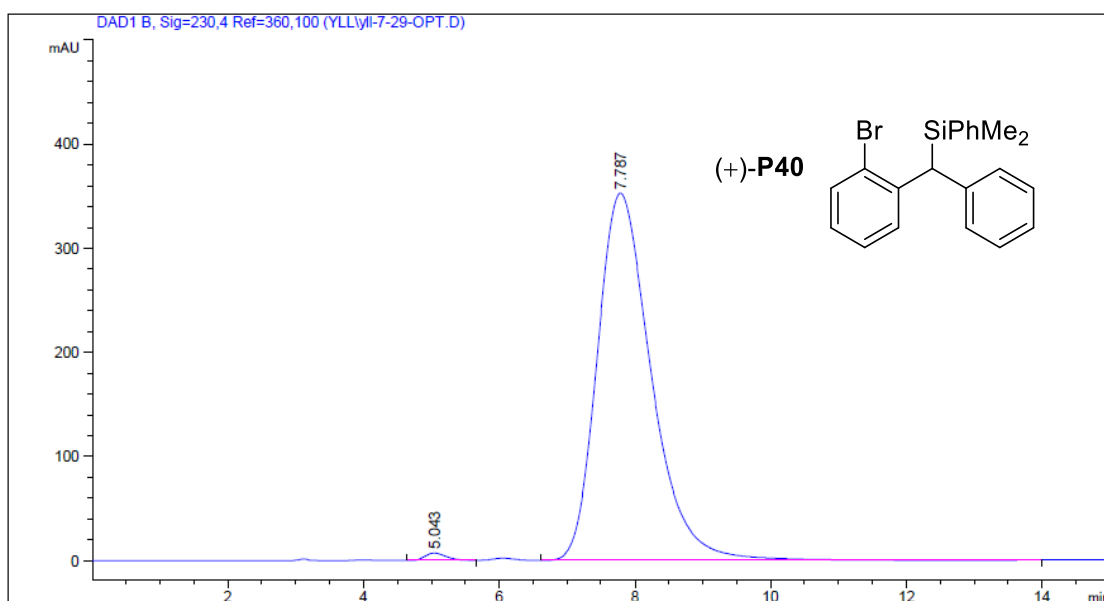

| Peak # | RetTime [min] | Type | Width [min] | Area [mAU*s] | Height [mAU] | Area %  |
|--------|---------------|------|-------------|--------------|--------------|---------|
| 1      | 5.043         | BB   | 0.3281      | 150.01660    | 7.05356      | 0.7617  |
| 2      | 7.787         | BB   | 0.8484      | 1.95446e4    | 352.74164    | 99.2383 |

**(+)-(2-fluorophenyl)(phenyl)methyl)dimethyl(phenyl)silane (P41)**

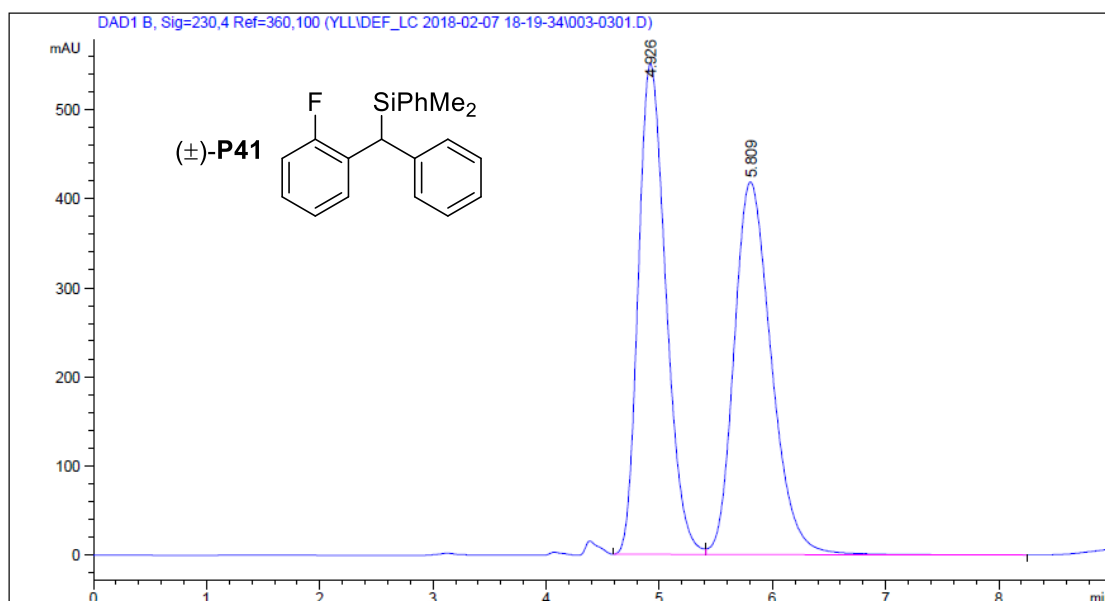

| Peak # | RetTime [min] | Type | Width [min] | Area [mAU*s] | Height [mAU] | Area %  |
|--------|---------------|------|-------------|--------------|--------------|---------|
| 1      | 4.926         | BV   | 0.2636      | 9324.99609   | 550.56226    | 49.4119 |
| 2      | 5.809         | VB   | 0.3523      | 9546.98633   | 418.22757    | 50.5881 |

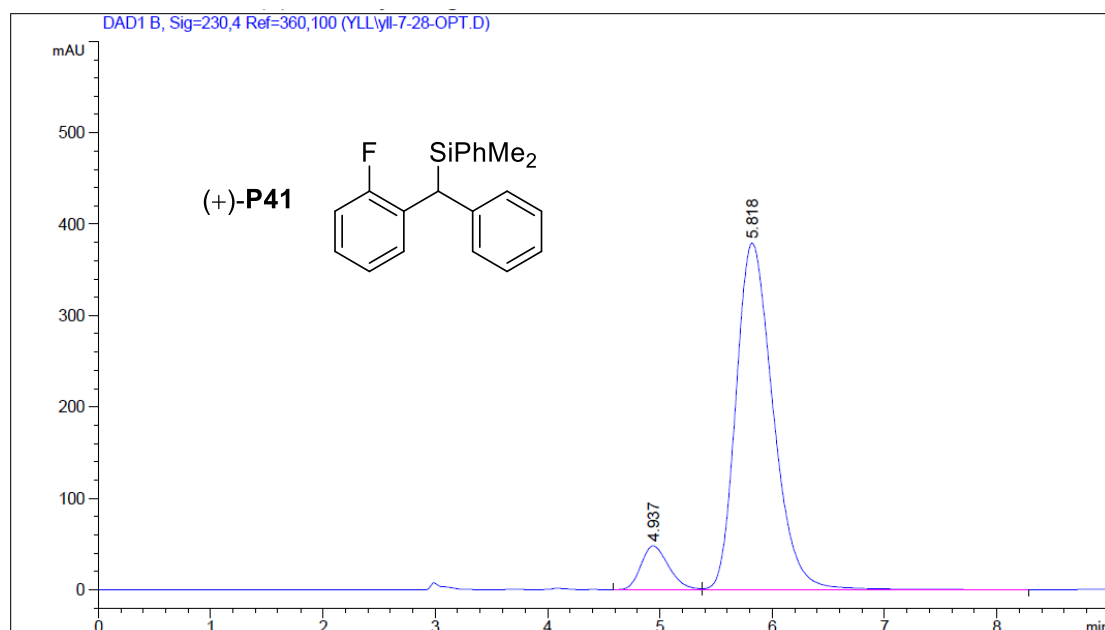

| Peak # | RetTime [min] | Type | Width [min] | Area [mAU*s] | Height [mAU] | Area %  |
|--------|---------------|------|-------------|--------------|--------------|---------|
| 1      | 4.937         | BV   | 0.2651      | 814.47949    | 47.73455     | 8.5900  |
| 2      | 5.818         | VB   | 0.3547      | 8667.27051   | 379.11499    | 91.4100 |

**(-)-((2-fluorophenyl)(4-methoxyphenyl)methyl)dimethyl(phenyl)silane (P42)**

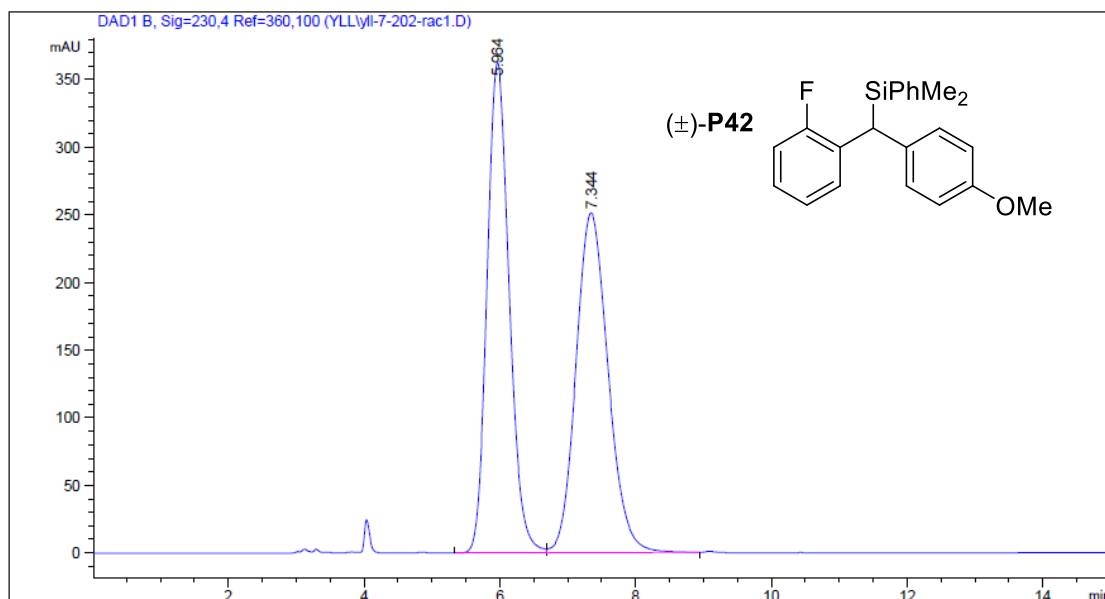

| Peak # | RetTime [min] | Type | Width [min] | Area [mAU*s] | Height [mAU] | Area %  |
|--------|---------------|------|-------------|--------------|--------------|---------|
| 1      | 5.964         | BV   | 0.3516      | 8189.85205   | 362.46072    | 49.8209 |
| 2      | 7.344         | VB   | 0.5072      | 8248.73535   | 251.15915    | 50.1791 |

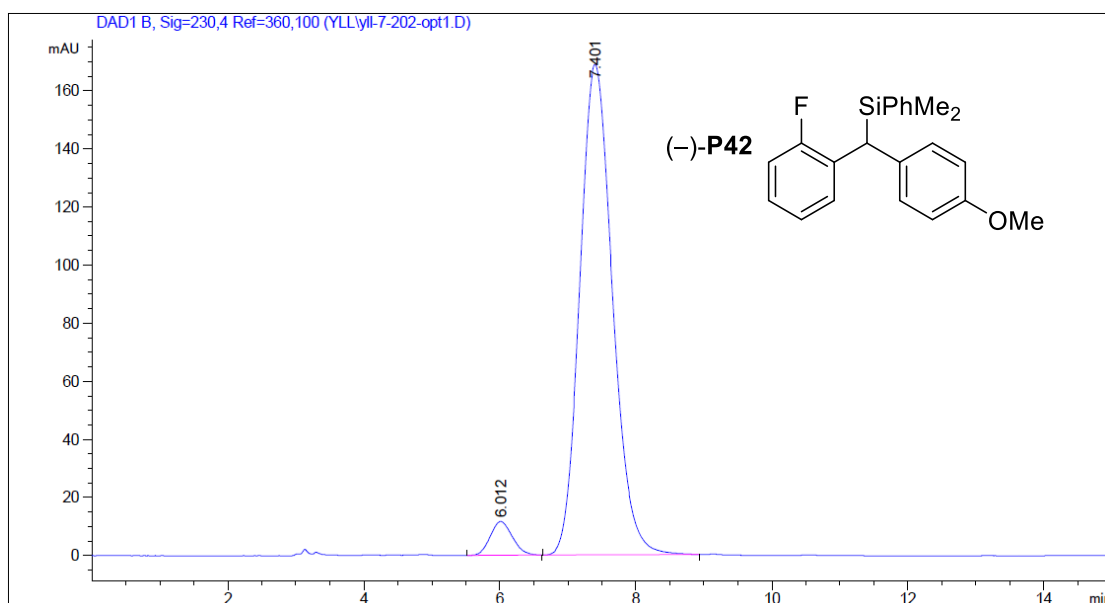

| Peak # | RetTime [min] | Type | Width [min] | Area [mAU*s] | Height [mAU] | Area %  |
|--------|---------------|------|-------------|--------------|--------------|---------|
| 1      | 6.012         | BB   | 0.3514      | 262.69489    | 11.63375     | 4.4591  |
| 2      | 7.401         | BB   | 0.5169      | 5628.56982   | 168.84630    | 95.5409 |

**(-)-ethoxydimethyl((4-nitrophenyl)(phenyl)methyl)silane (P43)**

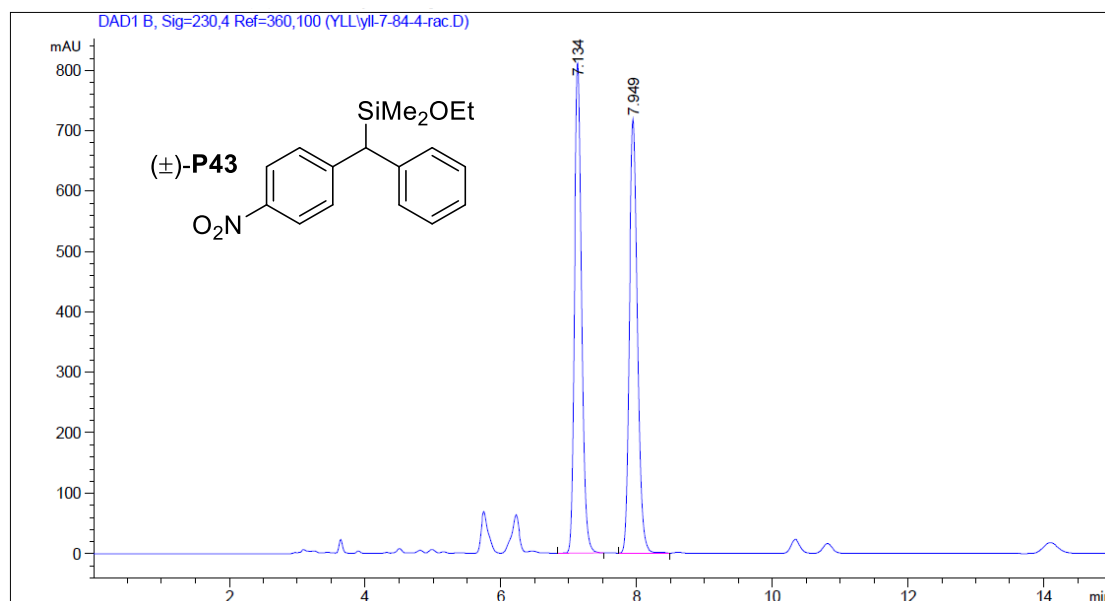

| Peak # | RetTime [min] | Type | Width [min] | Area [mAU*s] | Height [mAU] | Area %  |
|--------|---------------|------|-------------|--------------|--------------|---------|
| 1      | 7.134         | BB   | 0.1134      | 5948.02246   | 813.01306    | 49.8775 |
| 2      | 7.949         | BV R | 0.1268      | 5977.24170   | 718.74768    | 50.1225 |

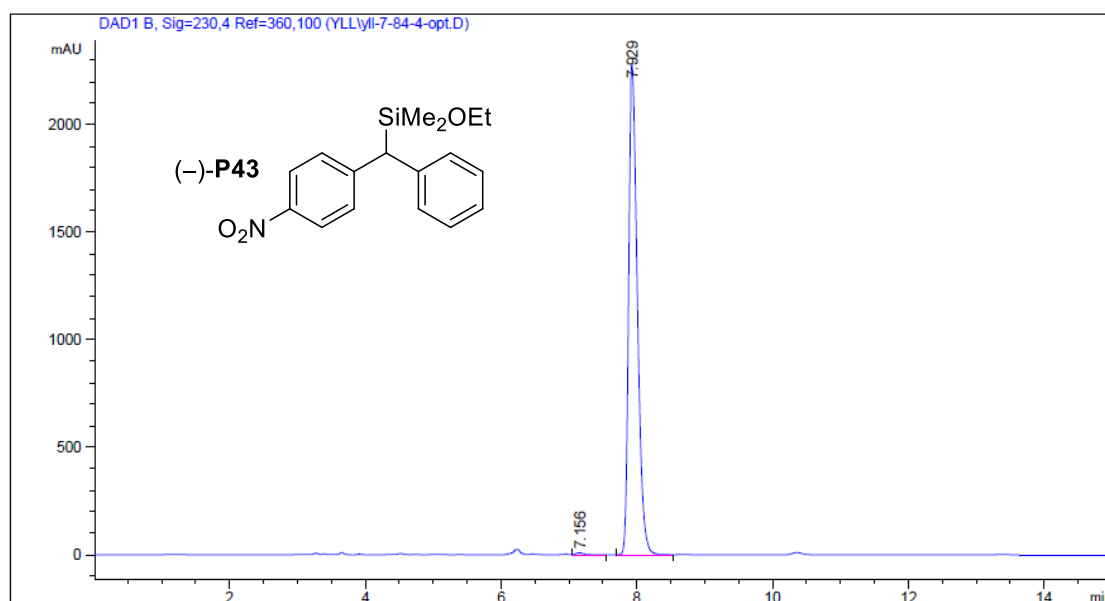

| Peak # | RetTime [min] | Type | Width [min] | Area [mAU*s] | Height [mAU] | Area %  |
|--------|---------------|------|-------------|--------------|--------------|---------|
| 1      | 7.156         | VB   | 0.1155      | 65.06393     | 8.67079      | 0.3149  |
| 2      | 7.929         | BB   | 0.1414      | 2.05963e4    | 2280.07861   | 99.6851 |

**(-)-dimethyl((4-nitrophenyl)(phenyl)methyl)silanol (P44)**

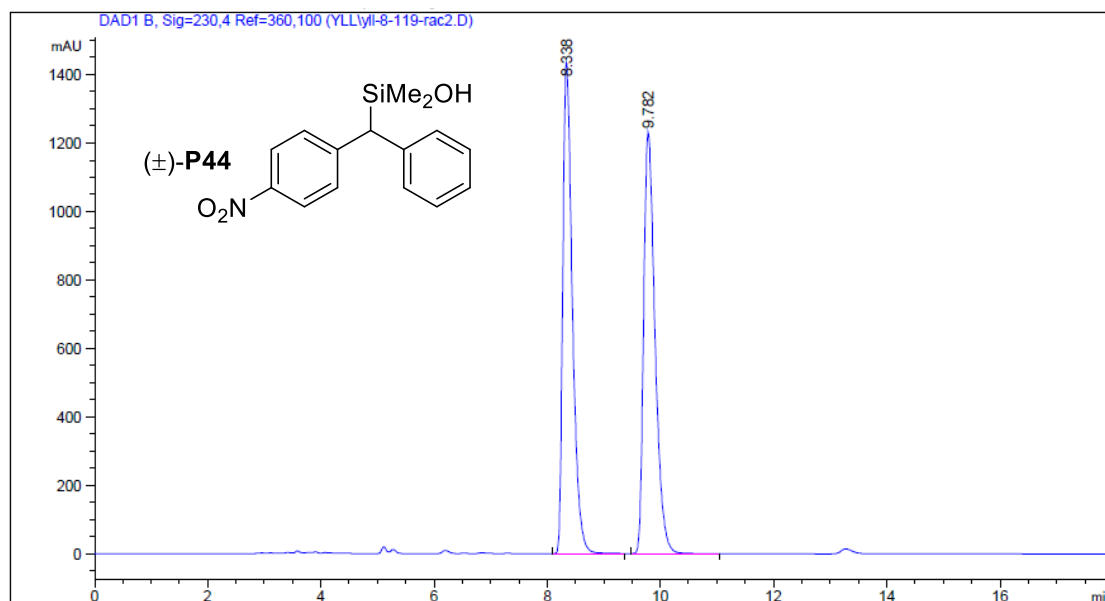

| Peak # | RetTime [min] | Type | Width [min] | Area [mAU*s] | Height [mAU] | Area %  |
|--------|---------------|------|-------------|--------------|--------------|---------|
| 1      | 8.338         | BB   | 0.1791      | 1.68506e4    | 1434.42700   | 49.5677 |
| 2      | 9.782         | BB   | 0.2125      | 1.71445e4    | 1230.78857   | 50.4323 |

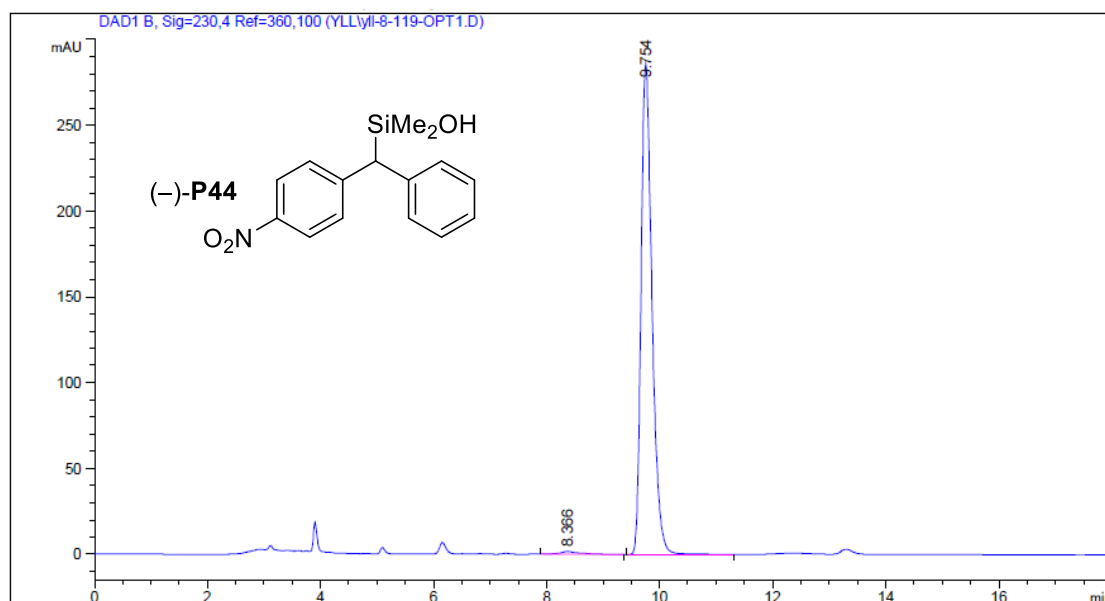

| Peak # | RetTime [min] | Type | Width [min] | Area [mAU*s] | Height [mAU] | Area %  |
|--------|---------------|------|-------------|--------------|--------------|---------|
| 1      | 8.366         | BB   | 0.3299      | 40.96298     | 1.67182      | 1.0580  |
| 2      | 9.754         | BB   | 0.2043      | 3830.69189   | 285.99307    | 98.9420 |

**(-)-triethyl((4-nitrophenyl)(phenyl)methyl)silane (P45)**

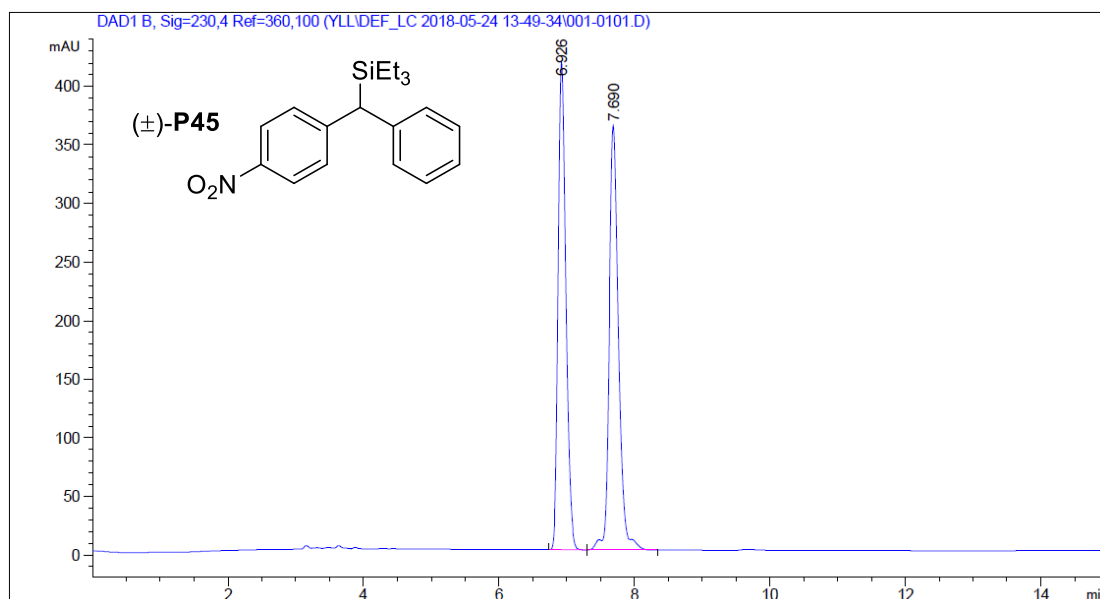

| Peak # | RetTime [min] | Type | Width [min] | Area [mAU*s] | Height [mAU] | Area %  |
|--------|---------------|------|-------------|--------------|--------------|---------|
| 1      | 6.926         | BB   | 0.1202      | 3285.98608   | 415.79910    | 48.8113 |
| 2      | 7.690         | VB R | 0.1414      | 3446.03125   | 362.25903    | 51.1887 |

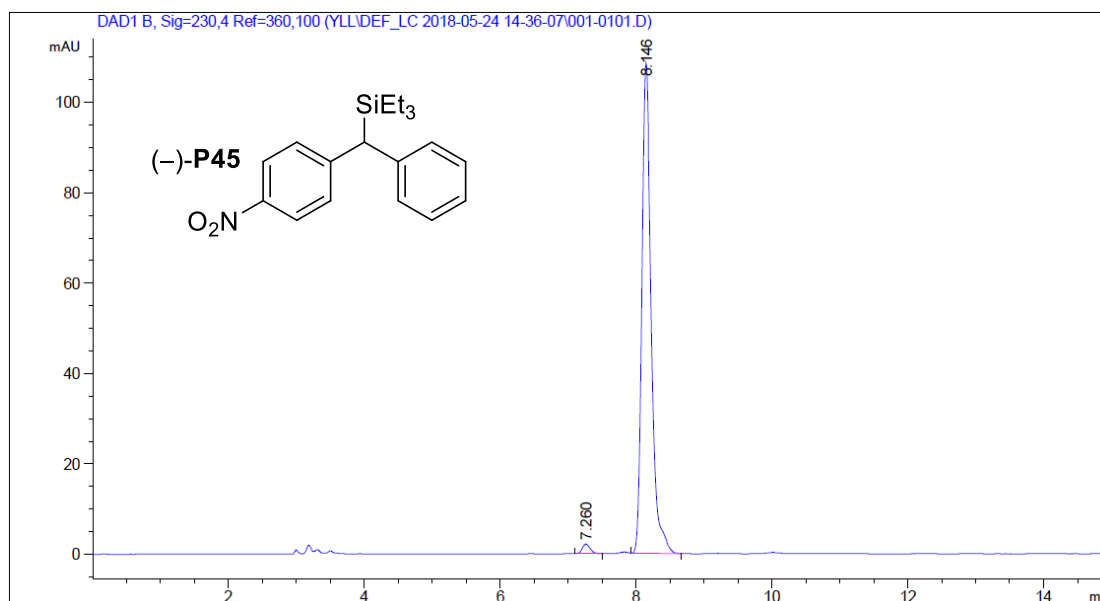

| Peak # | RetTime [min] | Type | Width [min] | Area [mAU*s] | Height [mAU] | Area %  |
|--------|---------------|------|-------------|--------------|--------------|---------|
| 1      | 7.260         | BB   | 0.1235      | 17.13815     | 2.13925      | 1.6231  |
| 2      | 8.146         | BB   | 0.1457      | 1038.77844   | 108.49282    | 98.3769 |

**(-)-methyl((4-nitrophenyl)(phenyl)methyl)diphenylsilane (P46)**

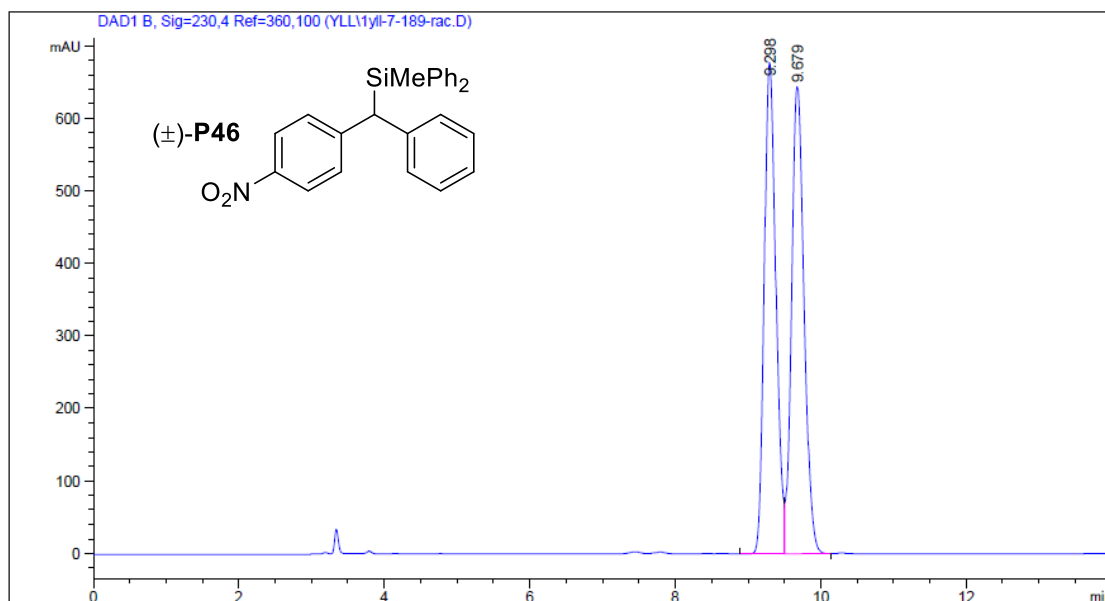

| Peak # | RetTime [min] | Type | Width [min] | Area [mAU*s] | Height [mAU] | Area %  |
|--------|---------------|------|-------------|--------------|--------------|---------|
| 1      | 9.298         | BV   | 0.1722      | 7561.35645   | 677.59052    | 49.5505 |
| 2      | 9.679         | VB   | 0.1834      | 7698.55176   | 644.09003    | 50.4495 |

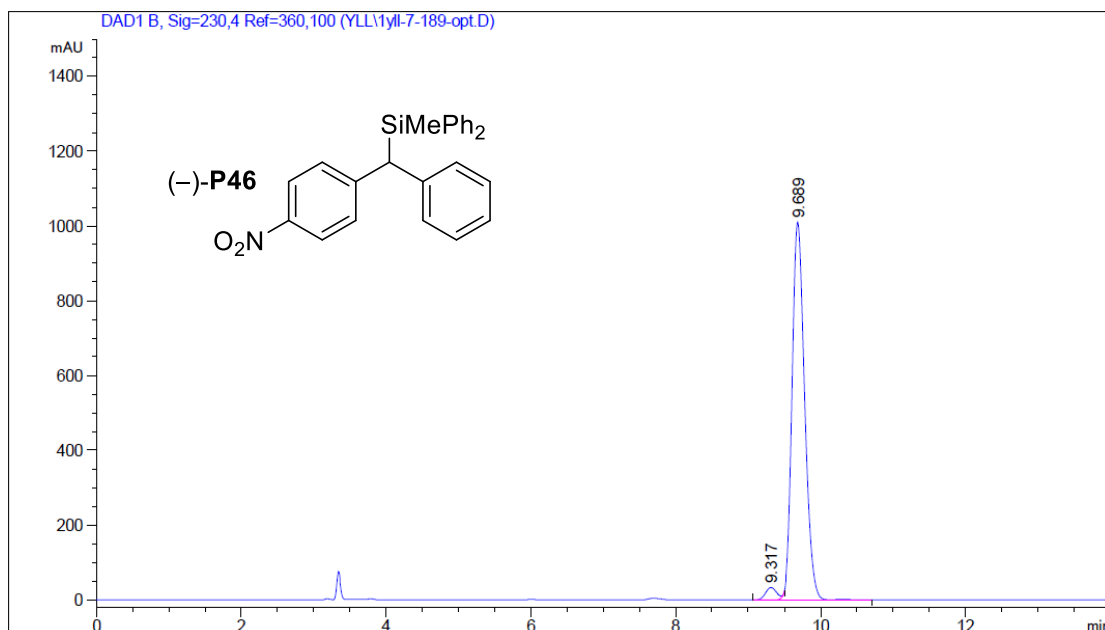

| Peak # | RetTime [min] | Type | Width [min] | Area [mAU*s] | Height [mAU] | Area %  |
|--------|---------------|------|-------------|--------------|--------------|---------|
| 1      | 9.317         | BV E | 0.1645      | 346.02747    | 32.94694     | 2.7699  |
| 2      | 9.689         | VV R | 0.1860      | 1.21463e4    | 1009.95319   | 97.2301 |



### (S)-dimethyl((4-nitrophenyl)(phenyl)methyl)(phenylethynyl)silane (P47)

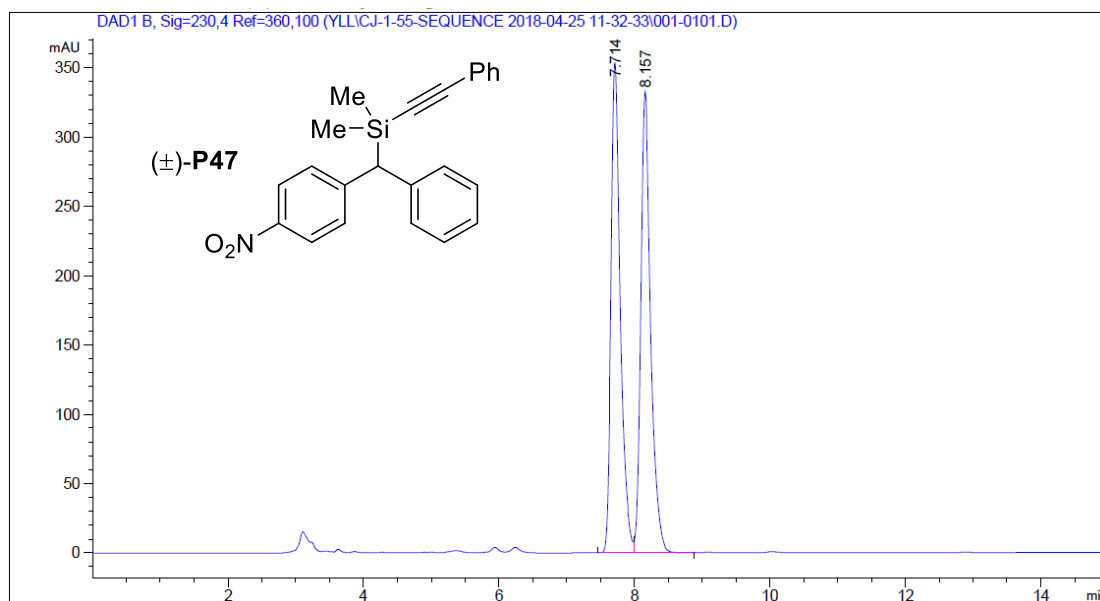

| Peak # | RetTime [min] | Type | Width [min] | Area [mAU*s] | Height [mAU] | Area %  |
|--------|---------------|------|-------------|--------------|--------------|---------|
| 1      | 7.714         | BV   | 0.1424      | 3348.23242   | 353.75223    | 49.7646 |
| 2      | 8.157         | VB   | 0.1526      | 3379.90283   | 332.56125    | 50.2354 |

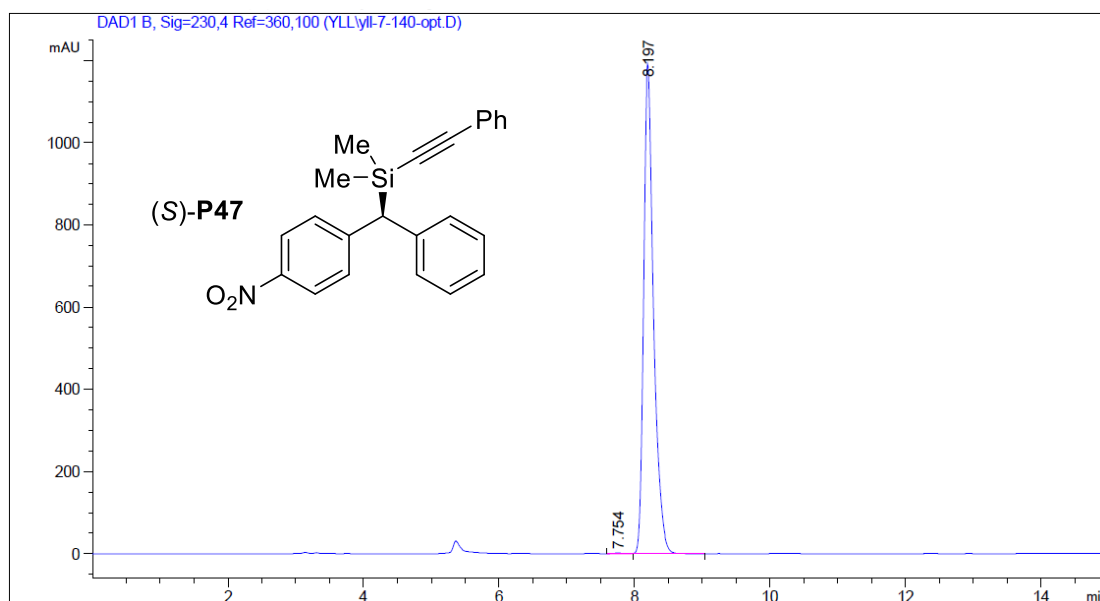

| Peak # | RetTime [min] | Type | Width [min] | Area [mAU*s] | Height [mAU] | Area %  |
|--------|---------------|------|-------------|--------------|--------------|---------|
| 1      | 7.754         | BV E | 0.1407      | 14.67232     | 1.57428      | 0.1201  |
| 2      | 8.197         | VB R | 0.1534      | 1.22005e4    | 1191.80066   | 99.8799 |

**(-)-(3-chloropropyl)dimethyl((4-nitrophenyl)(phenyl)methyl)silane (P48)**

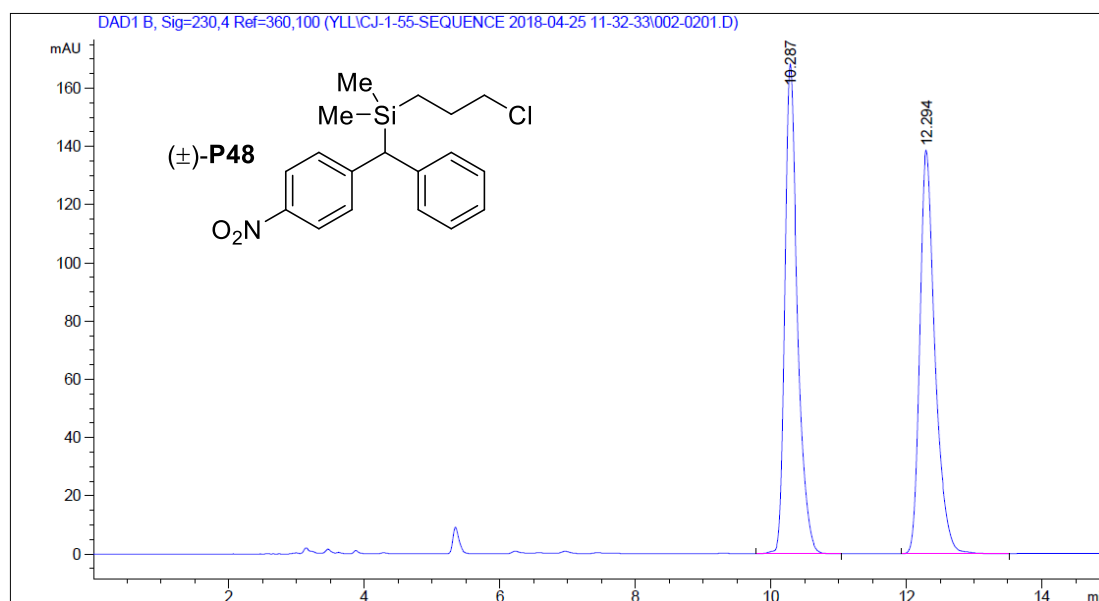

| Peak # | RetTime [min] | Type | Width [min] | Area [mAU*s] | Height [mAU] | Area %  |
|--------|---------------|------|-------------|--------------|--------------|---------|
| 1      | 10.287        | BB   | 0.1917      | 2158.41650   | 168.17952    | 49.9793 |
| 2      | 12.294        | BB   | 0.2338      | 2160.20557   | 138.59587    | 50.0207 |

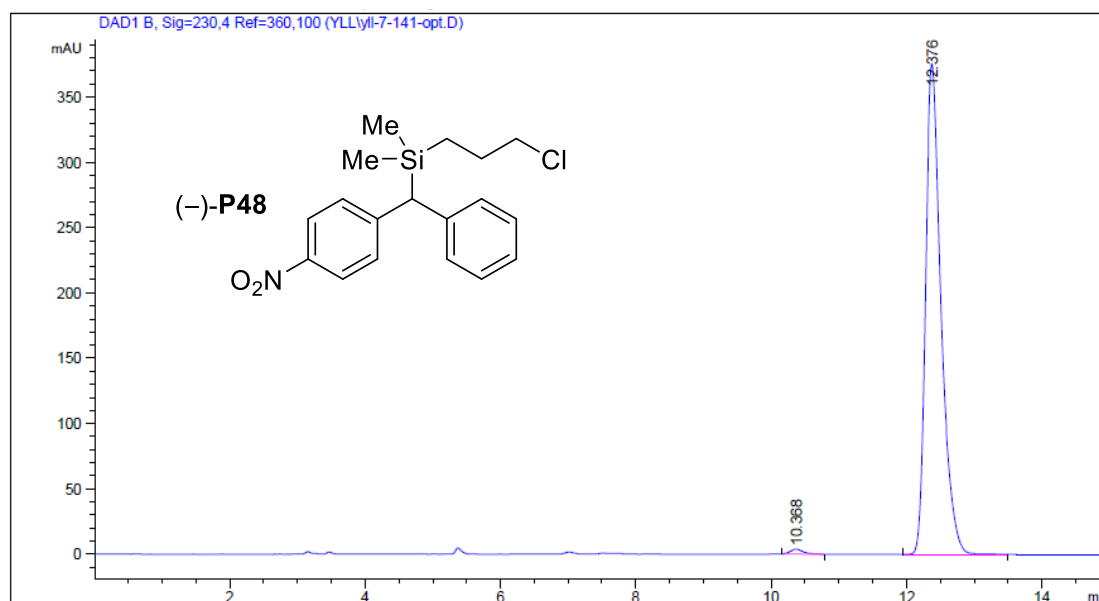

| Peak # | RetTime [min] | Type | Width [min] | Area [mAU*s] | Height [mAU] | Area %  |
|--------|---------------|------|-------------|--------------|--------------|---------|
| 1      | 10.368        | BB   | 0.1870      | 45.44220     | 3.65537      | 0.7593  |
| 2      | 12.376        | BB   | 0.2386      | 5939.28223   | 375.29282    | 99.2407 |

**(-)-5-(dimethyl((4-nitrophenyl)(phenyl)methyl)silyl)-1-methyl-1H-indole (P49)**

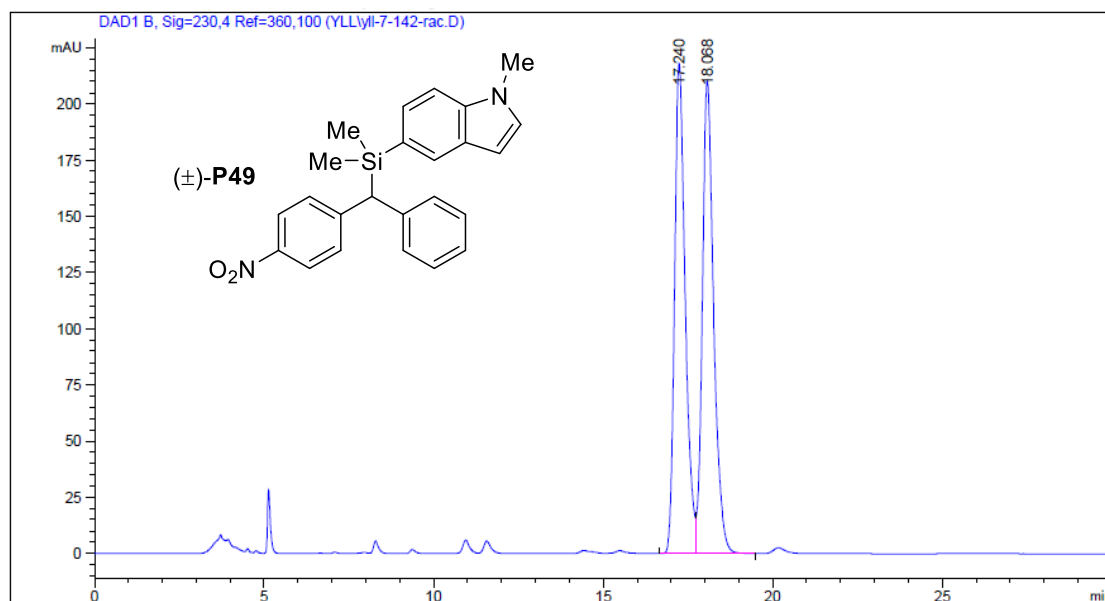

| Peak # | RetTime [min] | Type | Width [min] | Area [mAU*s] | Height [mAU] | Area %  |
|--------|---------------|------|-------------|--------------|--------------|---------|
| 1      | 17.240        | BV   | 0.3287      | 4762.49121   | 218.17859    | 49.3869 |
| 2      | 18.068        | VB   | 0.3486      | 4880.74023   | 210.43614    | 50.6131 |

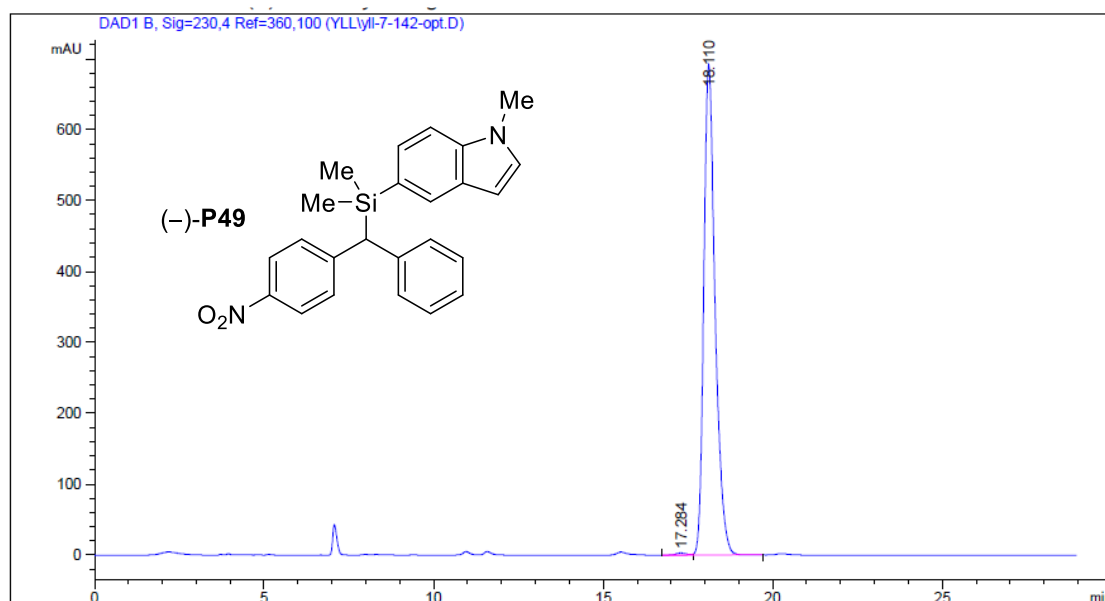

| Peak # | RetTime [min] | Type | Width [min] | Area [mAU*s] | Height [mAU] | Area %  |
|--------|---------------|------|-------------|--------------|--------------|---------|
| 1      | 17.284        | BV E | 0.3091      | 58.51109     | 2.78512      | 0.3637  |
| 2      | 18.110        | VB R | 0.3484      | 1.60278e4    | 691.61871    | 99.6363 |

## 12. Computational details

### Dirhodium-Tetraformate Catalyst

Conformations of each species were generated using Maestro with the OPLS3 force field. Conformational searches were conducted by restraining the position of the rhodium and rhodium-bound atoms. Geometry optimizations and frequency calculations were performed with Gaussian09 at the B3LYP-D3/6-31G(d)-LANL2DZ(Rh,I) level of theory before single point energy corrections at the M06/6-311++G(d,p)-SDD(Rh,I)/SMD(DCM) level of theory. Free energies were corrected with Truhlar's rigid-rotor harmonic oscillator treatment<sup>23,24</sup> through Goodvibes<sup>25</sup>.

### Computed Energies (Hartree)

| Structure                  | Electronic Energy | Zero Point Energy | Enthalpy   | Free Energy | Quazi-Harmonic Free Energy |
|----------------------------|-------------------|-------------------|------------|-------------|----------------------------|
| TS-1 (R=Br)                | -4653.6958        | 0.454312          | -4653.2026 | -4653.313   | -4653.3048                 |
| TS-2 (R=Br)                | -4653.6959        | 0.45421           | -4653.2026 | -4653.3141  | -4653.3049                 |
| TS-1 (R=CF <sub>3</sub> )  | -2417.3084        | 0.469088          | -2416.7981 | -2416.9143  | -2416.9041                 |
| TS-2 (R=CF <sub>3</sub> )  | -2417.3105        | 0.469279          | -2416.8    | -2416.9162  | -2416.9059                 |
| TS-1 (R=Cl)                | -2539.8707        | 0.454748          | -2539.3773 | -2539.4866  | -2539.4786                 |
| TS-2 (R=Cl)                | -2539.8701        | 0.454802          | -2539.3767 | -2539.4869  | -2539.4778                 |
| TS-1 (R=CN)                | -2172.4855        | 0.463051          | -2171.9833 | -2172.0937  | -2172.0857                 |
| TS-2 (R=CN)                | -2172.4885        | 0.462981          | -2171.9862 | -2172.0972  | -2172.0887                 |
| TS-1 (R=F)                 | -2179.5172        | 0.456153          | -2179.0229 | -2179.1306  | -2179.1232                 |
| TS-2 (R=F)                 | -2179.5162        | 0.456112          | -2179.0218 | -2179.1299  | -2179.1221                 |
| TS-1 (R=I)                 | -2091.0628        | 0.453815          | -2090.5699 | -2090.681   | -2090.6728                 |
| TS-2 (R=I)                 | -2091.0615        | 0.453516          | -2090.5687 | -2090.681   | -2090.6721                 |
| TS-1 (R=Me)                | -2119.5715        | 0.491766          | -2119.0405 | -2119.1513  | -2119.1428                 |
| TS-2 (R=Me)                | -2119.5704        | 0.491862          | -2119.0393 | -2119.1503  | -2119.1416                 |
| TS-1 (R=NMe <sub>2</sub> ) | -2214.1929        | 0.537649          | -2213.6134 | -2213.7297  | -2213.7206                 |
| TS-2 (R=NMe <sub>2</sub> ) | -2214.1878        | 0.537483          | -2213.6084 | -2213.7247  | -2213.7158                 |
| TS-1 (R=NO <sub>2</sub> )  | -2284.744         | 0.467082          | -2284.2369 | -2284.3494  | -2284.3407                 |
| TS-2 (R=NO <sub>2</sub> )  | -2284.7474        | 0.467329          | -2284.2402 | -2284.3529  | -2284.3438                 |
| TS-1 (R=OCF <sub>3</sub> ) | -2492.52          | 0.473789          | -2492.0047 | -2492.1196  | -2492.1117                 |
| TS-2 (R=OCF <sub>3</sub> ) | -2492.5183        | 0.473769          | -2492.0027 | -2492.1201  | -2492.1099                 |
| TS-1 (R=OMe)               | -2194.7734        | 0.496911          | -2194.2364 | -2194.3487  | -2194.3403                 |
| TS-2 (R=OMe)               | -2194.7707        | 0.496603          | -2194.2341 | -2194.3462  | -2194.3378                 |
| TS-1 (R=SCF <sub>3</sub> ) | -2815.4781        | 0.470362          | -2814.9651 | -2815.083   | -2815.074                  |
| TS-2 (R=SCF <sub>3</sub> ) | -2815.4801        | 0.469987          | -2814.9673 | -2815.0878  | -2815.0762                 |

### Cartesian Coordinates

**TS-1 (R=Br)**

|    |          |          |          |
|----|----------|----------|----------|
| Rh | -3.93328 | -0.78749 | -0.34488 |
| Rh | -1.55776 | -0.22373 | 0.18343  |
| O  | -4.44838 | 0.17503  | 1.42185  |
| O  | -2.27301 | 0.67891  | 1.90977  |
| O  | -3.65253 | -2.55628 | 0.71237  |
| O  | -1.48797 | -2.02974 | 1.21823  |
| O  | -1.02775 | -1.15770 | -1.60970 |
| O  | -3.19732 | -1.69648 | -2.08145 |
| O  | -1.86192 | 1.53234  | -0.90381 |
| O  | -4.04080 | 1.02926  | -1.35812 |
| C  | 0.41693  | 0.26004  | 0.65212  |
| C  | 0.54676  | 1.41763  | 1.55495  |
| C  | 0.07745  | 2.70006  | 1.20812  |
| C  | 1.02512  | 1.21544  | 2.86772  |
| C  | 0.12234  | 3.74535  | 2.12196  |
| H  | -0.32964 | 2.85806  | 0.21787  |
| C  | 1.03116  | 2.25857  | 3.79239  |
| H  | 1.36025  | 0.22823  | 3.16816  |
| C  | 0.59520  | 3.53077  | 3.42087  |
| H  | -0.22318 | 4.73187  | 1.82460  |
| H  | 1.38698  | 2.07533  | 4.80258  |
| H  | 0.61803  | 4.34780  | 4.13680  |
| C  | 1.53577  | -0.70809 | 0.62724  |
| C  | 1.34567  | -2.04363 | 0.21783  |
| C  | 2.85629  | -0.28702 | 0.91083  |
| C  | 2.41622  | -2.92780 | 0.12508  |
| H  | 0.35246  | -2.38793 | -0.02643 |
| C  | 3.93606  | -1.15610 | 0.80389  |
| H  | 3.04051  | 0.74499  | 1.18614  |
| C  | 3.70480  | -2.47781 | 0.41577  |
| H  | 2.25561  | -3.95527 | -0.18171 |
| H  | 4.94419  | -0.81499 | 1.01242  |
| C  | -3.52611 | 0.67019  | 2.12363  |
| H  | -3.83775 | 1.16851  | 3.05418  |
| C  | -3.01190 | 1.74799  | -1.40800 |
| H  | -3.10217 | 2.69399  | -1.96421 |
| C  | -2.53190 | -2.75916 | 1.24550  |
| H  | -2.42396 | -3.69466 | 1.81550  |
| C  | -1.96358 | -1.66712 | -2.31272 |
| H  | -1.62919 | -2.14285 | -3.24817 |
| Si | 1.37909  | 1.31672  | -2.08093 |
| H  | 0.62597  | 0.91701  | -0.77247 |
| C  | 2.13922  | -0.27906 | -2.71288 |

|    |          |          |          |
|----|----------|----------|----------|
| H  | 1.34103  | -1.01555 | -2.84667 |
| H  | 2.64085  | -0.11937 | -3.67525 |
| H  | 2.86485  | -0.70004 | -2.01057 |
| C  | 0.11694  | 2.04769  | -3.26428 |
| H  | -0.34118 | 2.95376  | -2.85738 |
| H  | 0.58655  | 2.29320  | -4.22484 |
| H  | -0.68110 | 1.31939  | -3.43522 |
| C  | 2.64251  | 2.56137  | -1.48049 |
| C  | 2.26772  | 3.89272  | -1.21543 |
| C  | 3.96903  | 2.18278  | -1.19667 |
| C  | 3.17674  | 4.80851  | -0.68631 |
| H  | 1.25141  | 4.22107  | -1.42050 |
| C  | 4.88302  | 3.09584  | -0.66809 |
| H  | 4.29312  | 1.16264  | -1.38535 |
| C  | 4.48674  | 4.41000  | -0.40920 |
| H  | 2.86417  | 5.83010  | -0.48693 |
| H  | 5.90285  | 2.78320  | -0.45889 |
| H  | 5.19588  | 5.12118  | 0.00609  |
| Br | 5.17718  | -3.67961 | 0.26550  |

**TS-2 (R=Br)**

|    |          |          |          |
|----|----------|----------|----------|
| Rh | -3.76317 | 1.00933  | -0.51813 |
| Rh | -1.52215 | 0.15390  | 0.18734  |
| O  | -3.05732 | 2.91377  | -0.07470 |
| O  | -1.00963 | 2.12876  | 0.56902  |
| O  | -4.36650 | 0.77686  | 1.45791  |
| O  | -2.30520 | 0.04269  | 2.11202  |
| O  | -2.20971 | -1.76487 | -0.27700 |
| O  | -4.26114 | -0.98403 | -0.90938 |
| O  | -0.95243 | 0.36543  | -1.81356 |
| O  | -2.98683 | 1.18565  | -2.44243 |
| C  | 0.34986  | -0.53978 | 0.78269  |
| C  | 1.41980  | 0.46447  | 0.64988  |
| C  | 1.77697  | 1.03083  | -0.58934 |
| C  | 2.02204  | 0.98718  | 1.81382  |
| C  | 2.72511  | 2.04130  | -0.67299 |
| H  | 1.29569  | 0.67292  | -1.48972 |
| C  | 2.94514  | 2.02793  | 1.74354  |
| H  | 1.74236  | 0.59405  | 2.78531  |
| C  | 3.30362  | 2.53720  | 0.49739  |
| H  | 3.00965  | 2.45017  | -1.63624 |
| H  | 3.38851  | 2.43053  | 2.64742  |
| C  | 0.56913  | -1.63888 | 1.74609  |
| C  | -0.51117 | -2.35388 | 2.30491  |

|    |          |          |          |
|----|----------|----------|----------|
| C  | 1.88224  | -2.07157 | 2.05285  |
| C  | -0.28549 | -3.42881 | 3.16095  |
| H  | -1.52120 | -2.05811 | 2.06692  |
| C  | 2.10300  | -3.15731 | 2.89421  |
| H  | 2.72818  | -1.56926 | 1.59780  |
| C  | 1.01774  | -3.83585 | 3.45763  |
| H  | -1.13125 | -3.95886 | 3.58982  |
| H  | 3.11949  | -3.47735 | 3.10629  |
| C  | -1.87836 | 3.03219  | 0.35347  |
| H  | -1.54139 | 4.05639  | 0.57431  |
| C  | -1.79913 | 0.83047  | -2.64423 |
| H  | -1.42876 | 0.92540  | -3.67683 |
| C  | -3.52109 | 0.37383  | 2.29651  |
| H  | -3.86734 | 0.28895  | 3.33794  |
| C  | -3.40370 | -1.87993 | -0.71270 |
| H  | -3.71142 | -2.91160 | -0.94537 |
| Si | 0.91562  | -2.55422 | -1.49982 |
| H  | 0.49851  | -1.36837 | -0.58248 |
| C  | 0.31469  | -4.09767 | -0.61477 |
| H  | -0.76322 | -4.00803 | -0.44943 |
| H  | 0.50969  | -4.99572 | -1.21379 |
| H  | 0.78980  | -4.22205 | 0.36297  |
| C  | 0.09079  | -2.29159 | -3.16714 |
| H  | 0.43150  | -1.36960 | -3.64735 |
| H  | 0.29665  | -3.13349 | -3.83945 |
| H  | -0.99037 | -2.21030 | -3.02098 |
| C  | 2.78282  | -2.41161 | -1.55190 |
| C  | 3.41066  | -1.45189 | -2.36916 |
| C  | 3.59770  | -3.18977 | -0.70681 |
| C  | 4.79343  | -1.27153 | -2.34200 |
| H  | 2.81306  | -0.83190 | -3.03347 |
| C  | 4.98226  | -3.01497 | -0.67753 |
| H  | 3.14700  | -3.93624 | -0.05835 |
| C  | 5.58171  | -2.05240 | -1.49293 |
| H  | 5.25612  | -0.52163 | -2.97801 |
| H  | 5.59278  | -3.62771 | -0.01915 |
| H  | 6.65893  | -1.91099 | -1.46754 |
| H  | 1.18790  | -4.68225 | 4.11783  |
| Br | 4.60232  | 3.93276  | 0.38584  |

**TS-1 (R=CF3)**

|    |          |          |          |
|----|----------|----------|----------|
| Rh | -3.96278 | -0.69943 | -0.34293 |
| Rh | -1.57644 | -0.17551 | 0.17754  |
| O  | -4.47079 | 0.38240  | 1.35586  |

|    |          |          |          |
|----|----------|----------|----------|
| O  | -2.28742 | 0.86452  | 1.82831  |
| O  | -3.74731 | -2.40496 | 0.82581  |
| O  | -1.57728 | -1.90699 | 1.33554  |
| O  | -1.05651 | -1.25173 | -1.53448 |
| O  | -3.23892 | -1.73246 | -2.01158 |
| O  | -1.81149 | 1.50239  | -1.04152 |
| O  | -4.00675 | 1.05324  | -1.46937 |
| C  | 0.40083  | 0.29085  | 0.64918  |
| C  | 0.54881  | 1.49152  | 1.48969  |
| C  | 0.05837  | 2.75047  | 1.08600  |
| C  | 1.06451  | 1.36651  | 2.79781  |
| C  | 0.11998  | 3.84537  | 1.93805  |
| H  | -0.37756 | 2.84869  | 0.09960  |
| C  | 1.08826  | 2.46013  | 3.66228  |
| H  | 1.41624  | 0.40072  | 3.14478  |
| C  | 0.63220  | 3.70654  | 3.23282  |
| H  | -0.24510 | 4.81088  | 1.59790  |
| H  | 1.47359  | 2.33632  | 4.67058  |
| H  | 0.66807  | 4.56227  | 3.90144  |
| C  | 1.50543  | -0.69953 | 0.68276  |
| C  | 1.28449  | -2.05858 | 0.38609  |
| C  | 2.83560  | -0.27527 | 0.91218  |
| C  | 2.34503  | -2.95953 | 0.34351  |
| H  | 0.28035  | -2.40435 | 0.19478  |
| C  | 3.89643  | -1.16952 | 0.85063  |
| H  | 3.03659  | 0.77142  | 1.10549  |
| C  | 3.64976  | -2.51653 | 0.56950  |
| H  | 2.16192  | -4.00658 | 0.12765  |
| H  | 4.91208  | -0.82558 | 1.01720  |
| C  | -3.54189 | 0.90024  | 2.03174  |
| H  | -3.84756 | 1.46596  | 2.92496  |
| C  | -2.95141 | 1.72679  | -1.56535 |
| H  | -3.00316 | 2.63440  | -2.18649 |
| C  | -2.64203 | -2.60408 | 1.39110  |
| H  | -2.57038 | -3.50306 | 2.02212  |
| C  | -2.00094 | -1.76730 | -2.22075 |
| H  | -1.67165 | -2.31536 | -3.11751 |
| Si | 1.47399  | 1.17028  | -2.11499 |
| H  | 0.66866  | 0.87305  | -0.81158 |
| C  | 2.03860  | -0.50666 | -2.74165 |
| H  | 2.72171  | -0.99376 | -2.03877 |
| H  | 1.16335  | -1.15277 | -2.85555 |
| H  | 2.54516  | -0.41718 | -3.71053 |
| C  | 0.31195  | 2.06487  | -3.28977 |



|   |          |          |          |
|---|----------|----------|----------|
| H | -0.04162 | 3.00621  | -2.85786 |
| H | 0.81739  | 2.28503  | -4.23813 |
| H | -0.56244 | 1.43877  | -3.48851 |
| C | 2.89019  | 2.23790  | -1.51362 |
| C | 2.65342  | 3.54444  | -1.04402 |
| C | 4.20461  | 1.73836  | -1.43567 |
| C | 3.68382  | 4.31841  | -0.51058 |
| H | 1.65040  | 3.96135  | -1.08241 |
| C | 5.24100  | 2.51185  | -0.91029 |
| H | 4.42202  | 0.73069  | -1.77995 |
| C | 4.98028  | 3.80196  | -0.44217 |
| H | 3.47606  | 5.32072  | -0.14572 |
| H | 6.24910  | 2.10814  | -0.86311 |
| H | 5.78428  | 4.40318  | -0.02591 |
| C | 4.81183  | -3.46439 | 0.43758  |
| F | 4.44348  | -4.75005 | 0.61615  |
| F | 5.78538  | -3.18672 | 1.33327  |
| F | 5.37323  | -3.37557 | -0.79198 |

**TS-2 (R=CF3)**

|    |          |          |          |
|----|----------|----------|----------|
| Rh | -3.74901 | 0.95642  | -0.56219 |
| Rh | -1.50850 | 0.15496  | 0.19742  |
| O  | -3.10439 | 2.87663  | -0.09143 |
| O  | -1.05461 | 2.13930  | 0.60040  |
| O  | -4.39817 | 0.70025  | 1.39716  |
| O  | -2.33722 | 0.01121  | 2.09962  |
| O  | -2.13831 | -1.77845 | -0.28911 |
| O  | -4.19051 | -1.04506 | -0.97304 |
| O  | -0.89249 | 0.39082  | -1.78599 |
| O  | -2.93073 | 1.16206  | -2.46331 |
| C  | 0.35102  | -0.48940 | 0.83708  |
| C  | 1.41065  | 0.52401  | 0.69104  |
| C  | 1.83811  | 1.01046  | -0.55854 |
| C  | 1.93088  | 1.12577  | 1.85719  |
| C  | 2.78338  | 2.02311  | -0.64117 |
| H  | 1.41731  | 0.58987  | -1.46079 |
| C  | 2.84945  | 2.16708  | 1.77225  |
| H  | 1.58981  | 0.78805  | 2.82995  |
| C  | 3.29060  | 2.60738  | 0.52324  |
| H  | 3.12149  | 2.37318  | -1.61071 |
| H  | 3.22830  | 2.63389  | 2.67548  |
| C  | 0.58212  | -1.57752 | 1.80031  |
| C  | -0.48825 | -2.33968 | 2.31785  |
| C  | 1.90101  | -1.95321 | 2.15788  |

|                    |          |          |          |
|--------------------|----------|----------|----------|
| C                  | -0.24956 | -3.40532 | 3.18089  |
| H                  | -1.49980 | -2.08746 | 2.03976  |
| C                  | 2.13503  | -3.02900 | 3.00757  |
| H                  | 2.74103  | -1.41325 | 1.73608  |
| C                  | 1.05820  | -3.75497 | 3.52757  |
| H                  | -1.08689 | -3.97308 | 3.57650  |
| H                  | 3.15475  | -3.30514 | 3.26139  |
| H                  | 1.23935  | -4.59437 | 4.19371  |
| C                  | -1.93995 | 3.02251  | 0.36615  |
| H                  | -1.63349 | 4.05335  | 0.59957  |
| C                  | -1.72904 | 0.83839  | -2.63590 |
| H                  | -1.33497 | 0.94855  | -3.65801 |
| C                  | -3.56553 | 0.31168  | 2.25490  |
| H                  | -3.93582 | 0.21099  | 3.28651  |
| C                  | -3.31785 | -1.92118 | -0.75533 |
| H                  | -3.59472 | -2.95935 | -0.99709 |
| Si                 | 0.98162  | -2.54047 | -1.47326 |
| H                  | 0.53948  | -1.37235 | -0.57005 |
| C                  | 0.47208  | -4.10097 | -0.55875 |
| H                  | -0.61090 | -4.08150 | -0.40194 |
| H                  | 0.73087  | -4.99820 | -1.13409 |
| H                  | 0.94657  | -4.17169 | 0.42499  |
| C                  | 0.11276  | -2.33629 | -3.12730 |
| H                  | 0.40609  | -1.40680 | -3.62412 |
| H                  | 0.33262  | -3.17631 | -3.79711 |
| H                  | -0.96721 | -2.29264 | -2.95663 |
| C                  | 2.84104  | -2.32213 | -1.57401 |
| C                  | 3.41801  | -1.45194 | -2.51880 |
| C                  | 3.69700  | -2.93718 | -0.63989 |
| C                  | 4.79017  | -1.20043 | -2.52891 |
| H                  | 2.78900  | -0.95954 | -3.25726 |
| C                  | 5.07047  | -2.68800 | -0.64451 |
| H                  | 3.28718  | -3.61475 | 0.10443  |
| C                  | 5.61895  | -1.81615 | -1.58780 |
| H                  | 5.21315  | -0.52366 | -3.26663 |
| H                  | 5.71257  | -3.17379 | 0.08584  |
| H                  | 6.68738  | -1.61772 | -1.59041 |
| C                  | 4.35722  | 3.66182  | 0.43234  |
| F                  | 4.29415  | 4.53433  | 1.46315  |
| F                  | 5.59760  | 3.11520  | 0.45749  |
| F                  | 4.26779  | 4.37393  | -0.71351 |
| <b>TS-1 (R=Cl)</b> |          |          |          |
| Rh                 | -3.82494 | 0.45926  | 0.27539  |

|    |          |          |          |
|----|----------|----------|----------|
| Rh | -1.39078 | 0.09345  | -0.14102 |
| O  | -4.19974 | -0.92804 | -1.22086 |
| O  | -1.97374 | -1.24010 | -1.62715 |
| O  | -3.73645 | 1.96808  | -1.15253 |
| O  | -1.50592 | 1.64024  | -1.52479 |
| O  | -1.03265 | 1.45156  | 1.40744  |
| O  | -3.25905 | 1.82404  | 1.75066  |
| O  | -1.48336 | -1.41952 | 1.29430  |
| O  | -3.71135 | -1.09111 | 1.67008  |
| C  | 0.64887  | -0.23550 | -0.54339 |
| C  | 0.87894  | -1.48003 | -1.31062 |
| C  | 0.55461  | -2.74797 | -0.78748 |
| C  | 1.28568  | -1.40491 | -2.65813 |
| C  | 0.68750  | -3.89587 | -1.55930 |
| H  | 0.17322  | -2.81538 | 0.22463  |
| C  | 1.38742  | -2.55644 | -3.43929 |
| H  | 1.49455  | -0.43691 | -3.10080 |
| C  | 1.10761  | -3.80786 | -2.89151 |
| H  | 0.44694  | -4.86363 | -1.12696 |
| H  | 1.69452  | -2.47053 | -4.47812 |
| H  | 1.20323  | -4.70528 | -3.49649 |
| C  | 1.63091  | 0.86411  | -0.71153 |
| C  | 1.28385  | 2.20325  | -0.43060 |
| C  | 2.96983  | 0.60041  | -1.08357 |
| C  | 2.21731  | 3.22920  | -0.53537 |
| H  | 0.27491  | 2.43972  | -0.13026 |
| C  | 3.91320  | 1.61618  | -1.18881 |
| H  | 3.28690  | -0.41897 | -1.26511 |
| C  | 3.52736  | 2.92755  | -0.91297 |
| H  | 1.93606  | 4.25533  | -0.32449 |
| H  | 4.93922  | 1.39054  | -1.45620 |
| C  | -3.21405 | -1.43975 | -1.81655 |
| H  | -3.44881 | -2.16304 | -2.61236 |
| C  | -2.60554 | -1.65752 | 1.85156  |
| H  | -2.58882 | -2.47124 | 2.59396  |
| C  | -2.63307 | 2.20254  | -1.71033 |
| H  | -2.62837 | 3.00509  | -2.46367 |
| C  | -2.03539 | 1.99647  | 1.97559  |
| H  | -1.78073 | 2.71330  | 2.77224  |
| Si | 1.75952  | -0.94180 | 2.18870  |
| H  | 0.93620  | -0.68447 | 0.85778  |
| C  | 1.54902  | 0.64873  | 3.15654  |
| H  | 0.49799  | 0.77822  | 3.42682  |
| H  | 2.15868  | 0.64447  | 4.06858  |

|    |          |          |          |
|----|----------|----------|----------|
| H  | 1.83616  | 1.50988  | 2.54427  |
| C  | 1.05506  | -2.47489 | 3.01483  |
| H  | 1.16643  | -3.35797 | 2.37720  |
| H  | 1.58513  | -2.66909 | 3.95576  |
| H  | -0.00831 | -2.33594 | 3.22261  |
| C  | 3.50051  | -1.20005 | 1.56261  |
| C  | 3.81113  | -2.31818 | 0.76211  |
| C  | 4.50929  | -0.24594 | 1.78763  |
| C  | 5.07803  | -2.46760 | 0.19842  |
| H  | 3.05001  | -3.06432 | 0.54858  |
| C  | 5.78312  | -0.39959 | 1.23791  |
| H  | 4.29688  | 0.63776  | 2.38412  |
| C  | 6.06661  | -1.50754 | 0.43642  |
| H  | 5.29465  | -3.32960 | -0.42691 |
| H  | 6.54784  | 0.34985  | 1.42363  |
| H  | 7.05430  | -1.62394 | -0.00197 |
| Cl | 4.71333  | 4.21562  | -1.02397 |

**TS-2 (R=Cl)**

|    |          |          |          |
|----|----------|----------|----------|
| Rh | -3.71007 | 0.38278  | -0.51247 |
| Rh | -1.33811 | 0.03063  | 0.19067  |
| O  | -3.44087 | 2.39153  | -0.06168 |
| O  | -1.28635 | 2.06206  | 0.62695  |
| O  | -4.24390 | 0.02283  | 1.46324  |
| O  | -2.07771 | -0.30723 | 2.10779  |
| O  | -1.57569 | -1.97734 | -0.33567 |
| O  | -3.76323 | -1.67152 | -0.91759 |
| O  | -0.82406 | 0.42349  | -1.79518 |
| O  | -2.99207 | 0.72454  | -2.43942 |
| C  | 0.64714  | -0.25160 | 0.77912  |
| C  | 1.45165  | 0.98300  | 0.74200  |
| C  | 1.64456  | 1.71987  | -0.44344 |
| C  | 1.93005  | 1.53584  | 1.94843  |
| C  | 2.32176  | 2.93115  | -0.43709 |
| H  | 1.24574  | 1.33437  | -1.37302 |
| C  | 2.57798  | 2.76865  | 1.97156  |
| H  | 1.76665  | 1.00814  | 2.88175  |
| C  | 2.78447  | 3.45099  | 0.77442  |
| H  | 2.48377  | 3.47901  | -1.35918 |
| H  | 2.92795  | 3.19060  | 2.90753  |
| C  | 1.10247  | -1.32964 | 1.68656  |
| C  | 0.20508  | -2.28807 | 2.20089  |
| C  | 2.47945  | -1.48553 | 1.97613  |
| C  | 0.66359  | -3.33799 | 2.99335  |

|    |          |          |          |
|----|----------|----------|----------|
| H  | -0.84724 | -2.20070 | 1.97836  |
| C  | 2.93566  | -2.54641 | 2.75216  |
| H  | 3.19407  | -0.78564 | 1.55837  |
| C  | 2.02635  | -3.47462 | 3.26902  |
| H  | -0.04560 | -4.06012 | 3.38814  |
| H  | 3.99904  | -2.65206 | 2.94930  |
| H  | 2.37975  | -4.30315 | 3.87721  |
| C  | -2.32613 | 2.75723  | 0.39868  |
| H  | -2.22709 | 3.82669  | 0.63922  |
| C  | -1.75222 | 0.67407  | -2.63177 |
| H  | -1.40747 | 0.86538  | -3.65983 |
| C  | -3.33451 | -0.22479 | 2.29577  |
| H  | -3.65659 | -0.39815 | 3.33399  |
| C  | -2.72019 | -2.35175 | -0.75780 |
| H  | -2.78877 | -3.42083 | -1.01396 |
| Si | 1.69325  | -1.90347 | -1.59166 |
| H  | 0.99236  | -0.91325 | -0.60057 |
| C  | 1.43145  | -3.60078 | -0.83557 |
| H  | 0.35671  | -3.76220 | -0.70830 |
| H  | 1.83594  | -4.38695 | -1.48498 |
| H  | 1.89854  | -3.68754 | 0.15000  |
| C  | 0.87942  | -1.70579 | -3.27333 |
| H  | 1.01263  | -0.69415 | -3.66774 |
| H  | 1.30464  | -2.41914 | -3.99020 |
| H  | -0.19461 | -1.89080 | -3.18257 |
| C  | 3.47628  | -1.33340 | -1.56720 |
| C  | 3.86940  | -0.18435 | -2.28036 |
| C  | 4.44466  | -1.98019 | -0.77540 |
| C  | 5.17323  | 0.30454  | -2.20243 |
| H  | 3.14779  | 0.34025  | -2.90197 |
| C  | 5.75189  | -1.49724 | -0.69708 |
| H  | 4.17458  | -2.86679 | -0.20793 |
| C  | 6.11669  | -0.35125 | -1.40764 |
| H  | 5.45307  | 1.19648  | -2.75657 |
| H  | 6.48498  | -2.01290 | -0.08211 |
| H  | 7.13248  | 0.02958  | -1.34306 |
| Cl | 3.63463  | 4.98767  | 0.78653  |

**TS-1 (R=CN)**

|    |          |          |          |
|----|----------|----------|----------|
| Rh | -3.78567 | 0.41460  | 0.29895  |
| Rh | -1.35479 | 0.08459  | -0.15954 |
| O  | -4.16294 | -1.01716 | -1.15455 |
| O  | -1.93911 | -1.31308 | -1.58387 |
| O  | -3.76361 | 1.88315  | -1.17159 |

|    |          |          |          |
|----|----------|----------|----------|
| O  | -1.54119 | 1.57438  | -1.59851 |
| O  | -0.98892 | 1.49911  | 1.33292  |
| O  | -3.21417 | 1.82557  | 1.72678  |
| O  | -1.38603 | -1.37415 | 1.33256  |
| O  | -3.61535 | -1.08980 | 1.73359  |
| C  | 0.66370  | -0.19423 | -0.61031 |
| C  | 0.94447  | -1.45324 | -1.32640 |
| C  | 0.62906  | -2.70832 | -0.76488 |
| C  | 1.40156  | -1.41865 | -2.66033 |
| C  | 0.82090  | -3.88029 | -1.48518 |
| H  | 0.21884  | -2.74502 | 0.23731  |
| C  | 1.55541  | -2.59593 | -3.39282 |
| H  | 1.60633  | -0.46377 | -3.13243 |
| C  | 1.28583  | -3.83138 | -2.80500 |
| H  | 0.59061  | -4.83720 | -1.02436 |
| H  | 1.89619  | -2.54309 | -4.42316 |
| H  | 1.42420  | -4.74863 | -3.37064 |
| C  | 1.62022  | 0.92637  | -0.79721 |
| C  | 1.22389  | 2.26666  | -0.59548 |
| C  | 2.97741  | 0.68032  | -1.11302 |
| C  | 2.13090  | 3.31037  | -0.72613 |
| H  | 0.19929  | 2.48567  | -0.34142 |
| C  | 3.89283  | 1.71653  | -1.23837 |
| H  | 3.32629  | -0.33730 | -1.23123 |
| C  | 3.47288  | 3.04229  | -1.04706 |
| H  | 1.80905  | 4.33583  | -0.57628 |
| H  | 4.93249  | 1.50204  | -1.46013 |
| C  | -3.17994 | -1.53477 | -1.74867 |
| H  | -3.41608 | -2.28577 | -2.51772 |
| C  | -2.49280 | -1.62144 | 1.91675  |
| H  | -2.44253 | -2.40769 | 2.68634  |
| C  | -2.68227 | 2.11424  | -1.77042 |
| H  | -2.71135 | 2.88908  | -2.55141 |
| C  | -1.98965 | 2.03238  | 1.91597  |
| H  | -1.73158 | 2.77241  | 2.68964  |
| Si | 1.84015  | -0.81719 | 2.19673  |
| H  | 1.03131  | -0.60495 | 0.87348  |
| C  | 1.57222  | 0.75882  | 3.17735  |
| H  | 1.81391  | 1.63526  | 2.56716  |
| H  | 0.51895  | 0.84077  | 3.45885  |
| H  | 2.18837  | 0.77947  | 4.08459  |
| C  | 1.20562  | -2.37928 | 3.02792  |
| H  | 1.33460  | -3.25389 | 2.38167  |
| H  | 1.75788  | -2.56295 | 3.95788  |

|   |         |          |          |
|---|---------|----------|----------|
| H | 0.14175 | -2.27969 | 3.25621  |
| C | 3.59710 | -1.01021 | 1.58215  |
| C | 3.95234 | -2.12475 | 0.79495  |
| C | 4.56587 | -0.01183 | 1.78949  |
| C | 5.22187 | -2.22805 | 0.22637  |
| H | 3.22279 | -2.90629 | 0.59624  |
| C | 5.84241 | -0.11756 | 1.23376  |
| H | 4.32004 | 0.86850  | 2.37844  |
| C | 6.16933 | -1.22273 | 0.44495  |
| H | 5.47290 | -3.08903 | -0.38747 |
| H | 6.57579 | 0.66573  | 1.40617  |
| H | 7.15885 | -1.30232 | 0.00256  |
| C | 4.41636 | 4.11550  | -1.16056 |
| N | 5.18650 | 4.98295  | -1.24766 |

**TS-2 (R=CN)**

|    |          |          |          |
|----|----------|----------|----------|
| Rh | -3.66398 | 0.35024  | -0.55560 |
| Rh | -1.30454 | 0.04792  | 0.20460  |
| O  | -3.45393 | 2.35803  | -0.07226 |
| O  | -1.31579 | 2.07052  | 0.68051  |
| O  | -4.23999 | -0.05204 | 1.40024  |
| O  | -2.08425 | -0.35233 | 2.09196  |
| O  | -1.47759 | -1.95402 | -0.36624 |
| O  | -3.65884 | -1.69623 | -0.99174 |
| O  | -0.74972 | 0.49917  | -1.75694 |
| O  | -2.90863 | 0.73441  | -2.45684 |
| C  | 0.65086  | -0.19361 | 0.84815  |
| C  | 1.43486  | 1.05189  | 0.82433  |
| C  | 1.69762  | 1.76387  | -0.36291 |
| C  | 1.82319  | 1.63062  | 2.05267  |
| C  | 2.35784  | 2.98135  | -0.33220 |
| H  | 1.36885  | 1.35176  | -1.30716 |
| C  | 2.45314  | 2.86825  | 2.09238  |
| H  | 1.60490  | 1.11195  | 2.97976  |
| C  | 2.74102  | 3.54725  | 0.89777  |
| H  | 2.57627  | 3.50788  | -1.25561 |
| H  | 2.73675  | 3.30673  | 3.04368  |
| C  | 1.12262  | -1.27752 | 1.72383  |
| C  | 0.24753  | -2.28464 | 2.18580  |
| C  | 2.49789  | -1.38870 | 2.04783  |
| C  | 0.72456  | -3.33788 | 2.96116  |
| H  | -0.80076 | -2.22917 | 1.93581  |
| C  | 2.97220  | -2.45270 | 2.80689  |
| H  | 3.19587  | -0.65088 | 1.66875  |

|    |          |          |          |
|----|----------|----------|----------|
| C  | 2.08404  | -3.42878 | 3.27146  |
| H  | 0.03441  | -4.09789 | 3.31615  |
| H  | 4.03244  | -2.52470 | 3.03306  |
| H  | 2.45249  | -4.25995 | 3.86684  |
| C  | -2.36448 | 2.74485  | 0.42788  |
| H  | -2.29848 | 3.81269  | 0.68522  |
| C  | -1.66271 | 0.72863  | -2.61595 |
| H  | -1.29719 | 0.94502  | -3.63146 |
| C  | -3.34743 | -0.29861 | 2.25055  |
| H  | -3.69065 | -0.49961 | 3.27671  |
| C  | -2.60193 | -2.35166 | -0.82067 |
| H  | -2.63563 | -3.41722 | -1.09667 |
| Si | 1.79062  | -1.82103 | -1.59880 |
| H  | 1.06998  | -0.87067 | -0.61863 |
| C  | 1.61073  | -3.53235 | -0.84675 |
| H  | 0.54474  | -3.74641 | -0.72141 |
| H  | 2.05297  | -4.29834 | -1.49529 |
| H  | 2.07916  | -3.60051 | 0.13996  |
| C  | 0.95889  | -1.66411 | -3.27743 |
| H  | 1.05038  | -0.64941 | -3.67632 |
| H  | 1.39975  | -2.36306 | -3.99853 |
| H  | -0.10769 | -1.88674 | -3.17652 |
| C  | 3.55261  | -1.18060 | -1.59172 |
| C  | 3.91518  | -0.07028 | -2.37866 |
| C  | 4.52716  | -1.72142 | -0.73093 |
| C  | 5.19391  | 0.48241  | -2.30644 |
| H  | 3.18979  | 0.37260  | -3.05770 |
| C  | 5.80868  | -1.17285 | -0.65541 |
| H  | 4.28318  | -2.57785 | -0.10773 |
| C  | 6.14283  | -0.06719 | -1.44077 |
| H  | 5.45043  | 1.34102  | -2.92133 |
| H  | 6.54639  | -1.60743 | 0.01433  |
| H  | 7.13847  | 0.36395  | -1.37995 |
| C  | 3.42273  | 4.80622  | 0.92964  |
| N  | 3.98099  | 5.82695  | 0.95282  |

**TS-1 (R=F)**

|    |         |          |          |
|----|---------|----------|----------|
| Rh | 3.73687 | -0.30999 | 0.25442  |
| Rh | 1.28553 | -0.04762 | -0.14191 |
| O  | 4.03234 | 1.19533  | -1.14120 |
| O  | 1.78992 | 1.44601  | -1.49913 |
| O  | 3.73063 | -1.71136 | -1.28410 |
| O  | 1.49473 | -1.44047 | -1.66934 |
| O  | 1.00005 | -1.55307 | 1.27563  |



|    |          |          |          |
|----|----------|----------|----------|
| O  | 3.24107  | -1.80204 | 1.63197  |
| O  | 1.28587  | 1.32090  | 1.43889  |
| O  | 3.53829  | 1.12084  | 1.76041  |
| C  | -0.77012 | 0.18531  | -0.52987 |
| C  | -1.07303 | 1.52117  | -1.09232 |
| C  | -0.91536 | 2.70437  | -0.34453 |
| C  | -1.37198 | 1.64271  | -2.46488 |
| C  | -1.10561 | 3.95178  | -0.92825 |
| H  | -0.61274 | 2.63470  | 0.69292  |
| C  | -1.53402 | 2.89687  | -3.05315 |
| H  | -1.44719 | 0.74953  | -3.07583 |
| C  | -1.41996 | 4.05695  | -2.28735 |
| H  | -0.99432 | 4.84820  | -0.32368 |
| H  | -1.75613 | 2.96245  | -4.11492 |
| H  | -1.56191 | 5.03260  | -2.74389 |
| C  | -1.65084 | -0.94221 | -0.90820 |
| C  | -1.22776 | -2.28077 | -0.73772 |
| C  | -2.96874 | -0.72639 | -1.37878 |
| C  | -2.06052 | -3.34722 | -1.05563 |
| H  | -0.23962 | -2.47880 | -0.35181 |
| C  | -3.80918 | -1.78386 | -1.70563 |
| H  | -3.34960 | 0.28355  | -1.46461 |
| C  | -3.33795 | -3.08183 | -1.54204 |
| H  | -1.73753 | -4.37606 | -0.93661 |
| H  | -4.82236 | -1.61744 | -2.05385 |
| C  | 3.01829  | 1.71245  | -1.68271 |
| H  | 3.21317  | 2.50827  | -2.41781 |
| C  | 2.39737  | 1.58733  | 2.00354  |
| H  | 2.33627  | 2.32763  | 2.81706  |
| C  | 2.64724  | -1.93725 | -1.88299 |
| H  | 2.68825  | -2.66647 | -2.70666 |
| C  | 2.02934  | -2.06927 | 1.82311  |
| H  | 1.81184  | -2.85467 | 2.56435  |
| Si | -1.99055 | 0.33362  | 2.22912  |
| H  | -1.09746 | 0.36337  | 0.91880  |
| C  | -1.64862 | -1.34459 | 2.99058  |
| H  | -0.61566 | -1.38837 | 3.34392  |
| H  | -2.32586 | -1.54280 | 3.83069  |
| H  | -1.77285 | -2.13424 | 2.24285  |
| C  | -1.46431 | 1.79685  | 3.28364  |
| H  | -1.76624 | 2.74655  | 2.83017  |
| H  | -1.92680 | 1.73317  | 4.27650  |
| H  | -0.37666 | 1.79964  | 3.39314  |
| C  | -3.72941 | 0.48380  | 1.56275  |

|   |          |          |          |
|---|----------|----------|----------|
| C | -4.15818 | 1.67363  | 0.94010  |
| C | -4.61197 | -0.61138 | 1.57704  |
| C | -5.41726 | 1.75944  | 0.34626  |
| H | -3.49441 | 2.53313  | 0.89144  |
| C | -5.87760 | -0.52543 | 0.99525  |
| H | -4.30403 | -1.54969 | 2.03154  |
| C | -6.27956 | 0.65894  | 0.37421  |
| H | -5.72606 | 2.68162  | -0.13872 |
| H | -6.54356 | -1.38398 | 1.01599  |
| H | -7.26128 | 0.72548  | -0.08745 |
| F | -4.14695 | -4.11259 | -1.84706 |

**TS-2 (R=F)**

|    |          |          |          |
|----|----------|----------|----------|
| Rh | -3.64522 | 0.21224  | -0.51415 |
| Rh | -1.25541 | 0.00515  | 0.19359  |
| O  | -3.60357 | 2.12900  | 0.28123  |
| O  | -1.41537 | 1.94713  | 0.91621  |
| O  | -4.15850 | -0.54252 | 1.35478  |
| O  | -1.97747 | -0.67823 | 2.02013  |
| O  | -1.28060 | -1.92379 | -0.61052 |
| O  | -3.46279 | -1.73703 | -1.26186 |
| O  | -0.76486 | 0.73187  | -1.70512 |
| O  | -2.94845 | 0.96394  | -2.32678 |
| C  | 0.74652  | -0.15373 | 0.78791  |
| C  | 1.42353  | 1.15066  | 0.91342  |
| C  | 1.57071  | 2.02979  | -0.17897 |
| C  | 1.80957  | 1.61132  | 2.19096  |
| C  | 2.11570  | 3.29594  | -0.01683 |
| H  | 1.24114  | 1.70972  | -1.15850 |
| C  | 2.32202  | 2.89387  | 2.37127  |
| H  | 1.67612  | 0.96885  | 3.05431  |
| C  | 2.48086  | 3.71302  | 1.26067  |
| H  | 2.25184  | 3.96825  | -0.85740 |
| H  | 2.60364  | 3.25969  | 3.35291  |
| C  | 1.29129  | -1.27847 | 1.58812  |
| C  | 0.49181  | -2.38237 | 1.94805  |
| C  | 2.66702  | -1.32059 | 1.91735  |
| C  | 1.03862  | -3.46306 | 2.63649  |
| H  | -0.55511 | -2.38546 | 1.68688  |
| C  | 3.21371  | -2.40959 | 2.58958  |
| H  | 3.31204  | -0.50466 | 1.61187  |
| C  | 2.39787  | -3.48378 | 2.95804  |
| H  | 0.40200  | -4.29881 | 2.91324  |
| H  | 4.27527  | -2.42254 | 2.82162  |

|    |          |          |          |
|----|----------|----------|----------|
| H  | 2.82147  | -4.33434 | 3.48564  |
| C  | -2.53103 | 2.54440  | 0.79617  |
| H  | -2.55176 | 3.56769  | 1.20117  |
| C  | -1.70744 | 1.04594  | -2.50279 |
| H  | -1.37669 | 1.43687  | -3.47771 |
| C  | -3.23672 | -0.79106 | 2.17322  |
| H  | -3.54802 | -1.16019 | 3.16251  |
| C  | -2.36446 | -2.33392 | -1.14554 |
| H  | -2.31546 | -3.35364 | -1.55934 |
| Si | 1.95745  | -1.41916 | -1.71283 |
| H  | 1.15724  | -0.61605 | -0.62269 |
| C  | 1.87095  | -3.20769 | -1.15347 |
| H  | 0.81822  | -3.48545 | -1.04534 |
| H  | 2.34068  | -3.86984 | -1.89138 |
| H  | 2.35708  | -3.36306 | -0.18580 |
| C  | 1.11398  | -1.11501 | -3.36284 |
| H  | 1.14313  | -0.05796 | -3.64204 |
| H  | 1.59773  | -1.70092 | -4.15427 |
| H  | 0.06396  | -1.41209 | -3.29103 |
| C  | 3.67212  | -0.67725 | -1.60674 |
| C  | 3.95462  | 0.56245  | -2.21219 |
| C  | 4.69305  | -1.29178 | -0.85601 |
| C  | 5.20353  | 1.16715  | -2.07278 |
| H  | 3.18879  | 1.06608  | -2.79735 |
| C  | 5.94552  | -0.69196 | -0.71593 |
| H  | 4.50750  | -2.24567 | -0.36959 |
| C  | 6.20115  | 0.54044  | -1.32197 |
| H  | 5.39865  | 2.12599  | -2.54554 |
| H  | 6.72084  | -1.18408 | -0.13439 |
| H  | 7.17437  | 1.01100  | -1.21010 |
| F  | 3.00053  | 4.94613  | 1.42234  |

**TS-1 (R=I)**

|    |          |          |          |
|----|----------|----------|----------|
| Rh | -4.08969 | -1.32670 | -0.27159 |
| Rh | -1.86270 | -0.27437 | 0.14209  |
| O  | -4.78298 | -0.29104 | 1.38913  |
| O  | -2.73925 | 0.65056  | 1.78612  |
| O  | -3.47325 | -2.87540 | 0.97068  |
| O  | -1.43592 | -1.91239 | 1.34833  |
| O  | -1.19078 | -1.28507 | -1.55993 |
| O  | -3.21734 | -2.27670 | -1.91460 |
| O  | -2.48631 | 1.27603  | -1.10659 |
| O  | -4.52696 | 0.32150  | -1.47673 |
| C  | -0.00036 | 0.61312  | 0.53069  |

|    |          |          |          |
|----|----------|----------|----------|
| C  | -0.10359 | 1.79395  | 1.41414  |
| C  | -0.83066 | 2.94238  | 1.04048  |
| C  | 0.39972  | 1.72703  | 2.72941  |
| C  | -1.00037 | 3.99988  | 1.92556  |
| H  | -1.27687 | 2.98178  | 0.05350  |
| C  | 0.19866  | 2.77732  | 3.62524  |
| H  | 0.92391  | 0.83570  | 3.05713  |
| C  | -0.48541 | 3.92461  | 3.22500  |
| H  | -1.55030 | 4.88206  | 1.60826  |
| H  | 0.58713  | 2.69706  | 4.63690  |
| C  | 1.27680  | -0.14153 | 0.54510  |
| C  | 1.33453  | -1.49491 | 0.15147  |
| C  | 2.49426  | 0.49693  | 0.87333  |
| C  | 2.54393  | -2.18370 | 0.10549  |
| H  | 0.42595  | -2.01068 | -0.11889 |
| C  | 3.71015  | -0.17819 | 0.82547  |
| H  | 2.49668  | 1.54791  | 1.13627  |
| C  | 3.72511  | -1.51802 | 0.44004  |
| H  | 2.56110  | -3.22593 | -0.19401 |
| H  | 4.62828  | 0.34726  | 1.06099  |
| C  | -3.96918 | 0.43446  | 2.02139  |
| H  | -4.36933 | 0.96032  | 2.90173  |
| C  | -3.65549 | 1.21541  | -1.61198 |
| H  | -3.92435 | 2.06799  | -2.25555 |
| C  | -2.32711 | -2.81147 | 1.48582  |
| H  | -2.04252 | -3.64385 | 2.14743  |
| C  | -2.01160 | -2.04136 | -2.17633 |
| H  | -1.59451 | -2.55129 | -3.05916 |
| Si | 0.72046  | 1.85065  | -2.15346 |
| H  | 0.06224  | 1.25890  | -0.84464 |
| C  | 1.07895  | 0.34208  | -3.20654 |
| H  | 0.14161  | -0.14654 | -3.48376 |
| H  | 1.62938  | 0.61207  | -4.11619 |
| H  | 1.67101  | -0.38482 | -2.64059 |
| C  | -0.50079 | 3.06988  | -2.89631 |
| H  | -0.08207 | 3.51641  | -3.80680 |
| H  | -1.43630 | 2.56171  | -3.14173 |
| H  | -0.72820 | 3.87988  | -2.19541 |
| C  | 2.27408  | 2.67582  | -1.52079 |
| C  | 2.19438  | 3.79274  | -0.66470 |
| C  | 3.54709  | 2.14519  | -1.79906 |
| C  | 3.34227  | 4.34814  | -0.09955 |
| H  | 1.22664  | 4.21771  | -0.41164 |
| C  | 4.69970  | 2.70722  | -1.24786 |

|   |          |          |          |
|---|----------|----------|----------|
| H | 3.64238  | 1.27098  | -2.43784 |
| C | 4.59760  | 3.80544  | -0.39112 |
| H | 3.25906  | 5.20081  | 0.56900  |
| H | 5.67305  | 2.28101  | -1.47601 |
| H | 5.49247  | 4.23783  | 0.04877  |
| H | -0.62676 | 4.74867  | 3.91887  |
| I | 5.59637  | -2.55695 | 0.33173  |

**TS-2 (R=I)**

|    |          |          |          |
|----|----------|----------|----------|
| Rh | 3.79873  | -1.59503 | -0.26927 |
| Rh | 1.71720  | -0.28520 | 0.16279  |
| O  | 2.67664  | -3.31494 | 0.04511  |
| O  | 0.77709  | -2.11481 | 0.46334  |
| O  | 4.17730  | -1.47784 | 1.77115  |
| O  | 2.26436  | -0.29371 | 2.16803  |
| O  | 2.84370  | 1.43412  | -0.21061 |
| O  | 4.75852  | 0.23682  | -0.55396 |
| O  | 1.35038  | -0.39872 | -1.88805 |
| O  | 3.24699  | -1.60631 | -2.28461 |
| C  | -0.04479 | 0.78214  | 0.56350  |
| C  | -1.25535 | -0.05546 | 0.43067  |
| C  | -1.60704 | -0.66745 | -0.78857 |
| C  | -2.00542 | -0.39260 | 1.57387  |
| C  | -2.69331 | -1.52818 | -0.88080 |
| H  | -1.00409 | -0.47444 | -1.66827 |
| C  | -3.07869 | -1.28104 | 1.50045  |
| H  | -1.73274 | 0.02384  | 2.53744  |
| C  | -3.42949 | -1.82814 | 0.26908  |
| H  | -2.95291 | -1.97174 | -1.83591 |
| H  | -3.63421 | -1.52941 | 2.39805  |
| C  | -0.11035 | 1.94260  | 1.48058  |
| C  | 1.06028  | 2.48596  | 2.05451  |
| C  | -1.34062 | 2.58788  | 1.75331  |
| C  | 0.99508  | 3.59954  | 2.88722  |
| H  | 2.01361  | 2.02579  | 1.84771  |
| C  | -1.40006 | 3.70632  | 2.57937  |
| H  | -2.24976 | 2.22575  | 1.28835  |
| C  | -0.23245 | 4.21314  | 3.15381  |
| H  | 1.90709  | 3.99275  | 3.32782  |
| H  | -2.35612 | 4.18990  | 2.75695  |
| H  | -0.27662 | 5.08652  | 3.79937  |
| C  | 1.45745  | -3.18117 | 0.33518  |
| H  | 0.89215  | -4.11075 | 0.50184  |
| C  | 2.18449  | -1.02750 | -2.61984 |

|    |          |          |          |
|----|----------|----------|----------|
| H  | 1.92783  | -1.05585 | -3.69066 |
| C  | 3.34405  | -0.88042 | 2.50047  |
| H  | 3.56997  | -0.85276 | 3.57741  |
| C  | 4.08378  | 1.29337  | -0.47105 |
| H  | 4.62725  | 2.23507  | -0.64767 |
| Si | -0.28249 | 2.62845  | -1.85837 |
| H  | -0.02208 | 1.48952  | -0.80573 |
| C  | 1.09244  | 3.86259  | -1.53919 |
| H  | 2.05827  | 3.39925  | -1.75672 |
| H  | 0.97693  | 4.76356  | -2.15406 |
| H  | 1.10185  | 4.15531  | -0.48385 |
| C  | -0.26378 | 1.84040  | -3.56448 |
| H  | -0.43402 | 2.60260  | -4.33503 |
| H  | 0.69870  | 1.35566  | -3.74531 |
| H  | -1.04871 | 1.08266  | -3.65933 |
| C  | -1.96879 | 3.28245  | -1.38126 |
| C  | -3.11400 | 2.46886  | -1.49490 |
| C  | -2.11909 | 4.55631  | -0.80315 |
| C  | -4.35606 | 2.90521  | -1.03400 |
| H  | -3.03520 | 1.47302  | -1.92284 |
| C  | -3.36302 | 5.00383  | -0.35535 |
| H  | -1.25345 | 5.20276  | -0.68318 |
| C  | -4.48192 | 4.17515  | -0.46271 |
| H  | -5.22361 | 2.25624  | -1.11789 |
| H  | -3.45654 | 5.99218  | 0.08711  |
| H  | -5.44925 | 4.51642  | -0.10347 |
| I  | -5.10917 | -3.15399 | 0.13384  |

**TS-1 (R=Me)**

|    |          |          |          |
|----|----------|----------|----------|
| Rh | -3.74813 | 0.28567  | 0.25942  |
| Rh | -1.29244 | 0.05363  | -0.14038 |
| O  | -4.02927 | -1.18506 | -1.17553 |
| O  | -1.78482 | -1.39992 | -1.54518 |
| O  | -3.75008 | 1.72938  | -1.23881 |
| O  | -1.50928 | 1.49494  | -1.62146 |
| O  | -1.02226 | 1.51103  | 1.32963  |
| O  | -3.26664 | 1.74656  | 1.67481  |
| O  | -1.28619 | -1.36834 | 1.39050  |
| O  | -3.53858 | -1.18711 | 1.72484  |
| C  | 0.76813  | -0.15054 | -0.52888 |
| C  | 1.07949  | -1.45973 | -1.14744 |
| C  | 0.91820  | -2.67534 | -0.45437 |
| C  | 1.39290  | -1.51925 | -2.52051 |
| C  | 1.11610  | -3.89513 | -1.09141 |

|    |          |          |          |
|----|----------|----------|----------|
| H  | 0.60778  | -2.65184 | 0.58323  |
| C  | 1.56338  | -2.74555 | -3.16272 |
| H  | 1.47510  | -0.59893 | -3.08860 |
| C  | 1.44324  | -3.93892 | -2.45091 |
| H  | 1.00109  | -4.81803 | -0.52871 |
| H  | 1.79732  | -2.76320 | -4.22388 |
| H  | 1.59120  | -4.89306 | -2.94922 |
| C  | 1.64462  | 0.99720  | -0.85643 |
| C  | 1.21514  | 2.32671  | -0.64804 |
| C  | 2.97063  | 0.80955  | -1.31103 |
| C  | 2.05511  | 3.40067  | -0.91737 |
| H  | 0.22099  | 2.50900  | -0.26955 |
| C  | 3.80264  | 1.89007  | -1.58054 |
| H  | 3.36151  | -0.19465 | -1.42368 |
| C  | 3.35960  | 3.20613  | -1.39682 |
| H  | 1.69317  | 4.41306  | -0.75264 |
| H  | 4.82047  | 1.70597  | -1.91494 |
| C  | -3.01043 | -1.67434 | -1.73393 |
| H  | -3.19818 | -2.45048 | -2.49174 |
| C  | -2.39517 | -1.65729 | 1.94870  |
| H  | -2.32885 | -2.42421 | 2.73692  |
| C  | -2.66582 | 1.98555  | -1.82448 |
| H  | -2.71120 | 2.74039  | -2.62467 |
| C  | -2.05665 | 2.00994  | 1.88258  |
| H  | -1.84668 | 2.77522  | 2.64688  |
| Si | 1.98657  | -0.39082 | 2.20987  |
| H  | 1.08701  | -0.39076 | 0.90172  |
| C  | 1.70689  | 1.30517  | 2.95642  |
| H  | 0.66997  | 1.39724  | 3.28769  |
| H  | 2.37650  | 1.47935  | 3.80787  |
| H  | 1.88111  | 2.08244  | 2.20518  |
| C  | 1.40228  | -1.82835 | 3.26902  |
| H  | 1.63783  | -2.79017 | 2.80174  |
| H  | 1.89159  | -1.79908 | 4.25062  |
| H  | 0.31925  | -1.77091 | 3.40419  |
| C  | 3.71991  | -0.60864 | 1.54856  |
| C  | 4.11084  | -1.81501 | 0.93327  |
| C  | 4.63978  | 0.45560  | 1.56165  |
| C  | 5.36867  | -1.94672 | 0.34534  |
| H  | 3.41942  | -2.65225 | 0.88599  |
| C  | 5.90456  | 0.32311  | 0.98719  |
| H  | 4.36137  | 1.40709  | 2.00740  |
| C  | 6.26851  | -0.87690 | 0.37301  |
| H  | 5.64684  | -2.88077 | -0.13536 |

|   |         |          |          |
|---|---------|----------|----------|
| H | 6.59956 | 1.15845  | 1.00774  |
| H | 7.24931 | -0.97932 | -0.08411 |
| C | 4.25101 | 4.38011  | -1.71678 |
| H | 4.09057 | 4.71967  | -2.74895 |
| H | 4.04474 | 5.23245  | -1.06034 |
| H | 5.31050 | 4.11977  | -1.62063 |

**TS-2 (R=Me)**

|    |          |          |          |
|----|----------|----------|----------|
| Rh | -3.65570 | 0.22153  | -0.50499 |
| Rh | -1.26200 | 0.00937  | 0.19214  |
| O  | -3.60325 | 2.14283  | 0.27932  |
| O  | -1.41198 | 1.95620  | 0.90313  |
| O  | -4.16129 | -0.52104 | 1.37162  |
| O  | -1.97744 | -0.65750 | 2.02797  |
| O  | -1.29966 | -1.92543 | -0.59972 |
| O  | -3.48388 | -1.73337 | -1.24278 |
| O  | -0.77921 | 0.71723  | -1.71520 |
| O  | -2.96508 | 0.96093  | -2.32544 |
| C  | 0.74467  | -0.15279 | 0.77646  |
| C  | 1.42775  | 1.14969  | 0.87822  |
| C  | 1.59461  | 2.00603  | -0.22849 |
| C  | 1.80455  | 1.63938  | 2.14550  |
| C  | 2.14742  | 3.26881  | -0.07775 |
| H  | 1.27274  | 1.66945  | -1.20549 |
| C  | 2.32452  | 2.92406  | 2.29054  |
| H  | 1.65613  | 1.02015  | 3.02394  |
| C  | 2.52320  | 3.75663  | 1.18434  |
| H  | 2.28316  | 3.89844  | -0.95464 |
| H  | 2.58794  | 3.28017  | 3.28378  |
| C  | 1.28349  | -1.26854 | 1.59530  |
| C  | 0.48200  | -2.36903 | 1.96082  |
| C  | 2.65605  | -1.30574 | 1.93667  |
| C  | 1.02371  | -3.44200 | 2.66522  |
| H  | -0.56245 | -2.37669 | 1.68996  |
| C  | 3.19781  | -2.38686 | 2.62580  |
| H  | 3.30194  | -0.49129 | 1.62948  |
| C  | 2.38018  | -3.45799 | 2.99866  |
| H  | 0.38538  | -4.27544 | 2.94518  |
| H  | 4.25733  | -2.39589 | 2.86739  |
| H  | 2.80003  | -4.30247 | 3.53898  |
| C  | -2.52564 | 2.55647  | 0.78580  |
| H  | -2.54024 | 3.58222  | 1.18518  |
| C  | -1.72413 | 1.03297  | -2.50858 |
| H  | -1.39645 | 1.41591  | -3.48784 |



|    |          |          |          |
|----|----------|----------|----------|
| C  | -3.23596 | -0.76603 | 2.18737  |
| H  | -3.54381 | -1.12752 | 3.18068  |
| C  | -2.38745 | -2.33389 | -1.12766 |
| H  | -2.34451 | -3.35625 | -1.53588 |
| Si | 1.94234  | -1.45518 | -1.69705 |
| H  | 1.14209  | -0.63339 | -0.61789 |
| C  | 1.82595  | -3.23867 | -1.12754 |
| H  | 0.76892  | -3.50127 | -1.02468 |
| H  | 2.29238  | -3.91173 | -1.85770 |
| H  | 2.30317  | -3.39358 | -0.15535 |
| C  | 1.11118  | -1.14310 | -3.35168 |
| H  | 1.15427  | -0.08646 | -3.63076 |
| H  | 1.59101  | -1.73542 | -4.14072 |
| H  | 0.05722  | -1.42659 | -3.28346 |
| C  | 3.66950  | -0.74377 | -1.58565 |
| C  | 3.98065  | 0.48465  | -2.19973 |
| C  | 4.67422  | -1.37399 | -0.82611 |
| C  | 5.24209  | 1.06284  | -2.06112 |
| H  | 3.22751  | 1.00071  | -2.79005 |
| C  | 5.93896  | -0.80048 | -0.68645 |
| H  | 4.46604  | -2.31891 | -0.33164 |
| C  | 6.22349  | 0.42072  | -1.30207 |
| H  | 5.45927  | 2.01344  | -2.54097 |
| H  | 6.70117  | -1.30438 | -0.09769 |
| H  | 7.20665  | 0.87054  | -1.19107 |
| C  | 3.13708  | 5.12775  | 1.32898  |
| H  | 4.18737  | 5.12596  | 1.00725  |
| H  | 2.61319  | 5.86685  | 0.71164  |
| H  | 3.11148  | 5.47395  | 2.36729  |

**TS-1 (R=NMe<sub>2</sub>)**

|    |          |          |          |
|----|----------|----------|----------|
| Rh | 3.86914  | 0.45365  | -0.28972 |
| Rh | 1.43032  | 0.15007  | 0.16302  |
| O  | 4.22164  | -0.48642 | 1.52737  |
| O  | 1.98982  | -0.74277 | 1.95169  |
| O  | 3.72241  | 2.27785  | 0.70099  |
| O  | 1.49558  | 1.99324  | 1.12876  |
| O  | 1.06367  | 1.04921  | -1.69551 |
| O  | 3.29144  | 1.36662  | -2.08779 |
| O  | 1.58473  | -1.68103 | -0.82979 |
| O  | 3.81387  | -1.40507 | -1.23836 |
| C  | -0.64577 | -0.14042 | 0.52834  |
| C  | -0.86177 | -1.26722 | 1.46858  |
| C  | -0.63870 | -2.60958 | 1.11375  |

|    |          |          |          |
|----|----------|----------|----------|
| C  | -1.16199 | -0.98219 | 2.81622  |
| C  | -0.74521 | -3.62815 | 2.05491  |
| H  | -0.35545 | -2.84653 | 0.09604  |
| C  | -1.24836 | -2.00266 | 3.76137  |
| H  | -1.30119 | 0.04963  | 3.12147  |
| C  | -1.05267 | -3.33263 | 3.38579  |
| H  | -0.58353 | -4.65849 | 1.74841  |
| H  | -1.47244 | -1.75412 | 4.79558  |
| H  | -1.13301 | -4.12883 | 4.12097  |
| C  | -1.60837 | 0.97861  | 0.57015  |
| C  | -1.28944 | 2.25919  | 0.07036  |
| C  | -2.94289 | 0.78502  | 0.99466  |
| C  | -2.22191 | 3.28164  | 0.02122  |
| H  | -0.29104 | 2.44796  | -0.29548 |
| C  | -3.89261 | 1.79245  | 0.94112  |
| H  | -3.24626 | -0.19290 | 1.35244  |
| C  | -3.55591 | 3.08399  | 0.45973  |
| H  | -1.91094 | 4.24240  | -0.37086 |
| H  | -4.89987 | 1.57368  | 1.27519  |
| C  | 3.22777  | -0.85535 | 2.21082  |
| H  | 3.45527  | -1.34597 | 3.16980  |
| C  | 2.72180  | -2.02506 | -1.28747 |
| H  | 2.73857  | -3.00088 | -1.79878 |
| C  | 2.60624  | 2.61071  | 1.17899  |
| H  | 2.57537  | 3.57200  | 1.71555  |
| C  | 2.07146  | 1.44431  | -2.37168 |
| H  | 1.82314  | 1.91527  | -3.33662 |
| Si | -1.61932 | -1.07264 | -2.06342 |
| H  | -0.79828 | -0.68908 | -0.70465 |
| C  | -2.17183 | 0.59831  | -2.70274 |
| H  | -1.29575 | 1.24840  | -2.78069 |
| H  | -2.62555 | 0.48724  | -3.69598 |
| H  | -2.89250 | 1.08393  | -2.03921 |
| C  | -0.39143 | -1.94199 | -3.18271 |
| H  | -0.02281 | -2.87024 | -2.73907 |
| H  | -0.85515 | -2.16951 | -4.15120 |
| H  | 0.46861  | -1.28644 | -3.34232 |
| C  | -3.00808 | -2.15931 | -1.46105 |
| C  | -2.84212 | -3.55316 | -1.34593 |
| C  | -4.23367 | -1.60305 | -1.04449 |
| C  | -3.85650 | -4.36055 | -0.83320 |
| H  | -1.90839 | -4.01612 | -1.65567 |
| C  | -5.24990 | -2.40774 | -0.52861 |
| H  | -4.39315 | -0.53070 | -1.11092 |

|   |          |          |          |
|---|----------|----------|----------|
| C | -5.06187 | -3.78753 | -0.42020 |
| H | -3.70653 | -5.43364 | -0.75075 |
| H | -6.18729 | -1.95905 | -0.21012 |
| H | -5.85153 | -4.41455 | -0.01475 |
| N | -4.48573 | 4.09845  | 0.41398  |
| C | -4.13332 | 5.38121  | -0.17438 |
| H | -3.29437 | 5.84635  | 0.35844  |
| H | -3.85464 | 5.28707  | -1.23424 |
| H | -4.98779 | 6.05629  | -0.10543 |
| C | -5.86900 | 3.83400  | 0.77527  |
| H | -6.32933 | 3.07643  | 0.12355  |
| H | -5.95097 | 3.48567  | 1.81288  |
| H | -6.44740 | 4.75489  | 0.68633  |

**TS-2 (R=NMe2)**

|    |          |          |          |
|----|----------|----------|----------|
| Rh | -3.73489 | 0.70346  | -0.47286 |
| Rh | -1.40409 | 0.06189  | 0.17394  |
| O  | -3.21978 | 2.66363  | -0.00417 |
| O  | -1.09765 | 2.06925  | 0.61084  |
| O  | -4.26795 | 0.38840  | 1.51181  |
| O  | -2.13650 | -0.17585 | 2.11002  |
| O  | -1.89122 | -1.90609 | -0.34596 |
| O  | -4.03572 | -1.32946 | -0.88648 |
| O  | -0.89040 | 0.38304  | -1.82798 |
| O  | -3.01282 | 0.98533  | -2.41167 |
| C  | 0.58735  | -0.47539 | 0.69425  |
| C  | 1.51371  | 0.66500  | 0.63854  |
| C  | 1.73945  | 1.39285  | -0.54775 |
| C  | 2.09905  | 1.18168  | 1.81338  |
| C  | 2.52534  | 2.53003  | -0.57612 |
| H  | 1.27101  | 1.05496  | -1.46406 |
| C  | 2.85715  | 2.34416  | 1.80760  |
| H  | 1.91922  | 0.68583  | 2.76139  |
| C  | 3.11486  | 3.04424  | 0.60622  |
| H  | 2.67292  | 3.03000  | -1.52593 |
| H  | 3.24698  | 2.70592  | 2.75125  |
| C  | 0.90373  | -1.55896 | 1.67904  |
| C  | -0.10082 | -2.37804 | 2.22632  |
| C  | 2.24716  | -1.86715 | 1.98849  |
| C  | 0.22354  | -3.44110 | 3.06842  |
| H  | -1.13458 | -2.17969 | 1.98845  |
| C  | 2.57091  | -2.93831 | 2.81825  |
| H  | 3.04185  | -1.27532 | 1.54845  |
| C  | 1.55710  | -3.72896 | 3.36626  |

|    |          |          |          |
|----|----------|----------|----------|
| H  | -0.57108 | -4.05442 | 3.48479  |
| H  | 3.61386  | -3.15806 | 3.03195  |
| H  | 1.80552  | -4.56518 | 4.01474  |
| C  | -2.05365 | 2.88442  | 0.42322  |
| H  | -1.82050 | 3.93184  | 0.67106  |
| C  | -1.79614 | 0.76939  | -2.63569 |
| H  | -1.45487 | 0.92770  | -3.67122 |
| C  | -3.37103 | 0.04321  | 2.32412  |
| H  | -3.68841 | -0.09280 | 3.36978  |
| C  | -3.08233 | -2.13424 | -0.74379 |
| H  | -3.29007 | -3.18676 | -0.99534 |
| Si | 1.31937  | -2.26218 | -1.53288 |
| H  | 0.74228  | -1.12753 | -0.51757 |
| C  | 0.88215  | -3.88510 | -0.70592 |
| H  | -0.19099 | -3.88266 | -0.49382 |
| H  | 1.11269  | -4.72687 | -1.37136 |
| H  | 1.41099  | -4.02855 | 0.24023  |
| C  | 0.44869  | -2.00729 | -3.17455 |
| H  | 0.67852  | -1.03208 | -3.61113 |
| H  | 0.74927  | -2.79191 | -3.88092 |
| H  | -0.63195 | -2.05966 | -3.01950 |
| C  | 3.14479  | -1.87999 | -1.57686 |
| C  | 3.63471  | -0.80391 | -2.34211 |
| C  | 4.06356  | -2.60582 | -0.79357 |
| C  | 4.98653  | -0.46289 | -2.32467 |
| H  | 2.95324  | -0.21888 | -2.95434 |
| C  | 5.41784  | -2.27070 | -0.77726 |
| H  | 3.71779  | -3.43561 | -0.18346 |
| C  | 5.88042  | -1.19590 | -1.54054 |
| H  | 5.34205  | 0.37547  | -2.91768 |
| H  | 6.11122  | -2.84510 | -0.16847 |
| H  | 6.93413  | -0.93013 | -1.52398 |
| N  | 3.90932  | 4.17744  | 0.58216  |
| C  | 4.35351  | 4.76491  | 1.83516  |
| H  | 3.51455  | 5.09281  | 2.46895  |
| H  | 4.95523  | 4.05098  | 2.41044  |
| H  | 4.98283  | 5.63155  | 1.62375  |
| C  | 3.96384  | 4.98742  | -0.62390 |
| H  | 4.37228  | 4.41463  | -1.46575 |
| H  | 2.97468  | 5.36994  | -0.91989 |
| H  | 4.62446  | 5.83985  | -0.45499 |

**TS-1 (R=NO2)**

|    |          |         |         |
|----|----------|---------|---------|
| Rh | -3.89264 | 0.50421 | 0.29590 |
|----|----------|---------|---------|

|    |          |          |          |
|----|----------|----------|----------|
| Rh | -1.47446 | 0.09826  | -0.16360 |
| O  | -4.31707 | -0.86816 | -1.20184 |
| O  | -2.10384 | -1.21416 | -1.64787 |
| O  | -3.81074 | 2.01790  | -1.12437 |
| O  | -1.59411 | 1.65600  | -1.53883 |
| O  | -1.06038 | 1.44039  | 1.38332  |
| O  | -3.27445 | 1.84955  | 1.76681  |
| O  | -1.57798 | -1.42309 | 1.25771  |
| O  | -3.78993 | -1.05340 | 1.67961  |
| C  | 0.53684  | -0.25809 | -0.59924 |
| C  | 0.77649  | -1.48906 | -1.37320 |
| C  | 0.34571  | -2.74779 | -0.90293 |
| C  | 1.31527  | -1.41409 | -2.67476 |
| C  | 0.49563  | -3.88840 | -1.68019 |
| H  | -0.11401 | -2.80818 | 0.07681  |
| C  | 1.42774  | -2.55681 | -3.46675 |
| H  | 1.61642  | -0.45270 | -3.07685 |
| C  | 1.03652  | -3.79926 | -2.96883 |
| H  | 0.17458  | -4.85057 | -1.29011 |
| H  | 1.83130  | -2.47273 | -4.47196 |
| H  | 1.14126  | -4.69105 | -3.58058 |
| C  | 1.55882  | 0.81909  | -0.70131 |
| C  | 1.21772  | 2.17414  | -0.50459 |
| C  | 2.92049  | 0.49768  | -0.91243 |
| C  | 2.19015  | 3.16803  | -0.53101 |
| H  | 0.18782  | 2.44478  | -0.33528 |
| C  | 3.90374  | 1.47948  | -0.92211 |
| H  | 3.21513  | -0.53685 | -1.03512 |
| C  | 3.52105  | 2.80495  | -0.73233 |
| H  | 1.93526  | 4.21063  | -0.38716 |
| H  | 4.94845  | 1.22985  | -1.05562 |
| C  | -3.35114 | -1.39205 | -1.81792 |
| H  | -3.61082 | -2.10552 | -2.61457 |
| C  | -2.69331 | -1.64425 | 1.83568  |
| H  | -2.67654 | -2.46375 | 2.57092  |
| C  | -2.71554 | 2.23846  | -1.70156 |
| H  | -2.71101 | 3.04419  | -2.45108 |
| C  | -2.04414 | 1.99904  | 1.97248  |
| H  | -1.76343 | 2.70598  | 2.76879  |
| Si | 1.66955  | -0.99304 | 2.18761  |
| H  | 0.85574  | -0.75501 | 0.86961  |
| C  | 1.75769  | 0.70066  | 2.98823  |
| H  | 2.22718  | 1.42160  | 2.31023  |
| H  | 0.74568  | 1.05924  | 3.19450  |

|   |          |          |          |
|---|----------|----------|----------|
| H | 2.33056  | 0.67745  | 3.92323  |
| C | 0.76455  | -2.29778 | 3.19240  |
| H | 0.61491  | -3.21142 | 2.60785  |
| H | 1.34256  | -2.55552 | 4.08843  |
| H | -0.21784 | -1.92658 | 3.49486  |
| C | 3.33172  | -1.58263 | 1.56126  |
| C | 3.43289  | -2.78168 | 0.82742  |
| C | 4.48955  | -0.79485 | 1.70176  |
| C | 4.63870  | -3.16789 | 0.24202  |
| H | 2.55699  | -3.40887 | 0.68451  |
| C | 5.70202  | -1.18432 | 1.13007  |
| H | 4.44311  | 0.14383  | 2.24816  |
| C | 5.77551  | -2.36799 | 0.39169  |
| H | 4.69107  | -4.08801 | -0.33378 |
| H | 6.58375  | -0.56049 | 1.25031  |
| H | 6.71495  | -2.66648 | -0.06592 |
| N | 4.55968  | 3.85292  | -0.72804 |
| O | 4.19421  | 5.01760  | -0.57815 |
| O | 5.72889  | 3.49609  | -0.87105 |

**TS-2 (R=NO2)**

|    |          |          |          |
|----|----------|----------|----------|
| Rh | -3.72184 | 0.59011  | -0.55732 |
| Rh | -1.40355 | 0.08209  | 0.20834  |
| O  | -3.31482 | 2.58381  | -0.14434 |
| O  | -1.19682 | 2.11441  | 0.57661  |
| O  | -4.32540 | 0.31580  | 1.41282  |
| O  | -2.20064 | -0.13656 | 2.11589  |
| O  | -1.78947 | -1.91800 | -0.24930 |
| O  | -3.92658 | -1.45999 | -0.91376 |
| O  | -0.82764 | 0.36698  | -1.78074 |
| O  | -2.94974 | 0.83810  | -2.47180 |
| C  | 0.52576  | -0.33094 | 0.84341  |
| C  | 1.44032  | 0.81672  | 0.73230  |
| C  | 1.75673  | 1.42255  | -0.50051 |
| C  | 1.91697  | 1.41715  | 1.91961  |
| C  | 2.55417  | 2.55475  | -0.55482 |
| H  | 1.36083  | 0.99768  | -1.41216 |
| C  | 2.68849  | 2.57235  | 1.87691  |
| H  | 1.66077  | 0.98159  | 2.87905  |
| C  | 3.01281  | 3.11855  | 0.63687  |
| H  | 2.82165  | 3.01183  | -1.49928 |
| H  | 3.05295  | 3.04188  | 2.78216  |
| C  | 0.90147  | -1.41246 | 1.76407  |
| C  | -0.06556 | -2.28788 | 2.30536  |

|    |          |          |          |
|----|----------|----------|----------|
| C  | 2.26586  | -1.65937 | 2.05944  |
| C  | 0.31590  | -3.34285 | 3.12961  |
| H  | -1.10895 | -2.12831 | 2.08037  |
| C  | 2.64256  | -2.72694 | 2.86629  |
| H  | 3.02921  | -1.02738 | 1.61993  |
| C  | 1.66623  | -3.56899 | 3.40984  |
| H  | -0.44266 | -3.99900 | 3.54664  |
| H  | 3.69481  | -2.90585 | 3.06890  |
| C  | -2.17982 | 2.87972  | 0.31591  |
| H  | -2.00164 | 3.94506  | 0.52550  |
| C  | -1.71556 | 0.67644  | -2.64055 |
| H  | -1.33878 | 0.81287  | -3.66566 |
| C  | -3.45381 | 0.03309  | 2.27326  |
| H  | -3.80766 | -0.08906 | 3.30809  |
| C  | -2.94763 | -2.21583 | -0.69566 |
| H  | -3.09467 | -3.28450 | -0.91661 |
| Si | 1.43583  | -2.21188 | -1.53269 |
| H  | 0.83854  | -1.13614 | -0.60533 |
| C  | 1.07993  | -3.84871 | -0.68316 |
| H  | -0.00174 | -3.94018 | -0.54396 |
| H  | 1.43378  | -4.69467 | -1.28476 |
| H  | 1.54612  | -3.90643 | 0.30537  |
| C  | 0.60468  | -2.05620 | -3.21182 |
| H  | 0.80050  | -1.08056 | -3.66663 |
| H  | 0.95863  | -2.83653 | -3.89634 |
| H  | -0.47843 | -2.15626 | -3.09227 |
| C  | 3.25860  | -1.77398 | -1.57218 |
| C  | 3.72384  | -0.72235 | -2.38557 |
| C  | 4.18689  | -2.40755 | -0.72386 |
| C  | 5.05692  | -0.31351 | -2.34992 |
| H  | 3.03632  | -0.21044 | -3.05547 |
| C  | 5.52302  | -2.00433 | -0.68594 |
| H  | 3.86394  | -3.22281 | -0.08159 |
| C  | 5.95894  | -0.95331 | -1.49614 |
| H  | 5.39204  | 0.50359  | -2.98317 |
| H  | 6.22364  | -2.50907 | -0.02564 |
| H  | 6.99735  | -0.63463 | -1.46398 |
| H  | 1.95876  | -4.40192 | 4.04365  |
| N  | 3.86009  | 4.31704  | 0.58198  |
| O  | 4.23870  | 4.80076  | 1.64950  |
| O  | 4.14472  | 4.76605  | -0.52928 |

**TS-1 (R=OCF3)**

|    |         |          |         |
|----|---------|----------|---------|
| Rh | 3.93455 | -1.29279 | 0.36485 |
|----|---------|----------|---------|

|    |          |          |          |
|----|----------|----------|----------|
| Rh | 1.74115  | -0.22164 | -0.16209 |
| O  | 4.76645  | -0.13028 | -1.13882 |
| O  | 2.76095  | 0.84889  | -1.62592 |
| O  | 3.44628  | -2.74428 | -1.04102 |
| O  | 1.45005  | -1.74953 | -1.53689 |
| O  | 0.91804  | -1.39544 | 1.35725  |
| O  | 2.92388  | -2.37554 | 1.83916  |
| O  | 2.22295  | 1.22268  | 1.27544  |
| O  | 4.24087  | 0.25650  | 1.72968  |
| C  | -0.08139 | 0.68946  | -0.65942 |
| C  | 0.09924  | 1.92181  | -1.45627 |
| C  | 0.80554  | 3.03579  | -0.95953 |
| C  | -0.28903 | 1.93595  | -2.81300 |
| C  | 1.06102  | 4.13809  | -1.76579 |
| H  | 1.17199  | 3.01189  | 0.05841  |
| C  | 0.00269  | 3.02904  | -3.62853 |
| H  | -0.79005 | 1.07188  | -3.23558 |
| C  | 0.66157  | 4.14215  | -3.10688 |
| H  | 1.59170  | 4.99207  | -1.35306 |
| H  | -0.29415 | 3.00902  | -4.67368 |
| H  | 0.87319  | 5.00010  | -3.73909 |
| C  | -1.34689 | -0.05741 | -0.84904 |
| C  | -1.41941 | -1.44715 | -0.61654 |
| C  | -2.53216 | 0.60775  | -1.24408 |
| C  | -2.60376 | -2.14707 | -0.82576 |
| H  | -0.54006 | -1.97924 | -0.28945 |
| C  | -3.72108 | -0.08096 | -1.45214 |
| H  | -2.52061 | 1.68187  | -1.38100 |
| C  | -3.73503 | -1.45867 | -1.25122 |
| H  | -2.65997 | -3.21951 | -0.67326 |
| H  | -4.62619 | 0.43241  | -1.75215 |
| C  | 4.00715  | 0.64991  | -1.77377 |
| H  | 4.47896  | 1.24831  | -2.56798 |
| C  | 3.34955  | 1.12938  | 1.86827  |
| H  | 3.55316  | 1.92559  | 2.60148  |
| C  | 2.35413  | -2.63889 | -1.65601 |
| H  | 2.13641  | -3.41827 | -2.40206 |
| C  | 1.69188  | -2.18425 | 1.99339  |
| H  | 1.20161  | -2.77115 | 2.78592  |
| Si | -0.86803 | 1.77490  | 2.13052  |
| H  | -0.27947 | 1.24263  | 0.76437  |
| C  | -0.27593 | 0.60588  | 3.47227  |
| H  | 0.81607  | 0.61841  | 3.51151  |
| H  | -0.67687 | 0.90824  | 4.44761  |



|   |          |          |          |
|---|----------|----------|----------|
| H | -0.58349 | -0.42142 | 3.26179  |
| C | -0.26709 | 3.54366  | 2.35182  |
| H | -0.51274 | 4.17268  | 1.49015  |
| H | -0.72224 | 3.99103  | 3.24408  |
| H | 0.82052  | 3.55079  | 2.47611  |
| C | -2.71196 | 1.67441  | 1.84795  |
| C | -3.42914 | 2.75512  | 1.29848  |
| C | -3.41111 | 0.47865  | 2.10038  |
| C | -4.79025 | 2.64470  | 1.00986  |
| H | -2.92074 | 3.69343  | 1.08799  |
| C | -4.76968 | 0.36274  | 1.81210  |
| H | -2.88603 | -0.37953 | 2.51177  |
| C | -5.46026 | 1.44524  | 1.26160  |
| H | -5.32561 | 3.48998  | 0.58511  |
| H | -5.28465 | -0.57438 | 1.99202  |
| H | -6.51475 | 1.34668  | 1.02031  |
| O | -4.88792 | -2.20337 | -1.54472 |
| C | -5.90211 | -2.17831 | -0.64917 |
| F | -6.84603 | -3.01443 | -1.07473 |
| F | -5.50495 | -2.56376 | 0.58309  |
| F | -6.45025 | -0.94874 | -0.51833 |

**TS-2 (R=OCF3)**

|    |          |          |          |
|----|----------|----------|----------|
| Rh | -3.59251 | 1.28833  | -0.56148 |
| Rh | -1.48541 | 0.16807  | 0.17581  |
| O  | -2.62720 | 3.09918  | -0.23765 |
| O  | -0.70910 | 2.07186  | 0.46322  |
| O  | -4.19274 | 1.26465  | 1.42993  |
| O  | -2.26472 | 0.24346  | 2.10509  |
| O  | -2.43121 | -1.65711 | -0.20292 |
| O  | -4.37507 | -0.63344 | -0.83075 |
| O  | -0.90372 | 0.21013  | -1.83036 |
| O  | -2.82806 | 1.23605  | -2.49908 |
| C  | 0.27992  | -0.74207 | 0.80066  |
| C  | 1.46202  | 0.12662  | 0.65966  |
| C  | 1.88301  | 0.63218  | -0.58639 |
| C  | 2.10407  | 0.59876  | 1.82464  |
| C  | 2.92225  | 1.54773  | -0.67321 |
| H  | 1.37298  | 0.30913  | -1.48399 |
| C  | 3.11906  | 1.54917  | 1.74742  |
| H  | 1.77833  | 0.24492  | 2.79652  |
| C  | 3.52474  | 2.00280  | 0.49832  |
| H  | 3.26203  | 1.92688  | -1.63029 |
| H  | 3.60145  | 1.93457  | 2.63901  |

|    |          |          |          |
|----|----------|----------|----------|
| C  | 0.35692  | -1.84006 | 1.78502  |
| C  | -0.80582 | -2.39417 | 2.36047  |
| C  | 1.60375  | -2.43296 | 2.10023  |
| C  | -0.71956 | -3.47388 | 3.23592  |
| H  | -1.76849 | -1.97037 | 2.11903  |
| C  | 1.68337  | -3.52357 | 2.96002  |
| H  | 2.50684  | -2.05163 | 1.63729  |
| C  | 0.52009  | -4.04426 | 3.53612  |
| H  | -1.62548 | -3.87989 | 3.67707  |
| H  | 2.64984  | -3.97010 | 3.17731  |
| H  | 0.58010  | -4.89474 | 4.21013  |
| C  | -1.44298 | 3.07495  | 0.19256  |
| H  | -0.96564 | 4.05234  | 0.35977  |
| C  | -1.69569 | 0.72630  | -2.68456 |
| H  | -1.32805 | 0.71347  | -3.72230 |
| C  | -3.41070 | 0.77049  | 2.28136  |
| H  | -3.75274 | 0.78714  | 3.32748  |
| C  | -3.64028 | -1.62777 | -0.61063 |
| H  | -4.08930 | -2.61734 | -0.79022 |
| Si | 0.61310  | -2.85092 | -1.45155 |
| H  | 0.34321  | -1.60996 | -0.55382 |
| C  | -0.18190 | -4.28836 | -0.54315 |
| H  | -1.23990 | -4.05605 | -0.38701 |
| H  | -0.10298 | -5.21511 | -1.12466 |
| H  | 0.26821  | -4.45493 | 0.44009  |
| C  | -0.16086 | -2.53008 | -3.13327 |
| H  | 0.29165  | -1.66672 | -3.62973 |
| H  | -0.04702 | -3.40635 | -3.78327 |
| H  | -1.22681 | -2.31992 | -3.00564 |
| C  | 2.48379  | -2.93555 | -1.50201 |
| C  | 3.21714  | -2.07911 | -2.34606 |
| C  | 3.20537  | -3.78243 | -0.63872 |
| C  | 4.61171  | -2.06392 | -2.32761 |
| H  | 2.69503  | -1.41071 | -3.02719 |
| C  | 4.60117  | -3.77287 | -0.61797 |
| H  | 2.67353  | -4.45449 | 0.02978  |
| C  | 5.30663  | -2.91062 | -1.46048 |
| H  | 5.15619  | -1.39177 | -2.98551 |
| H  | 5.13818  | -4.43705 | 0.05441  |
| H  | 6.39315  | -2.89850 | -1.44221 |
| O  | 4.59816  | 2.90403  | 0.42229  |
| C  | 4.27349  | 4.21759  | 0.30837  |
| F  | 5.40875  | 4.91546  | 0.28320  |
| F  | 3.52166  | 4.64720  | 1.33993  |

|   |         |         |          |
|---|---------|---------|----------|
| F | 3.58332 | 4.47869 | -0.82134 |
|---|---------|---------|----------|

**TS-1 (R=OMe)**

|    |          |          |          |
|----|----------|----------|----------|
| Rh | 3.77513  | 0.05026  | -0.34073 |
| Rh | 1.32684  | 0.05469  | 0.15750  |
| O  | 4.04089  | -0.92749 | 1.47201  |
| O  | 1.80014  | -0.92468 | 1.92535  |
| O  | 3.88128  | 1.87845  | 0.64719  |
| O  | 1.65118  | 1.85892  | 1.14430  |
| O  | 1.04756  | 1.01926  | -1.68030 |
| O  | 3.28814  | 1.03330  | -2.12692 |
| O  | 1.23205  | -1.76035 | -0.87063 |
| O  | 3.47814  | -1.78645 | -1.28274 |
| C  | -0.73303 | 0.03671  | 0.59762  |
| C  | -1.09463 | -1.08757 | 1.48994  |
| C  | -1.04600 | -2.43291 | 1.08098  |
| C  | -1.35078 | -0.81690 | 2.85040  |
| C  | -1.27919 | -3.46365 | 1.98453  |
| H  | -0.80366 | -2.66161 | 0.05127  |
| C  | -1.55656 | -1.85414 | 3.75832  |
| H  | -1.35684 | 0.21170  | 3.19588  |
| C  | -1.53483 | -3.18200 | 3.32971  |
| H  | -1.25547 | -4.49372 | 1.63841  |
| H  | -1.73998 | -1.61977 | 4.80358  |
| H  | -1.71070 | -3.98941 | 4.03531  |
| C  | -1.56111 | 1.25573  | 0.66224  |
| C  | -1.08611 | 2.49443  | 0.18703  |
| C  | -2.90745 | 1.20654  | 1.10665  |
| C  | -1.88257 | 3.63511  | 0.19001  |
| H  | -0.07849 | 2.56155  | -0.19463 |
| C  | -3.71453 | 2.33029  | 1.10309  |
| H  | -3.32278 | 0.26227  | 1.43953  |
| C  | -3.20495 | 3.56188  | 0.65360  |
| H  | -1.46946 | 4.56833  | -0.17440 |
| H  | -4.74487 | 2.28889  | 1.44203  |
| C  | 3.02040  | -1.18298 | 2.16699  |
| H  | 3.20070  | -1.70389 | 3.11984  |
| C  | 2.31145  | -2.25206 | -1.33388 |
| H  | 2.19416  | -3.21676 | -1.85244 |
| C  | 2.82956  | 2.33941  | 1.16151  |
| H  | 2.92989  | 3.29322  | 1.70260  |
| C  | 2.08323  | 1.27685  | -2.38056 |
| H  | 1.87735  | 1.78164  | -3.33812 |
| Si | -1.91319 | -0.68899 | -2.06477 |

|   |          |          |          |
|---|----------|----------|----------|
| H | -1.05548 | -0.49167 | -0.74368 |
| C | -2.22139 | 1.05802  | -2.67260 |
| H | -1.25700 | 1.56015  | -2.79227 |
| H | -2.74176 | 1.04383  | -3.63838 |
| H | -2.81601 | 1.64294  | -1.96478 |
| C | -0.86073 | -1.71962 | -3.22721 |
| H | -0.64850 | -2.70837 | -2.81107 |
| H | -1.36105 | -1.84421 | -4.19565 |
| H | 0.09632  | -1.21333 | -3.38054 |
| C | -3.45634 | -1.55373 | -1.46209 |
| C | -3.49418 | -2.95407 | -1.31768 |
| C | -4.58915 | -0.81858 | -1.06151 |
| C | -4.61518 | -3.59579 | -0.79226 |
| H | -2.63691 | -3.55344 | -1.61480 |
| C | -5.71256 | -1.45666 | -0.53390 |
| H | -4.59361 | 0.26382  | -1.15337 |
| C | -5.72583 | -2.84644 | -0.39617 |
| H | -4.62218 | -4.67743 | -0.68761 |
| H | -6.57590 | -0.87042 | -0.22990 |
| H | -6.59853 | -3.34435 | 0.01811  |
| O | -4.06825 | 4.60578  | 0.69986  |
| C | -3.61336 | 5.88650  | 0.27731  |
| H | -3.32266 | 5.87984  | -0.78120 |
| H | -4.45824 | 6.56275  | 0.41683  |
| H | -2.76620 | 6.23046  | 0.88447  |

**TS-2 (R=OMe)**

|    |          |          |          |
|----|----------|----------|----------|
| Rh | -3.70403 | 0.41069  | -0.51099 |
| Rh | -1.32733 | 0.05373  | 0.18061  |
| O  | -3.39721 | 2.43425  | -0.15776 |
| O  | -1.23186 | 2.10506  | 0.50033  |
| O  | -4.21976 | 0.15218  | 1.48570  |
| O  | -2.04788 | -0.15383 | 2.12480  |
| O  | -1.60750 | -1.98099 | -0.22115 |
| O  | -3.79151 | -1.66322 | -0.81232 |
| O  | -0.83193 | 0.31597  | -1.83244 |
| O  | -2.99934 | 0.65478  | -2.46033 |
| C  | 0.69340  | -0.24162 | 0.73301  |
| C  | 1.50767  | 0.98035  | 0.60415  |
| C  | 1.68090  | 1.64401  | -0.63150 |
| C  | 2.01965  | 1.61285  | 1.75300  |
| C  | 2.36127  | 2.84337  | -0.71616 |
| H  | 1.26052  | 1.20362  | -1.52664 |
| C  | 2.67412  | 2.84277  | 1.68505  |

|    |          |          |          |
|----|----------|----------|----------|
| H  | 1.87489  | 1.15337  | 2.72482  |
| C  | 2.86386  | 3.45934  | 0.44321  |
| H  | 2.51187  | 3.33926  | -1.66998 |
| H  | 3.03075  | 3.30091  | 2.60017  |
| C  | 1.12861  | -1.23895 | 1.75571  |
| C  | 0.21538  | -2.12671 | 2.35531  |
| C  | 2.50006  | -1.39428 | 2.06126  |
| C  | 0.65314  | -3.10816 | 3.24350  |
| H  | -0.83525 | -2.04259 | 2.12301  |
| C  | 2.93700  | -2.38538 | 2.93641  |
| H  | 3.22717  | -0.74832 | 1.58200  |
| C  | 2.01178  | -3.24515 | 3.53566  |
| H  | -0.07108 | -3.77668 | 3.70102  |
| H  | 3.99832  | -2.48980 | 3.14649  |
| H  | 2.34896  | -4.01934 | 4.22001  |
| C  | -2.26556 | 2.80318  | 0.25886  |
| H  | -2.14572 | 3.88230  | 0.44144  |
| C  | -1.76458 | 0.55646  | -2.66631 |
| H  | -1.43045 | 0.68944  | -3.70741 |
| C  | -3.30110 | -0.05210 | 2.32079  |
| H  | -3.61344 | -0.16221 | 3.37087  |
| C  | -2.76247 | -2.35468 | -0.61516 |
| H  | -2.85585 | -3.43577 | -0.80627 |
| Si | 1.60796  | -2.06792 | -1.44326 |
| H  | 0.94248  | -0.96047 | -0.48599 |
| C  | 1.38324  | -3.67852 | -0.51228 |
| H  | 0.31974  | -3.79711 | -0.28423 |
| H  | 1.71052  | -4.52439 | -1.13013 |
| H  | 1.93279  | -3.70080 | 0.43287  |
| C  | 0.67564  | -2.03031 | -3.07063 |
| H  | 0.77910  | -1.06938 | -3.58069 |
| H  | 1.04643  | -2.82393 | -3.73190 |
| H  | -0.38772 | -2.19424 | -2.87747 |
| C  | 3.37662  | -1.48583 | -1.57225 |
| C  | 3.72643  | -0.43858 | -2.44673 |
| C  | 4.38542  | -2.02430 | -0.74972 |
| C  | 5.02998  | 0.05382  | -2.49772 |
| H  | 2.97241  | 0.00417  | -3.09295 |
| C  | 5.69180  | -1.53652 | -0.80004 |
| H  | 4.14823  | -2.82834 | -0.05842 |
| C  | 6.01483  | -0.49432 | -1.67235 |
| H  | 5.27690  | 0.86619  | -3.17583 |
| H  | 6.45679  | -1.96772 | -0.15953 |
| H  | 7.03083  | -0.11025 | -1.70918 |

|   |         |         |         |
|---|---------|---------|---------|
| O | 3.51040 | 4.64139 | 0.24967 |
| C | 4.02839 | 5.31998 | 1.38424 |
| H | 4.49449 | 6.23014 | 1.00227 |
| H | 3.23215 | 5.58895 | 2.09137 |
| H | 4.78379 | 4.71610 | 1.90528 |

**TS-1 (R=SCF3)**

|    |          |          |          |
|----|----------|----------|----------|
| Rh | 4.18374  | -1.07606 | 0.31876  |
| Rh | 1.90565  | -0.17184 | -0.16939 |
| O  | 4.92978  | 0.33993  | -1.00108 |
| O  | 2.84920  | 1.17799  | -1.43750 |
| O  | 3.89626  | -2.38836 | -1.27203 |
| O  | 1.83332  | -1.52802 | -1.74483 |
| O  | 1.16402  | -1.59089 | 1.16758  |
| O  | 3.24333  | -2.42608 | 1.60757  |
| O  | 2.18249  | 1.09890  | 1.46390  |
| O  | 4.28854  | 0.31443  | 1.86780  |
| C  | 0.02820  | 0.59600  | -0.64281 |
| C  | 0.07534  | 1.98472  | -1.13537 |
| C  | 0.55356  | 3.04439  | -0.33877 |
| C  | -0.21879 | 2.24936  | -2.48924 |
| C  | 0.68687  | 4.32445  | -0.86215 |
| H  | 0.82889  | 2.84301  | 0.68942  |
| C  | -0.04815 | 3.52807  | -3.01905 |
| H  | -0.55131 | 1.44082  | -3.13188 |
| C  | 0.38897  | 4.57425  | -2.20663 |
| H  | 1.03848  | 5.13076  | -0.22380 |
| H  | -0.26740 | 3.70515  | -4.06841 |
| H  | 0.50460  | 5.57402  | -2.61600 |
| C  | -1.12904 | -0.23982 | -1.04314 |
| C  | -1.07333 | -1.64704 | -0.96317 |
| C  | -2.36874 | 0.35677  | -1.36830 |
| C  | -2.21401 | -2.41887 | -1.15531 |
| H  | -0.14227 | -2.12974 | -0.71000 |
| C  | -3.50781 | -0.41085 | -1.58058 |
| H  | -2.45280 | 1.43615  | -1.40333 |
| C  | -3.43870 | -1.80065 | -1.43750 |
| H  | -2.16524 | -3.49754 | -1.04524 |
| H  | -4.45435 | 0.07113  | -1.79446 |
| C  | 4.11301  | 1.12006  | -1.55991 |
| H  | 4.54317  | 1.86006  | -2.25188 |
| C  | 3.29536  | 1.05324  | 2.08354  |
| H  | 3.38467  | 1.76036  | 2.92301  |
| C  | 2.82570  | -2.30603 | -1.92631 |

|    |          |          |          |
|----|----------|----------|----------|
| H  | 2.71700  | -2.99825 | -2.77525 |
| C  | 1.99573  | -2.37259 | 1.73729  |
| H  | 1.54446  | -3.09427 | 2.43636  |
| Si | -1.31893 | 0.85595  | 2.13061  |
| H  | -0.37784 | 0.80679  | 0.88124  |
| C  | -1.78167 | -0.92507 | 2.49888  |
| H  | -2.35745 | -1.36383 | 1.67773  |
| H  | -0.87275 | -1.51896 | 2.62251  |
| H  | -2.38387 | -0.99114 | 3.41361  |
| C  | -0.32649 | 1.70202  | 3.48470  |
| H  | -0.06680 | 2.72743  | 3.20063  |
| H  | -0.90026 | 1.74043  | 4.41878  |
| H  | 0.60502  | 1.15617  | 3.65807  |
| C  | -2.79024 | 1.85150  | 1.54016  |
| C  | -2.64506 | 3.20121  | 1.16201  |
| C  | -4.04942 | 1.24766  | 1.35962  |
| C  | -3.71168 | 3.91554  | 0.61619  |
| H  | -1.68421 | 3.69713  | 1.27095  |
| C  | -5.12235 | 1.96166  | 0.82386  |
| H  | -4.19699 | 0.20214  | 1.61334  |
| C  | -4.95330 | 3.29553  | 0.44673  |
| H  | -3.57423 | 4.95190  | 0.31931  |
| H  | -6.07928 | 1.46763  | 0.68572  |
| H  | -5.78437 | 3.85036  | 0.01899  |
| C  | -5.75573 | -2.16608 | -0.05171 |
| F  | -6.82385 | -2.93647 | 0.19315  |
| F  | -4.95747 | -2.17968 | 1.03543  |
| F  | -6.18696 | -0.89267 | -0.19407 |
| S  | -4.92266 | -2.80474 | -1.54500 |

**TS-2 (R=SCF3)**

|    |          |          |          |
|----|----------|----------|----------|
| Rh | 3.36795  | -1.82722 | -0.60780 |
| Rh | 1.52902  | -0.34641 | 0.20339  |
| O  | 2.13943  | -3.43382 | -0.13072 |
| O  | 0.46225  | -2.07609 | 0.62087  |
| O  | 4.10089  | -1.82288 | 1.33945  |
| O  | 2.40537  | -0.48602 | 2.08588  |
| O  | 2.73847  | 1.28076  | -0.30268 |
| O  | 4.43303  | -0.07300 | -1.01721 |
| O  | 0.81842  | -0.36800 | -1.76218 |
| O  | 2.50028  | -1.72371 | -2.49557 |
| C  | -0.00605 | 0.88181  | 0.86835  |
| C  | -1.33542 | 0.25345  | 0.78800  |
| C  | -1.92118 | -0.14125 | -0.43035 |

|    |          |          |          |
|----|----------|----------|----------|
| C  | -1.99022 | -0.09531 | 1.98823  |
| C  | -3.13277 | -0.81590 | -0.45352 |
| H  | -1.41440 | 0.08703  | -1.35744 |
| C  | -3.17730 | -0.82267 | 1.96857  |
| H  | -1.54306 | 0.17319  | 2.93941  |
| C  | -3.76125 | -1.17481 | 0.74778  |
| H  | -3.58662 | -1.08592 | -1.40055 |
| H  | -3.65229 | -1.11329 | 2.90016  |
| C  | 0.15648  | 2.00762  | 1.80455  |
| C  | 1.42641  | 2.37420  | 2.29916  |
| C  | -0.95437 | 2.81391  | 2.15565  |
| C  | 1.57122  | 3.48011  | 3.13264  |
| H  | 2.28928  | 1.78558  | 2.02761  |
| C  | -0.80206 | 3.92747  | 2.97472  |
| H  | -1.93211 | 2.57659  | 1.75151  |
| C  | 0.46285  | 4.26063  | 3.47107  |
| H  | 2.55526  | 3.74081  | 3.51172  |
| H  | -1.66575 | 4.53813  | 3.22328  |
| H  | 0.58357  | 5.12945  | 4.11272  |
| C  | 1.00293  | -3.19723 | 0.35927  |
| H  | 0.38222  | -4.07394 | 0.59778  |
| C  | 1.45502  | -1.04143 | -2.63620 |
| H  | 1.02403  | -1.00957 | -3.64873 |
| C  | 3.46491  | -1.18200 | 2.21449  |
| H  | 3.86970  | -1.21683 | 3.23747  |
| C  | 3.89397  | 1.03706  | -0.78694 |
| H  | 4.48786  | 1.93133  | -1.03290 |
| Si | -0.01148 | 2.94628  | -1.49132 |
| H  | 0.06007  | 1.72633  | -0.53993 |
| C  | 0.95284  | 4.30555  | -0.62480 |
| H  | 1.97912  | 3.96064  | -0.46440 |
| H  | 0.97716  | 5.21772  | -1.23349 |
| H  | 0.52962  | 4.55281  | 0.35365  |
| C  | 0.74204  | 2.45558  | -3.14184 |
| H  | 0.17541  | 1.65250  | -3.62150 |
| H  | 0.77775  | 3.31430  | -3.82335 |
| H  | 1.76090  | 2.09134  | -2.97994 |
| C  | -1.85132 | 3.28827  | -1.59507 |
| C  | -2.66380 | 2.58582  | -2.50568 |
| C  | -2.48088 | 4.17544  | -0.70087 |
| C  | -4.04790 | 2.75808  | -2.52308 |
| H  | -2.21208 | 1.89079  | -3.21012 |
| C  | -3.86565 | 4.35125  | -0.71363 |
| H  | -1.88386 | 4.73233  | 0.01669  |



|   |          |          |          |
|---|----------|----------|----------|
| C | -4.65156 | 3.64028  | -1.62361 |
| H | -4.65550 | 2.20464  | -3.23418 |
| H | -4.33160 | 5.04277  | -0.01628 |
| H | -5.73003 | 3.77375  | -1.63298 |
| C | -4.71034 | -3.68320 | 0.17986  |
| F | -3.78228 | -4.19483 | 1.00395  |
| F | -4.16269 | -3.63928 | -1.05091 |
| F | -5.75755 | -4.52373 | 0.14093  |
| S | -5.32311 | -2.05445 | 0.73452  |

### Dirhodium-C1

Conformations of each species were generated using Maestro with the OPLS3 force field. Conformational searches were conducted by restraining the position of the catalyst atoms and the Rh-C bond length. Geometry optimizations and frequency calculations were performed with Gaussian09 using ONIOM partitioning where carbon and hydrogen atoms in **C1** were modeled with UFF and all other atoms (including the carbene and silane) with B3LYP/6-31G(d)-LANL2DZ(Rh). All-DFT single point energy corrections were calculated at the M06/6-311++G(d,p)-SDD(Rh)/SMD(DCM) level of theory.

| Structure    | Electronic Energy | Zero Point Energy | Enthalpy   | Free Energy |
|--------------|-------------------|-------------------|------------|-------------|
| <b>TS-3</b>  | -6835.565466      | -6833.9538        | -6833.8602 | -6834.0875  |
| <b>TS-4</b>  | -6835.565181      | -6833.9536        | -6833.8602 | -6834.0839  |
| <b>TS-5</b>  | -6835.558894      | -6833.9472        | -6833.8537 | -6834.0785  |
| <b>TS-6</b>  | -6835.556087      | -6833.9446        | -6833.8512 | -6834.0757  |
| <b>TS-3'</b> | -6945.8393        | -6944.2597        | -6944.1659 | -6944.392   |
| <b>TS-4'</b> | -6945.8371        | -6944.2577        | -6944.1639 | -6944.3904  |
| <b>TS-5'</b> | -6945.8351        | -6944.2556        | -6944.1617 | -6944.3881  |
| <b>TS-6'</b> | -6945.8368        | -6944.2574        | -6944.1638 | -6944.3881  |

### **TS-3**

|    |          |          |          |
|----|----------|----------|----------|
| Rh | -0.14295 | 0.01475  | 0.09776  |
| Rh | -0.19853 | 0.31177  | -2.52950 |
| P  | 2.58202  | 0.86064  | -1.18911 |
| P  | 0.48631  | -2.58190 | -1.53673 |
| P  | -2.92088 | -0.47371 | -1.27909 |
| P  | -0.72711 | 2.91429  | -0.97317 |
| O  | 1.77818  | 0.82420  | 0.11482  |
| O  | 1.83929  | 0.80597  | -2.51391 |
| O  | 3.47869  | 2.23140  | -1.27657 |
| O  | 3.65829  | -0.37436 | -1.03067 |
| O  | 0.62554  | -1.93335 | -0.15377 |
| O  | 0.30516  | -1.70780 | -2.76125 |
| O  | 1.79293  | -3.51014 | -1.89474 |

|   |          |          |          |
|---|----------|----------|----------|
| O | -0.74006 | -3.66806 | -1.34265 |
| O | -2.06592 | -0.86347 | -0.06416 |
| O | -2.23989 | -0.17511 | -2.60001 |
| O | -3.82078 | 0.78058  | -0.70928 |
| O | -3.99950 | -1.66022 | -1.64952 |
| O | -0.86859 | 1.97319  | 0.23134  |
| O | -0.77018 | 2.32470  | -2.37234 |
| O | -1.92938 | 4.03799  | -0.94258 |
| O | 0.65684  | 3.75412  | -0.70777 |
| C | 6.35336  | 1.24944  | -1.16270 |
| C | 5.51796  | 1.89732  | -0.10321 |
| C | 4.22729  | 2.44594  | -0.19566 |
| C | 3.74004  | 3.16147  | 0.84577  |
| C | 4.48608  | 3.31271  | 2.03002  |
| C | 5.72476  | 2.67057  | 2.16742  |
| H | 6.28563  | 2.73954  | 3.08987  |
| C | 6.20959  | 1.93740  | 1.08540  |
| C | 7.45787  | 1.13688  | 1.03373  |
| H | 7.49668  | 0.40576  | 1.86936  |
| H | 8.34074  | 1.81078  | 1.06336  |
| C | 7.35499  | 0.41772  | -0.32398 |
| H | 8.35128  | 0.31960  | -0.80852 |
| H | 6.94811  | -0.60520 | -0.15548 |
| C | 5.65170  | 0.43243  | -2.20139 |
| C | 4.49255  | -0.47519 | -2.06575 |
| C | 4.14862  | -1.25708 | -3.18010 |
| H | 3.29793  | -1.91919 | -3.13534 |
| C | 4.84331  | -1.11791 | -4.39257 |
| C | 5.86788  | -0.17030 | -4.53050 |
| H | 6.36219  | -0.03891 | -5.48445 |
| C | 6.23917  | 0.60479  | -3.43099 |
| C | 7.27248  | 1.66811  | -3.41378 |
| H | 7.08644  | 2.41648  | -4.21404 |
| H | 8.28102  | 1.21637  | -3.52986 |
| C | 7.10700  | 2.29872  | -2.02174 |
| H | 8.09050  | 2.58957  | -1.59128 |
| H | 6.49091  | 3.22102  | -2.12311 |
| C | 0.63605  | -6.34485 | -1.80545 |
| C | 1.49810  | -5.61426 | -0.81646 |
| C | 2.11682  | -4.35683 | -0.92007 |
| C | 3.00351  | -3.95568 | 0.09669  |
| C | 3.20508  | -4.77009 | 1.22278  |
| C | 2.49900  | -5.97292 | 1.35675  |
| H | 2.60475  | -6.57489 | 2.24999  |

|   |          |          |          |
|---|----------|----------|----------|
| C | 1.63416  | -6.36277 | 0.33248  |
| C | 0.72308  | -7.53420 | 0.34696  |
| H | 1.31116  | -8.47198 | 0.25150  |
| H | 0.11050  | -7.54993 | 1.27421  |
| C | -0.16222 | -7.30569 | -0.89036 |
| H | -1.10875 | -6.81688 | -0.56490 |
| H | -0.42081 | -8.26622 | -1.38798 |
| C | -0.25994 | -5.55138 | -2.71249 |
| C | -0.97336 | -4.37037 | -2.44988 |
| C | -1.82798 | -3.86259 | -3.44729 |
| H | -2.38546 | -2.95369 | -3.27338 |
| C | -1.91992 | -4.49907 | -4.69498 |
| C | -1.13476 | -5.62603 | -4.96842 |
| H | -1.16431 | -6.09177 | -5.94504 |
| C | -0.29938 | -6.12307 | -3.96644 |
| C | 0.66204  | -7.24310 | -4.10417 |
| H | 1.30636  | -7.10736 | -4.99951 |
| H | 0.11253  | -8.20708 | -4.16239 |
| C | 1.49183  | -7.15584 | -2.81381 |
| H | 2.43498  | -6.60729 | -3.03744 |
| H | 1.76413  | -8.16771 | -2.44073 |
| C | -6.61578 | -0.34777 | -0.64376 |
| C | -6.00381 | 0.61946  | -1.61155 |
| C | -4.72945 | 1.20004  | -1.58588 |
| C | -4.39363 | 2.13884  | -2.58022 |
| H | -3.41794 | 2.60030  | -2.58647 |
| C | -5.30788 | 2.44946  | -3.59945 |
| C | -6.54891 | 1.80207  | -3.65127 |
| H | -7.23975 | 2.00287  | -4.45997 |
| C | -6.86688 | 0.87782  | -2.65434 |
| C | -8.08439 | 0.03567  | -2.59676 |
| H | -8.25677 | -0.48213 | -3.56498 |
| H | -8.96284 | 0.66049  | -2.32748 |
| C | -7.76174 | -0.97459 | -1.48492 |
| H | -8.66671 | -1.21106 | -0.88297 |
| H | -7.41173 | -1.91937 | -1.95968 |
| C | -5.74520 | -1.40993 | -0.03437 |
| C | -4.66462 | -2.12215 | -0.59153 |
| C | -4.20996 | -3.28993 | 0.05247  |
| H | -3.41359 | -3.87041 | -0.39487 |
| C | -4.72619 | -3.67625 | 1.23412  |
| C | -5.74725 | -2.83869 | 1.90414  |
| H | -6.11722 | -3.09099 | 2.88911  |
| C | -6.20332 | -1.71116 | 1.22750  |

|   |          |          |          |
|---|----------|----------|----------|
| C | -7.19938 | -0.72306 | 1.71341  |
| H | -6.88756 | -0.29256 | 2.68942  |
| H | -8.19784 | -1.20293 | 1.79913  |
| C | -7.19498 | 0.35059  | 0.60996  |
| H | -6.52350 | 1.18233  | 0.92259  |
| H | -8.21250 | 0.76768  | 0.44326  |
| C | -0.41286 | 6.64004  | -0.32619 |
| C | -1.22375 | 5.75106  | 0.56703  |
| C | -2.03453 | 4.65064  | 0.23737  |
| C | -2.85926 | 4.11653  | 1.24223  |
| C | -2.78425 | 4.62757  | 2.54956  |
| C | -1.86000 | 5.63855  | 2.85830  |
| H | -1.76137 | 5.99079  | 3.87729  |
| C | -1.10303 | 6.16094  | 1.87975  |
| C | -0.05371 | 7.20047  | 2.04207  |
| H | -0.52325 | 8.17695  | 2.28896  |
| H | 0.67771  | 6.91060  | 2.82720  |
| C | 0.61748  | 7.24507  | 0.65801  |
| H | 1.53205  | 6.60998  | 0.68550  |
| H | 0.92265  | 8.27967  | 0.38695  |
| C | 0.23266  | 6.01522  | -1.52147 |
| C | 0.87873  | 4.68946  | -1.63209 |
| C | 1.50135  | 4.37076  | -2.85438 |
| H | 1.96971  | 3.40804  | -2.99082 |
| C | 1.46572  | 5.23417  | -3.88922 |
| C | 0.77846  | 6.45570  | -3.78906 |
| H | 0.72159  | 7.11851  | -4.64299 |
| C | 0.15747  | 6.80044  | -2.58406 |
| C | -0.65014 | 8.02121  | -2.34106 |
| H | -1.43497 | 8.14088  | -3.11892 |
| H | 0.01154  | 8.91362  | -2.31433 |
| C | -1.27716 | 7.75580  | -0.96556 |
| H | -1.31799 | 8.68389  | -0.35390 |
| H | -2.32042 | 7.39560  | -1.11486 |
| H | -4.35616 | -4.56798 | 1.72296  |
| H | -3.41116 | 4.21720  | 3.32913  |
| H | 4.08197  | 3.88808  | 2.85267  |
| H | 3.87288  | -4.44726 | 2.01043  |
| H | -2.56810 | -4.09395 | -5.46112 |
| H | -5.03887 | 3.16345  | -4.36698 |
| H | 1.93671  | 4.96537  | -4.82616 |
| H | 4.55001  | -1.71418 | -5.24683 |
| C | -0.10251 | -0.08278 | 2.23649  |
| C | 1.28565  | -0.09156 | 2.75809  |

|    |          |          |         |
|----|----------|----------|---------|
| C  | -1.16198 | 0.53567  | 3.05327 |
| C  | 2.15569  | -1.16819 | 2.48675 |
| C  | 1.81493  | 1.02624  | 3.44062 |
| C  | -2.42442 | 0.84774  | 2.48716 |
| C  | -1.02378 | 0.73895  | 4.44639 |
| C  | 3.46537  | -1.17357 | 2.93716 |
| H  | 1.78873  | -1.99284 | 1.88984 |
| C  | 3.12100  | 1.02357  | 3.91854 |
| H  | 1.20036  | 1.90597  | 3.59163 |
| C  | -3.46347 | 1.33624  | 3.25733 |
| H  | -2.58505 | 0.68693  | 1.43334 |
| C  | -2.05248 | 1.25610  | 5.22816 |
| H  | -0.09736 | 0.46736  | 4.93898 |
| C  | 3.92900  | -0.08455 | 3.67615 |
| H  | 4.13260  | -2.00091 | 2.73293 |
| H  | 3.51792  | 1.86213  | 4.47748 |
| C  | -3.28708 | 1.56260  | 4.63265 |
| H  | -4.42618 | 1.56656  | 2.81162 |
| H  | -1.89045 | 1.40547  | 6.28964 |
| H  | -3.34913 | -3.22106 | 3.92105 |
| C  | -2.76446 | -2.33429 | 3.64582 |
| Si | -1.03315 | -2.85198 | 3.13039 |
| H  | -2.76906 | -1.64542 | 4.49441 |
| H  | -3.26434 | -1.82702 | 2.81684 |
| C  | 0.07978  | -3.15681 | 4.61390 |
| C  | -1.02257 | -4.28520 | 1.91957 |
| H  | -0.45707 | -1.56618 | 2.36201 |
| C  | 1.20711  | -3.99517 | 4.51416 |
| C  | -0.17499 | -2.55790 | 5.86408 |
| H  | -1.32304 | -3.96338 | 0.92051 |
| H  | -0.02409 | -4.71954 | 1.83481 |
| H  | -1.70225 | -5.07425 | 2.26582 |
| C  | 2.04504  | -4.22485 | 5.60484 |
| H  | 1.43406  | -4.48244 | 3.57133 |
| C  | 0.65967  | -2.78314 | 6.95964 |
| H  | -1.03829 | -1.91023 | 5.98881 |
| H  | 2.90834  | -4.87612 | 5.49776 |
| C  | 1.77381  | -3.61504 | 6.83141 |
| H  | 0.44031  | -2.31134 | 7.91403 |
| H  | 2.42608  | -3.78866 | 7.68307 |
| H  | -3.51970 | 3.28835  | 1.02022 |
| H  | 2.75737  | 3.60836  | 0.78635 |
| H  | 3.50239  | -2.99704 | 0.03383 |
| O  | -4.35673 | 2.06751  | 5.29201 |

|   |          |          |         |
|---|----------|----------|---------|
| C | -4.23327 | 2.35768  | 6.67888 |
| H | -5.19612 | 2.77107  | 6.98246 |
| H | -4.02684 | 1.45113  | 7.26159 |
| H | -3.44410 | 3.09721  | 6.86292 |
| N | 5.29173  | -0.11153 | 4.21112 |
| O | 6.01046  | -1.06461 | 3.90420 |
| O | 5.64063  | 0.81578  | 4.94473 |

**TS-4**

|    |          |          |          |
|----|----------|----------|----------|
| Rh | 0.11885  | -0.00436 | 0.08427  |
| Rh | 0.28878  | 0.44131  | -2.51873 |
| P  | 2.22035  | 2.14847  | -0.81699 |
| P  | 2.15183  | -1.82098 | -1.47418 |
| P  | -1.88843 | -1.58746 | -1.65841 |
| P  | -1.76801 | 2.25364  | -1.00985 |
| O  | 1.31904  | 1.67121  | 0.32279  |
| O  | 1.77557  | 1.92097  | -2.24924 |
| O  | 2.48419  | 3.76041  | -0.66831 |
| O  | 3.67962  | 1.44742  | -0.49135 |
| O  | 1.79363  | -1.27406 | -0.08486 |
| O  | 1.75898  | -1.04191 | -2.71150 |
| O  | 3.77687  | -2.01527 | -1.62637 |
| O  | 1.53699  | -3.34971 | -1.44302 |
| O  | -1.16399 | -1.62014 | -0.30254 |
| O  | -1.14164 | -1.05901 | -2.87177 |
| O  | -3.28031 | -0.77174 | -1.38530 |
| O  | -2.36409 | -3.11240 | -2.06607 |
| O  | -1.53486 | 1.28790  | 0.15778  |
| O  | -1.14998 | 1.94089  | -2.36452 |
| O  | -3.36821 | 2.40935  | -1.34358 |
| O  | -1.28286 | 3.71779  | -0.43587 |
| C  | 5.40468  | 4.01124  | 0.10771  |
| C  | 4.17591  | 4.12990  | 0.95626  |
| C  | 2.82347  | 4.11079  | 0.57276  |
| C  | 1.86924  | 4.34126  | 1.50782  |
| C  | 2.21335  | 4.53958  | 2.85870  |
| C  | 3.55392  | 4.46198  | 3.26055  |
| H  | 3.82563  | 4.55742  | 4.30341  |
| C  | 4.52213  | 4.22640  | 2.28489  |
| C  | 5.97012  | 3.98773  | 2.50434  |
| H  | 6.13338  | 3.20546  | 3.27627  |
| H  | 6.46913  | 4.93580  | 2.79830  |
| C  | 6.45805  | 3.50752  | 1.12533  |
| H  | 7.48454  | 3.87553  | 0.90674  |

|   |          |          |          |
|---|----------|----------|----------|
| H | 6.48120  | 2.39398  | 1.12452  |
| C | 5.32714  | 3.14827  | -1.11451 |
| C | 4.64648  | 1.85001  | -1.31514 |
| C | 4.87492  | 1.17605  | -2.52514 |
| H | 4.38240  | 0.23547  | -2.72317 |
| C | 5.67280  | 1.75571  | -3.52473 |
| C | 6.22697  | 3.03279  | -3.35367 |
| H | 6.80238  | 3.48653  | -4.15034 |
| C | 6.02456  | 3.71542  | -2.15307 |
| C | 6.51052  | 5.07726  | -1.82439 |
| H | 6.20111  | 5.80826  | -2.60220 |
| H | 7.61653  | 5.06753  | -1.71777 |
| C | 5.82921  | 5.38241  | -0.48057 |
| H | 6.50415  | 5.95541  | 0.19268  |
| H | 4.92879  | 6.00804  | -0.67606 |
| C | 4.03244  | -5.07188 | -1.67718 |
| C | 4.31191  | -4.08840 | -0.57778 |
| C | 4.32264  | -2.68383 | -0.61286 |
| C | 4.82209  | -1.98610 | 0.50222  |
| C | 5.22568  | -2.68465 | 1.65141  |
| C | 5.09068  | -4.07831 | 1.71202  |
| H | 5.34750  | -4.61633 | 2.61526  |
| C | 4.61822  | -4.75717 | 0.58739  |
| C | 4.37389  | -6.21679 | 0.47405  |
| H | 5.34216  | -6.76168 | 0.46942  |
| H | 3.72821  | -6.58177 | 1.30091  |
| C | 3.65994  | -6.34789 | -0.88214 |
| H | 2.56078  | -6.37399 | -0.70378 |
| H | 3.94920  | -7.28631 | -1.40442 |
| C | 2.99973  | -4.72721 | -2.70989 |
| C | 1.79340  | -4.02590 | -2.56056 |
| C | 0.92688  | -3.92970 | -3.66574 |
| H | -0.01390 | -3.40566 | -3.57412 |
| C | 1.29998  | -4.46847 | -4.90755 |
| C | 2.55152  | -5.07918 | -5.06154 |
| H | 2.86526  | -5.45258 | -6.02780 |
| C | 3.39070  | -5.18234 | -3.95046 |
| C | 4.77291  | -5.71911 | -3.94046 |
| H | 5.38892  | -5.24833 | -4.73671 |
| H | 4.75011  | -6.82278 | -4.06699 |
| C | 5.29103  | -5.33226 | -2.54575 |
| H | 5.88803  | -4.39658 | -2.63765 |
| H | 5.95353  | -6.12224 | -2.12831 |
| C | -5.41634 | -2.87129 | -1.52709 |

|   |          |          |          |
|---|----------|----------|----------|
| C | -5.06908 | -1.81452 | -2.52875 |
| C | -4.10659 | -0.80270 | -2.43009 |
| C | -3.95392 | 0.08961  | -3.51080 |
| H | -3.21188 | 0.87193  | -3.47504 |
| C | -4.73636 | -0.05568 | -4.66734 |
| C | -5.64686 | -1.11444 | -4.77135 |
| H | -6.21600 | -1.26209 | -5.68011 |
| C | -5.78068 | -1.99301 | -3.69513 |
| C | -6.59632 | -3.22953 | -3.67099 |
| H | -6.41156 | -3.84702 | -4.57648 |
| H | -7.67349 | -2.96929 | -3.59007 |
| C | -6.10431 | -3.95105 | -2.40696 |
| H | -6.94155 | -4.46840 | -1.88871 |
| H | -5.36239 | -4.72429 | -2.71055 |
| C | -4.30734 | -3.46437 | -0.70524 |
| C | -2.96940 | -3.74498 | -1.05846 |
| C | -2.20957 | -4.58891 | -0.22519 |
| H | -1.20005 | -4.85284 | -0.51447 |
| C | -2.70502 | -5.04039 | 0.94235  |
| C | -4.04025 | -4.59964 | 1.40148  |
| H | -4.42092 | -4.88968 | 2.37203  |
| C | -4.79081 | -3.81001 | 0.53625  |
| C | -6.14737 | -3.25992 | 0.78597  |
| H | -6.17136 | -2.66588 | 1.72450  |
| H | -6.88810 | -4.08690 | 0.82984  |
| C | -6.39345 | -2.36319 | -0.43987 |
| H | -6.14549 | -1.31230 | -0.16897 |
| H | -7.45738 | -2.39682 | -0.76223 |
| C | -3.94081 | 5.34286  | -0.68360 |
| C | -4.26108 | 4.09818  | 0.08406  |
| C | -4.10559 | 2.75434  | -0.29002 |
| C | -4.72491 | 1.77341  | 0.50251  |
| C | -5.40774 | 2.15359  | 1.66889  |
| C | -5.41034 | 3.49711  | 2.07858  |
| H | -5.88353 | 3.77996  | 3.01026  |
| C | -4.83160 | 4.42384  | 1.29759  |
| C | -4.73180 | 5.87875  | 1.58280  |
| H | -5.74110 | 6.34225  | 1.54428  |
| H | -4.25754 | 6.06006  | 2.57143  |
| C | -3.84099 | 6.40182  | 0.44117  |
| H | -2.79139 | 6.46505  | 0.80787  |
| H | -4.15525 | 7.41680  | 0.11231  |
| C | -2.73618 | 5.32516  | -1.57036 |
| C | -1.41783 | 4.69617  | -1.33178 |



|    |          |          |          |
|----|----------|----------|----------|
| C  | -0.39827 | 4.95491  | -2.26638 |
| H  | 0.57562  | 4.50878  | -2.13975 |
| C  | -0.64398 | 5.69623  | -3.36522 |
| C  | -1.92885 | 6.20319  | -3.62294 |
| H  | -2.12142 | 6.75859  | -4.53188 |
| C  | -2.95573 | 5.97970  | -2.69985 |
| C  | -4.36681 | 6.41460  | -2.84762 |
| H  | -4.78671 | 6.08074  | -3.82102 |
| H  | -4.43457 | 7.51967  | -2.75183 |
| C  | -5.06991 | 5.71389  | -1.67725 |
| H  | -5.85390 | 6.36298  | -1.22867 |
| H  | -5.56257 | 4.79110  | -2.05974 |
| H  | -2.11669 | -5.69982 | 1.56233  |
| H  | -5.90585 | 1.40527  | 2.26775  |
| H  | 1.43796  | 4.70482  | 3.59529  |
| H  | 5.59637  | -2.14045 | 2.51037  |
| H  | 0.63586  | -4.37679 | -5.75709 |
| H  | -4.60759 | 0.62874  | -5.49572 |
| H  | 0.14795  | 5.86632  | -4.08343 |
| H  | 5.82314  | 1.22998  | -4.45873 |
| C  | 0.07945  | -0.25220 | 2.21739  |
| C  | 1.18104  | 0.32758  | 3.01533  |
| C  | -1.30575 | -0.17995 | 2.73778  |
| C  | 2.48731  | 0.41816  | 2.46747  |
| C  | 1.02933  | 0.74391  | 4.35592  |
| C  | -2.19810 | -1.26709 | 2.63805  |
| C  | -1.80169 | 1.02900  | 3.28000  |
| C  | 3.54977  | 0.91897  | 3.19599  |
| H  | 2.66104  | 0.06978  | 1.46102  |
| C  | 2.08761  | 1.26142  | 5.09903  |
| H  | 0.06181  | 0.66631  | 4.83874  |
| C  | -3.47354 | -1.20860 | 3.17859  |
| H  | -1.87585 | -2.17144 | 2.13944  |
| C  | -3.07641 | 1.10006  | 3.82692  |
| H  | -1.17758 | 1.91489  | 3.26991  |
| C  | 3.36264  | 1.35203  | 4.51957  |
| H  | 4.54017  | 0.98954  | 2.75741  |
| H  | 1.91367  | 1.57755  | 6.12123  |
| C  | -3.88736 | -0.03481 | 3.80708  |
| H  | -4.13961 | -2.06093 | 3.14700  |
| H  | -3.44570 | 2.01359  | 4.27690  |
| H  | 1.88183  | -5.11936 | 2.08405  |
| C  | 1.16340  | -4.37626 | 1.71616  |
| Si | 0.88865  | -3.07783 | 3.04159  |

|   |          |          |         |
|---|----------|----------|---------|
| H | 0.24266  | -4.90177 | 1.45409 |
| H | 1.54947  | -3.92876 | 0.79875 |
| C | -0.39599 | -3.59113 | 4.31017 |
| C | 2.47835  | -2.57831 | 3.90912 |
| H | 0.36423  | -1.70107 | 2.30510 |
| C | -0.73721 | -2.75192 | 5.39027 |
| C | -1.01840 | -4.85124 | 4.24059 |
| H | 3.13680  | -1.99279 | 3.26711 |
| H | 2.28595  | -1.98781 | 4.80937 |
| H | 3.00527  | -3.49378 | 4.20934 |
| C | -1.67551 | -3.14495 | 6.34307 |
| H | -0.26854 | -1.77591 | 5.48843 |
| C | -1.95563 | -5.25192 | 5.19438 |
| H | -0.75441 | -5.54151 | 3.44524 |
| H | -1.92918 | -2.47739 | 7.16214 |
| C | -2.29244 | -4.39490 | 6.24284 |
| H | -2.42111 | -6.23095 | 5.11783 |
| H | -3.02826 | -4.69977 | 6.98198 |
| H | -4.66604 | 0.72886  | 0.23208 |
| H | 0.82375  | 4.33286  | 1.22723 |
| H | 4.86279  | -0.90462 | 0.49233 |
| N | -5.19554 | 0.00460  | 4.46060 |
| O | -5.51096 | 1.03868  | 5.05450 |
| O | -5.90661 | -0.99985 | 4.38685 |
| O | 4.46385  | 1.82848  | 5.14904 |
| C | 4.33757  | 2.30928  | 6.48119 |
| H | 3.62052  | 3.13739  | 6.54143 |
| H | 4.02960  | 1.51080  | 7.16791 |
| H | 5.32911  | 2.66679  | 6.76266 |

**TS-5**

|    |          |          |          |
|----|----------|----------|----------|
| Rh | -0.08704 | -0.00003 | 0.07542  |
| Rh | 0.09650  | 0.24826  | -2.55745 |
| P  | 2.75820  | 0.75548  | -1.01158 |
| P  | 0.66365  | -2.63782 | -1.40650 |
| P  | -2.73594 | -0.48181 | -1.53479 |
| P  | -0.47957 | 2.89426  | -1.11790 |
| O  | 1.85751  | 0.74240  | 0.22659  |
| O  | 2.12420  | 0.73113  | -2.39269 |
| O  | 3.71131  | 2.09086  | -1.01523 |
| O  | 3.78531  | -0.51443 | -0.79274 |
| O  | 0.66758  | -1.96046 | -0.02951 |
| O  | 0.58140  | -1.79358 | -2.66146 |
| O  | 2.01018  | -3.55462 | -1.62299 |

|   |          |          |          |
|---|----------|----------|----------|
| O | -0.56165 | -3.73465 | -1.29244 |
| O | -1.99728 | -0.86294 | -0.24357 |
| O | -1.93958 | -0.20431 | -2.79319 |
| O | -3.66574 | 0.79094  | -1.05692 |
| O | -3.78867 | -1.66168 | -1.98659 |
| O | -0.76554 | 1.98211  | 0.08370  |
| O | -0.43401 | 2.28103  | -2.50688 |
| O | -1.62834 | 4.07030  | -1.20429 |
| O | 0.91504  | 3.67109  | -0.73879 |
| C | 6.53724  | 1.01550  | -0.74895 |
| C | 5.66172  | 1.67106  | 0.27321  |
| C | 4.39152  | 2.25335  | 0.11857  |
| C | 3.84756  | 2.93454  | 1.15546  |
| C | 4.51623  | 3.02148  | 2.39168  |
| C | 5.73451  | 2.35347  | 2.58031  |
| H | 6.23870  | 2.37477  | 3.53663  |
| C | 6.27543  | 1.65334  | 1.50403  |
| C | 7.50184  | 0.81880  | 1.50806  |
| H | 7.46657  | 0.06509  | 2.32402  |
| H | 8.39917  | 1.46570  | 1.61200  |
| C | 7.46551  | 0.13833  | 0.12780  |
| H | 8.48736  | 0.02703  | -0.29699 |
| H | 7.02583  | -0.87829 | 0.24391  |
| C | 5.87000  | 0.23444  | -1.83675 |
| C | 4.67512  | -0.63536 | -1.77918 |
| C | 4.36730  | -1.38658 | -2.92545 |
| H | 3.49178  | -2.01668 | -2.94212 |
| C | 5.13348  | -1.25378 | -4.09480 |
| C | 6.19526  | -0.34012 | -4.16003 |
| H | 6.74549  | -0.21096 | -5.08318 |
| C | 6.52986  | 0.40572  | -3.02916 |
| C | 7.59218  | 1.43648  | -2.93824 |
| H | 7.47403  | 2.20086  | -3.73626 |
| H | 8.59164  | 0.95543  | -3.00466 |
| C | 7.36759  | 2.05340  | -1.54818 |
| H | 8.33333  | 2.30884  | -1.05903 |
| H | 6.78484  | 2.99472  | -1.66958 |
| C | 0.88932  | -6.40193 | -1.52753 |
| C | 1.65460  | -5.62291 | -0.49684 |
| C | 2.26482  | -4.36137 | -0.59545 |
| C | 3.05861  | -3.91055 | 0.47606  |
| C | 3.17321  | -4.67908 | 1.64540  |
| C | 2.46865  | -5.88460 | 1.76679  |
| H | 2.50218  | -6.44935 | 2.68946  |

|   |          |          |          |
|---|----------|----------|----------|
| C | 1.69923  | -6.32537 | 0.68795  |
| C | 0.80041  | -7.50624 | 0.66998  |
| H | 1.40262  | -8.43988 | 0.66291  |
| H | 0.11003  | -7.49323 | 1.54086  |
| C | 0.02346  | -7.33650 | -0.64749 |
| H | -0.95199 | -6.84712 | -0.42458 |
| H | -0.18223 | -8.31856 | -1.12738 |
| C | 0.06985  | -5.65592 | -2.54193 |
| C | -0.68041 | -4.47829 | -2.38998 |
| C | -1.44906 | -4.02107 | -3.47729 |
| H | -2.03409 | -3.11648 | -3.38586 |
| C | -1.41918 | -4.70377 | -4.70341 |
| C | -0.59786 | -5.82721 | -4.86242 |
| H | -0.53390 | -6.32937 | -5.81911 |
| C | 0.15020  | -6.27403 | -3.77149 |
| C | 1.13110  | -7.38553 | -3.77893 |
| H | 1.85284  | -7.27440 | -4.61672 |
| H | 0.59865  | -8.35816 | -3.85006 |
| C | 1.83930  | -7.24033 | -2.42302 |
| H | 2.79460  | -6.69004 | -2.58147 |
| H | 2.08492  | -8.23431 | -1.98837 |
| C | -6.46858 | -0.30807 | -1.23701 |
| C | -5.75946 | 0.64392  | -2.15212 |
| C | -4.48815 | 1.21453  | -2.01252 |
| C | -4.05557 | 2.14782  | -2.97359 |
| H | -3.08023 | 2.60319  | -2.88958 |
| C | -4.86962 | 2.46007  | -4.07415 |
| C | -6.10513 | 1.82040  | -4.23817 |
| H | -6.71720 | 2.02261  | -5.10766 |
| C | -6.52075 | 0.90319  | -3.27097 |
| C | -7.74624 | 0.07193  | -3.32021 |
| H | -7.83332 | -0.45204 | -4.29648 |
| H | -8.63999 | 0.70630  | -3.13757 |
| C | -7.53707 | -0.93230 | -2.17606 |
| H | -8.49583 | -1.15669 | -1.65869 |
| H | -7.15277 | -1.88362 | -2.60944 |
| C | -5.66977 | -1.37192 | -0.53894 |
| C | -4.55250 | -2.10328 | -0.98836 |
| C | -4.17362 | -3.26968 | -0.29474 |
| H | -3.34558 | -3.86313 | -0.66041 |
| C | -4.80264 | -3.63905 | 0.83644  |
| C | -5.87049 | -2.78275 | 1.40211  |
| H | -6.33414 | -3.02190 | 2.35002  |
| C | -6.24632 | -1.65532 | 0.67765  |

|   |          |          |          |
|---|----------|----------|----------|
| C | -7.27156 | -0.65175 | 1.06025  |
| H | -7.04493 | -0.21295 | 2.05594  |
| H | -8.27887 | -1.12065 | 1.06000  |
| C | -7.15561 | 0.40879  | -0.04973 |
| H | -6.50968 | 1.23946  | 0.31452  |
| H | -8.14973 | 0.83149  | -0.31450 |
| C | -0.06230 | 6.59660  | -0.41584 |
| C | -0.99482 | 5.73893  | 0.38431  |
| C | -1.82519 | 4.68592  | -0.03755 |
| C | -2.76669 | 4.18387  | 0.87706  |
| C | -2.78475 | 4.66961  | 2.19592  |
| C | -1.84280 | 5.62717  | 2.60601  |
| H | -1.81896 | 5.95819  | 3.63652  |
| C | -0.97492 | 6.12443  | 1.70962  |
| C | 0.10690  | 7.10533  | 1.98519  |
| H | -0.33286 | 8.10152  | 2.20680  |
| H | 0.74804  | 6.76664  | 2.82761  |
| C | 0.90308  | 7.13401  | 0.66830  |
| H | 1.77817  | 6.45204  | 0.76666  |
| H | 1.28341  | 8.15497  | 0.44475  |
| C | 0.65591  | 5.95490  | -1.55978 |
| C | 1.24934  | 4.60224  | -1.63264 |
| C | 1.96445  | 4.26824  | -2.79860 |
| H | 2.40323  | 3.28793  | -2.90506 |
| C | 2.05935  | 5.14303  | -3.82009 |
| C | 1.42188  | 6.39408  | -3.76311 |
| H | 1.47240  | 7.06836  | -4.60846 |
| C | 0.71265  | 6.75472  | -2.61260 |
| C | -0.05250 | 8.01154  | -2.42220 |
| H | -0.75985 | 8.17831  | -3.26317 |
| H | 0.64709  | 8.86955  | -2.32547 |
| C | -0.80890 | 7.76379  | -1.10994 |
| H | -0.85469 | 8.68585  | -0.48958 |
| H | -1.85258 | 7.46132  | -1.35420 |
| H | -4.49059 | -4.53059 | 1.36467  |
| H | -3.49734 | 4.27677  | 2.90848  |
| H | 4.06916  | 3.57011  | 3.21028  |
| H | 3.76768  | -4.31548 | 2.47351  |
| H | -2.00149 | -4.33812 | -5.53912 |
| H | -4.52607 | 3.16925  | -4.81595 |
| H | 2.60036  | 4.86320  | -4.71504 |
| H | 4.86781  | -1.82594 | -4.97422 |
| C | -0.27752 | -0.01068 | 2.21397  |
| C | 1.00856  | 0.09462  | 2.92272  |

|    |          |          |         |
|----|----------|----------|---------|
| C  | -1.48800 | 0.59113  | 2.87812 |
| C  | 2.03478  | -0.85140 | 2.67922 |
| C  | 1.31780  | 1.16189  | 3.78962 |
| C  | -2.62087 | 0.95183  | 2.12233 |
| C  | -1.58564 | 0.69189  | 4.28643 |
| C  | 3.24679  | -0.79261 | 3.33758 |
| H  | 1.85012  | -1.63835 | 1.95761 |
| C  | 2.54258  | 1.24074  | 4.45093 |
| H  | 0.60332  | 1.96385  | 3.93656 |
| C  | -3.78981 | 1.39807  | 2.73217 |
| H  | -2.59727 | 0.87048  | 1.04981 |
| C  | -2.73763 | 1.16046  | 4.90968 |
| H  | -0.75816 | 0.36893  | 4.90652 |
| C  | 3.50267  | 0.24081  | 4.25724 |
| H  | 4.01878  | -1.53538 | 3.16277 |
| H  | 2.73390  | 2.08133  | 5.10802 |
| C  | -3.83082 | 1.50830  | 4.11827 |
| H  | -4.65954 | 1.66073  | 2.14295 |
| H  | -2.80741 | 1.24223  | 5.98756 |
| H  | -3.64328 | -3.23535 | 3.55503 |
| C  | -3.06431 | -2.31625 | 3.40095 |
| Si | -1.26285 | -2.75080 | 3.09298 |
| H  | -3.21100 | -1.67196 | 4.27076 |
| H  | -3.46926 | -1.78948 | 2.53256 |
| C  | -0.29951 | -3.00751 | 4.68414 |
| C  | -1.05206 | -4.17830 | 1.89989 |
| H  | -0.62538 | -1.44086 | 2.36999 |
| C  | 0.92903  | -3.69634 | 4.67244 |
| C  | -0.77455 | -2.54438 | 5.92736 |
| H  | -1.40617 | -3.91920 | 0.90096 |
| H  | 0.00123  | -4.44668 | 1.80456 |
| H  | -1.59866 | -5.05708 | 2.26571 |
| C  | 1.65353  | -3.91356 | 5.84340 |
| H  | 1.32402  | -4.07388 | 3.73512 |
| C  | -0.05498 | -2.75985 | 7.10357 |
| H  | -1.72281 | -2.01709 | 5.98435 |
| H  | 2.59834  | -4.44917 | 5.80457 |
| C  | 1.16241  | -3.44289 | 7.06304 |
| H  | -0.44591 | -2.39859 | 8.05120 |
| H  | 1.72362  | -3.61140 | 7.97839 |
| H  | -3.44421 | 3.39410  | 0.58003 |
| H  | 2.87729  | 3.40173  | 1.04905 |
| H  | 3.55145  | -2.94894 | 0.41942 |
| N  | -5.06248 | 1.98551  | 4.76639 |

|   |          |         |         |
|---|----------|---------|---------|
| O | -6.01991 | 2.25740 | 4.04308 |
| O | -5.06074 | 2.08294 | 5.99394 |
| O | 4.70466  | 0.19078 | 4.89025 |
| C | 4.94669  | 1.10463 | 5.95097 |
| H | 4.20191  | 0.99134 | 6.74910 |
| H | 5.93727  | 0.85826 | 6.33678 |
| H | 4.94361  | 2.14576 | 5.60500 |

**TS-6**

|    |          |          |          |
|----|----------|----------|----------|
| Rh | 0.05318  | -0.03205 | 0.10444  |
| Rh | 0.11685  | 0.43177  | -2.50883 |
| P  | 2.16605  | 2.08078  | -0.89549 |
| P  | 1.96465  | -1.89070 | -1.54920 |
| P  | -2.06871 | -1.54597 | -1.57895 |
| P  | -1.81480 | 2.28689  | -0.90090 |
| O  | 1.34213  | 1.58244  | 0.29317  |
| O  | 1.62315  | 1.89538  | -2.29933 |
| O  | 2.44730  | 3.68505  | -0.72008 |
| O  | 3.63973  | 1.35971  | -0.69441 |
| O  | 1.67515  | -1.35274 | -0.13944 |
| O  | 1.54918  | -1.08410 | -2.76084 |
| O  | 3.57668  | -2.12953 | -1.76361 |
| O  | 1.30825  | -3.40100 | -1.50734 |
| O  | -1.29714 | -1.60384 | -0.25060 |
| O  | -1.35208 | -1.03695 | -2.81763 |
| O  | -3.42598 | -0.69135 | -1.25044 |
| O  | -2.60121 | -3.05465 | -1.97664 |
| O  | -1.54570 | 1.31706  | 0.25468  |
| O  | -1.27898 | 1.96175  | -2.28677 |
| O  | -3.42663 | 2.48110  | -1.15041 |
| O  | -1.26387 | 3.73874  | -0.35337 |
| C  | 5.42507  | 3.94181  | -0.31206 |
| C  | 4.31909  | 4.02840  | 0.69330  |
| C  | 2.93047  | 3.99176  | 0.48410  |
| C  | 2.09812  | 4.16146  | 1.54092  |
| C  | 2.60799  | 4.31622  | 2.84448  |
| C  | 3.99096  | 4.26358  | 3.06896  |
| H  | 4.39207  | 4.32727  | 4.07205  |
| C  | 4.83157  | 4.09612  | 1.96870  |
| C  | 6.30304  | 3.91066  | 1.99068  |
| H  | 6.59818  | 3.12558  | 2.71756  |
| H  | 6.80090  | 4.87348  | 2.23459  |
| C  | 6.62230  | 3.47032  | 0.55155  |
| H  | 7.59628  | 3.88310  | 0.20815  |

|   |          |          |          |
|---|----------|----------|----------|
| H | 6.69104  | 2.35887  | 0.52869  |
| C | 5.20479  | 3.06435  | -1.50563 |
| C | 4.53677  | 1.74645  | -1.60267 |
| C | 4.66155  | 1.04618  | -2.81296 |
| H | 4.17679  | 0.08919  | -2.93756 |
| C | 5.33025  | 1.62220  | -3.90558 |
| C | 5.85507  | 2.92079  | -3.82652 |
| H | 6.32669  | 3.37005  | -4.69101 |
| C | 5.76346  | 3.62737  | -2.62643 |
| C | 6.24847  | 5.00712  | -2.37687 |
| H | 5.82582  | 5.71734  | -3.11979 |
| H | 7.35905  | 5.02793  | -2.40662 |
| C | 5.72892  | 5.31550  | -0.96252 |
| H | 6.46335  | 5.91808  | -0.38411 |
| H | 4.79120  | 5.90960  | -1.05192 |
| C | 3.74689  | -5.19176 | -1.81422 |
| C | 4.09093  | -4.21399 | -0.72807 |
| C | 4.14129  | -2.81048 | -0.76884 |
| C | 4.69069  | -2.12394 | 0.32952  |
| C | 5.10335  | -2.82979 | 1.47083  |
| C | 4.93087  | -4.21900 | 1.54014  |
| H | 5.19536  | -4.76119 | 2.43865  |
| C | 4.41002  | -4.88775 | 0.43075  |
| C | 4.11738  | -6.33951 | 0.33062  |
| H | 5.06781  | -6.91409 | 0.29862  |
| H | 3.48651  | -6.68221 | 1.17812  |
| C | 3.35838  | -6.45245 | -1.00268 |
| H | 2.26492  | -6.44264 | -0.79079 |
| H | 3.60144  | -7.40143 | -1.52941 |
| C | 2.69502  | -4.81681 | -2.81705 |
| C | 1.51494  | -4.07949 | -2.63360 |
| C | 0.62093  | -3.95530 | -3.71374 |
| H | -0.30064 | -3.40293 | -3.59508 |
| C | 0.94176  | -4.50462 | -4.96550 |
| C | 2.16853  | -5.15451 | -5.15462 |
| H | 2.44252  | -5.53765 | -6.12912 |
| C | 3.03560  | -5.28412 | -4.06793 |
| C | 4.39950  | -5.86508 | -4.09723 |
| H | 5.00695  | -5.41476 | -4.91169 |
| H | 4.33755  | -6.96750 | -4.22152 |
| C | 4.97023  | -5.49464 | -2.71879 |
| H | 5.59524  | -4.57954 | -2.82970 |
| H | 5.61804  | -6.30588 | -2.31946 |
| C | -5.62368 | -2.73195 | -1.33339 |



|   |          |          |          |
|---|----------|----------|----------|
| C | -5.28100 | -1.67701 | -2.33860 |
| C | -4.28995 | -0.69078 | -2.26475 |
| C | -4.15461 | 0.20980  | -3.34085 |
| H | -3.39412 | 0.97448  | -3.32344 |
| C | -4.98048 | 0.09578  | -4.47039 |
| C | -5.91960 | -0.93957 | -4.55259 |
| H | -6.52408 | -1.06350 | -5.44188 |
| C | -6.03744 | -1.82566 | -3.48074 |
| C | -6.88461 | -3.04027 | -3.43852 |
| H | -6.74692 | -3.65449 | -4.35454 |
| H | -7.95111 | -2.75228 | -3.31928 |
| C | -6.36984 | -3.78543 | -2.19749 |
| H | -7.20283 | -4.28453 | -1.65507 |
| H | -5.65967 | -4.57553 | -2.53194 |
| C | -4.50525 | -3.36135 | -0.55246 |
| C | -3.18841 | -3.67603 | -0.95198 |
| C | -2.42464 | -4.54663 | -0.15075 |
| H | -1.43373 | -4.83695 | -0.47672 |
| C | -2.89242 | -4.99230 | 1.03024  |
| C | -4.19922 | -4.51879 | 1.53686  |
| H | -4.55560 | -4.80659 | 2.51722  |
| C | -4.95683 | -3.70340 | 0.70193  |
| C | -6.29037 | -3.12094 | 0.99853  |
| H | -6.27114 | -2.53610 | 1.94282  |
| H | -7.05069 | -3.92903 | 1.05715  |
| C | -6.55011 | -2.20603 | -0.21097 |
| H | -6.26283 | -1.16510 | 0.06035  |
| H | -7.62442 | -2.20621 | -0.49885 |
| C | -3.89785 | 5.42327  | -0.46986 |
| C | -4.20605 | 4.18827  | 0.31805  |
| C | -4.09677 | 2.84084  | -0.05810 |
| C | -4.68480 | 1.87304  | 0.77370  |
| C | -5.29382 | 2.26974  | 1.97503  |
| C | -5.25243 | 3.61552  | 2.37616  |
| H | -5.66900 | 3.91182  | 3.33027  |
| C | -4.70223 | 4.52873  | 1.55962  |
| C | -4.55861 | 5.98227  | 1.83278  |
| H | -5.55905 | 6.46593  | 1.84493  |
| H | -4.02968 | 6.15745  | 2.79443  |
| C | -3.71834 | 6.48340  | 0.64399  |
| H | -2.64999 | 6.52664  | 0.95524  |
| H | -4.02879 | 7.50358  | 0.32783  |
| C | -2.73940 | 5.37648  | -1.41576 |
| C | -1.42312 | 4.72162  | -1.24058 |

|    |          |          |          |
|----|----------|----------|----------|
| C  | -0.44476 | 4.96194  | -2.22295 |
| H  | 0.52586  | 4.49814  | -2.14293 |
| C  | -0.72920 | 5.70739  | -3.30961 |
| C  | -2.01528 | 6.23814  | -3.50599 |
| H  | -2.24074 | 6.79723  | -4.40507 |
| C  | -3.00046 | 6.03493  | -2.53414 |
| C  | -4.40755 | 6.49980  | -2.61300 |
| H  | -4.88214 | 6.17362  | -3.56360 |
| H  | -4.44676 | 7.60623  | -2.51694 |
| C  | -5.06666 | 5.81625  | -1.40737 |
| H  | -5.81361 | 6.48262  | -0.92239 |
| H  | -5.59683 | 4.90338  | -1.76246 |
| H  | -2.30160 | -5.67229 | 1.62527  |
| H  | -5.77029 | 1.53234  | 2.60452  |
| H  | 1.92968  | 4.43018  | 3.67997  |
| H  | 5.51188  | -2.29345 | 2.31747  |
| H  | 0.25690  | -4.39204 | -5.79584 |
| H  | -4.86448 | 0.78597  | -5.29588 |
| H  | 0.03039  | 5.86257  | -4.06518 |
| H  | 5.39700  | 1.07629  | -4.83770 |
| C  | 0.06752  | -0.24857 | 2.22718  |
| C  | 1.25966  | 0.26246  | 2.98960  |
| C  | -1.27038 | -0.11473 | 2.83717  |
| C  | 2.53064  | 0.28106  | 2.37175  |
| C  | 1.19415  | 0.65365  | 4.34605  |
| C  | -2.24973 | -1.12168 | 2.67451  |
| C  | -1.66251 | 1.04593  | 3.53492  |
| C  | 3.66817  | 0.69820  | 3.05419  |
| H  | 2.62730  | -0.05598 | 1.35178  |
| C  | 2.31953  | 1.08873  | 5.03914  |
| H  | 0.25403  | 0.60431  | 4.88042  |
| C  | -3.48300 | -1.04065 | 3.29393  |
| H  | -2.01613 | -1.98623 | 2.06578  |
| C  | -2.91167 | 1.14910  | 4.14706  |
| H  | -0.99506 | 1.89936  | 3.57789  |
| C  | 3.54682  | 1.10157  | 4.38192  |
| H  | 4.63723  | 0.71087  | 2.57033  |
| H  | 2.26417  | 1.39196  | 6.07740  |
| C  | -3.81011 | 0.07761  | 4.07773  |
| H  | -4.20472 | -1.84620 | 3.21265  |
| H  | -3.16743 | 2.06215  | 4.67286  |
| H  | 1.71873  | -5.18285 | 2.03648  |
| C  | 1.03080  | -4.40086 | 1.69208  |
| Si | 0.81402  | -3.12283 | 3.04775  |

|   |          |          |         |
|---|----------|----------|---------|
| H | 0.08662  | -4.87747 | 1.42004 |
| H | 1.43104  | -3.94528 | 0.78495 |
| C | -0.49090 | -3.60821 | 4.30679 |
| C | 2.43037  | -2.72745 | 3.92426 |
| H | 0.33219  | -1.72323 | 2.34653 |
| C | -0.83449 | -2.75835 | 5.37697 |
| C | -1.11926 | -4.86572 | 4.24375 |
| H | 3.13474  | -2.19696 | 3.28212 |
| H | 2.27412  | -2.12089 | 4.82097 |
| H | 2.89216  | -3.67394 | 4.23492 |
| C | -1.77950 | -3.13910 | 6.32803 |
| H | -0.36343 | -1.78316 | 5.46864 |
| C | -2.06320 | -5.25441 | 5.19580 |
| H | -0.85423 | -5.56325 | 3.45483 |
| H | -2.03331 | -2.46336 | 7.14035 |
| C | -2.40095 | -4.38721 | 6.23562 |
| H | -2.53211 | -6.23233 | 5.12534 |
| H | -3.14000 | -4.68394 | 6.97510 |
| H | -4.65849 | 0.82618  | 0.50510 |
| H | 1.02533  | 4.13744  | 1.39414 |
| H | 4.76126  | -1.04401 | 0.31400 |
| O | -5.01440 | 0.03003  | 4.71086 |
| C | -5.34659 | 1.07676  | 5.61034 |
| H | -5.44363 | 2.04216  | 5.09818 |
| H | -6.31042 | 0.80400  | 6.04359 |
| H | -4.59917 | 1.16978  | 6.40914 |
| N | 4.74653  | 1.51837  | 5.12416 |
| O | 4.58713  | 1.98146  | 6.25363 |
| O | 5.83695  | 1.37152  | 4.57384 |

**TS-3'**

|    |          |          |          |
|----|----------|----------|----------|
| Rh | -0.01177 | -0.01845 | 0.04102  |
| Rh | 0.25913  | 0.31092  | -2.56924 |
| P  | 2.57305  | 1.51971  | -0.83669 |
| P  | 1.50622  | -2.33098 | -1.42282 |
| P  | -2.33502 | -1.14918 | -1.73464 |
| P  | -1.13623 | 2.66332  | -1.16057 |
| O  | 1.61718  | 1.24912  | 0.33096  |
| O  | 2.07647  | 1.30664  | -2.25738 |
| O  | 3.09429  | 3.07434  | -0.80359 |
| O  | 3.89237  | 0.59584  | -0.50010 |
| O  | 1.26206  | -1.68956 | -0.05010 |
| O  | 1.27683  | -1.51560 | -2.67925 |
| O  | 3.05301  | -2.86131 | -1.56451 |

|   |          |          |          |
|---|----------|----------|----------|
| O | 0.60213  | -3.70824 | -1.38052 |
| O | -1.59538 | -1.34906 | -0.40225 |
| O | -1.55583 | -0.67663 | -2.94531 |
| O | -3.57236 | -0.14615 | -1.32060 |
| O | -3.04416 | -2.54801 | -2.22887 |
| O | -1.22337 | 1.68551  | 0.02098  |
| O | -0.81750 | 2.11234  | -2.53915 |
| O | -2.56920 | 3.45438  | -1.32438 |
| O | -0.05845 | 3.80699  | -0.69468 |
| C | 6.07406  | 2.84634  | -0.23469 |
| C | 4.94949  | 3.23230  | 0.67491  |
| C | 3.59154  | 3.44176  | 0.37697  |
| C | 2.78571  | 3.97902  | 1.32368  |
| C | 3.27788  | 4.27336  | 2.60933  |
| C | 4.60161  | 3.95660  | 2.94499  |
| H | 4.97539  | 4.12661  | 3.94624  |
| C | 5.41712  | 3.40593  | 1.95727  |
| C | 6.81902  | 2.94393  | 2.10936  |
| H | 6.91015  | 2.21768  | 2.94532  |
| H | 7.48857  | 3.81515  | 2.27412  |
| C | 7.11244  | 2.26724  | 0.75775  |
| H | 8.16335  | 2.43928  | 0.43678  |
| H | 6.95822  | 1.16980  | 0.86794  |
| C | 5.76893  | 1.91017  | -1.36106 |
| C | 4.86881  | 0.73810  | -1.39679 |
| C | 4.89994  | -0.06734 | -2.54665 |
| H | 4.24444  | -0.92037 | -2.62851 |
| C | 5.70986  | 0.27915  | -3.64024 |
| C | 6.47365  | 1.45520  | -3.62625 |
| H | 7.05497  | 1.73629  | -4.49498 |
| C | 6.47085  | 2.26250  | -2.48791 |
| C | 7.18747  | 3.54986  | -2.32148 |
| H | 6.94108  | 4.25174  | -3.14717 |
| H | 8.28298  | 3.36918  | -2.27782 |
| C | 6.66059  | 4.07615  | -0.97671 |
| H | 7.46276  | 4.59006  | -0.40262 |
| H | 5.85514  | 4.81819  | -1.17947 |
| C | 2.70411  | -5.90381 | -1.59731 |
| C | 3.18513  | -4.99174 | -0.50593 |
| C | 3.44794  | -3.61190 | -0.53872 |
| C | 4.04196  | -3.01157 | 0.58732  |
| C | 4.29962  | -3.76952 | 1.74104  |
| C | 3.93682  | -5.12211 | 1.78976  |
| H | 4.08020  | -5.69662 | 2.69583  |

|   |          |          |          |
|---|----------|----------|----------|
| C | 3.35864  | -5.70444 | 0.66059  |
| C | 2.80925  | -7.07944 | 0.56203  |
| H | 3.63821  | -7.81919 | 0.56428  |
| H | 2.10033  | -7.28453 | 1.39311  |
| C | 2.07817  | -7.06883 | -0.79161 |
| H | 0.99822  | -6.86455 | -0.61077 |
| H | 2.16425  | -8.05044 | -1.30748 |
| C | 1.76256  | -5.36242 | -2.63447 |
| C | 0.72360  | -4.42758 | -2.49453 |
| C | -0.09321 | -4.15445 | -3.60838 |
| H | -0.89883 | -3.43860 | -3.52774 |
| C | 0.16655  | -4.76490 | -4.84547 |
| C | 1.26222  | -5.62569 | -4.98811 |
| H | 1.49686  | -6.06071 | -5.95104 |
| C | 2.05563  | -5.89557 | -3.87157 |
| C | 3.29662  | -6.70667 | -3.85432 |
| H | 3.99774  | -6.37950 | -4.65214 |
| H | 3.04595  | -7.78260 | -3.97330 |
| C | 3.88198  | -6.42551 | -2.46159 |
| H | 4.65992  | -5.63442 | -2.55883 |
| H | 4.36656  | -7.33246 | -2.03744 |
| C | -6.00521 | -1.90375 | -1.58833 |
| C | -5.51891 | -0.81169 | -2.49209 |
| C | -4.43028 | 0.05201  | -2.31795 |
| C | -4.19729 | 1.04998  | -3.28346 |
| H | -3.36458 | 1.72815  | -3.17631 |
| C | -5.01941 | 1.14443  | -4.41762 |
| C | -6.05784 | 0.22454  | -4.61128 |
| H | -6.66646 | 0.26350  | -5.50551 |
| C | -6.27689 | -0.75559 | -3.64148 |
| C | -7.26117 | -1.86013 | -3.71898 |
| H | -7.18222 | -2.39675 | -4.68907 |
| H | -8.28830 | -1.46078 | -3.57728 |
| C | -6.85703 | -2.77482 | -2.55246 |
| H | -7.75131 | -3.22051 | -2.06377 |
| H | -6.23947 | -3.60842 | -2.95775 |
| C | -4.99333 | -2.73709 | -0.85477 |
| C | -3.71581 | -3.17160 | -1.26116 |
| C | -3.08580 | -4.20751 | -0.54362 |
| H | -2.12644 | -4.58072 | -0.87816 |
| C | -3.64015 | -4.71464 | 0.57335  |
| C | -4.90363 | -4.14564 | 1.09591  |
| H | -5.32422 | -4.48715 | 2.03248  |
| C | -5.52185 | -3.14895 | 0.34678  |

|   |          |          |          |
|---|----------|----------|----------|
| C | -6.77334 | -2.42575 | 0.68679  |
| H | -6.69354 | -1.94181 | 1.68419  |
| H | -7.63465 | -3.12714 | 0.66074  |
| C | -6.88448 | -1.37258 | -0.43085 |
| H | -6.47321 | -0.40782 | -0.05659 |
| H | -7.94264 | -1.20697 | -0.73067 |
| C | -1.85581 | 6.32268  | -0.47698 |
| C | -2.54623 | 5.22732  | 0.27791  |
| C | -3.00346 | 3.97766  | -0.17675 |
| C | -3.80547 | 3.21536  | 0.69030  |
| C | -4.04580 | 3.67095  | 1.99799  |
| C | -3.45555 | 4.86294  | 2.44778  |
| H | -3.59244 | 5.18293  | 3.47296  |
| C | -2.72051 | 5.59690  | 1.59655  |
| C | -1.99340 | 6.85131  | 1.92190  |
| H | -2.71889 | 7.67372  | 2.10136  |
| H | -1.33477 | 6.71325  | 2.80657  |
| C | -1.16039 | 7.11660  | 0.65549  |
| H | -0.13160 | 6.72164  | 0.81742  |
| H | -1.08306 | 8.20495  | 0.43986  |
| C | -0.90883 | 5.92236  | -1.56274 |
| C | 0.05458  | 4.80063  | -1.57656 |
| C | 0.90651  | 4.68940  | -2.69219 |
| H | 1.61307  | 3.87581  | -2.75718 |
| C | 0.80900  | 5.55672  | -3.71976 |
| C | -0.16506 | 6.56966  | -3.72177 |
| H | -0.25901 | 7.23104  | -4.57351 |
| C | -1.01990 | 6.70634  | -2.62297 |
| C | -2.12911 | 7.68423  | -2.50127 |
| H | -2.79812 | 7.63976  | -3.38771 |
| H | -1.71800 | 8.70881  | -2.37417 |
| C | -2.86411 | 7.22199  | -1.23558 |
| H | -3.21778 | 8.08830  | -0.63430 |
| H | -3.75538 | 6.62770  | -1.54028 |
| H | -3.13597 | -5.49985 | 1.12146  |
| H | -4.65232 | 3.08397  | 2.67362  |
| H | 2.61958  | 4.70095  | 3.35423  |
| H | 4.73919  | -3.29813 | 2.61019  |
| H | -0.45661 | -4.53806 | -5.70066 |
| H | -4.82804 | 1.90708  | -5.16124 |
| H | 1.46224  | 5.44666  | -4.57596 |
| H | 5.70485  | -0.34290 | -4.52588 |
| C | -0.27745 | -0.12408 | 2.13636  |
| C | 0.94650  | 0.21825  | 2.89157  |

|    |          |          |         |
|----|----------|----------|---------|
| C  | -1.59682 | 0.13243  | 2.77201 |
| C  | 2.11242  | -0.56479 | 2.76105 |
| C  | 1.02552  | 1.39430  | 3.66842 |
| C  | -2.77411 | 0.13237  | 1.99403 |
| C  | -1.74200 | 0.27547  | 4.17278 |
| C  | 3.27812  | -0.24062 | 3.43327 |
| H  | 2.08666  | -1.42550 | 2.10557 |
| C  | 2.19336  | 1.72802  | 4.34569 |
| H  | 0.17346  | 2.06194  | 3.72760 |
| C  | -4.02744 | 0.26330  | 2.58274 |
| H  | -2.70653 | 0.01376  | 0.92598 |
| C  | -2.99318 | 0.42893  | 4.76116 |
| H  | -0.86782 | 0.24015  | 4.81199 |
| C  | 3.32481  | 0.90345  | 4.25028 |
| H  | 4.16160  | -0.86139 | 3.33039 |
| H  | 2.23258  | 2.62586  | 4.95416 |
| C  | -4.14264 | 0.41788  | 3.96511 |
| H  | -4.91552 | 0.25655  | 1.95952 |
| H  | -3.07985 | 0.54776  | 5.83625 |
| H  | -2.76724 | -4.15350 | 3.45881 |
| C  | -2.41071 | -3.12580 | 3.31732 |
| Si | -0.55868 | -3.13194 | 2.98773 |
| H  | -2.68417 | -2.54895 | 4.20461 |
| H  | -2.94306 | -2.68641 | 2.46951 |
| C  | 0.43588  | -3.18711 | 4.58267 |
| C  | -0.03387 | -4.46169 | 1.77211 |
| H  | -0.26111 | -1.73316 | 2.30293 |
| C  | 1.72238  | -3.75829 | 4.60934 |
| C  | -0.06746 | -2.66575 | 5.79141 |
| H  | -0.35438 | -4.21477 | 0.75836 |
| H  | 1.05327  | -4.56345 | 1.74219 |
| H  | -0.45674 | -5.43220 | 2.06033 |
| C  | 2.47816  | -3.80329 | 5.78041 |
| H  | 2.13731  | -4.18511 | 3.70265 |
| C  | 0.68309  | -2.70629 | 6.96705 |
| H  | -1.06181 | -2.22867 | 5.82150 |
| H  | 3.46764  | -4.25269 | 5.77040 |
| C  | 1.95982  | -3.27255 | 6.96324 |
| H  | 0.27112  | -2.30004 | 7.88712 |
| H  | 2.54558  | -3.30323 | 7.87796 |
| H  | -4.19905 | 2.26005  | 0.36805 |
| H  | 1.74300  | 4.16615  | 1.10836 |
| H  | 4.26687  | -1.95285 | 0.58237 |
| C  | -5.50617 | 0.49566  | 4.59976 |

|   |          |          |         |
|---|----------|----------|---------|
| F | -5.99731 | -0.74003 | 4.85337 |
| F | -5.47832 | 1.15949  | 5.77526 |
| F | -6.39806 | 1.11666  | 3.79937 |
| C | 4.51950  | 1.22255  | 4.97291 |
| N | 5.49142  | 1.47819  | 5.55988 |

**TS-4'**

|    |          |          |          |
|----|----------|----------|----------|
| Rh | -0.01585 | -0.02240 | 0.06489  |
| Rh | -0.10705 | 0.47340  | -2.53354 |
| P  | 2.16631  | 1.94855  | -1.05833 |
| P  | 1.64910  | -1.97676 | -1.73344 |
| P  | -2.35549 | -1.36258 | -1.47039 |
| P  | -1.78048 | 2.44167  | -0.78131 |
| O  | 1.39560  | 1.49200  | 0.18295  |
| O  | 1.50866  | 1.82401  | -2.41928 |
| O  | 2.57400  | 3.52523  | -0.88876 |
| O  | 3.59449  | 1.12149  | -0.97877 |
| O  | 1.49440  | -1.43795 | -0.30245 |
| O  | 1.19769  | -1.13080 | -2.90560 |
| O  | 3.22326  | -2.30747 | -2.06477 |
| O  | 0.90609  | -3.44503 | -1.66003 |
| O  | -1.49048 | -1.49168 | -0.20558 |
| O  | -1.69893 | -0.87630 | -2.75087 |
| O  | -3.62504 | -0.43171 | -1.02318 |
| O  | -3.00682 | -2.82676 | -1.85044 |
| O  | -1.50175 | 1.43426  | 0.34160  |
| O  | -1.37665 | 2.08944  | -2.20465 |
| O  | -3.38481 | 2.76330  | -0.90744 |
| O  | -1.07061 | 3.83340  | -0.26638 |
| C  | 5.58671  | 3.56031  | -0.70932 |
| C  | 4.56918  | 3.70887  | 0.37864  |
| C  | 3.16974  | 3.77857  | 0.27660  |
| C  | 2.43548  | 3.99792  | 1.39496  |
| C  | 3.05375  | 4.10211  | 2.65590  |
| C  | 4.44209  | 3.94531  | 2.77271  |
| H  | 4.92363  | 3.97676  | 3.74071  |
| C  | 5.18103  | 3.72404  | 1.61094  |
| C  | 6.63247  | 3.43196  | 1.51869  |
| H  | 6.92264  | 2.61538  | 2.21245  |
| H  | 7.21693  | 4.35197  | 1.73408  |
| C  | 6.80930  | 2.99245  | 0.05489  |
| H  | 7.78130  | 3.34106  | -0.35818 |
| H  | 6.79670  | 1.87943  | 0.01544  |
| C  | 5.21445  | 2.71984  | -1.89157 |



|   |          |          |          |
|---|----------|----------|----------|
| C | 4.44363  | 1.45701  | -1.95160 |
| C | 4.41700  | 0.77454  | -3.17849 |
| H | 3.85146  | -0.13972 | -3.27814 |
| C | 5.03794  | 1.32072  | -4.31371 |
| C | 5.66434  | 2.57455  | -4.25953 |
| H | 6.09676  | 3.00528  | -5.15346 |
| C | 5.72227  | 3.26199  | -3.04646 |
| C | 6.32311  | 4.59935  | -2.81999 |
| H | 5.89659  | 5.35020  | -3.51949 |
| H | 7.42669  | 4.54190  | -2.93620 |
| C | 5.93742  | 4.91981  | -1.36625 |
| H | 6.75543  | 5.45945  | -0.84021 |
| H | 5.04069  | 5.58018  | -1.37579 |
| C | 3.20009  | -5.36993 | -2.20322 |
| C | 3.68342  | -4.44757 | -1.12184 |
| C | 3.81231  | -3.04863 | -1.12915 |
| C | 4.48346  | -2.42809 | -0.05954 |
| C | 4.94498  | -3.19172 | 1.02452  |
| C | 4.69882  | -4.57074 | 1.06993  |
| H | 5.00251  | -5.15494 | 1.92884  |
| C | 4.05335  | -5.17411 | -0.01098 |
| C | 3.67210  | -6.60382 | -0.12678 |
| H | 4.58312  | -7.22792 | -0.24954 |
| H | 3.09046  | -6.93779 | 0.75862  |
| C | 2.80678  | -6.63349 | -1.39824 |
| H | 1.73534  | -6.57261 | -1.10003 |
| H | 2.95519  | -7.57680 | -1.96854 |
| C | 2.09423  | -4.90805 | -3.10692 |
| C | 0.97751  | -4.11093 | -2.81052 |
| C | 0.00719  | -3.90929 | -3.81026 |
| H | -0.86770 | -3.30881 | -3.60451 |
| C | 0.19348  | -4.44167 | -5.09608 |
| C | 1.36226  | -5.15173 | -5.40048 |
| H | 1.53460  | -5.52187 | -6.40289 |
| C | 2.30568  | -5.35815 | -4.39216 |
| C | 3.62870  | -6.00956 | -4.54751 |
| H | 4.19232  | -5.56892 | -5.39799 |
| H | 3.49628  | -7.10314 | -4.69286 |
| C | 4.32838  | -5.70922 | -3.21208 |
| H | 4.99057  | -4.82465 | -3.35130 |
| H | 4.96164  | -6.56404 | -2.88733 |
| C | -5.94546 | -2.33572 | -0.96872 |
| C | -5.61631 | -1.28071 | -1.97879 |
| C | -4.56385 | -0.35717 | -1.96557 |

|   |          |          |          |
|---|----------|----------|----------|
| C | -4.45675 | 0.55748  | -3.03282 |
| H | -3.65054 | 1.27350  | -3.06221 |
| C | -5.37351 | 0.51945  | -4.09529 |
| C | -6.37880 | -0.45484 | -4.12138 |
| H | -7.05760 | -0.52127 | -4.96184 |
| C | -6.46737 | -1.35675 | -3.05996 |
| C | -7.38338 | -2.51773 | -2.97283 |
| H | -7.35635 | -3.11808 | -3.90781 |
| H | -8.41713 | -2.16777 | -2.76435 |
| C | -6.82156 | -3.32125 | -1.79023 |
| H | -7.63959 | -3.78085 | -1.19291 |
| H | -6.19076 | -4.14554 | -2.19419 |
| C | -4.81283 | -3.05195 | -0.28997 |
| C | -3.55229 | -3.43576 | -0.79584 |
| C | -2.78730 | -4.37352 | -0.07547 |
| H | -1.84283 | -4.71358 | -0.48146 |
| C | -3.19426 | -4.82457 | 1.12584  |
| C | -4.42828 | -4.28810 | 1.74042  |
| H | -4.72862 | -4.58178 | 2.73767  |
| C | -5.19084 | -3.40150 | 0.98645  |
| C | -6.45688 | -2.74326 | 1.39858  |
| H | -6.32728 | -2.18636 | 2.35114  |
| H | -7.26211 | -3.50231 | 1.49832  |
| C | -6.74678 | -1.78112 | 0.23318  |
| H | -6.37070 | -0.76857 | 0.50367  |
| H | -7.83749 | -1.70444 | 0.02953  |
| C | -3.55109 | 5.73095  | -0.16473 |
| C | -3.90336 | 4.51226  | 0.63009  |
| C | -3.94543 | 3.16710  | 0.23069  |
| C | -4.57325 | 2.24499  | 1.08467  |
| C | -5.06376 | 2.67516  | 2.32846  |
| C | -4.86528 | 4.00177  | 2.74499  |
| H | -5.18969 | 4.31650  | 3.72870  |
| C | -4.28393 | 4.87438  | 1.90608  |
| C | -3.99232 | 6.30455  | 2.18540  |
| H | -4.94230 | 6.87404  | 2.27603  |
| H | -3.38259 | 6.41493  | 3.10804  |
| C | -3.19840 | 6.75154  | 0.94437  |
| H | -2.11076 | 6.69549  | 1.17686  |
| H | -3.43955 | 7.80026  | 0.66306  |
| C | -2.47689 | 5.60461  | -1.19768 |
| C | -1.21245 | 4.83849  | -1.13157 |
| C | -0.29658 | 5.00927  | -2.18638 |
| H | 0.63322  | 4.46304  | -2.18824 |

|    |          |          |          |
|----|----------|----------|----------|
| C  | -0.59869 | 5.79395  | -3.24017 |
| C  | -1.84501 | 6.43637  | -3.32947 |
| H  | -2.09029 | 7.02746  | -4.20253 |
| C  | -2.76583 | 6.30161  | -2.28543 |
| C  | -4.12976 | 6.88488  | -2.24956 |
| H  | -4.70186 | 6.61681  | -3.16394 |
| H  | -4.06678 | 7.98878  | -2.13828 |
| C  | -4.75045 | 6.23792  | -1.00419 |
| H  | -5.39855 | 6.95610  | -0.45520 |
| H  | -5.38237 | 5.37957  | -1.32736 |
| H  | -2.60489 | -5.55570 | 1.65830  |
| H  | -5.56820 | 1.97632  | 2.97914  |
| H  | 2.45210  | 4.26035  | 3.54140  |
| H  | 5.44965  | -2.70601 | 1.84964  |
| H  | -0.54869 | -4.26881 | -5.86450 |
| H  | -5.27944 | 1.21991  | -4.91488 |
| H  | 0.11045  | 5.89559  | -4.05181 |
| H  | 4.98724  | 0.79066  | -5.25594 |
| C  | 0.11036  | -0.30340 | 2.15772  |
| C  | 1.33734  | 0.11872  | 2.89022  |
| C  | -1.20063 | -0.15770 | 2.83075  |
| C  | 2.58887  | 0.11160  | 2.23602  |
| C  | 1.32326  | 0.46477  | 4.26186  |
| C  | -2.17497 | -1.17376 | 2.78843  |
| C  | -1.54187 | 1.05235  | 3.47679  |
| C  | 3.76004  | 0.45028  | 2.90977  |
| H  | 2.64139  | -0.18613 | 1.19996  |
| C  | 2.48901  | 0.80816  | 4.93530  |
| H  | 0.39130  | 0.45488  | 4.81347  |
| C  | -3.37298 | -1.05246 | 3.47507  |
| H  | -1.97502 | -2.07334 | 2.22249  |
| C  | -2.74491 | 1.18565  | 4.15857  |
| H  | -0.85839 | 1.89296  | 3.43802  |
| C  | 3.71461  | 0.79472  | 4.26133  |
| H  | 4.70744  | 0.43857  | 2.38157  |
| H  | 2.45227  | 1.07162  | 5.98789  |
| C  | -3.65596 | 0.11665  | 4.20001  |
| H  | -4.08455 | -1.87032 | 3.47933  |
| H  | -2.97835 | 2.11278  | 4.67263  |
| H  | 1.46023  | -5.38126 | 1.80198  |
| C  | 0.80534  | -4.55096 | 1.51045  |
| Si | 0.77471  | -3.27409 | 2.88438  |
| H  | -0.18524 | -4.96138 | 1.30187  |
| H  | 1.17147  | -4.11581 | 0.57894  |

|   |          |          |          |
|---|----------|----------|----------|
| C | -0.43465 | -3.70757 | 4.25499  |
| C | 2.48002  | -2.96118 | 3.61189  |
| H | 0.31167  | -1.86218 | 2.24791  |
| C | -0.60186 | -2.86897 | 5.37560  |
| C | -1.17632 | -4.90282 | 4.21852  |
| H | 3.13426  | -2.42906 | 2.92028  |
| H | 2.43226  | -2.37961 | 4.53711  |
| H | 2.93907  | -3.93051 | 3.84613  |
| C | -1.48800 | -3.19754 | 6.40018  |
| H | -0.03518 | -1.94427 | 5.45107  |
| C | -2.06250 | -5.23943 | 5.24344  |
| H | -1.04685 | -5.59445 | 3.39144  |
| H | -1.60585 | -2.53124 | 7.25043  |
| C | -2.22636 | -4.38203 | 6.33227  |
| H | -2.62225 | -6.16950 | 5.19128  |
| H | -2.92087 | -4.63696 | 7.12815  |
| H | -4.66607 | 1.20590  | 0.79988  |
| H | 1.35590  | 4.05594  | 1.33064  |
| H | 4.61433  | -1.35366 | -0.05103 |
| C | 4.97047  | 1.07741  | 5.04249  |
| F | 4.84807  | 2.19527  | 5.79213  |
| F | 5.24545  | 0.06465  | 5.89793  |
| F | 6.04757  | 1.23209  | 4.24769  |
| C | -4.85540 | 0.20776  | 4.97718  |
| N | -5.82730 | 0.27592  | 5.61392  |

**TS-5'**

|    |          |          |          |
|----|----------|----------|----------|
| Rh | -0.20388 | 0.06083  | 0.09410  |
| Rh | -0.29593 | 0.50186  | -2.51130 |
| P  | 2.59458  | 0.36663  | -1.29895 |
| P  | -0.20981 | -2.51843 | -1.66653 |
| P  | -3.07766 | 0.25665  | -1.16141 |
| P  | -0.15503 | 3.07080  | -0.83851 |
| O  | 1.85415  | 0.37925  | 0.04206  |
| O  | 1.79765  | 0.54131  | -2.58067 |
| O  | 3.72182  | 1.55397  | -1.34606 |
| O  | 3.43372  | -1.05104 | -1.28751 |
| O  | 0.10212  | -1.98432 | -0.26093 |
| O  | -0.24577 | -1.56362 | -2.84312 |
| O  | 0.86891  | -3.67044 | -2.11703 |
| O  | -1.62565 | -3.33673 | -1.46408 |
| O  | -2.27758 | -0.36438 | -0.00637 |
| O  | -2.39635 | 0.48333  | -2.49529 |
| O  | -3.67233 | 1.63543  | -0.48585 |

|   |          |          |          |
|---|----------|----------|----------|
| O | -4.38746 | -0.66109 | -1.54097 |
| O | -0.45615 | 2.12475  | 0.33517  |
| O | -0.41457 | 2.58068  | -2.25283 |
| O | -1.04542 | 4.44520  | -0.68150 |
| O | 1.40295  | 3.53111  | -0.62350 |
| C | 6.36242  | 0.11609  | -1.62129 |
| C | 5.76385  | 0.78172  | -0.42288 |
| C | 4.57287  | 1.51837  | -0.32245 |
| C | 4.28641  | 2.15610  | 0.83769  |
| C | 5.14264  | 2.04763  | 1.95033  |
| C | 6.27955  | 1.22951  | 1.88589  |
| H | 6.92004  | 1.10060  | 2.74822  |
| C | 6.55636  | 0.58064  | 0.68331  |
| C | 7.65699  | -0.37748 | 0.41637  |
| H | 7.67146  | -1.19148 | 1.17195  |
| H | 8.62974  | 0.15923  | 0.40358  |
| C | 7.30979  | -0.92832 | -0.97836 |
| H | 8.22628  | -1.11359 | -1.58061 |
| H | 6.77562  | -1.89763 | -0.85437 |
| C | 5.42340  | -0.49647 | -2.61269 |
| C | 4.16118  | -1.23718 | -2.39068 |
| C | 3.60859  | -1.91210 | -3.49063 |
| H | 2.68277  | -2.45580 | -3.38221 |
| C | 4.19145  | -1.80171 | -4.76384 |
| C | 5.31560  | -0.98936 | -4.97368 |
| H | 5.72595  | -0.87512 | -5.96873 |
| C | 5.90095  | -0.33369 | -3.88980 |
| C | 7.08102  | 0.56441  | -3.93506 |
| H | 6.92619  | 1.38774  | -4.66520 |
| H | 7.99029  | -0.01962 | -4.19362 |
| C | 7.16554  | 1.10936  | -2.49943 |
| H | 8.22219  | 1.22439  | -2.17174 |
| H | 6.68547  | 2.11397  | -2.47315 |
| C | -0.83695 | -6.21436 | -2.07560 |
| C | 0.19137  | -5.71629 | -1.10132 |
| C | 1.05120  | -4.60862 | -1.19054 |
| C | 2.04070  | -4.44178 | -0.20347 |
| C | 2.11332  | -5.32773 | 0.88361  |
| C | 1.17922  | -6.36466 | 1.00987  |
| H | 1.19265  | -7.01308 | 1.87640  |
| C | 0.21411  | -6.52534 | 0.01388  |
| C | -0.91688 | -7.48630 | 0.02934  |
| H | -0.53774 | -8.51930 | -0.12415 |
| H | -1.48504 | -7.41646 | 0.98201  |

|   |          |          |          |
|---|----------|----------|----------|
| C | -1.78145 | -7.02992 | -1.15880 |
| H | -2.59460 | -6.37245 | -0.77508 |
| H | -2.24998 | -7.89562 | -1.67661 |
| C | -1.58285 | -5.21848 | -2.91691 |
| C | -2.03283 | -3.93017 | -2.58427 |
| C | -2.80125 | -3.21903 | -3.52566 |
| H | -3.15711 | -2.22474 | -3.29565 |
| C | -3.06357 | -3.77089 | -4.78939 |
| C | -2.53332 | -5.02051 | -5.13436 |
| H | -2.69133 | -5.42960 | -6.12389 |
| C | -1.78165 | -5.71747 | -4.18656 |
| C | -1.07521 | -7.00282 | -4.40248 |
| H | -0.44781 | -6.96365 | -5.31898 |
| H | -1.81212 | -7.83167 | -4.47011 |
| C | -0.20142 | -7.14033 | -3.14602 |
| H | 0.82616  | -6.78720 | -3.39073 |
| H | -0.13015 | -8.20112 | -2.81904 |
| C | -6.64074 | 1.11432  | -0.37550 |
| C | -5.86281 | 1.98911  | -1.31118 |
| C | -4.49564 | 2.29188  | -1.29861 |
| C | -3.99611 | 3.20632  | -2.24527 |
| H | -2.94645 | 3.45807  | -2.25754 |
| C | -4.84974 | 3.76388  | -3.21053 |
| C | -6.19860 | 3.38851  | -3.25640 |
| H | -6.85165 | 3.77948  | -4.02591 |
| C | -6.67775 | 2.48595  | -2.30502 |
| C | -8.04220 | 1.91101  | -2.25092 |
| H | -8.34120 | 1.50087  | -3.23964 |
| H | -8.76495 | 2.68554  | -1.91578 |
| C | -7.91051 | 0.78900  | -1.20929 |
| H | -8.83072 | 0.70651  | -0.58990 |
| H | -7.77427 | -0.17633 | -1.74789 |
| C | -5.99802 | -0.13842 | 0.14871  |
| C | -5.10812 | -1.02979 | -0.48278 |
| C | -4.90421 | -2.30563 | 0.07909  |
| H | -4.26257 | -3.01542 | -0.42674 |
| C | -5.46806 | -2.64464 | 1.25350  |
| C | -6.27019 | -1.65064 | 2.00295  |
| H | -6.66833 | -1.87904 | 2.98280  |
| C | -6.48502 | -0.41179 | 1.40620  |
| C | -7.24078 | 0.73207  | 1.97630  |
| H | -6.82519 | 1.03002  | 2.96308  |
| H | -8.31582 | 0.46700  | 2.06908  |
| C | -7.03414 | 1.84372  | 0.93156  |

|   |          |          |          |
|---|----------|----------|----------|
| H | -6.19669 | 2.49756  | 1.26552  |
| H | -7.94468 | 2.47272  | 0.82039  |
| C | 1.09833  | 6.54545  | 0.01127  |
| C | 0.12628  | 5.81627  | 0.88882  |
| C | -0.95172 | 4.98512  | 0.53480  |
| C | -1.84517 | 4.59967  | 1.54883  |
| C | -1.58791 | 4.96653  | 2.88101  |
| C | -0.42334 | 5.68270  | 3.20141  |
| H | -0.19555 | 5.91406  | 4.23424  |
| C | 0.40126  | 6.07513  | 2.21669  |
| C | 1.68766  | 6.79966  | 2.38572  |
| H | 1.49456  | 7.83906  | 2.72813  |
| H | 2.35264  | 6.27081  | 3.10237  |
| C | 2.28951  | 6.78799  | 0.96938  |
| H | 3.01130  | 5.94281  | 0.89646  |
| H | 2.83754  | 7.73105  | 0.75209  |
| C | 1.51118  | 5.88168  | -1.26318 |
| C | 1.79690  | 4.45138  | -1.50429 |
| C | 2.25154  | 4.08659  | -2.78642 |
| H | 2.45357  | 3.05185  | -3.01802 |
| C | 2.38216  | 5.01233  | -3.75778 |
| C | 2.03502  | 6.35469  | -3.52942 |
| H | 2.10446  | 7.07768  | -4.33205 |
| C | 1.58428  | 6.74446  | -2.26388 |
| C | 1.12518  | 8.10368  | -1.88597 |
| H | 0.35954  | 8.47808  | -2.59939 |
| H | 1.99195  | 8.79790  | -1.84455 |
| C | 0.51888  | 7.89173  | -0.49206 |
| H | 0.74670  | 8.74668  | 0.18194  |
| H | -0.58783 | 7.81968  | -0.59423 |
| H | -5.29094 | -3.62398 | 1.67857  |
| H | -2.26535 | 4.66286  | 3.66737  |
| H | 4.90186  | 2.56588  | 2.86918  |
| H | 2.86324  | -5.18206 | 1.64995  |
| H | -3.64281 | -3.21191 | -5.51269 |
| H | -4.45688 | 4.45714  | -3.94280 |
| H | 2.71975  | 4.71121  | -4.74130 |
| H | 3.73574  | -2.30860 | -5.60449 |
| C | -0.11342 | -0.11471 | 2.19977  |
| C | 1.23965  | -0.42430 | 2.70922  |
| C | -1.03563 | 0.64250  | 3.09186  |
| C | 1.89042  | -1.61876 | 2.33552  |
| C | 1.96247  | 0.50295  | 3.48728  |
| C | -2.17925 | 1.28094  | 2.56698  |

|    |          |          |          |
|----|----------|----------|----------|
| C  | -0.86762 | 0.65687  | 4.49797  |
| C  | 3.16543  | -1.91315 | 2.78883  |
| H  | 1.37499  | -2.30258 | 1.67351  |
| C  | 3.24782  | 0.20967  | 3.94062  |
| H  | 1.52619  | 1.46638  | 3.72590  |
| C  | -3.10186 | 1.90780  | 3.39600  |
| H  | -2.35323 | 1.27338  | 1.50430  |
| C  | -1.77150 | 1.30138  | 5.33310  |
| H  | -0.03197 | 0.13224  | 4.94535  |
| C  | 3.84384  | -1.00680 | 3.61331  |
| H  | 3.64487  | -2.84274 | 2.49952  |
| H  | 3.78230  | 0.92678  | 4.55398  |
| C  | -2.90096 | 1.93410  | 4.78477  |
| H  | -3.97896 | 2.38185  | 2.96735  |
| H  | -1.61993 | 1.30643  | 6.40784  |
| H  | -3.97485 | -2.64340 | 3.87136  |
| C  | -3.21667 | -1.88362 | 3.64506  |
| Si | -1.63657 | -2.71205 | 3.05097  |
| H  | -3.07132 | -1.27454 | 4.54082  |
| H  | -3.60477 | -1.22483 | 2.86334  |
| C  | -0.58642 | -3.33661 | 4.47952  |
| C  | -1.95049 | -4.04424 | 1.76758  |
| H  | -0.81160 | -1.55498 | 2.34380  |
| C  | 0.40296  | -4.31687 | 4.26936  |
| C  | -0.75729 | -2.85767 | 5.79364  |
| H  | -2.20031 | -3.61176 | 0.79687  |
| H  | -1.06477 | -4.66816 | 1.62838  |
| H  | -2.76992 | -4.69599 | 2.09603  |
| C  | 1.18798  | -4.79766 | 5.31639  |
| H  | 0.56025  | -4.71672 | 3.27266  |
| C  | 0.02411  | -3.33541 | 6.84684  |
| H  | -1.51619 | -2.10906 | 6.00418  |
| H  | 1.94340  | -5.55497 | 5.12455  |
| C  | 1.00034  | -4.30514 | 6.60961  |
| H  | -0.13144 | -2.95438 | 7.85280  |
| H  | 1.61010  | -4.67698 | 7.42859  |
| H  | -2.70297 | 3.98394  | 1.31158  |
| H  | 3.38131  | 2.74197  | 0.92733  |
| H  | 2.72358  | -3.60342 | -0.25639 |
| C  | 5.18654  | -1.39114 | 4.16767  |
| F  | 5.82012  | -0.35314 | 4.75398  |
| F  | 6.00300  | -1.87817 | 3.20562  |
| F  | 5.07206  | -2.36508 | 5.10266  |
| C  | -3.84739 | 2.58980  | 5.63874  |



|              |          |          |          |
|--------------|----------|----------|----------|
| N            | -4.61705 | 3.12202  | 6.32993  |
| <b>TS-6'</b> |          |          |          |
| Rh           | 0.18256  | 0.01034  | 0.05651  |
| Rh           | 0.57603  | 0.49465  | -2.51560 |
| P            | 2.39582  | 2.12882  | -0.62155 |
| P            | 2.29658  | -1.82976 | -1.35765 |
| P            | -1.70475 | -1.49286 | -1.89134 |
| P            | -1.54404 | 2.33282  | -1.14695 |
| O            | 1.39570  | 1.64824  | 0.43317  |
| O            | 2.05874  | 1.93970  | -2.08713 |
| O            | 2.67986  | 3.72897  | -0.41207 |
| O            | 3.80753  | 1.38257  | -0.20047 |
| O            | 1.83351  | -1.29256 | 0.00541  |
| O            | 2.02768  | -1.01977 | -2.60836 |
| O            | 3.92295  | -2.06279 | -1.36735 |
| O            | 1.64793  | -3.34274 | -1.40292 |
| O            | -1.08571 | -1.56781 | -0.48513 |
| O            | -0.85726 | -0.95535 | -3.03191 |
| O            | -3.09745 | -0.65362 | -1.70309 |
| O            | -2.17625 | -2.99921 | -2.36290 |
| O            | -1.44331 | 1.33070  | 0.01027  |
| O            | -0.84451 | 2.01837  | -2.46068 |
| O            | -3.10790 | 2.57080  | -1.58570 |
| O            | -1.03242 | 3.75433  | -0.49789 |
| C            | 5.54368  | 3.89292  | 0.56681  |
| C            | 4.26311  | 4.01571  | 1.33409  |
| C            | 2.94026  | 4.03966  | 0.85850  |
| C            | 1.92865  | 4.26172  | 1.73338  |
| C            | 2.18231  | 4.40704  | 3.11062  |
| C            | 3.48998  | 4.28622  | 3.60044  |
| H            | 3.69041  | 4.34038  | 4.66245  |
| C            | 4.51891  | 4.06370  | 2.68559  |
| C            | 5.94461  | 3.79417  | 2.99524  |
| H            | 6.04347  | 2.98609  | 3.75080  |
| H            | 6.43615  | 4.72436  | 3.35222  |
| C            | 6.51929  | 3.34736  | 1.63918  |
| H            | 7.56245  | 3.70770  | 1.50179  |
| H            | 6.53052  | 2.23404  | 1.60832  |
| C            | 5.53124  | 3.05518  | -0.67445 |
| C            | 4.84367  | 1.77304  | -0.94241 |
| C            | 5.14465  | 1.11364  | -2.14466 |
| H            | 4.65038  | 0.18599  | -2.39276 |
| C            | 6.01963  | 1.69435  | -3.07704 |

|   |          |          |          |
|---|----------|----------|----------|
| C | 6.58116  | 2.95915  | -2.84755 |
| H | 7.21778  | 3.41480  | -3.59501 |
| C | 6.30754  | 3.62657  | -1.65258 |
| C | 6.79345  | 4.97348  | -1.26633 |
| H | 6.54844  | 5.72381  | -2.04866 |
| H | 7.88962  | 4.94205  | -1.08714 |
| C | 6.02984  | 5.26659  | 0.03557  |
| H | 6.66837  | 5.81390  | 0.76347  |
| H | 5.15533  | 5.91243  | -0.20631 |
| C | 4.11888  | -5.11974 | -1.43762 |
| C | 4.31781  | -4.15791 | -0.30216 |
| C | 4.35720  | -2.75357 | -0.31526 |
| C | 4.74362  | -2.07961 | 0.85805  |
| C | 5.00312  | -2.79912 | 2.03527  |
| C | 4.84445  | -4.19130 | 2.05884  |
| H | 4.99087  | -4.74526 | 2.97695  |
| C | 4.49007  | -4.84754 | 0.87850  |
| C | 4.23096  | -6.30021 | 0.71940  |
| H | 5.18516  | -6.86381 | 0.79894  |
| H | 3.50249  | -6.66458 | 1.47452  |
| C | 3.64807  | -6.39829 | -0.70054 |
| H | 2.53661  | -6.40442 | -0.62792 |
| H | 3.96775  | -7.33561 | -1.20678 |
| C | 3.19046  | -4.73716 | -2.55333 |
| C | 1.98998  | -4.01106 | -2.50234 |
| C | 1.22968  | -3.87968 | -3.67975 |
| H | 0.29630  | -3.33457 | -3.66526 |
| C | 1.70214  | -4.40984 | -4.89105 |
| C | 2.94922  | -5.04655 | -4.94106 |
| H | 3.34110  | -5.41362 | -5.88085 |
| C | 3.68223  | -5.18377 | -3.76070 |
| C | 5.04645  | -5.75146 | -3.63488 |
| H | 5.74158  | -5.28356 | -4.36493 |
| H | 5.01199  | -6.85247 | -3.78043 |
| C | 5.44485  | -5.39589 | -2.19327 |
| H | 6.06721  | -4.47258 | -2.21616 |
| H | 6.05014  | -6.20621 | -1.73043 |
| C | -5.25140 | -2.71581 | -2.05342 |
| C | -4.80978 | -1.64467 | -3.00162 |
| C | -3.84576 | -0.64807 | -2.80543 |
| C | -3.60476 | 0.27054  | -3.84697 |
| H | -2.86079 | 1.04372  | -3.73411 |
| C | -4.29893 | 0.16348  | -5.06258 |
| C | -5.20916 | -0.88175 | -5.26245 |

|   |          |          |          |
|---|----------|----------|----------|
| H | -5.71024 | -0.99916 | -6.21466 |
| C | -5.43318 | -1.78513 | -4.22234 |
| C | -6.26600 | -3.00861 | -4.28955 |
| H | -6.01997 | -3.60934 | -5.19172 |
| H | -7.34232 | -2.73275 | -4.28684 |
| C | -5.88484 | -3.76503 | -3.00766 |
| H | -6.76755 | -4.27901 | -2.56740 |
| H | -5.13315 | -4.54390 | -3.27000 |
| C | -4.22024 | -3.34409 | -1.15986 |
| C | -2.86314 | -3.63819 | -1.41352 |
| C | -2.17767 | -4.49778 | -0.53295 |
| H | -1.15129 | -4.76879 | -0.74639 |
| C | -2.76520 | -4.95418 | 0.58897  |
| C | -4.12803 | -4.50489 | 0.94820  |
| H | -4.58454 | -4.79944 | 1.88409  |
| C | -4.80202 | -3.69881 | 0.03616  |
| C | -6.16706 | -3.13407 | 0.18798  |
| H | -6.25954 | -2.55701 | 1.13265  |
| H | -6.91926 | -3.95119 | 0.15667  |
| C | -6.30302 | -2.21179 | -1.03587 |
| H | -6.06132 | -1.17007 | -0.72604 |
| H | -7.33887 | -2.22210 | -1.44069 |
| C | -3.60676 | 5.49182  | -0.80447 |
| C | -4.02213 | 4.22251  | -0.12729 |
| C | -3.90353 | 2.89504  | -0.56826 |
| C | -4.60554 | 1.90146  | 0.13459  |
| C | -5.33244 | 2.24771  | 1.28436  |
| C | -5.30011 | 3.56567  | 1.76918  |
| H | -5.80860 | 3.81783  | 2.69107  |
| C | -4.64224 | 4.50676  | 1.07231  |
| C | -4.49264 | 5.93720  | 1.44618  |
| H | -5.47658 | 6.44991  | 1.38325  |
| H | -4.06427 | 6.04023  | 2.46653  |
| C | -3.51910 | 6.47991  | 0.38372  |
| H | -2.48870 | 6.47139  | 0.80607  |
| H | -3.76888 | 7.52568  | 0.09909  |
| C | -2.35978 | 5.46670  | -1.63095 |
| C | -1.08326 | 4.76816  | -1.36198 |
| C | -0.00895 | 5.02013  | -2.23503 |
| H | 0.93715  | 4.52351  | -2.08476 |
| C | -0.16730 | 5.82364  | -3.30588 |
| C | -1.41346 | 6.40459  | -3.59602 |
| H | -1.53602 | 7.01225  | -4.48341 |
| C | -2.49339 | 6.18595  | -2.73422 |

|    |          |          |          |
|----|----------|----------|----------|
| C  | -3.87407 | 6.69472  | -2.92563 |
| H  | -4.25940 | 6.43154  | -3.93437 |
| H  | -3.89627 | 7.79547  | -2.77460 |
| C  | -4.66611 | 5.96997  | -1.82913 |
| H  | -5.44008 | 6.63310  | -1.38367 |
| H  | -5.18241 | 5.09423  | -2.28416 |
| H  | -2.23111 | -5.62303 | 1.24686  |
| H  | -5.89106 | 1.49014  | 1.81380  |
| H  | 1.36105  | 4.56442  | 3.79754  |
| H  | 5.28366  | -2.27216 | 2.93803  |
| H  | 1.11993  | -4.29130 | -5.79556 |
| H  | -4.10175 | 0.86737  | -5.86062 |
| H  | 0.66535  | 5.98971  | -3.97748 |
| H  | 6.22553  | 1.18044  | -4.00700 |
| C  | -0.05874 | -0.23615 | 2.14700  |
| C  | 1.01773  | 0.24906  | 3.06444  |
| C  | -1.47024 | -0.11517 | 2.58154  |
| C  | 2.35598  | 0.29076  | 2.61266  |
| C  | 0.77795  | 0.61253  | 4.40925  |
| C  | -2.40243 | -1.13763 | 2.31819  |
| C  | -1.94591 | 1.05597  | 3.21135  |
| C  | 3.39060  | 0.70908  | 3.43942  |
| H  | 2.58339  | -0.02633 | 1.60747  |
| C  | 1.80402  | 1.03785  | 5.24515  |
| H  | -0.22370 | 0.55357  | 4.81627  |
| C  | -3.69740 | -1.07324 | 2.81243  |
| H  | -2.08966 | -1.99914 | 1.74286  |
| C  | -3.24758 | 1.12601  | 3.70041  |
| H  | -1.29282 | 1.91492  | 3.31627  |
| C  | 3.12310  | 1.08917  | 4.76476  |
| H  | 4.40676  | 0.74206  | 3.05983  |
| H  | 1.59452  | 1.31474  | 6.27334  |
| C  | -4.11164 | 0.03880  | 3.55071  |
| H  | -4.37958 | -1.90039 | 2.65130  |
| H  | -3.58610 | 2.02192  | 4.21044  |
| H  | 1.66717  | -5.17124 | 2.17432  |
| C  | 1.02266  | -4.40020 | 1.73479  |
| Si | 0.55956  | -3.15043 | 3.05442  |
| H  | 0.14927  | -4.89486 | 1.30522  |
| H  | 1.55145  | -3.91838 | 0.91094  |
| C  | -0.92066 | -3.68799 | 4.07844  |
| C  | 2.01497  | -2.73495 | 4.17141  |
| H  | 0.16970  | -1.75951 | 2.30754  |
| C  | -1.53073 | -2.82923 | 5.01421  |

|   |          |          |          |
|---|----------|----------|----------|
| C | -1.43896 | -4.99099 | 3.95351  |
| H | 2.80753  | -2.19968 | 3.64534  |
| H | 1.71538  | -2.13107 | 5.03259  |
| H | 2.43046  | -3.67827 | 4.54992  |
| C | -2.63041 | -3.23991 | 5.76638  |
| H | -1.15642 | -1.81773 | 5.14822  |
| C | -2.53014 | -5.41352 | 4.71481  |
| H | -0.97933 | -5.69387 | 3.26389  |
| H | -3.10533 | -2.54679 | 6.45509  |
| C | -3.13510 | -4.53384 | 5.61382  |
| H | -2.90986 | -6.42540 | 4.60086  |
| H | -3.99503 | -4.85447 | 6.19573  |
| H | -4.57463 | 0.87113  | -0.18988 |
| H | 0.90500  | 4.28479  | 1.38211  |
| H | 4.80466  | -0.99931 | 0.86784  |
| C | -5.44106 | 0.01266  | 4.24831  |
| F | -5.90734 | 1.25119  | 4.51882  |
| F | -5.35383 | -0.63906 | 5.43738  |
| F | -6.38346 | -0.63196 | 3.52545  |
| C | 4.18766  | 1.50449  | 5.63010  |
| N | 5.05224  | 1.84024  | 6.33243  |

### 13. References

1. Bertoli, G.; Exner, B.; Evers, M. V.; Tschulik, K.; Gooßen, L. J. Metal-Free Trifluoromethylthiolation of Arenediazonium Salts with Me<sub>4</sub>NSCF<sub>3</sub>. *J. Fluorine Chem.* **2018**, *210*, 132–136.
2. Wakaki, T.; Togo, T.; Yoshidome, D.; Kuninobu, Y.; Kanai, M. Palladium-Catalyzed Synthesis of Diaryl Ketones from Aldehydes and (Hetero)aryl Halides via C–H Bond Activation. *ACS Catal.* **2018**, *8*, 3123–3128.
3. Wei, J.; Wang, B.; Qiu, J.; Zhang, X.; Chen, H.; Zhang, M. Preparation of Polymerizable Benzophenone Photoinitiator Containing Amine Group as Promoter. CN Patent 102212151, 2011.
4. Carmellino, M. L.; Pagani, G.; Pregolato, M.; Terreni, M.; Caprioli, V.; Zani, F. Studies on the Insecticidal Activities of Some New *N*-Benzoyl-*N'*-Arylureas. *Pestic. Sci.* **1995**, *45*, 227–236.
5. Sithebe, S.; Molefe, P. Base Free Suzuki Acylation Reactions of Sodium (aryl trihydroxyborate) Salts: A Novel Synthesis of Substituted Aryl Ketones. *J. Organomet. Chem.* **2017**, *846*, 305–311.
6. Dohi, S.; Moriyama, K.; Togo, H. Practical One-Pot Preparation of Ketones from Aryl and Alkyl Bromides with Aldehydes and DIH via Grignard Reagents. *Tetrahedron* **2012**, *68*, 6557–6564.
7. Zhou, Q.; Wei, S.; Han, W. In Situ Generation of Palladium Nanoparticles: Ligand-Free Palladium Catalyzed Pivalic Acid Assisted Carbonylative Suzuki Reactions at Ambient Conditions. *J. Org. Chem.* **2014**, *79*, 1454–1460.
8. Liebeskind, L. S.; Srogl, J. Thiol Ester–Boronic Acid Coupling. A Mechanistically Unprecedented and General Ketone Synthesis. *J. Am. Chem. Soc.* **2000**, *122*, 11260–11261.
9. Hu, M.; He, Z.; Gao, B.; Li, L.; Ni, C.; Hu, J. Copper-Catalyzed Gem-difluoroolefination of Diazo Compounds with TMSCF<sub>3</sub> via C–F Bond Cleavage. *J. Am. Chem. Soc.* **2013**, *135*, 17302–17305.
10. Lee, M.; Ko, S.; Chang, S. Highly Selective and Practical Hydrolytic Oxidation of

Organosilanes to Silanols Catalyzed by a Ruthenium Complex. *J. Am. Chem. Soc.* **2000**, *122*, 12011–12012.

11. Moitra, N.; Ichii, S.; Kamei, T.; Kanamori, K.; Zhu, Y.; Takeda, K.; Nakanishi, K.; Shimada, T. Surface Functionalization of Silica by Si–H Activation of Hydrosilanes. *J. Am. Chem. Soc.* **2014**, *136*, 11570–11573.

12. Xu, B.; Zhu, S.-F.; Zhang, Z.-C.; Yu, Z.-X.; Ma, Y.; Zhou, Q.-L. Highly Enantioselective S–H Bond Insertion Cooperatively Catalyzed by Dirhodium Complexes and Chiral Spiro Phosphoric Acids. *Chem. Sci.* **2014**, *5*, 1442–1448.

13. Zhu, S.-F.; Fu, Y.; Xie, J.-H.; Liu, B.; Xing, L.; Zhou, Q.-L. Synthesis of Chiral 4,4'-Disubstituted 1,1'-Spirobiindane-7,7'-diols and Related Phosphoramidites: The Substituent Effect of Siphos Ligands in Rh-Catalyzed Asymmetric Hydrogenation. *Tetrahedron: Asymmetry* **2003**, *14*, 3219–3224.

14. Wang, G.; Xu, L.; Li, P. Double N,B-Type Bidentate Boryl Ligands Enabling a Highly Active Iridium Catalyst for C–H Borylation. *J. Am. Chem. Soc.* **2015**, *137*, 8058–8061.

15. Fleming, I.; Henning, R.; Plaut, H. The Phenyltrimethylsilyl Group as a Masked Form of the Hydroxy Group. *J. Chem. Soc., Chem. Commun.* **1984**, 29–31.

16. Yamamoto, Y.; Kurihara, K.; Miyaura, N. Me-Bipam for Enantioselective Ruthenium(II)-Catalyzed Arylation of Aldehydes with Arylboronic Acids. *Angew. Chem. Int. Ed.* **2009**, *48*, 4414–4416.

17. Guzi, T. J.; Paruch, K.; Mallams, A. K.; Rivera, J. D.; Doll, R. J.; Girijavallabhan, V. M.; Pachter, J.; Liu, Y.-T.; Saksena, A. K. Preparation of Substituted 1-Benzhydryl-4-[2-(4-piperidinyl)acetyl]-piperazines as 17- $\beta$ -Hydroxysteroid Dehydrogenase Type 3 Inhibitors for the Treatment of Androgen Dependent Diseases. WO Patent 2003022835, 2003.

18. Ohkuma, T.; Koizumi, M.; Ikehira, H.; Yokozawa, T.; Noyori, R. Selective Hydrogenation of Benzophenones to Benzhydrols. Asymmetric Synthesis of Unsymmetrical Diarylmethanols. *Org. Lett.* **2000**, *2*, 659–662.

19. Infante, R.; Nieto, J.; Andrés, C. Asymmetric Additive-Free Aryl Addition to Aldehydes Using Perhydrobenzoxazines as Ligands and Boroxins as Aryl Source. *Org.*

*Biomol. Chem.* **2011**, *9*, 6691–6699.

20. He, W.-P.; Zhou, B.-H.; Zhou, Y.-L.; Li, X.-R.; Fan, L.-M.; Shou, H.-W.; Li, J. Synthesis of New Benzimidazolium Salts and Their Application in the Asymmetric Arylation of Aldehydes. *Tetrahedron Lett.* **2016**, *57*, 3152–3155.

21. Hu, W.; Yu, X.; Zhao, X.; Wu, B. Preparation of C-Triarylglucoside Compounds Useful as SGLT-2 Inhibitors. CN Patent 107556276, 2018.

22. Salvi, L.; Kim, J. G.; Walsh, P. J. Practical Catalytic Asymmetric Synthesis of Diaryl-, Aryl heteroaryl-, and Diheteroarylmethanols. *J. Am. Chem. Soc.* **2009**, *131*, 12483–12493.

23. Alecu, I. M.; Zheng, J.; Zhao, Y.; Truhlar, D. G. Computational Thermochemistry: Scale Factor Databases and Scale Factors for Vibrational Frequencies Obtained from Electronic Model Chemistries. *J. Chem. Theory Comput.* **2010**, *6*, 2872–2887.

24. Ribeiro, R. F.; Marenich, A. V.; Cramer, C. J.; Truhlar, D. G. Use of Solution-Phase Vibrational Frequencies in Continuum Models for the Free Energy of Solvation. *J. Phys. Chem. B.* **2011**, *115*, 14556–14562.

25. Funes-Ardoiz, I., Paton, R. S. GoodVibes: GoodVibes 2.0.2 <http://doi.org/10.5281/zenodo.595246> (2016).
